# Supplementary material for: The Clonal Evolution of Metastatic Osteosarcoma as Shaped by Cisplatin Treatment
Source: Oxford University Press journal article supplement (doi:10.1158/1541-7786.mcr-18-0620), 2019-01-16
Supplement: 15417786mcr180620-sup-203413_3_supp_5190924_prxs6x.xlsx [file 15417786mcr180620-sup-203413_3_supp_5190924_prxs6x.xlsx]

## Sheet: SuppTable1
Supplementary Table S1. Sample and treatment information for relapsed osteosarcoma patients
Patient ID	Sample ID	Pre-treatment or relapse	Site	Weeks after diagnosis	Treatment received	Cisplatin signature
SJOS001101	M1	Relapse	Lung left lower lobe basilar metastasis	48	Cisplatin, doxorobucin, methotrexate, and bevacizumab per OS08 trial reported in PMID 28631382	High (>0.4)
SJOS001101	M2	Relapse	Right lateral chest wall metastasis	70	Cisplatin, doxorobucin, methotrexate, and bevacizumab per OS08 trial reported in PMID 28631382	High (>0.4)
SJOS001101	M3	Relapse	Lung right lower lobe metastasis	70	Cisplatin, doxorobucin, methotrexate, and bevacizumab per OS08 trial reported in PMID 28631382	High (>0.4)
SJOS001101	M4	Relapse	Lung right upper lobe metastasis	70	Cisplatin, doxorobucin, methotrexate, and bevacizumab per OS08 trial reported in PMID 28631382	High (>0.4)
SJOS001101	M5	Relapse	Superior mediastinal mass metastasis	70	Cisplatin, doxorobucin, methotrexate, and bevacizumab per OS08 trial reported in PMID 28631382	High (>0.4)
SJOS001101	M6	Relapse	Lung left upper lobe metastasis	70	Cisplatin, doxorobucin, methotrexate, and bevacizumab per OS08 trial reported in PMID 28631382	High (>0.4)
SJOS001101	M7	Relapse	Lung left lower lobe metastasis	70	Cisplatin, doxorobucin, methotrexate, and bevacizumab per OS08 trial reported in PMID 28631382	High (>0.4)
SJOS001101	M8	Relapse	Diaphragmatic nodule/lung left lower lobe metastasis	70	Cisplatin, doxorobucin, methotrexate, and bevacizumab per OS08 trial reported in PMID 28631382	High (>0.4)
SJOS001105	D1	Pre-treatment	Primary tumor at left proximal humerus	0	None	None
SJOS001105	R1	Relapse	Left distal femur metastasis	88	Cisplatin, doxorobucin, methotrexate, and bevacizumab per OS08 trial reported in PMID 28631382	High (>0.4)
SJOS001105	D2	Relapse	Lung left upper lobe metastasis	95	Cisplatin, doxorobucin, methotrexate, and bevacizumab per OS08 trial reported in PMID 28631382	High (>0.4)
SJOS001107	D1	Pre-treatment	Primary tumor at left proximal humerus	0	None	None
SJOS001107	M1	Pre-treatment	Lung right upper lobe metastasis (at diagnosis)	0	None	None
SJOS001107	M2	Relapse	Lung left lower lobe metastasis	73	Cisplatin, doxorobucin, methotrexate, and bevacizumab per OS08 trial reported in PMID 28631382	High (>0.4)
SJOS010	D	Relapse	Left tibia metastasis	407	After diagnosis received 3 courses of ifosfamide and carboplatin, followed by surgery, then 1 course of doxorubicin, 3 courses of high-dose methotrexate, another course of doxorubicin, 1 course of ifosfamide and carboplatin, 3 courses of high-dose methotrexate, then 2 courses of doxorubicin. The next treatment received was non-protocol cisplatin/doxorubicin/cyclophosphamide beginning ~4 years aft…	Low (<0.2)
SJOS010	M	Relapse	Lung right upper lobe metastasis	488	After diagnosis received 3 courses of ifosfamide and carboplatin, followed by surgery, then 1 course of doxorubicin, 3 courses of high-dose methotrexate, another course of doxorubicin, 1 course of ifosfamide and carboplatin, 3 courses of high-dose methotrexate, then 2 courses of doxorubicin. The next treatment received was non-protocol cisplatin/doxorubicin/cyclophosphamide beginning ~4 years aft…	None
SJOS001112	M2	Relapse	Lung metastasis	~100	Chemotherapy including carboplatin; no cisplatin	None
SJOS001	M	Relapse	Rib metastasis	213	Non-protocol chemotherapy including ifosfamide, doxorubicin, cisplatin, and high-dose methotrexate	None

## Sheet: SuppTable2
Supplementary Table S2. SJOS0011101 SNVs detected by capture validation and tumor purity
					Site:	M1	M1	M2	M2	M3	M3	M4	M4	M5	M5	M6	M6	M7	M7	M8	M8
					Tumor Purity:	0.41		0.69		0.71		0.13		0.77		0.77		0.91		0.74
					Anatomy:	Lung left lower lobe basilar		Right lateral chest wall		Lung right lower lobe		Lung right upper lobe		Superior mediastinal mass		Lung left upper lobe		Lung left lower lobe		Diaphragmatic nodule/lung left lower lobe
Chrom.Site.Ref.Alt	Gene	AminoAcidChange	Class	Germline_MutantReads	Germline_TotalReads	M1_MutantReads	M1_TotalReads	M2_MutantReads	M2_TotalReads	M3_MutantReads	M3_TotalReads	M4_MutantReads	M4_TotalReads	M5_MutantReads	M5_TotalReads	M6_MutantReads	M6_TotalReads	M7_MutantReads	M7_TotalReads	M8_MutantReads	M8_TotalReads
chr12.9227196.G.C	A2M	T1239R	missense	0	173	0	238	102	315	73	185	0	228	0	154	0	60	0	119	0	141
chr7.48686053.G.A	ABCA13	E62_UTR_3	UTR_3	0	290	1	497	172	482	0	417	0	385	0	377	0	263	0	395	0	443
chr17.66891154.C.T	ABCA8	G882E	missense	0	240	0	480	1	571	0	459	10	354	0	416	0	210	72	435	0	506
chr3.52002975.G.T	ABHD14B	E4_UTR_3	UTR_3	0	94	0	190	0	168	26	129	0	204	0	173	0	45	1	87	0	51
chr6.26599894.G.T	ABT1	E3_UTR_3	UTR_3	0	294	1	421	82	412	0	353	0	319	0	518	0	218	0	388	0	366
chr15.89416229.C.T	ACAN	L2398F	missense	0	120	0	113	54	183	0	155	0	137	0	152	0	46	0	39	0	66
chr17.48551076.C.G	ACSF2	S509C	missense	0	301	0	371	0	448	0	316	0	457	0	352	1	114	48	187	0	272
chr20.25002041.T.A	ACSS1	P364P	silent	0	83	1	172	0	190	23	139	0	114	0	230	0	52	0	97	0	105
chr2.74143810.G.A	ACTG2	G302E	missense	0	261	0	356	0	338	0	343	17	282	1	318	0	116	59	221	0	212
chr8.39581287.G.T	ADAM18	G680C	missense	1	637	3	1036	0	1231	216	1160	0	816	0	653	0	418	0	1076	0	1168
chr15.84685245.C.A	ADAMTSL3	P1423T	missense	0	439	11	488	0	625	0	592	0	378	87	484	42	204	0	223	0	266
chr2.70902703.A.G	ADD2	E12_UTR_3	UTR_3	1	185	18	339	1	447	0	364	0	313	57	306	17	95	0	212	1	202
chr10.112839372.T.C	ADRA2A	E1_UTR_3	UTR_3	0	71	0	131	0	175	30	116	0	137	0	94	0	28	0	87	0	56
chr4.7765110.G.A	AFAP1	E18_UTR_3	UTR_3	0	101	0	255	0	264	0	224	14	183	1	295	2	89	27	162	0	193
chr11.62300133.C.T	AHNAK	G586S	missense	0	158	0	237	45	259	0	221	2	282	0	270	0	87	0	199	0	180
chr6.151679581.A.C	AKAP12	E5_UTR_3	UTR_3	0	296	0	454	166	555	1	335	0	427	0	495	0	248	0	255	0	482
chr19.15465817.G.C	AKAP8	A663G	missense	0	194	0	228	35	140	0	137	0	184	0	181	0	74	0	138	0	129
chr7.91709458.G.T	AKAP9	V2671F	missense	0	258	0	335	1	377	0	253	0	247	1	316	42	178	0	204	0	315
chr7.134241510.C.T	AKR1B15	E2_UTR_5	UTR_5	0	80	0	164	0	185	44	137	0	131	0	173	0	69	0	107	0	147
chr9.116150034.T.C	ALAD	E12_UTR_3	UTR_3	0	178	0	193	76	149	0	159	0	186	0	175	0	58	0	141	0	95
chr12.105416323.T.C	ALDH1L2	E23_UTR_3	UTR_3	0	218	0	367	126	472	0	318	0	352	0	304	0	172	0	418	0	327
chr11.43923093.A.G	ALKBH3	N163D	missense	0	172	0	198	0	126	0	115	0	171	0	192	0	86	0	103	41	79
chr4.113362168.A.T	ALPK1	R1212*	nonsense	0	404	0	457	0	504	0	475	0	419	0	374	0	165	0	203	105	341
chr10.61788501.C.T	ANK3	E44_UTR_3	UTR_3	0	234	0	378	0	784	0	576	0	316	0	246	0	169	0	184	79	203
chr19.4224725.C.A	ANKRD24	E22_UTR_3	UTR_3	0	88	0	206	0	228	30	126	0	191	0	167	0	47	0	120	0	105
chr18.14754896.A.T	ANKRD30B	A171_E4splice	splice	0	218	1	325	101	313	1	277	0	264	0	267	1	124	0	284	2	395
chr1.150192752.T.C	ANP32E	E7_UTR_3	UTR_3	0	157	0	283	0	319	49	248	0	213	0	268	0	143	0	284	0	269
chr2.69372757.C.G	ANTXR1	E13_UTR_3	UTR_3	2	447	0	782	0	1238	206	737	0	737	0	682	0	314	0	557	0	452
chr2.69372759.G.T	ANTXR1	E13_UTR_3	UTR_3	1	455	0	773	0	1238	206	737	1	738	0	681	0	325	0	560	0	444
chr2.70053400.A.G	ANXA4	E13_UTR_3	UTR_3	0	237	3	289	0	435	1	319	15	275	1	270	0	135	45	175	37	180
chr17.36646752.G.T	ARHGAP23	G1037V	missense	0	88	0	208	0	214	0	151	0	184	0	137	0	67	0	94	33	110
chr4.86922972.A.T	ARHGAP24	E10_UTR_3	UTR_3	0	186	0	396	134	349	0	404	0	291	0	310	0	135	0	266	0	315
chr4.86922973.G.T	ARHGAP24	E10_UTR_3	UTR_3	0	191	0	403	134	349	0	415	0	296	0	313	0	133	0	270	0	318
chr11.100861542.A.T	ARHGAP42	E24_UTR_3	UTR_3	0	214	27	337	0	282	0	342	0	269	114	295	42	153	0	176	0	322
chr1.156909496.G.A	ARHGEF11	R1274W	missense	0	147	0	296	55	306	0	315	2	235	0	314	0	74	1	203	0	157
chr15.80886678.G.T	ARNT2	E19_UTR_3	UTR_3	0	253	7	405	0	548	0	470	2	333	61	452	34	156	0	152	1	133
chr7.95157547.C.T	ASB4	P304S	missense	0	113	13	195	0	189	0	184	0	175	29	148	17	70	0	141	0	152
chr8.62577540.T.C	ASPH	E5_UTR_3	UTR_3	0	267	0	342	1	492	32	351	1	263	0	378	0	182	0	290	0	268
chr19.3928037.T.A	ATCAY	E13_UTR_3	UTR_3	2	213	0	267	0	259	21	172	1	254	0	226	0	67	0	153	1	161
chr3.193180583.G.A	ATP13A4	D497D	silent	0	393	0	480	0	320	117	486	0	394	6	294	0	152	0	330	0	318
chr3.193023395.A.T	ATP13A5	P877P	silent	0	383	0	501	178	936	157	1054	1	497	0	410	0	182	1	457	1	372
chr3.52440902.T.A	BAP1	E201V	missense	0	87	8	132	0	113	0	98	0	111	18	78	11	28	0	78	0	60
chr7.72855441.C.T	BAZ1B	E20_UTR_3	UTR_3	0	86	6	112	0	138	1	118	0	96	23	126	8	49	0	86	26	80
chr18.60793715.T.C	BCL2	E3_UTR_3	UTR_3	0	179	0	199	0	316	0	207	5	173	1	146	0	60	45	93	0	117
chr18.60793714.C.A	BCL2	E3_UTR_3	UTR_3	0	179	0	203	0	316	0	209	5	173	1	143	0	64	45	93	0	118
chr11.27679901.A.G	BDNF	L71L	silent	0	202	0	319	0	310	1	214	0	276	0	323	21	133	0	172	0	199
chr4.79766128.A.G	BMP2K	D198G	missense	0	199	0	310	0	226	0	294	0	239	2	273	29	178	0	327	0	418
chr9.16436838.C.G	BNC2	D452H	missense	0	365	26	296	0	411	0	388	0	372	81	261	41	107	0	292	0	211
chr20.31628056.G.C	BPIL3	H359_E11splice	splice	0	148	20	164	0	162	0	120	4	171	73	220	15	50	37	133	55	170
chrX.79962985.G.T	BRWD3	G831G	silent	0	190	1	187	0	239	69	139	0	191	0	116	0	98	0	108	0	152
chr17.56378850.C.T	BZRAP1	E32_UTR_3	UTR_3	0	128	0	233	0	384	0	262	0	199	0	230	0	76	0	171	36	207
chr12.31815127.G.T	C12orf72	W80C	missense	0	173	0	227	0	394	0	223	0	246	0	217	0	102	0	203	54	219
chr14.60903188.G.C	C14orf39	E18_UTR_3	UTR_3	0	138	0	264	77	327	0	211	0	195	0	147	0	70	0	196	0	157
chr16.46836764.C.A	C16orf87	E4_UTR_3	UTR_3	0	262	0	428	163	539	0	434	0	352	1	323	0	151	1	298	0	342
chr17.71745991.T.C	C17orf54	E4_exon	exon	0	110	0	149	36	163	0	142	0	130	0	138	1	62	0	87	0	129
chr17.30662392.G.C	C17orf75	Q207E	missense	0	168	0	226	0	222	0	164	0	200	0	156	0	77	0	135	41	175
chr18.30950038.G.A	C18orf34	S108S	silent	0	216	0	329	136	404	0	289	0	246	0	195	0	113	0	193	0	246
chr19.757605.C.T	C19orf21	P220L	missense	0	54	3	74	0	76	0	70	0	119	36	75	7	24	0	53	0	36
chr19.16623819.A.T	C19orf44	V547_E6splice_region	splice_region	0	151	0	205	0	162	0	146	0	203	8	169	14	69	0	102	0	106
chr19.16612272.A.G	C19orf44	G223G	silent	0	399	0	332	0	318	8	264	0	325	0	320	0	87	0	195	0	202
chr19.41247897.C.A	C19orf54	E6_UTR_3	UTR_3	0	182	0	178	0	192	0	146	0	229	0	204	0	24	18	73	0	127
chr17.77045281.G.A	C1QTNF1	E4_UTR_3	UTR_3	0	179	15	449	0	564	0	512	0	341	0	460	0	125	0	304	0	325
chr1.162825443.G.T	C1orf110	A98D	missense	0	379	0	698	0	882	0	705	1	595	2	776	0	338	124	917	0	703
chr1.247738757.A.G	C1orf150	E5_UTR_3	UTR_3	0	257	0	315	0	283	39	265	0	290	0	212	0	132	0	175	1	235
chr1.162351901.G.A	C1orf226	E113E	silent	0	70	0	152	0	159	24	144	0	157	0	173	0	60	0	178	0	133
chr1.34643088.T.C	C1orf94	E1_UTR_5	UTR_5	0	90	0	168	27	180	32	107	0	123	0	125	0	33	0	99	0	81
chr20.30617637.C.A	C20orf160	E8_UTR_3	UTR_3	0	131	0	283	81	250	0	174	0	229	0	298	1	83	0	153	0	234
chr22.24937959.T.C	C22orf13	E6_UTR_3	UTR_3	0	167	0	254	0	227	0	198	0	240	0	227	0	73	45	131	0	126
chr2.55407798.T.A	C2orf63	Q411L	missense	0	274	0	342	0	451	69	375	0	329	1	340	0	128	0	274	1	257
chr3.50596395.C.T	C3orf18	E6_UTR_3	UTR_3	0	142	15	192	0	202	0	193	15	227	34	174	7	36	19	103	20	81
chr5.43446270.T.A	C5orf28	E3_UTR_3	UTR_3	0	409	0	534	134	670	0	423	0	514	0	548	0	294	1	1007	0	610
chr7.92166497.A.G	C7orf64	E5_UTR_3	UTR_3	0	89	0	140	0	104	0	92	0	121	0	126	0	56	0	68	21	115
chr8.67809032.A.C	C8orf45	P488P	silent	0	293	0	307	113	558	0	302	0	267	0	392	0	150	0	217	0	275
chr8.104145336.G.T	C8orf56	E2_exon	exon	0	120	3	369	1	545	0	333	12	237	0	388	0	151	43	283	0	205
chr9.86570503.A.C	C9orf64	V130V	silent	0	410	0	542	0	390	0	560	0	434	2	353	30	155	0	444	0	455
chr12.2786349.G.T	CACNA1C	V1688L	missense	0	83	0	181	0	240	46	136	0	155	0	183	0	57	0	94	1	134
chr1.181708289.G.C	CACNA1E	D1207H	missense	0	267	0	439	0	526	0	395	0	391	0	488	0	161	0	375	65	323
chr3.50400300.A.G	CACNA2D2	E38_UTR_3	UTR_3	0	133	0	123	0	109	0	98	0	143	0	125	0	32	0	77	13	47
chr19.54488063.C.T	CACNG8	E4_UTR_3	UTR_3	0	103	0	122	55	149	0	68	0	137	0	100	0	55	0	78	1	88
chr5.179156989.G.T	CANX	E15_UTR_3	UTR_3	1	513	18	831	0	772	0	826	27	719	132	781	61	397	144	624	0	760
chr3.15262316.A.G	CAPN7	K156E	missense	0	130	1	202	0	180	0	125	3	127	0	156	0	81	39	150	34	179
chr1.19671748.T.A	CAPZB	Q196L	missense	0	77	0	130	35	186	0	123	0	149	0	137	1	46	0	57	0	95
chr15.40916718.A.T	CASC5	K1445M	missense	0	257	52	347	0	306	0	303	13	234	85	308	35	130	161	303	107	240
chr7.143003143.G.C	CASP2	E11_UTR_3	UTR_3	0	256	0	288	0	369	0	282	0	332	36	317	0	145	0	182	0	259
chr10.74311049.G.T	CBARA1	I127I	silent	0	249	29	314	0	373	0	288	11	270	51	157	33	155	66	168	82	174
chr7.31592760.A.T	CCDC129	D41V	missense	1	195	0	313	0	299	0	184	8	204	0	238	0	112	51	250	0	230
chr7.31692629.A.G	CCDC129	E14_UTR_3	UTR_3	0	244	1	355	103	362	0	280	0	343	0	308	0	182	0	355	0	355
chr4.24838086.A.C	CCDC149	L236R	missense	0	469	7	875	0	1342	0	1009	26	668	0	928	0	350	140	821	97	918
chr1.159860391.C.G	CCDC19	D51H	missense	0	452	3	660	0	622	0	629	21	558	2	768	0	271	109	691	91	575
chr14.91804911.C.T	CCDC88C	E271E	silent	0	50	0	43	0	198	24	101	0	63	0	68	0	23	0	34	0	26
chr17.34417383.G.A	CCL3	L8F	missense	0	113	0	166	67	167	0	119	0	115	0	162	0	67	0	116	0	145
chr11.69468584.G.C	CCND1	E5_UTR_3	UTR_3	0	270	1	381	0	400	71	310	0	396	0	448	0	156	0	222	0	206
chr1.158264010.G.T	CD1C	E6_UTR_3	UTR_3	1	867	51	1351	0	1478	0	1151	0	1066	187	1498	108	807	1	1714	216	1773
chr17.72477930.G.T	CD300A	K244N	missense	0	115	1	265	0	362	0	234	0	223	0	241	5	86	0	174	0	209
chr17.72518282.C.A	CD300LB	E4_UTR_3	UTR_3	0	128	0	280	0	423	1	285	16	253	0	286	0	105	51	231	0	257
chr11.35219673.T.A	CD44	S268T	missense	0	105	0	112	0	95	0	72	7	117	0	90	0	58	40	77	0	76
chr6.44376201.G.T	CDC5L	Q308H	missense	1	254	0	651	0	689	0	535	14	392	1	886	0	396	76	580	1	642
chr6.44376200.A.G	CDC5L	Q308R	missense	0	252	0	645	0	686	1	532	14	392	2	879	0	395	76	580	0	638
chr16.68712527.C.G	CDH3	P172A	missense	0	139	0	273	0	301	76	234	0	219	0	282	0	86	0	111	1	203
chr5.26988385.A.G	CDH9	V19A	missense	1	410	131	543	238	514	149	384	13	421	291	480	118	280	256	811	238	493
chr7.92355059.G.C	CDK6	R140G	missense	0	221	2	452	0	459	0	331	0	291	64	323	0	190	0	248	0	333
chr4.76504056.T.C	CDKL2	E12_UTR_3	UTR_3	1	289	0	470	0	407	0	457	0	369	0	548	0	333	0	552	93	682
chr10.11378407.A.G	CELF2	E15_UTR_3	UTR_3	0	337	0	239	0	324	83	250	0	313	0	219	0	96	0	113	0	135
chr1.111702109.G.T	CEPT1	L149L	silent	0	155	0	284	0	333	1	260	9	185	0	310	0	142	47	239	0	313
chr15.93569192.A.G	CHD2	E39_UTR_3	UTR_3	0	316	0	447	0	350	0	365	0	410	47	492	0	168	0	290	0	364
chr12.106632286.C.T	CKAP4	E2_UTR_3	UTR_3	0	176	1	164	0	179	0	148	13	233	0	180	0	51	30	106	34	109
chr1.11888654.A.G	CLCN6	N365S	missense	0	142	1	215	0	285	0	208	12	190	0	208	0	76	30	137	22	123
chr1.16375450.C.T	CLCNKB	E1_UTR_5	UTR_5	0	41	0	65	0	81	18	53	0	65	0	91	0	18	0	24	0	28
chr13.96086277.C.T	CLDN10	H64Y	missense	0	298	0	569	229	628	0	524	0	504	0	464	0	175	0	438	0	405
chr4.184239723.C.G	CLDN22	E1_UTR_3	UTR_3	0	219	0	414	0	312	77	187	0	339	1	334	0	162	0	292	0	361
chr7.73768331.C.G	CLIP2	T267S	missense	0	94	14	243	0	293	0	194	1	215	49	214	10	75	0	106	0	148
chr7.23625120.A.G	CLK2P	E1_exon	exon	0	311	26	459	0	481	0	309	18	382	73	381	22	198	92	356	74	343
chr3.150780473.A.T	CLRN1OS	E4_exon	exon	0	373	30	403	0	419	0	439	0	371	103	313	81	221	0	304	0	324
chr3.140251164.A.G	CLSTN2	I449_E9splice	splice	0	258	0	344	0	412	0	429	0	310	4	265	41	152	0	244	0	250
chr5.79025270.A.G	CMYA5	K228E	missense	0	507	0	567	0	707	103	507	0	543	0	451	1	212	0	335	0	450
chr8.87917430.T.A	CNBD1	R91_E3splice_region	splice_region	0	174	15	304	0	470	0	364	5	221	36	323	35	164	47	213	58	268
chr2.125367487.C.T	CNTNAP5	C621C	silent	0	102	0	197	0	177	10	102	0	137	0	176	0	60	0	132	0	148
chr9.100884395.G.A	CORO2A	E12_UTR_3	UTR_3	0	273	0	388	112	354	0	394	0	370	0	293	0	127	0	298	0	236
chr8.68423848.G.A	CPA6	S120S	silent	2	571	1	1121	215	1812	2	1084	2	823	2	1124	1	512	2	776	1	822
chr3.9771272.G.A	CPNE9	E520K	missense	0	254	0	692	0	551	0	411	1	537	0	744	35	271	0	570	0	566
chr11.68566692.T.A	CPT1A	T229T	silent	0	182	0	323	0	397	36	286	0	314	0	311	1	106	0	215	0	276
chr5.149492865.T.A	CSF1R	E1_UTR_5	UTR_5	0	105	0	198	64	204	0	131	3	221	0	194	0	51	1	77	1	117
chr1.34191075.G.T	CSMD2	P817H	missense	0	293	0	478	1	679	0	455	0	385	0	467	0	214	1	417	75	452
chr5.122930838.G.C	CSNK1G3	V395_E11splice_region	splice_region	1	215	0	395	0	433	0	328	6	267	0	314	0	174	63	344	0	368
chr11.57575738.C.T	CTNND1	Q689*	nonsense	0	367	0	557	152	617	87	358	1	473	1	563	0	251	0	552	0	429
chr16.67963974.A.G	CTRL	C220R	missense	0	65	0	146	0	136	57	128	0	145	0	172	0	53	0	56	0	90
chr1.110039920.A.T	CYB561D1	E4_UTR_3	UTR_3	0	234	0	339	71	328	0	262	0	322	0	421	1	94	1	208	0	226
chr10.96443490.T.C	CYP2C18	E1_UTR_5	UTR_5	0	221	21	351	0	479	0	269	0	309	65	196	43	163	0	240	0	216
chr13.49282197.A.T	CYSLTR2	E1_UTR_3	UTR_3	0	170	9	282	1	254	0	188	0	206	24	181	23	109	0	274	0	239
chr14.59798167.A.G	DAAM1	K601E	missense	0	84	0	193	44	326	0	154	0	144	0	121	0	47	0	104	0	117
chr4.155264733.C.A	DCHS2	R289M	missense	0	56	0	111	0	241	0	251	1	73	0	95	0	45	23	86	20	93
chr20.76975.C.A	DEFB125	P130T	missense	0	607	0	994	0	985	0	723	2	642	0	984	0	487	1	719	141	1033
chr12.56333208.G.A	DGKA	D202N	missense	0	423	0	497	0	525	81	483	0	540	0	401	0	138	0	455	0	318
chr15.51741257.C.A	DMXL2	G3012V	missense	0	135	2	244	0	145	0	174	13	162	41	206	20	79	45	179	0	237
chr12.124272389.C.A	DNAH10	A426D	missense	0	54	0	126	44	122	0	69	0	119	1	90	0	19	0	73	0	65
chr1.225152218.G.C	DNAH14	R135S	missense	0	297	8	343	0	338	0	271	0	347	56	214	0	126	0	321	0	223
chr2.84831579.G.T	DNAH6	R995S	missense	0	236	0	369	0	483	64	336	0	313	1	314	1	121	1	274	0	251
chr2.196741265.T.G	DNAH7	M2039_E37splice_region	splice_region	0	263	0	400	0	505	0	320	0	309	0	360	0	165	0	248	86	369
chr9.114415583.G.A	DNAJC25	E4_UTR_3	UTR_3	0	149	1	206	0	169	0	185	0	186	0	177	0	91	46	165	0	153
chr5.169445958.T.A	DOCK2	Q1079_E33splice_region	splice_region	0	411	1	718	219	664	0	642	0	585	1	667	0	313	0	514	0	560
chr21.39426881.A.G	DSCR4	E3_UTR_3	UTR_3	0	346	0	483	159	696	0	458	0	445	3	485	0	197	0	489	0	495
chr18.29045295.G.A	DSG3	R429H	missense	0	192	0	165	0	234	0	184	0	161	0	134	0	65	0	97	9	134
chr4.36345576.G.A	DTHD1	E9_UTR_3	UTR_3	0	697	1	1711	391	2055	0	2036	1	1212	1	1281	0	557	0	1397	0	1658
chr2.73989874.T.C	DUSP11	S350G	missense	0	242	0	407	144	444	0	487	0	332	0	342	0	205	0	336	0	268
chr1.21544514.C.T	ECE1	E19_UTR_3	UTR_3	0	62	0	142	0	181	0	131	11	100	0	181	0	36	17	103	0	94
chr1.21137273.A.T	EIF4G3	Y1512N	missense	0	226	0	322	0	442	0	286	0	264	0	317	29	97	0	267	0	267
chr4.101439228.C.G	EMCN	E1_UTR_5	UTR_5	0	288	0	391	0	376	73	428	0	318	2	313	0	172	0	205	0	301
chr2.55122149.C.T	EML6	S947L	missense	0	330	16	406	0	511	0	363	17	351	72	365	24	180	81	269	0	242
chr10.119245955.T.A	EMX2OS	E4_exon	exon	0	290	0	399	135	441	0	379	0	492	0	266	0	128	0	228	0	265
chr7.155257036.C.G	EN2	E2_UTR_3	UTR_3	0	31	3	54	0	62	0	42	2	46	8	52	6	38	12	33	14	37
chr4.71510249.C.T	ENAM	Q1036*	nonsense	0	318	0	478	0	455	0	387	0	431	73	390	0	229	0	427	0	466
chr22.40140061.C.A	ENTHD1	E483*	nonsense	0	245	0	380	0	343	0	250	0	295	0	311	0	138	1	324	57	259
chr9.111945016.T.A	EPB41L4B	Q827L	missense	0	213	0	164	0	140	30	171	0	179	0	176	0	69	0	124	0	123
chr1.38227560.T.G	EPHA10	K123Q	missense	0	130	0	144	0	162	0	114	0	147	0	139	5	28	0	84	0	83
chr8.95655625.A.T	ESRP1	H119L	missense	0	132	0	370	0	748	0	478	0	262	0	439	0	162	0	266	46	181
chr14.76948470.G.T	ESRRB	L209_E6splice	splice	0	160	0	220	52	295	1	189	0	219	0	167	0	53	0	101	0	116
chr3.138197099.T.A	ESYT3	E23_UTR_3	UTR_3	0	203	0	229	0	280	33	262	0	238	0	187	0	103	0	188	0	159
chr5.137848537.C.A	ETF1	G216G	silent	0	177	1	183	0	221	1	177	0	218	0	144	0	52	0	131	35	157
chr4.5785444.A.T	EVC	R577W	missense	0	301	25	427	0	450	0	348	0	419	88	321	0	104	0	254	0	398
chr14.69695779.A.T	EXD2	M69L	missense	0	172	120	265	245	371	147	227	54	267	148	206	61	83	179	182	166	192
chr14.57673490.C.G	EXOC5	E18_UTR_3	UTR_3	0	226	0	367	0	777	96	463	0	312	0	260	0	152	0	299	0	253
chr6.66041548.A.T	EYS	E12_UTR_3	UTR_3	0	126	7	149	0	160	0	138	0	113	0	117	0	48	0	129	0	110
chr5.175915995.G.T	FAF2	R104L	missense	1	531	4	866	0	695	0	769	33	650	1	766	0	422	117	601	138	745
chrX.63411618.T.A	FAM123B	N517Y	missense	0	412	0	416	0	357	0	237	0	513	0	325	0	95	0	183	76	182
chr19.17534494.A.G	FAM125A	S178_E6splice_region	splice_region	0	188	0	187	55	165	0	138	0	188	0	187	0	51	0	121	0	88
chr2.187628172.C.G	FAM171B	E8_UTR_3	UTR_3	0	204	0	354	0	335	87	272	0	253	0	248	0	137	0	236	0	310
chr12.49993464.G.T	FAM186B	S653S	silent	0	177	0	210	0	360	56	194	0	276	0	172	0	67	0	97	0	106
chr4.91703090.T.G	FAM190A	E8_UTR_3	UTR_3	0	268	9	321	0	317	0	300	0	250	28	197	0	156	0	224	0	299
chr3.150377741.T.A	FAM194A	S644C	missense	1	231	14	244	0	294	0	301	0	237	53	202	26	95	0	154	0	179
chr2.16733024.G.T	FAM49A	E12_UTR_3	UTR_3	0	268	0	354	0	452	59	382	0	314	1	274	0	158	0	254	0	228
chr2.16732482.G.A	FAM49A	E12_UTR_3	UTR_3	0	101	45	163	112	221	41	176	16	152	61	118	27	67	72	106	26	102
chr2.16734208.T.A	FAM49A	Q323L	missense	0	244	27	295	0	373	0	321	0	236	0	222	0	116	0	200	0	185
chr2.97317764.T.A	FER1L5	E211_E7splice_region	splice_region	0	124	9	165	0	196	0	207	0	177	22	125	8	37	0	100	22	131
chr9.95768325.G.A	FGD3	G234R	missense	0	86	0	182	0	147	41	173	0	160	0	122	0	43	0	157	0	140
chr6.97063596.A.G	FHL5	N268S	missense	0	202	0	208	0	284	0	202	0	161	0	137	29	73	0	58	0	144
chr17.39974421.G.A	FKBP10	V158M	missense	0	80	1	109	0	96	0	81	0	138	0	90	0	39	22	55	14	93
chr11.128682527.G.T	FLI1	E9_UTR_3	UTR_3	0	320	23	489	0	467	0	395	0	417	70	472	1	164	0	169	0	372
chr8.75614696.G.T	FLJ39080	E3_splice_region	splice_region	0	178	50	373	114	669	64	288	15	277	52	327	29	168	82	231	71	248
chr20.14307606.C.T	FLRT3	D183N	missense	0	205	0	429	0	394	0	269	0	241	0	434	0	186	94	355	0	458
chr11.71927903.T.C	FOLR2	E1_UTR_5	UTR_5	0	151	0	208	0	258	37	206	0	195	0	178	0	82	0	190	0	206
chr1.47901810.G.C	FOXD2	E1_UTR_5	UTR_5	0	144	28	261	1	315	0	220	0	220	84	235	13	65	0	141	0	145
chrX.55649843.A.T	FOXR2	E1_UTR_5	UTR_5	0	289	0	320	0	289	48	195	1	317	0	113	0	112	0	197	0	203
chr6.41739100.G.C	FRS3	P246A	missense	0	112	0	188	0	179	69	158	0	142	0	313	0	72	0	144	0	124
chr13.32783806.A.G	FRY	I1454V	missense	0	294	0	509	0	496	0	382	0	453	72	421	0	208	0	444	0	469
chr2.186604120.G.A	FSIP2	L138L	silent	0	327	1	590	0	595	78	436	0	479	0	480	0	185	0	375	0	558
chr4.162459446.C.A	FSTL5	G395V	missense	1	395	17	434	0	752	0	843	0	350	37	385	0	148	0	338	0	384
chr19.5838938.A.G	FUT6	E1_UTR_5	UTR_5	0	142	0	270	0	283	41	178	0	202	0	227	0	85	0	130	0	132
chr5.39138777.C.T	FYB	G459E	missense	0	388	0	647	168	841	0	491	0	541	0	528	0	408	0	953	0	601
chr5.39135062.C.T	FYB	G524R	missense	0	272	33	541	0	793	1	418	0	463	173	418	25	261	0	820	0	431
chr6.89888340.T.C	GABRR1	E10_UTR_3	UTR_3	0	480	1	480	42	617	0	455	0	512	0	352	0	188	0	161	0	345
chr1.68153780.A.T	GADD45A	E4_UTR_3	UTR_3	0	288	0	535	0	679	100	492	0	517	0	613	0	269	0	493	0	570
chr2.166605208.A.T	GALNT3	E11_UTR_3	UTR_3	0	266	141	540	187	549	147	429	49	388	224	529	94	194	268	384	213	483
chr4.174169407.T.A	GALNT7	F135I	missense	0	176	0	300	0	352	0	512	0	246	0	200	0	112	0	202	55	260
chr4.72611889.A.T	GC	E12_UTR_3	UTR_3	0	126	0	150	41	159	0	188	0	156	0	141	0	92	0	157	0	169
chr1.118409077.T.C	GDAP2	E14_UTR_3	UTR_3	0	185	70	332	116	455	54	267	23	236	146	340	52	138	182	393	128	307
chr10.117817104.G.C	GFRA1	E11_UTR_3	UTR_3	0	172	1	206	0	226	44	163	0	195	0	139	0	76	0	127	0	136
chr7.150417433.C.T	GIMAP1-GIMAP5	A114V	missense	0	79	0	129	0	171	0	101	9	128	0	138	0	52	31	78	0	109
chr1.35228980.C.A	GJB4	E2_UTR_3	UTR_3	0	284	2	324	0	396	0	258	0	331	51	332	0	104	0	227	0	268
chr1.35227528.C.A	GJB4	R225R	silent	1	144	0	216	0	260	1	203	0	218	2	228	20	68	0	148	1	183
chr3.141934488.T.G	GK5	D65A	missense	1	416	20	601	0	671	0	752	0	494	88	562	51	282	1	444	0	469
chr12.75893315.C.A	GLIPR1	E6_UTR_3	UTR_3	0	274	0	302	0	397	0	228	0	318	0	225	0	135	1	340	73	280
chr4.175563239.T.G	GLRA3	E10_UTR_3	UTR_3	1	357	14	366	0	394	0	776	0	349	0	376	0	159	0	257	0	362
chr4.175649704.C.A	GLRA3	G138V	missense	0	198	13	294	0	287	0	515	0	244	0	269	0	122	0	206	0	244
chr5.32125640.T.C	GOLPH3	E4_UTR_3	UTR_3	0	229	21	348	0	457	0	270	0	285	139	316	34	220	1	583	0	337
chr7.107115615.T.C	GPR22	T370T	silent	0	174	0	276	0	297	70	182	0	264	0	226	0	137	0	176	0	253
chr14.88478538.T.G	GPR65	E2_UTR_3	UTR_3	0	777	0	597	192	1172	191	1008	0	625	0	469	1	226	0	515	0	523
chr15.72452761.G.C	GRAMD2	E12_UTR_3	UTR_3	0	232	0	234	0	137	0	163	9	221	0	247	0	77	29	165	0	175
chr5.178406623.C.A	GRM6	E10_UTR_3	UTR_3	0	211	0	208	0	158	37	161	0	168	0	172	0	64	0	106	0	147
chr22.19136507.G.A	GSC2	C205C	silent	0	60	0	127	0	135	0	89	0	125	0	130	0	30	0	77	15	72
chr1.110260285.T.A	GSTM5	E8_UTR_3	UTR_3	0	284	4	330	0	420	0	275	19	333	0	359	0	130	47	416	0	266
chr6.158617492.A.C	GTF2H5	E3_UTR_3	UTR_3	0	268	77	347	123	372	77	174	14	330	150	347	47	121	93	148	142	311
chr4.156710987.A.G	GUCY1B3	E140G	missense	0	59	1	99	0	214	0	166	0	80	0	86	0	48	0	59	13	58
chr17.7907447.G.C	GUCY2D	E333D	missense	0	32	0	38	24	74	0	41	0	65	0	44	0	16	0	46	0	28
chr5.21473997.G.A	GUSBP1	E6_exon	exon	0	143	1	202	46	214	0	149	0	151	0	188	0	80	0	228	0	105
chr4.174451255.G.A	HAND2	E1_UTR_5	UTR_5	0	44	0	60	1	71	17	120	0	73	0	63	0	18	0	36	0	40
chr5.43289935.C.A	HMGCS1	E11_UTR_3	UTR_3	0	190	0	244	99	392	0	201	0	210	0	216	0	131	0	439	0	252
chr20.43059666.C.A	HNF4A	E10_UTR_3	UTR_3	0	278	0	475	94	321	0	236	0	333	0	474	0	192	0	276	0	408
chr1.152191813.G.A	HRNR	G764G	silent	0	37	0	100	0	117	0	67	0	56	2	100	7	44	0	89	0	64
chr5.118813180.A.T	HSD17B4	K140*	nonsense	0	507	4	697	0	719	100	558	1	560	0	675	0	312	0	491	0	573
chr13.31711191.C.T	HSPH1	E18_UTR_3	UTR_3	0	201	0	374	0	348	84	267	0	312	0	337	0	153	0	318	0	357
chr1.79116217.A.G	IFI44	N113D	missense	0	286	24	483	1	694	0	452	10	398	81	551	32	252	115	563	103	571
chr17.47132062.C.A	IGF2BP1	E15_UTR_3	UTR_3	0	132	13	195	0	239	0	174	3	195	35	141	10	48	24	78	29	132
chr17.47132063.C.A	IGF2BP1	E15_UTR_3	UTR_3	0	131	13	195	0	240	0	176	3	195	35	141	10	48	23	77	29	132
chr6.160509142.A.G	IGF2R	T2095A	missense	0	256	0	364	119	369	0	201	0	318	0	436	0	155	0	137	0	264
chr11.18737144.G.C	IGSF22	Q456E	missense	0	172	0	190	0	218	0	173	0	230	39	201	0	54	0	111	0	151
chr1.159898394.G.A	IGSF9	S928S	silent	0	103	0	199	0	213	31	202	0	208	0	288	0	65	0	141	0	137
chr8.42189833.C.A	IKBKB	E22_UTR_3	UTR_3	0	284	0	523	124	821	0	580	0	435	1	338	0	216	0	396	0	475
chr17.37922723.C.G	IKZF3	V284L	missense	0	169	1	194	0	193	0	177	7	188	0	174	0	59	28	118	33	131
chr2.113820486.A.T	IL1F5	E5_UTR_3	UTR_3	0	256	131	430	195	461	141	483	56	383	229	446	27	98	169	267	154	313
chr6.137322906.G.A	IL20RA	P484L	missense	0	115	16	160	0	237	1	181	6	124	26	195	10	47	34	65	16	130
chr17.43922417.C.T	IMP5	L49F	missense	0	174	14	310	0	353	0	282	0	344	73	277	22	82	0	150	0	174
chr15.41377616.G.A	INO80	A275V	missense	1	345	0	369	1	365	1	349	0	315	0	341	0	117	0	357	75	294
chr2.99198148.A.G	INPP4A	S932G	missense	0	234	0	332	0	361	0	353	8	291	1	333	0	110	61	166	1	247
chr4.106604071.C.T	INTS12	G403E	missense	0	277	1	440	164	538	0	482	0	359	1	342	0	155	0	215	0	322
chr10.59954133.A.G	IPMK	E6_UTR_3	UTR_3	0	257	0	334	0	638	52	456	0	268	1	181	0	141	0	204	0	202
chr13.98676509.A.G	IPO5	E29_UTR_3	UTR_3	0	212	0	284	0	293	0	244	0	203	0	322	0	119	0	186	64	381
chr2.237272570.G.A	IQCA1	A574A	silent	0	245	90	371	1	257	0	247	15	317	119	306	32	95	70	207	131	285
chr15.67665000.G.A	IQCH	K435K	silent	1	360	17	550	0	328	0	351	21	410	82	500	38	219	115	363	0	426
chr12.108963030.G.A	ISCU	E6_UTR_3	UTR_3	0	214	9	327	0	355	1	257	0	286	39	268	27	128	0	192	1	199
chr7.20451063.C.G	ITGB8	E14_UTR_3	UTR_3	0	121	18	217	1	195	0	122	0	165	0	155	0	89	0	159	1	259
chr6.33663924.A.G	ITPR3	E58_UTR_3	UTR_3	0	174	1	362	0	363	0	310	0	291	2	519	17	173	0	228	1	241
chr11.96124806.A.G	JRKL	I331M	missense	1	190	0	239	49	419	0	295	0	176	0	196	0	63	0	169	0	180
chr16.75664354.T.A	KARS	D492V	missense	0	169	8	248	0	221	0	187	0	151	25	173	21	84	0	100	0	183
chr3.42730480.T.G	KBTBD5	V514G	missense	0	57	0	136	0	142	0	123	0	118	0	99	0	33	29	97	0	58
chr19.49571409.G.A	KCNA7	E2_UTR_3	UTR_3	0	157	1	143	54	162	0	154	0	178	0	125	0	51	0	72	1	113
chr19.50827011.C.T	KCNC3	G400D	missense	0	79	1	112	0	94	0	86	0	102	0	76	0	37	16	48	0	80
chr14.90651134.C.T	KCNK13	D338D	silent	0	130	0	127	0	344	0	212	4	166	0	124	0	35	36	93	0	67
chr2.26952390.A.T	KCNK3	E2_UTR_3	UTR_3	0	213	15	288	0	332	0	334	0	284	5	265	16	95	1	132	0	136
chr11.2666695.C.T	KCNQ1OT1	E1_exon	exon	0	129	11	173	0	201	0	155	0	177	33	148	21	71	0	159	48	143
chr19.6413266.C.A	KHSRP	E20_UTR_3	UTR_3	0	87	0	95	0	65	0	70	0	87	2	79	9	25	0	45	0	35
chr16.71962125.A.G	KIAA0174	E10_UTR_3	UTR_3	0	108	12	242	0	239	0	186	0	171	40	219	10	91	0	135	0	211
chr10.30306728.G.T	KIAA1462	E4_UTR_3	UTR_3	1	381	27	305	1	371	0	296	0	364	63	211	31	102	0	170	0	158
chr20.36869309.C.A	KIAA1755	E408D	missense	0	159	85	455	132	365	85	307	22	334	159	557	22	193	75	319	99	394
chr3.44889515.A.G	KIF15	E1245G	missense	0	204	0	267	0	200	0	243	0	160	2	170	15	96	0	245	0	165
chr17.43011666.C.T	KIF18B	G274R	missense	0	97	0	164	51	176	0	171	0	155	0	129	0	44	0	172	0	157
chr4.55593627.G.A	KIT	G565R	missense	0	290	1	730	1	599	130	481	0	341	0	409	0	238	0	356	0	447
chr14.45414903.C.A	KLHL28	E77*	nonsense	0	235	20	412	0	385	0	276	14	256	37	300	14	168	40	309	50	322
chr14.45414902.T.A	KLHL28	E77V	missense	0	238	20	412	0	387	0	277	14	256	37	300	14	168	40	309	50	322
chr19.51385558.C.A	KLKP1	E5_exon	exon	0	547	0	754	2	757	0	659	0	730	1	641	0	254	0	447	207	572
chr12.53185163.C.G	KRT3	E454D	missense	0	81	0	108	0	125	0	114	0	124	0	93	0	44	24	57	0	56
chr19.35981269.C.A	KRTDAP	G26C	missense	0	209	0	285	82	282	0	215	0	309	0	291	0	80	0	142	0	246
chr1.62675553.G.A	L1TD1	E369E	silent	0	151	0	247	0	293	0	173	0	206	0	284	0	101	0	198	17	205
chr1.183091345.C.A	LAMC1	T787K	missense	0	457	0	784	0	1015	0	785	0	679	1	746	0	316	0	954	108	770
chr7.55479606.G.C	LANCL2	A278P	missense	0	170	0	280	0	320	36	237	0	251	0	243	0	127	0	223	0	255
chrX.37535904.C.G	LANCL3	E6_UTR_3	UTR_3	0	297	0	253	0	182	0	184	0	258	0	145	0	85	70	157	0	193
chr8.98864498.A.T	LAPTM4B	E7_UTR_3	UTR_3	0	218	0	466	0	684	0	525	21	255	0	554	0	225	61	314	0	259
chr22.34157529.C.G	LARGE	E3_UTR_5	UTR_5	0	235	0	411	0	378	0	308	0	299	2	298	27	128	0	263	0	265
chr1.152671535.G.T	LCE2A	G53V	missense	0	73	0	139	37	164	0	98	0	93	0	146	0	50	0	168	0	137
chr4.17882958.T.C	LCORL	E7_UTR_3	UTR_3	0	313	49	442	0	387	0	333	14	278	49	373	31	162	71	322	89	465
chr13.46726978.C.T	LCP1	G226R	missense	0	158	0	262	0	317	0	203	0	222	0	227	0	114	0	233	38	208
chr2.136567101.G.T	LCT	P939Q	missense	0	102	0	165	0	179	0	139	0	143	0	121	0	33	0	79	27	133
chr13.39952578.G.T	LHFP	G157G	silent	0	130	0	226	62	203	0	195	0	206	0	207	0	84	0	175	1	200
chr22.30640839.C.T	LIF	A35T	missense	0	165	0	255	0	191	0	169	0	286	1	229	0	78	31	117	0	124
chr19.54818422.G.A	LILRA5	E7_UTR_3	UTR_3	0	146	0	175	0	136	0	78	0	141	0	137	0	74	0	104	44	142
chr16.11642692.T.G	LITAF	E4_UTR_3	UTR_3	0	134	0	124	0	144	0	108	6	124	0	133	0	47	30	114	0	127
chr12.98906912.T.A	LOC100128191	E2_exon	exon	0	192	75	253	80	259	59	195	19	222	96	178	35	80	64	146	77	130
chr12.98906913.C.A	LOC100128191	E2_exon	exon	0	192	58	226	80	259	59	195	19	222	96	178	35	80	64	146	77	130
chr9.138466827.A.T	LOC100130954	E1_exon	exon	0	47	3	64	0	35	0	54	0	67	10	47	6	22	0	48	0	42
chr7.7136321.C.T	LOC100131257	E1_exon	exon	0	424	24	606	0	686	2	476	0	535	103	613	0	267	0	550	0	452
chr10.127263660.C.A	LOC100169752	E2_exon	exon	0	111	0	162	0	200	29	120	0	143	0	103	0	43	0	100	0	102
chr13.19920069.G.A	LOC100287114	E2_exon	exon	0	73	1	124	0	122	1	97	8	89	0	89	0	39	21	82	0	87
chr13.28711198.T.A	LOC100288730	E2_exon	exon	0	235	2	271	0	336	0	245	13	310	0	255	0	133	46	246	60	256
chr13.113622249.G.T	LOC100289410	E1_exon	exon	0	84	0	100	0	75	0	68	0	92	0	91	0	28	0	45	26	82
chr2.28112778.G.C	LOC100302650	E1_exon	exon	0	177	0	320	0	412	0	335	0	239	0	224	0	92	0	216	52	203
chr9.117430601.C.T	LOC100505478	K48K	silent	0	201	0	284	130	260	0	275	1	269	0	220	0	146	0	207	0	226
chr12.98849440.G.C	LOC121456	E1_exon	exon	0	186	4	202	0	244	0	163	0	215	44	165	0	77	0	179	0	129
chr19.10764038.C.G	LOC147727	E1_exon	exon	0	110	85	301	56	218	46	150	37	224	168	368	47	107	154	266	124	206
chr9.107537276.C.G	LOC286367	E1_exon	exon	0	275	23	445	0	292	0	378	0	401	82	368	41	192	0	394	0	355
chr13.75129628.C.G	LOC338864	E3_exon	exon	0	92	7	159	0	213	0	124	0	140	30	126	11	63	0	110	0	141
chr13.25155687.A.G	LOC374491	E1_exon	exon	0	267	27	449	0	496	0	359	0	423	97	393	39	224	0	451	0	493
chr10.27538629.A.T	LOC387646	E1_exon	exon	0	192	24	247	0	292	0	232	17	249	56	146	24	56	54	101	42	120
chr22.46508372.C.G	LOC400931	E6_exon	exon	0	52	16	84	26	59	18	50	6	70	24	79	5	20	16	35	14	29
chr1.190594021.G.C	LOC440704	E1_exon	exon	0	332	6	613	0	661	0	523	0	407	77	532	0	262	0	677	0	618
chr3.9431809.T.C	LOC440944	E3_exon	exon	0	184	12	516	0	327	1	257	0	273	37	331	15	196	0	393	1	396
chr4.76287534.G.A	LOC441025	E4_exon	exon	0	318	27	459	0	445	0	431	8	382	71	540	80	349	99	643	103	642
chrX.98975922.A.C	LOC442459	E6_exon	exon	0	179	0	150	71	174	70	135	0	197	0	106	0	46	0	53	0	74
chr18.5144724.C.G	LOC642597	E2_UTR_3	UTR_3	0	243	41	394	0	845	0	675	0	312	77	298	46	177	0	291	0	363
chr9.35862435.G.A	LOC92973	E1_exon	exon	0	176	19	322	0	378	0	290	0	298	52	274	27	122	0	213	0	217
chr18.44219639.C.T	LOXHD1	G151S	missense	0	230	1	280	0	338	0	232	0	294	1	179	0	76	0	136	66	152
chr6.160952834.G.A	LPA	P2017L	missense	0	397	0	393	0	340	57	159	0	314	0	385	0	142	0	177	0	361
chr4.155665674.G.A	LRAT	G66R	missense	0	86	0	156	0	225	56	241	0	114	0	122	0	47	0	89	0	108
chr12.57588875.G.T	LRP1	A2767S	missense	0	66	1	132	2	126	0	104	0	130	21	112	0	33	0	98	0	68
chr3.169557801.C.T	LRRC31	S543N	missense	0	559	0	563	183	769	1	678	0	636	0	565	0	347	1	580	0	573
chr1.90062681.A.T	LRRC8B	E8_UTR_3	UTR_3	0	377	0	494	0	639	107	462	0	462	0	504	0	296	0	605	0	619
chr1.90062682.G.T	LRRC8B	E8_UTR_3	UTR_3	0	378	0	487	1	646	107	462	0	462	0	511	0	293	0	608	0	620
chr1.90399828.A.G	LRRC8D	R401G	missense	0	193	1	276	0	337	40	239	0	232	1	246	0	131	0	307	0	263
chr2.80530006.C.A	LRRTM1	G313G	silent	0	86	0	162	0	133	0	137	0	112	0	133	0	37	0	54	18	70
chr3.194392984.C.G	LSG1	E1_UTR_5	UTR_5	0	103	0	159	0	149	0	240	8	141	0	125	0	47	28	75	0	101
chr3.194393098.G.C	LSG1	E1_UTR_5	UTR_5	0	105	0	146	0	133	0	205	1	123	0	113	0	27	34	90	0	78
chr22.21344739.A.G	LZTR1	K239R	missense	0	97	0	159	0	176	0	131	12	136	0	202	0	44	12	64	0	89
chr4.120980696.A.G	MAD2L1	E5_UTR_3	UTR_3	0	111	26	250	0	216	0	207	5	181	38	169	16	102	57	189	38	214
chr1.166991339.C.A	MAEL	E12_UTR_3	UTR_3	0	335	1	577	1	668	0	579	21	443	0	506	1	284	87	568	0	568
chr1.166991340.T.C	MAEL	E12_UTR_3	UTR_3	0	328	0	577	0	674	1	590	19	440	0	511	1	283	87	568	1	576
chr4.86937350.C.A	MAPK10	E13_UTR_3	UTR_3	0	337	0	389	138	389	0	390	0	302	0	297	0	147	0	250	0	322
chr6.36077118.C.A	MAPK14	E12_UTR_3	UTR_3	0	159	3	357	0	455	0	376	0	314	66	574	25	209	0	334	0	337
chr4.164445963.A.T	2018-03-01	E8_UTR_3	UTR_3	0	194	0	285	0	452	0	415	0	240	0	214	0	110	68	197	0	236
chr12.69239187.G.T	MDM2	E11_UTR_3	UTR_3	0	284	0	349	0	429	0	312	0	348	0	308	0	158	0	331	80	234
chr17.37596872.T.A	MED1	G89_E4splice_region	splice_region	0	328	16	366	0	450	0	368	0	345	0	342	0	159	0	276	0	391
chr17.37566931.C.G	MED1	A515P	missense	0	354	4	395	0	302	0	266	0	302	0	290	1	91	0	228	75	247
chr19.42837769.A.G	MEGF8	Q67R	missense	0	260	0	441	0	487	0	393	1	446	8	454	23	135	0	233	0	323
chr17.41717929.G.A	MEOX1	E3_UTR_3	UTR_3	0	673	0	620	219	744	0	493	1	674	0	602	1	204	0	373	0	497
chr7.130128708.C.A	MESTIT1	E2_exon	exon	0	281	2	373	0	357	0	311	14	392	0	338	0	192	85	243	80	365
chr10.103558803.C.T	MGEA5	K535K	silent	0	308	0	317	0	398	0	337	0	371	0	222	0	159	0	235	79	241
chr18.19429264.G.A	MIB1	C834Y	missense	0	320	14	448	0	466	0	368	0	410	90	330	39	205	1	411	1	571
chr10.129905828.C.T	MKI67	G1426S	missense	0	481	3	513	0	557	0	503	0	550	0	339	0	182	0	394	142	385
chr12.88176728.T.C	MKRN9P	E1_exon	exon	0	129	10	231	0	273	0	184	7	196	44	188	23	69	32	268	46	216
chr11.102650395.T.C	MMP10	I63V	missense	0	248	0	393	0	565	0	491	0	337	0	320	0	149	0	190	82	386
chr10.28347503.T.C	MPP7	N443S	missense	0	242	9	291	0	448	0	280	0	312	0	200	0	109	0	181	0	189
chr11.19076764.G.A	MRGPRX2	E2_UTR_3	UTR_3	0	184	0	305	0	447	0	305	0	262	3	234	38	145	0	253	0	292
chr11.60557912.A.T	MS4A10	N35I	missense	0	109	0	156	0	216	0	155	0	198	0	201	0	58	0	166	19	117
chr6.151247409.G.C	MTHFD1L	G412R	missense	0	376	64	583	1	514	0	390	1	457	110	584	46	222	3	221	101	474
chr1.237015912.G.T	MTR	G596V	missense	0	202	3	341	0	286	0	332	15	276	0	226	0	111	62	137	1	193
chr1.237015911.G.T	MTR	G596W	missense	0	201	3	340	0	286	0	332	15	276	0	226	0	114	62	137	0	193
chr19.9083695.C.T	MUC16	R2707K	missense	0	334	38	561	0	597	0	370	23	451	75	402	44	207	188	410	118	397
chr16.29848108.G.A	MVP	G246G	silent	0	78	8	114	0	122	0	83	0	146	19	111	5	19	0	61	0	98
chr17.10299739.C.A	MYH8	E1521*	nonsense	0	106	5	190	0	297	0	166	0	182	37	155	23	68	0	209	0	104
chr22.26165010.G.T	MYO18B	G376V	missense	0	202	14	292	1	332	0	215	13	241	57	259	26	114	49	182	33	187
chr17.34863350.T.C	MYO19	E452G	missense	0	152	0	212	64	208	0	125	0	144	0	157	0	70	0	112	0	140
chr15.59564648.C.A	MYO1E	G2*	nonsense	0	290	0	373	0	208	0	284	0	306	1	323	0	99	0	204	59	272
chr2.171225852.A.T	MYO3B	Q312H	missense	0	471	0	573	0	551	97	412	0	511	0	520	0	171	0	401	2	494
chr2.171056770.G.A	MYO3B	G99G	silent	1	188	0	298	0	302	0	245	0	267	0	311	0	101	0	258	56	285
chr1.24383188.C.T	MYOM3	E37_UTR_3	UTR_3	0	326	42	575	0	799	0	552	21	445	79	671	40	168	81	489	75	596
chr2.73868583.C.T	NAT8	G58E	missense	0	139	0	264	0	222	0	190	0	176	0	226	0	58	0	127	31	119
chr1.183559396.C.G	NCF2	K23N	missense	0	237	22	509	0	705	0	491	0	428	72	463	19	171	0	509	0	467
chr2.133542469.G.C	NCKAP5	P639A	missense	0	296	22	508	0	485	0	338	0	417	0	399	0	138	0	260	0	360
chr10.26879096.G.A	NCRNA00264	E1_exon	exon	0	228	19	303	0	406	0	290	0	270	59	186	22	75	0	131	0	163
chrX.43808802.C.T	NDP	E3_UTR_3	UTR_3	0	146	0	224	0	181	33	113	0	196	1	95	0	73	0	110	0	120
chr22.29885141.C.T	NEFH	P504P	silent	0	211	1	197	0	169	36	133	0	197	0	169	1	60	0	140	0	130
chr17.29553616.G.A	NF1	G722E	missense	0	302	6	393	0	288	0	251	21	357	0	214	0	138	103	214	71	189
chr6.137304124.C.A	NHEG1	E3_exon	exon	0	206	0	272	74	331	61	251	0	200	0	257	0	95	0	109	0	254
chr1.116379714.C.G	NHLH2	E2_UTR_3	UTR_3	0	184	0	257	0	300	0	209	0	197	0	247	0	142	50	252	0	246
chr3.52510580.A.T	NISCH	S295C	missense	0	79	0	115	36	128	0	108	0	114	0	98	0	39	0	101	0	52
chr3.173997085.T.C	NLGN1	L432L	silent	0	377	0	621	169	760	0	762	0	509	0	490	0	367	0	681	0	573
chr3.160969581.G.A	NMD3	E16_UTR_3	UTR_3	0	158	0	296	94	420	0	330	0	229	0	261	0	147	0	277	0	261
chr3.139280037.C.A	NMNAT3	A155S	missense	0	173	0	291	102	307	0	364	0	247	0	229	0	107	1	215	0	184
chr16.50765755.A.T	NOD2	E12_UTR_3	UTR_3	1	359	0	382	0	462	81	334	0	443	0	298	0	114	0	206	0	224
chr1.200017565.C.T	NR5A2	S243S	silent	0	71	11	182	0	221	0	153	2	127	20	152	10	68	25	151	24	139
chr8.32620845.T.C	NRG1	F460L	missense	0	260	0	400	0	551	77	431	0	313	0	285	0	230	0	295	0	259
chr8.32504369.C.T	NRG1	E1_UTR_5	UTR_5	0	117	0	247	67	303	0	237	0	207	0	134	0	95	0	143	0	131
chr15.41673245.T.A	NUSAP1	E11_UTR_3	UTR_3	0	212	33	238	0	234	0	224	0	189	44	272	1	80	0	167	31	170
chr1.102462592.G.A	OLFM3	E1_UTR_5	UTR_5	0	53	0	113	0	97	13	102	0	76	0	101	0	54	0	100	0	112
chr16.3254936.C.A	OR1F1	S230S	silent	0	134	0	155	0	153	0	92	0	130	3	168	13	81	0	104	0	224
chr11.55606587.G.T	OR5D16	M120I	missense	0	294	83	456	0	513	0	387	11	358	180	443	62	215	103	580	71	540
chr11.7818241.C.T	OR5P2	V83V	silent	0	289	13	336	0	455	0	309	9	299	63	276	38	132	84	274	0	290
chr19.9298301.T.C	OR7D2	E1_UTR_3	UTR_3	1	332	0	484	0	499	0	380	0	404	0	387	36	200	0	407	0	423
chr11.124413009.A.T	OR8B12	L181H	missense	0	229	0	395	0	406	0	373	25	303	0	272	0	156	78	181	0	337
chr12.48921728.C.A	OR8S1	P308T	missense	0	110	0	144	79	299	1	180	0	142	0	113	0	50	0	96	0	139
chr11.69481743.C.T	ORAOV1	E5_UTR_3	UTR_3	0	212	0	305	91	318	0	221	0	263	0	313	0	70	0	189	0	171
chr3.125271461.C.T	OSBPL11	M406I	missense	0	155	24	230	0	181	0	148	0	197	0	206	0	95	0	181	0	132
chr1.52254607.T.C	OSBPL9	E23_UTR_3	UTR_3	0	342	3	469	0	742	0	494	27	430	0	475	0	223	115	494	0	456
chr11.65564452.C.A	OVOL1	E4_UTR_3	UTR_3	0	75	4	104	0	116	0	93	1	119	31	101	16	62	0	98	0	70
chr1.17394573.G.A	PADI2	E16_UTR_3	UTR_3	0	194	27	298	0	375	0	263	0	290	55	347	32	93	0	234	0	240
chr10.89469038.G.T	PAPSS2	G38V	missense	0	510	55	669	0	764	0	611	0	624	101	379	70	280	0	382	0	376
chr6.162864359.T.C	PARK2	N52D	missense	0	156	2	204	0	241	0	181	0	161	31	178	0	83	0	99	0	175
chr4.75937823.C.A	PARM1	P78T	missense	0	451	0	821	205	667	0	700	0	620	0	808	0	386	1	750	0	840
chr10.55581759.G.A	PCDH15	R1916R	silent	0	130	19	248	0	396	0	358	6	183	38	155	22	120	49	221	53	200
chr9.78923644.G.T	PCSK5	E28_exon	exon	0	242	1	536	1	630	0	757	0	419	0	602	0	236	93	640	71	578
chr10.105191938.G.A	PDCD11	E1141K	missense	0	255	0	281	0	387	0	292	0	319	4	182	28	116	1	197	0	203
chr7.31877556.A.T	PDE1C	V337E	missense	0	181	19	372	0	387	0	246	0	256	52	232	29	139	0	289	0	323
chr2.10930865.C.A	PDIA6	V227F	missense	0	492	0	487	0	685	0	534	0	467	0	365	2	217	103	366	0	353
chr7.94296177.G.A	PEG10	E2_UTR_3	UTR_3	0	141	0	279	0	267	0	166	13	205	0	220	0	75	50	169	0	190
chr2.64321293.C.T	PELI1	E7_UTR_3	UTR_3	0	244	26	388	0	514	0	374	12	333	73	382	32	167	102	350	88	296
chr10.3178638.A.G	PFKP	H743_E22splice_region	splice_region	0	55	0	115	33	213	0	129	0	86	0	107	0	24	0	53	0	47
chr3.169811802.T.A	PHC3	E15_UTR_3	UTR_3	0	139	0	301	0	405	0	310	0	236	2	249	32	163	0	260	0	308
chr10.61005786.T.C	PHYHIPL	E5_UTR_3	UTR_3	0	277	0	519	0	1036	137	803	0	415	0	308	0	244	0	259	0	357
chr3.178947913.A.T	PIK3CA	Q928_E19splice_region	splice_region	0	414	0	591	0	792	1	738	0	555	12	561	43	213	0	616	0	532
chr17.8792447.G.T	PIK3R5	F298_E9splice_region	splice_region	0	53	0	147	35	168	0	116	0	117	0	125	0	38	0	91	0	84
chr7.99987578.C.T	PILRA	T174T	silent	0	167	2	318	1	359	1	277	10	295	0	262	0	116	43	145	53	207
chr6.7987481.T.C	PIP5K1P1	E1_exon	exon	0	199	0	217	0	233	0	150	0	214	0	197	0	78	43	187	0	193
chr22.46653795.C.G	PKDREJ	A1809P	missense	0	140	0	186	64	162	52	146	0	180	0	175	0	63	0	131	0	128
chr5.41310157.C.A	PLCXD3	E3_UTR_3	UTR_3	0	515	67	763	1	845	0	536	0	557	0	712	0	392	1	1063	0	661
chr6.161152164.G.A	PLG	W446*	nonsense	0	126	13	191	0	251	0	97	0	149	38	230	21	102	0	99	0	222
chr6.161143531.G.T	PLG	K396N	missense	0	176	41	248	0	276	0	132	0	182	35	216	17	105	0	113	57	240
chr7.131196070.A.G	PODXL	L75L	silent	0	180	0	208	0	199	12	153	0	210	0	187	0	75	0	108	0	161
chr8.43152458.G.A	POTEA	A148A	silent	0	125	0	229	0	383	1	274	0	190	30	152	0	106	2	244	0	260
chr4.147562304.A.G	POU4F2	E2_UTR_3	UTR_3	0	345	3	430	0	825	0	810	19	414	1	424	2	175	91	276	61	344
chr22.46632129.C.T	PPARA	E9_UTR_3	UTR_3	0	45	11	103	0	101	0	57	5	86	26	88	4	23	24	79	21	86
chr4.23803901.C.T	PPARGC1A	R696H	missense	0	422	209	622	293	834	386	636	32	473	296	732	116	285	375	791	460	882
chr1.40222421.A.G	PPIE	E10_UTR_3	UTR_3	1	306	6	356	0	487	0	379	0	381	63	398	0	148	0	259	0	277
chr7.94898719.G.T	PPP1R9A	W1008C	missense	0	242	21	332	1	257	0	204	11	259	44	259	24	124	74	244	63	292
chr17.74541408.G.A	PRCD	E5_UTR_3	UTR_3	0	212	18	355	0	445	1	400	0	352	53	366	10	100	0	190	0	238
chr1.52870258.G.A	PRPF38A	E1_UTR_5	UTR_5	0	100	0	176	0	195	0	102	0	142	0	167	0	66	0	134	20	124
chr1.153190067.A.T	PRR9	E1_UTR_5	UTR_5	0	221	3	369	0	482	0	404	14	305	0	371	0	151	52	451	34	313
chr1.171509380.A.G	PRRC2C	R923R	silent	0	125	0	196	0	232	0	214	0	183	0	167	9	75	0	234	0	159
chr1.36068779.T.G	PSMB2	E6_UTR_3	UTR_3	0	328	1	409	1	629	0	370	20	366	0	339	0	161	84	338	76	315
chr2.20478484.C.G	PUM2	G606A	missense	0	280	5	464	0	520	0	430	18	399	0	290	0	171	121	441	69	302
chrX.102755720.G.A	RAB40A	E3_UTR_5	UTR_5	0	80	0	75	0	93	0	62	1	97	0	42	0	22	0	19	40	48
chr8.117858641.T.A	RAD21	E14_UTR_3	UTR_3	0	215	0	579	106	1210	0	714	0	287	0	594	0	289	0	486	0	501
chr15.38852134.G.A	RASGRP1	P36P	silent	0	92	0	254	0	235	0	211	0	160	0	188	0	49	38	179	0	164
chr13.48881512.G.A	RB1	W78*	nonsense	0	266	223	426	304	442	207	325	65	324	254	318	164	191	361	365	295	316
chr20.34239030.T.C	RBM12	E2_UTR_3	UTR_3	0	456	0	668	165	530	1	456	1	471	0	968	0	450	0	709	0	925
chr11.66391826.A.T	RBM14	Q160L	missense	0	133	6	254	0	266	0	199	0	217	34	211	16	74	0	188	1	175
chr17.34257683.A.T	RDM1	L17M	missense	0	134	0	202	69	193	0	169	0	188	0	184	0	48	0	121	0	151
chr7.103230229.A.G	RELN	L1320P	missense	0	179	0	327	122	336	0	270	0	267	0	318	0	129	0	296	0	316
chr7.103341383.C.T	RELN	A292A	silent	0	315	0	551	173	516	0	401	0	382	0	465	0	226	0	405	0	487
chr3.186507830.A.G	RFC4	D340D	silent	0	101	10	283	0	259	0	300	0	197	26	314	0	113	1	205	0	345
chr19.6008176.C.G	RFX2	D359H	missense	0	93	0	106	0	117	0	78	0	125	2	113	9	36	0	54	0	50
chr1.182554617.T.C	RNASEL	E442G	missense	0	193	0	378	92	525	0	339	0	340	0	339	0	163	0	398	0	334
chr5.54827567.G.C	RNF138P1	E1_exon	exon	0	165	0	259	0	343	79	269	0	275	0	199	0	109	0	152	0	202
chr17.8297571.G.A	RNF222	E2_UTR_5	UTR_5	0	129	0	228	0	229	1	117	0	132	0	221	0	55	0	170	29	121
chrX.38147121.C.T	RPGR	E582E	silent	0	112	0	109	0	77	0	59	5	108	0	40	0	32	39	65	0	56
chr8.93029450.T.A	RUNX1T1	L49_E2splice_region	splice_region	0	476	35	880	0	1439	0	1020	0	551	100	951	55	418	0	650	0	504
chr16.51175101.C.T	SALL1	L344L	silent	0	289	163	496	386	583	321	458	39	438	260	432	120	215	212	290	188	313
chr2.224467179.G.A	SCG2	E1_UTR_5	UTR_5	0	43	7	137	0	96	0	98	0	90	15	118	6	37	0	86	0	107
chr12.6483923.C.T	SCNN1A	Q9Q	silent	0	103	1	138	0	217	0	157	7	186	0	101	0	54	33	51	20	40
chr10.12211529.T.C	SEC61A2	E13_UTR_3	UTR_3	0	240	1	208	113	374	1	295	0	301	0	189	0	86	0	173	0	150
chr19.40947981.C.T	SERTAD3	G3R	missense	2	480	0	590	177	407	0	503	0	628	0	586	0	138	0	255	0	323
chr3.47164737.T.C	SETD2	E463E	silent	0	230	0	417	0	392	26	383	0	332	0	236	0	145	0	371	0	285
chr8.41120132.G.A	SFRP1	E3_UTR_3	UTR_3	0	291	0	388	1	613	0	460	0	343	0	291	0	136	0	268	59	284
chr20.42199277.G.A	SGK2	R127R	silent	1	154	0	254	57	137	0	122	0	132	0	300	0	82	1	147	0	184
chr22.25251577.A.T	SGSM1	Y244F	missense	0	317	80	380	109	342	82	283	28	341	131	359	58	132	148	285	131	307
chr5.171761324.C.T	SH3PXD2B	E13_UTR_3	UTR_3	0	99	0	181	0	129	0	169	8	168	0	189	0	60	29	110	30	133
chr20.3686560.G.A	SIGLEC1	D179D	silent	0	47	0	80	0	82	0	82	0	68	0	138	0	27	0	59	11	62
chr1.53558351.G.A	SLC1A7	C302C	silent	0	54	0	167	0	171	28	128	1	123	0	150	0	38	1	73	0	62
chr14.58048009.C.T	SLC35F4	A280T	missense	0	98	1	166	1	334	1	184	0	157	0	113	0	66	0	145	41	137
chr5.150843183.G.A	SLC36A1	A71A	silent	0	315	0	399	154	431	0	314	2	348	1	275	1	137	0	287	0	348
chr10.18280228.A.G	SLC39A12	D473G	missense	0	212	0	255	83	377	0	243	0	279	0	173	0	102	0	147	0	184
chr1.95332888.A.G	SLC44A3	Q466R	missense	0	159	19	288	0	376	0	287	0	244	46	319	41	145	0	298	0	282
chr3.27459988.C.T	SLC4A7	V541I	missense	0	124	8	156	1	195	0	133	0	151	40	106	16	48	0	54	0	119
chr2.108628690.G.A	SLC5A7	E9_UTR_3	UTR_3	1	245	62	273	90	305	65	304	23	250	81	262	52	112	147	338	127	331
chr12.85275485.A.G	SLC6A15	E5_UTR_3	UTR_3	0	265	0	346	86	328	0	228	0	305	0	301	0	190	1	386	0	254
chr2.103325823.T.C	SLC9A2	E12_UTR_3	UTR_3	0	209	2	373	0	435	0	435	0	301	48	328	0	136	0	232	0	346
chr13.84451624.G.A	SLITRK1	E1_UTR_3	UTR_3	0	54	0	80	18	64	0	52	0	66	0	34	0	22	0	43	0	49
chr4.146480070.G.T	SMAD1	E7_UTR_3	UTR_3	0	324	0	466	0	877	139	865	0	433	0	477	0	197	0	329	0	504
chr5.135517214.G.A	SMAD5	E7_UTR_3	UTR_3	0	302	0	387	0	369	0	323	0	332	0	339	0	126	0	295	87	359
chr3.47676823.T.G	SMARCC1	T835P	missense	0	391	0	588	0	617	0	588	0	517	0	410	0	200	0	563	112	417
chr9.106885414.G.A	SMC2	E720K	missense	0	218	0	340	0	318	0	442	7	234	1	279	0	165	68	321	0	325
chr1.152850833.A.G	SMCP	E1_UTR_5	UTR_5	0	204	0	374	0	548	0	385	0	313	0	414	25	224	0	453	0	413
chr2.96968940.T.G	SNRNP200	Y113S	missense	0	188	0	243	88	255	0	247	0	228	0	221	0	89	0	149	1	245
chr11.65621039.C.A	SNX32	E13_UTR_3	UTR_3	0	124	10	233	0	268	0	208	0	203	37	232	12	65	0	168	0	154
chr7.2317828.C.T	SNX8	Q69Q	silent	0	118	4	161	0	131	0	90	9	136	0	171	0	43	46	104	13	80
chr1.179323405.A.C	SOAT1	E16_UTR_3	UTR_3	0	231	0	386	70	554	0	311	0	289	0	379	0	175	0	397	0	340
chr21.34927688.A.T	SON	T2051S	missense	0	89	0	175	0	208	0	126	0	148	0	149	0	68	0	98	25	114
chr7.21552619.A.G	SP4	E6_UTR_3	UTR_3	0	114	0	143	0	149	38	98	0	115	0	132	0	88	0	111	0	125
chr7.21552428.A.T	SP4	E6_UTR_3	UTR_3	0	80	0	95	0	89	0	71	0	83	3	98	7	44	0	85	0	94
chr1.118693231.C.G	SPAG17	V84L	missense	0	145	65	252	80	309	65	237	10	166	84	283	41	136	69	210	87	267
chr3.172642081.T.C	SPATA16	R419G	missense	0	341	107	522	314	628	235	547	23	441	103	519	81	292	101	493	141	576
chr4.52963349.A.T	SPATA18	E13_UTR_3	UTR_3	0	405	0	991	0	959	1	768	26	520	2	740	0	407	149	792	0	821
chr4.177105749.C.G	SPATA4	E6_UTR_3	UTR_3	1	173	0	233	64	219	77	361	0	215	0	214	0	116	0	171	0	220
chr20.44164982.A.T	SPINLW1-WFDC6	E5_UTR_3	UTR_3	0	406	0	715	0	545	123	377	0	495	0	890	0	310	0	659	0	783
chr12.53458242.G.T	SPRYD3	E11_UTR_3	UTR_3	0	161	30	143	51	169	40	130	14	184	49	119	14	43	20	37	34	68
chr11.55653095.T.C	SPRYD5	L64P	missense	0	77	4	125	0	151	0	83	0	99	15	103	6	47	0	131	0	140
chr20.36031875.G.T	SRC	E14_UTR_3	UTR_3	0	72	0	173	0	120	38	108	0	139	0	236	0	61	0	90	0	115
chr1.206636022.A.G	SRGAP2	E20_UTR_3	UTR_3	0	198	1	167	0	146	0	139	0	245	0	125	0	40	41	108	0	81
chrX.48206332.A.G	SSX3	E8_UTR_3	UTR_3	0	197	16	176	0	158	1	111	0	199	1	86	21	51	0	109	0	133
chr12.22347000.A.T	ST8SIA1	E5_UTR_3	UTR_3	0	301	2	397	0	709	0	419	56	449	0	256	0	149	120	350	111	386
chrX.123227914.G.C	STAG2	E1209Q	missense	0	288	61	260	122	266	117	220	8	319	74	124	29	61	109	112	72	100
chr10.17757562.G.A	STAM	E14_UTR_3	UTR_3	0	308	95	308	143	460	126	357	29	353	129	190	67	104	184	187	191	220
chr8.74516077.C.A	STAU2	G305W	missense	0	338	0	411	0	574	0	353	14	329	1	459	0	171	116	315	0	307
chr6.152826420.C.A	SYNE1	G232C	missense	0	195	4	307	0	479	0	301	0	260	0	321	0	140	0	193	54	317
chr6.152958398.C.T	SYNE1	E1_UTR_5	UTR_5	0	49	2	97	0	164	0	66	0	73	0	110	0	38	0	36	15	55
chr6.152826421.T.C	SYNE1	K231K	silent	0	199	4	307	0	483	0	307	0	262	0	322	1	143	0	196	54	317
chr12.33529258.A.G	SYT10	E7_UTR_3	UTR_3	0	176	1	268	0	414	0	207	9	252	1	281	0	139	87	283	52	265
chr1.47685230.G.T	TAL1	E4_UTR_3	UTR_3	0	195	0	324	78	310	0	279	0	300	0	319	0	84	0	214	1	193
chr1.234573072.C.T	TARBP1	E727E	silent	0	152	3	246	0	195	0	136	0	223	38	190	35	116	0	243	0	213
chr7.27825088.G.A	TAX1BP1	D278N	missense	0	167	0	302	0	319	0	260	10	244	0	258	0	175	81	287	0	333
chr11.120959268.G.C	TBCEL	E8_UTR_3	UTR_3	0	349	0	579	0	545	0	484	0	412	92	425	0	220	0	252	0	497
chr3.176740711.T.C	TBL1XR1	E16_UTR_3	UTR_3	0	209	18	381	0	537	0	455	1	288	59	290	8	163	0	348	0	282
chr14.55890962.A.C	TBPL2	P322P	silent	0	354	0	357	113	794	0	518	0	383	0	207	0	109	0	203	0	177
chr12.114836392.C.G	TBX5	D166H	missense	0	506	0	565	0	586	0	452	28	605	0	450	0	160	85	266	0	294
chr5.149755899.G.T	TCOF1	A638_E12splice_region	splice_region	0	149	0	230	63	211	0	180	0	219	0	173	1	58	0	90	0	162
chr5.135382179.C.A	TGFBI	P152T	missense	0	76	0	131	0	123	22	101	0	106	0	97	0	36	0	74	0	83
chr3.156395631.G.A	TIPARP	G49R	missense	0	133	0	209	0	308	34	237	0	166	0	155	0	84	0	121	0	118
chr9.75403350.A.G	TMC1	N327S	missense	0	273	0	546	0	618	0	720	0	420	0	551	0	351	95	867	0	715
chr7.150500484.C.A	TMEM176A	A96_E4splice_region	splice_region	0	67	11	154	0	122	0	138	0	132	20	141	9	48	0	74	0	91
chr9.32787069.A.G	TMEM215	E2_UTR_3	UTR_3	0	342	0	307	0	495	0	524	21	394	1	241	0	131	80	299	0	234
chr3.100274252.G.T	TMEM45A	G64_E2splice_region	splice_region	0	726	60	820	1	1250	0	653	1	718	149	570	94	340	0	660	0	664
chr3.100274251.T.G	TMEM45A	G64_E2splice_region	splice_region	0	722	62	819	0	1236	0	653	0	717	149	570	94	340	0	672	0	664
chr21.42836822.G.C	TMPRSS2	E14_UTR_3	UTR_3	0	235	24	354	0	344	0	286	0	266	70	289	19	101	0	191	1	250
chr11.117947927.C.G	TMPRSS4	E1_UTR_5	UTR_5	0	119	0	188	0	241	0	167	8	189	0	197	0	50	31	64	38	137
chr12.88554609.C.G	TMTC3	Q260E	missense	0	276	44	379	0	287	0	253	6	332	42	301	25	164	59	476	58	430
chr18.66365246.T.C	TMX3	S139G	missense	0	252	1	298	123	362	75	284	0	278	1	198	0	106	0	156	0	217
chr6.138202538.G.C	TNFAIP3	E9_UTR_3	UTR_3	0	68	0	158	0	260	0	162	0	124	0	185	0	60	0	61	20	103
chr6.18130962.T.C	TPMT	E225E	silent	0	223	0	234	0	289	65	239	0	236	1	249	0	102	1	187	0	195
chr3.127295655.T.C	TPRA1	F139_E4splice_region	splice_region	0	29	0	68	0	38	16	66	1	70	0	47	0	17	0	28	0	29
chr14.103374309.G.A	TRAF3	E11_UTR_3	UTR_3	0	51	6	142	0	370	0	276	6	132	12	172	6	53	6	106	16	144
chr6.41158081.G.A	TREML2	E5_UTR_3	UTR_3	0	244	1	576	0	493	0	415	19	401	0	869	1	328	72	439	46	387
chr6.42237166.G.A	TRERF1	P55S	missense	0	230	0	488	113	500	0	427	0	376	0	804	0	241	0	359	0	365
chr4.122831422.C.T	TRPC3	R560K	missense	0	199	1	264	0	296	0	310	0	236	53	183	1	108	0	221	0	255
chr15.50903346.A.G	TRPM7	L742L	silent	0	280	0	494	0	262	57	319	0	352	0	517	0	182	0	324	0	400
chr2.234858593.G.C	TRPM8	A315_E9splice	splice	0	97	0	188	0	151	0	140	0	152	0	162	0	49	0	109	34	108
chr7.142626618.T.C	TRPV5	N131S	missense	0	132	0	149	0	148	0	112	0	154	0	146	7	47	0	98	0	89
chr20.36641274.C.T	TTI1	E315E	silent	0	140	0	242	0	201	0	155	0	221	3	361	22	148	0	255	0	300
chr6.80744860.G.T	TTK	Y591_E15splice	splice	1	236	0	314	0	452	113	310	0	334	0	220	0	142	0	252	0	194
chr6.7882635.T.A	TXNDC5	E10_UTR_3	UTR_3	0	231	0	238	0	277	0	229	0	279	2	264	0	124	0	200	56	199
chr12.104742709.C.A	TXNRD1	E15_UTR_3	UTR_3	0	245	1	320	0	396	0	264	17	288	0	244	0	136	72	335	72	230
chr3.49850708.T.C	UBA7	T112A	missense	0	76	0	88	0	108	0	88	0	98	25	79	0	18	0	49	0	35
chr21.43867322.T.C	UBASH3A	E15_UTR_3	UTR_3	0	245	1	294	58	310	0	267	0	250	0	274	1	77	0	209	0	171
chr11.5537362.G.T	UBQLNL	Q104K	missense	0	194	0	260	96	306	0	226	2	252	0	183	0	79	0	171	0	197
chr19.17722604.G.A	UNC13A	P1540L	missense	0	263	0	234	0	228	56	179	0	246	1	235	0	63	0	123	0	142
chr17.73835949.C.A	UNC13D	K342N	missense	0	70	0	97	24	107	1	108	0	79	0	114	0	32	0	67	0	62
chr17.73835950.T.C	UNC13D	K342R	missense	0	69	0	98	24	107	0	111	0	78	0	117	0	32	0	69	0	62
chr6.167704894.T.C	UNC93A	E1_UTR_5	UTR_5	0	232	0	301	92	465	0	297	0	274	0	385	0	162	0	139	0	271
chr12.62783473.T.C	USP15	I520T	missense	0	376	12	484	1	516	0	406	0	445	95	356	55	214	0	454	0	441
chr17.20921322.C.A	USP22	R208M	missense	0	167	10	209	0	237	0	116	0	214	38	196	16	59	0	142	0	177
chr17.20921323.T.C	USP22	R208G	missense	0	165	10	209	0	238	0	116	0	218	38	196	16	59	0	141	0	180
chr16.23077592.C.T	USP31	E16_UTR_3	UTR_3	0	183	0	260	0	336	0	240	0	253	1	247	0	126	0	179	35	329
chr17.9632426.A.C	USP43	E15_UTR_3	UTR_3	0	82	0	161	31	156	26	99	0	121	0	109	0	44	4	108	0	111
chr11.11955434.G.A	USP47	E539E	silent	0	313	0	396	136	417	0	345	0	384	0	297	0	172	0	360	0	373
chr1.171671974.C.T	VAMP4	E8_UTR_3	UTR_3	0	189	0	401	0	583	43	397	1	310	0	342	0	187	1	437	0	375
chr1.108315390.C.T	VAV3	E174E	silent	0	292	0	473	0	596	106	425	0	330	0	526	0	234	0	493	0	497
chr6.133046094.G.A	VNN3	E5_exon	exon	0	323	107	445	302	628	98	375	12	316	138	431	66	170	112	215	205	411
chr8.100160134.C.G	VPS13B	P637A	missense	0	181	16	407	0	733	0	528	0	262	93	486	33	249	0	366	0	287
chr18.30093018.C.A	WBP11P1	E1_exon	exon	0	342	0	276	0	281	0	225	7	270	0	229	0	61	67	153	0	190
chr5.110462430.A.T	WDR36	L903_E23splice	splice	0	156	0	226	62	243	0	282	0	192	0	169	0	82	0	207	0	218
chr19.38382183.C.T	WDR87	S1093_E5splice_region	splice_region	0	146	0	174	0	163	0	108	12	163	0	185	0	31	36	105	0	112
chr7.141408361.G.C	WEE2	E1_UTR_5	UTR_5	0	471	0	500	0	435	0	356	28	408	0	404	0	182	95	283	0	374
chr2.31562497.T.C	XDH	E1211G	missense	0	163	63	259	0	345	0	271	13	194	90	223	36	92	93	150	45	178
chr2.168100225.G.C	XIRP2	E775Q	missense	0	262	0	404	0	379	0	272	0	289	56	325	0	136	0	292	0	376
chr6.43534906.T.A	XPO5	K278N	missense	0	203	0	339	48	275	0	268	0	240	0	443	0	146	0	272	0	256
chr8.21844742.G.A	XPO7	Q556Q	silent	1	316	3	397	0	656	0	342	0	354	73	197	0	106	0	164	0	151
chr12.42604373.C.G	YAF2	E3_exon	exon	0	302	0	359	134	601	0	340	0	363	1	249	0	107	0	195	0	231
chr11.102102666.A.G	YAP1	E9_UTR_3	UTR_3	0	269	1	417	121	543	0	520	0	312	0	325	0	149	0	198	0	346
chr17.7193596.G.T	YBX2	P240T	missense	0	96	0	166	1	231	0	202	20	188	0	136	0	38	24	78	0	101
chr3.167091544.C.T	ZBBX	E3_UTR_5	UTR_5	1	195	0	396	121	468	0	407	0	301	0	309	0	235	0	289	0	395
chr1.197127153.C.A	ZBTB41	E10_UTR_3	UTR_3	0	234	0	343	0	409	40	319	0	220	0	318	0	158	0	339	0	303
chr1.37941223.G.T	ZC3H12A	E42D	missense	0	72	5	138	0	156	0	95	0	115	14	118	7	29	0	88	0	54
chr7.138745078.C.A	ZC3HAV1	UTR_3_E9splice_region	splice_region	0	808	0	837	280	914	0	699	1	820	1	732	0	333	0	530	1	773
chr9.74970806.T.G	ZFAND5	E6_UTR_3	UTR_3	0	144	0	329	0	314	50	382	0	260	0	327	0	136	0	436	0	356
chr15.42729571.T.G	ZFP106	I1512I	silent	0	248	7	295	0	279	0	267	0	219	31	240	21	61	0	246	0	210
chr19.24309176.G.C	ZNF254	G125A	missense	0	225	0	350	0	384	0	283	0	254	0	323	27	153	0	398	0	397
chr11.116652868.T.A	ZNF259	Q393_E12splice_region	splice_region	0	177	0	272	84	271	0	190	0	222	0	274	0	88	1	141	0	193
chr19.44351740.T.C	ZNF283	F329F	silent	0	175	107	226	142	221	100	164	25	200	144	176	41	58	143	148	172	185
chr3.21706434.G.C	ZNF385D	L37V	missense	0	291	124	443	0	391	0	298	76	365	168	395	81	161	249	353	201	356
chr8.28203585.C.A	ZNF395	E10_UTR_3	UTR_3	0	164	55	233	64	284	50	263	4	216	51	172	10	77	31	121	39	109
chr7.148878619.A.T	ZNF398	E6_UTR_3	UTR_3	0	222	0	324	95	286	0	289	0	272	0	349	0	119	0	177	0	231
chr19.57092919.G.A	ZNF470	E6_UTR_3	UTR_3	0	399	29	397	0	339	0	332	1	297	72	305	48	139	0	261	0	340
chr19.56935631.T.A	ZNF583	L535H	missense	0	256	0	336	0	334	0	306	11	267	0	235	0	158	54	216	0	355
chr19.38190587.T.A	ZNF607	K149*	nonsense	0	295	146	313	222	327	156	258	49	301	225	272	101	127	223	226	251	278
chr15.64970423.A.T	ZNF609	R1171W	missense	0	292	29	467	0	365	0	404	0	410	0	497	0	202	0	269	0	364
chr7.63986062.T.C	ZNF680	E4_UTR_3	UTR_3	0	304	0	418	0	420	0	293	0	335	0	371	0	233	0	316	113	439
chr8.81550610.C.A	ZNF704	E9_UTR_3	UTR_3	0	121	1	261	0	405	0	279	12	193	0	233	0	104	32	205	35	155
chr2.185803231.C.T	ZNF804A	I1036I	silent	0	325	0	487	0	493	72	385	1	410	0	455	0	166	0	398	1	529
chr7.30405952.A.G	ZNRF2	E5_UTR_3	UTR_3	0	374	0	455	0	502	0	392	0	389	0	437	0	218	0	447	96	430
chr19.58846163.T.C	ZSCAN22	E2_UTR_5	UTR_5	0	72	4	79	0	100	0	46	0	83	18	67	6	20	0	36	0	61
chr9.14780033.C.T	na	na	NoRepeat	0	554	0	650	231	843	0	753	0	732	0	456	0	231	0	597	0	361
chr6.8516143.G.A	na	na	NoRepeat	0	259	0	314	0	347	50	271	1	293	0	331	0	188	0	379	0	369
chr2.196327442.G.T	na	na	NoRepeat	0	303	16	335	0	363	0	293	14	292	29	275	26	121	80	257	61	331
chr13.21565060.G.A	na	na	NoRepeat	0	105	0	166	1	191	0	138	4	144	0	167	0	62	29	118	0	129
chr3.61873670.A.G	na	na	NoRepeat	0	199	0	221	0	165	0	139	0	182	0	112	0	78	0	100	50	119
chr22.21150974.C.T	na	na	NoRepeat	0	268	0	329	0	339	0	263	0	327	0	346	0	122	0	250	54	239
chr4.75947650.G.C	na	na	NoRepeat	0	345	0	505	0	452	0	465	0	441	7	563	51	336	0	507	0	648
chr10.119658684.T.C	na	na	NoRepeat	0	240	20	275	0	297	0	240	0	281	0	173	0	77	0	204	0	178
chr5.153348632.T.C	na	na	NoRepeat	0	278	25	343	0	359	0	304	10	371	61	270	27	96	75	239	59	259
chr5.107686703.A.C	na	na	NoRepeat	0	241	9	264	2	300	0	253	5	230	43	190	22	100	1	149	39	198
chr4.171457040.G.A	na	na	chr4_171457006_171457183	0	307	25	498	0	720	0	938	0	386	91	459	46	219	1	404	0	519
chr10.52839939.A.C	na	na	NoRepeat	0	375	144	452	404	683	279	490	41	421	221	455	132	238	181	400	199	421
chr5.24193855.G.T	na	na	NoRepeat	0	383	0	597	0	636	66	377	0	405	0	456	0	259	0	767	0	386
chr6.118355254.A.G	na	na	NoRepeat	0	369	14	480	0	657	0	472	0	400	88	279	0	163	0	152	0	323
chr5.72577582.G.A	na	na	chr5_72577354_72577600	0	423	27	405	0	478	1	365	31	434	80	349	29	142	92	292	78	287
chr4.168747529.T.C	na	na	NoRepeat	0	214	0	250	0	418	0	623	0	212	0	231	0	110	0	230	74	301
chr5.58741108.G.A	na	na	NoRepeat	0	276	15	347	0	454	0	414	18	338	85	308	33	131	75	181	82	276
chr4.83824352.T.G	na	na	NoRepeat	0	252	0	439	0	418	0	374	0	308	5	406	28	227	0	460	0	439
chr7.155797091.T.C	na	na	NoRepeat	0	96	3	149	0	193	0	136	0	163	31	188	0	54	0	88	0	121
chr16.32483206.C.T	na	na	NoRepeat	0	213	0	295	0	419	39	301	0	277	0	291	0	125	0	237	0	331
chr18.75031024.T.C	na	na	V$OCT1_06	0	215	76	209	61	245	66	192	24	207	76	112	49	70	110	111	110	131
chr15.97364730.A.T	na	na	NoRepeat	0	191	12	410	0	629	0	477	0	320	70	467	26	218	0	319	0	397
chr10.10226311.A.G	na	na	NoRepeat	0	513	3	541	1	657	0	536	25	522	0	302	0	187	134	337	183	415
chr20.6663753.G.A	na	na	NoRepeat	0	307	31	476	0	507	0	364	23	357	63	572	30	207	78	342	67	436
chr2.85840125.C.A	na	na	NoRepeat	0	48	0	80	31	108	15	55	0	70	0	92	0	25	0	49	0	44
chr9.31365369.C.A	na	na	NoRepeat	0	397	0	411	138	511	137	513	0	434	0	286	0	146	0	349	0	275
chr6.39737044.A.G	na	na	V$FREAC2_01	0	356	4	769	0	717	0	596	13	558	2	1133	0	459	129	842	89	653
chr13.82243813.C.G	na	na	NoRepeat	0	273	0	376	0	453	97	328	0	321	0	350	0	191	0	337	0	364
chr22.30586850.G.A	na	na	NoRepeat	0	171	0	281	0	239	33	172	0	226	0	226	0	99	0	243	1	212
chr15.29824471.G.C	na	na	NoRepeat	0	172	10	310	0	245	0	228	0	215	43	264	0	87	0	171	0	195
chr22.30844282.C.T	na	na	NoRepeat	0	175	0	282	0	208	0	152	0	216	0	235	0	56	0	167	18	109
chr7.124711331.A.T	na	na	NoRepeat	0	215	0	260	1	157	44	173	0	177	0	179	0	110	0	151	0	201
chr9.105040893.G.C	na	na	NoRepeat	0	223	6	343	0	321	0	406	0	258	56	255	19	157	0	324	0	327
chr1.193702399.G.A	na	na	NoRepeat	0	178	68	418	0	457	0	371	20	283	120	369	46	208	116	452	101	372
chr7.126858969.C.A	na	na	chr7_126858748_126859330	0	322	0	367	0	431	0	291	0	358	1	339	0	171	0	292	63	337
chr10.30019886.G.A	na	na	NoRepeat	0	419	0	543	298	832	0	574	2	628	0	399	0	207	1	315	0	322
chr2.147071254.T.A	na	na	chr2_147071200_147071306	0	328	0	422	0	426	0	351	11	331	0	403	0	155	108	296	0	437
chr10.83194830.G.A	na	na	NoRepeat	0	357	0	402	0	401	6	319	0	355	0	211	0	185	0	226	0	242
chr15.84537812.C.G	na	na	NoRepeat	1	126	24	262	0	426	0	343	0	215	0	260	0	163	0	151	0	197
chr4.150489567.G.T	na	na	NoRepeat	0	268	0	378	0	548	88	613	0	334	2	351	0	149	0	289	0	340
chr5.101512214.T.C	na	na	NoRepeat	0	539	3	543	0	695	0	584	0	646	112	407	0	237	0	309	0	467
chr13.63783589.G.A	na	na	NoRepeat	0	409	103	713	241	822	167	548	18	616	136	485	93	302	174	541	202	581
chr12.65887192.G.A	na	na	NoRepeat	0	163	1	237	0	220	0	152	15	215	0	158	0	89	45	224	34	148
chr1.183894783.G.T	na	na	NoRepeat	0	440	1	477	0	720	70	525	0	460	0	565	0	258	2	647	0	511
chr10.705356.C.T	na	na	NoRepeat	1	186	23	213	0	338	0	284	0	224	0	181	0	69	0	118	0	156
chr13.83074992.A.G	na	na	NoRepeat	0	308	0	365	126	441	0	321	0	333	0	268	0	136	1	264	0	288
chr3.165533120.G.A	na	na	NoRepeat	1	332	0	700	145	706	0	645	0	522	0	628	0	362	0	640	0	854
chr1.16813191.G.A	na	na	NoRepeat	0	64	0	91	0	114	22	84	0	83	0	119	0	28	0	64	0	60
chr8.96618571.T.C	na	na	NoRepeat	0	227	47	447	0	659	0	462	0	235	93	428	20	181	0	367	0	260
chr4.109025926.T.A	na	na	NoRepeat	2	250	46	334	115	361	94	391	10	285	54	251	52	172	82	177	58	230
chr2.191709562.G.C	na	na	NoRepeat	0	145	0	227	0	242	0	162	0	197	0	210	0	68	0	121	39	191
chr3.135464015.C.T	na	na	NoRepeat	0	483	76	581	0	498	0	549	25	494	118	524	63	260	114	547	96	483
chr14.61468962.G.T	na	na	NoRepeat	0	280	26	316	0	657	0	363	0	261	58	221	37	96	1	232	0	223
chr13.57812044.A.T	na	na	NoRepeat	0	228	0	339	0	377	0	285	0	278	0	289	0	138	0	307	73	250
chr2.118607334.A.T	na	na	NoRepeat	0	420	21	401	1	405	0	342	0	376	0	392	0	130	0	349	0	380
chr2.222837118.G.A	na	na	NoRepeat	0	365	0	571	0	458	86	458	0	485	0	530	0	204	0	386	0	542
chr2.4888896.T.C	na	na	NoRepeat	1	227	0	333	0	324	0	226	0	224	0	238	0	102	0	227	60	204
chr14.26905017.G.A	na	na	NoRepeat	0	195	0	486	121	817	89	519	0	284	0	458	0	253	1	549	0	578
chr5.124621942.A.G	na	na	chr5_124621799_124622338	0	182	0	223	0	256	0	218	0	198	1	248	21	136	0	223	0	238
chr13.98091930.G.A	na	na	NoRepeat	0	274	0	384	0	396	0	269	0	327	0	380	0	207	0	253	63	439
chrX.132363206.G.A	na	na	NoRepeat	0	595	0	437	0	430	0	329	43	530	0	230	0	95	143	147	0	185
chrX.63013587.C.A	na	na	NoRepeat	0	327	0	442	177	358	1	253	0	421	0	309	0	143	0	264	1	280
chr5.25166840.A.T	na	na	NoRepeat	0	375	0	523	0	616	49	349	0	344	0	401	0	311	4	739	0	533
chr4.58282835.C.T	na	na	NoRepeat	0	225	0	348	0	291	0	270	0	239	0	280	0	177	0	259	56	322
chr1.81948311.T.A	na	na	NoRepeat	0	209	0	352	0	398	0	260	0	275	0	362	0	197	0	335	53	351
chr3.19707970.A.T	na	na	NoRepeat	0	278	0	478	112	339	0	289	0	325	0	365	0	220	0	407	0	481
chr4.115785271.A.C	na	na	NoRepeat	0	165	0	244	0	260	29	232	1	247	1	167	0	132	2	212	0	248
chr7.53124866.G.A	na	na	NoRepeat	0	258	26	322	0	252	0	247	23	242	57	244	26	137	122	240	70	249
chr1.1760815.C.A	na	na	NoRepeat	0	268	0	334	0	376	47	195	0	252	1	334	0	118	1	276	0	211
chr17.69247572.A.T	na	na	chr17_69247523_69247921	0	202	0	415	108	531	0	399	0	287	0	386	0	148	0	406	0	391
chr13.107073407.A.T	na	na	NoRepeat	0	298	20	396	0	363	0	284	9	328	54	336	42	176	81	246	72	460
chr5.9893873.A.C	na	na	NoRepeat	0	265	6	410	0	450	0	282	0	276	62	397	0	191	0	480	0	235
chr7.20382666.A.T	na	na	NoRepeat	0	182	10	283	0	232	0	183	0	228	47	225	20	93	1	221	0	238
chr2.133705187.C.G	na	na	NoRepeat	0	276	24	397	0	458	0	354	0	394	53	380	14	120	5	307	0	437
chr3.155303438.G.A	na	na	NoRepeat	0	255	0	284	0	467	0	347	10	293	0	202	0	117	61	221	57	223
chr13.48321228.C.A	na	na	NoRepeat	0	497	0	852	239	726	3	611	0	620	0	648	0	349	0	691	0	721
chr2.50362976.T.C	na	na	NoRepeat	0	445	0	638	392	798	0	641	0	486	0	523	0	261	0	385	0	470
chr7.146166108.A.T	na	na	NoRepeat	0	378	41	477	0	518	0	366	0	444	95	489	52	227	2	303	0	465
chr21.31508152.C.T	na	na	NoRepeat	0	321	0	344	85	389	56	305	0	260	0	296	0	136	0	269	0	292
chr17.38499893.G.T	na	na	NoRepeat	0	103	13	197	0	211	0	127	0	179	0	137	1	41	0	60	0	76
chr8.108167257.C.G	na	na	NoRepeat	0	478	36	1015	0	1704	0	1194	0	701	128	1179	58	524	2	894	0	658
chr11.106596507.A.G	na	na	NoRepeat	0	407	5	557	0	468	0	391	0	376	0	423	0	217	0	217	97	424
chr7.124964235.T.A	na	na	NoRepeat	0	229	62	287	119	338	72	246	22	257	99	274	58	150	132	204	130	304
chr4.69008089.C.G	na	na	NoRepeat	0	200	0	408	0	399	1	378	0	292	0	334	0	215	0	384	98	521
chr6.17847531.T.A	na	na	NoRepeat	0	220	0	305	0	337	75	252	0	302	0	319	0	139	0	294	0	308
chr5.20439458.G.A	na	na	NoRepeat	0	256	23	416	1	424	0	252	0	260	54	328	40	191	63	508	82	263
chr8.63964087.A.T	na	na	NoRepeat	1	368	0	319	101	375	0	310	0	321	0	365	0	122	0	214	0	231
chr1.7521932.G.C	na	na	NoRepeat	0	162	0	215	0	234	27	198	0	218	0	275	0	66	0	97	0	80
chr3.55383417.T.C	na	na	NoRepeat	0	322	0	495	0	533	0	386	19	512	1	327	0	218	112	421	0	371
chr16.78411493.A.G	na	na	NoRepeat	0	227	77	308	163	408	165	379	20	234	172	339	64	145	122	198	130	382
chr18.30134141.G.T	na	na	NoRepeat	0	89	0	132	46	151	0	132	0	126	0	87	0	42	0	95	0	72
chr6.148366977.G.C	na	na	NoRepeat	1	298	0	377	0	354	0	236	0	269	49	338	0	174	0	260	0	303
chr2.70700122.G.C	na	na	NoRepeat	0	172	0	327	67	372	0	301	0	292	0	267	1	115	0	179	0	148
chr20.30263372.G.T	na	na	NoRepeat	0	275	83	457	146	398	103	288	20	447	165	523	29	126	86	321	131	399
chr11.43093554.G.T	na	na	NoRepeat	0	339	0	303	0	375	8	254	0	303	0	229	0	140	1	274	0	247
chr21.39782492.G.A	na	na	NoRepeat	0	354	26	757	0	861	1	644	0	514	121	774	53	313	2	596	120	801
chr14.47425821.G.T	na	na	NoRepeat	0	192	2	266	0	271	0	173	3	167	0	328	0	174	25	301	27	345
chr4.169443951.G.C	na	na	NoRepeat	0	199	0	234	0	383	0	555	10	249	0	226	0	86	46	169	35	203
chr1.85457513.T.C	na	na	NoRepeat	0	149	16	223	0	284	0	221	0	171	27	244	0	101	0	281	0	233
chr11.58813028.G.C	na	na	NoRepeat	0	432	0	672	0	737	117	510	0	518	0	716	0	273	0	823	0	665
chr11.5621381.A.G	na	na	NoRepeat	0	258	4	252	1	248	0	204	0	244	57	218	0	91	0	139	0	180
chr13.45376966.G.A	na	na	NoRepeat	0	242	26	338	0	335	0	326	0	367	65	331	20	139	1	299	0	286
chr4.59183337.A.C	na	na	NoRepeat	0	148	0	247	0	217	0	217	0	183	0	180	0	122	0	165	40	229
chr4.13662320.C.A	na	na	NoRepeat	0	342	2	573	0	680	0	490	19	379	1	492	1	201	90	601	0	673
chr14.48295442.C.G	na	na	NoRepeat	1	289	10	539	0	618	0	384	9	357	0	677	0	324	84	576	65	556
chr6.94031524.T.A	na	na	NoRepeat	0	216	1	265	85	313	0	239	0	211	0	183	0	97	0	75	0	167
chr12.97232000.T.A	na	na	NoRepeat	0	231	0	403	118	471	0	368	1	371	0	286	0	180	0	402	0	289
chr5.173838296.G.T	na	na	chr5_173838193_173838540	0	435	18	463	1	452	0	486	15	396	89	487	37	225	93	391	72	424
chr15.24851409.C.A	na	na	NoRepeat	0	319	0	640	0	328	0	334	0	375	0	500	0	221	0	427	86	361
chr4.1980291.C.G	na	na	NoRepeat	0	95	0	208	66	319	0	171	0	211	0	216	0	47	0	115	0	161
chr11.60293314.A.C	na	na	NoRepeat	0	355	19	500	0	647	0	520	0	432	69	610	47	314	1	626	0	508
chr7.103031836.G.C	na	na	chr7_103031839_103031980	0	248	0	387	0	367	0	238	0	253	1	303	0	149	1	247	66	317
chr14.104540839.T.A	na	na	NoRepeat	0	416	1	525	90	528	0	511	0	490	0	652	0	217	0	550	0	620
chr1.79622192.T.C	na	na	NoRepeat	1	856	22	1101	1	1137	0	845	0	886	121	1053	52	524	0	1173	0	1144
chr2.79471153.G.T	na	na	NoRepeat	2	551	29	728	1	737	0	857	0	620	99	583	80	351	0	556	0	533
chr20.20782195.C.T	na	na	NoRepeat	1	400	0	574	0	634	0	491	0	446	1	617	0	271	0	378	83	458
chr11.49876931.C.A	na	na	NoRepeat	0	183	75	193	49	150	53	122	13	209	126	162	53	83	85	88	69	81
chr4.11791289.A.C	na	na	NoRepeat	0	471	2	785	0	763	0	747	0	528	0	788	24	343	0	730	0	987
chr12.44590608.T.A	na	na	NoRepeat	0	171	0	182	0	380	0	186	0	192	0	140	0	80	0	136	70	156
chr2.59847384.G.C	na	na	NoRepeat	0	207	1	310	0	457	0	343	0	266	1	287	19	121	0	212	0	235
chr9.103597037.C.G	na	na	NoRepeat	0	150	0	241	0	250	0	264	0	195	0	201	0	131	0	249	65	228
chr13.68295603.T.C	na	na	NoRepeat	1	615	0	864	0	1044	0	780	0	827	10	749	92	390	0	790	0	797
chr1.36999510.G.A	na	na	NoRepeat	0	214	26	346	0	453	1	341	25	359	102	308	31	124	62	265	35	197
chr3.167080625.C.T	na	na	NoRepeat	0	267	1	473	151	629	0	521	0	391	0	407	0	254	0	478	1	474
chr16.28644599.C.T	na	na	NoRepeat	0	206	0	262	0	239	0	219	1	220	0	246	0	92	0	213	47	334
chr8.4972605.A.C	na	na	NoRepeat	0	245	13	622	0	588	0	280	0	351	37	638	36	406	0	757	0	667
chr13.89898054.A.C	na	na	NoRepeat	0	240	44	295	85	323	57	251	14	258	34	191	30	123	69	234	66	221
chr4.721937.G.T	na	na	NoRepeat	0	157	0	185	0	183	0	123	0	208	0	146	0	39	53	100	0	112
chr8.39673119.T.C	na	na	NoRepeat	0	369	167	729	237	1096	138	860	13	536	118	413	128	294	144	725	150	686
chr4.16059710.T.C	na	na	NoRepeat	0	235	0	334	0	306	37	194	0	256	0	285	0	108	0	231	0	303
chr8.53475052.G.A	na	na	NoRepeat	1	288	0	357	104	442	1	366	0	341	0	412	0	167	0	333	0	400
chr2.97668091.C.T	na	na	NoRepeat	0	231	0	275	0	298	30	312	0	233	0	277	0	80	0	213	0	238
chr15.35822190.T.A	na	na	NoRepeat	0	393	0	453	98	338	0	371	0	343	0	390	0	147	0	388	0	354
chr14.80436885.A.G	na	na	chr14_80436569_80436926	0	396	0	408	125	1561	0	1170	1	359	0	334	0	163	0	338	0	352
chr4.15203765.C.T	na	na	NoRepeat	1	460	44	587	0	699	0	615	22	501	112	558	50	208	256	725	97	695
chr3.34481154.G.T	na	na	NoRepeat	0	339	0	551	0	615	0	522	20	355	0	351	0	220	112	244	0	422
chr7.148653531.A.C	na	na	NoRepeat	2	271	0	381	0	359	0	254	0	294	0	335	0	129	0	174	58	270
chr1.12824345.G.A	na	na	NoRepeat	0	122	13	227	0	309	0	183	9	203	31	236	15	96	44	204	31	170
chr12.105100588.G.A	na	na	NoRepeat	0	101	11	185	0	158	0	92	0	166	32	106	6	37	0	99	0	81
chr1.239340010.A.T	na	na	NoRepeat	0	388	22	397	0	354	0	368	0	360	0	264	0	158	0	201	0	260
chr16.7527208.T.G	na	na	chr16_7527212_7527375	0	356	0	496	211	618	130	436	0	419	0	475	1	240	0	371	0	601
chr17.11278291.A.T	na	na	NoRepeat	0	408	0	423	0	657	81	452	0	395	0	370	0	177	0	511	0	340
chr8.101447623.G.C	na	na	NoRepeat	0	240	0	367	0	447	50	396	0	225	0	405	0	110	0	349	0	205
chr6.78928626.G.A	na	na	NoRepeat	0	216	15	230	0	228	0	222	0	255	0	174	0	81	1	173	0	161
chr12.42161403.A.G	na	na	NoRepeat	0	428	25	413	2	587	0	406	17	402	99	271	47	143	132	264	93	225
chr4.13891230.C.A	na	na	NoRepeat	0	367	61	525	0	616	0	498	11	413	75	500	51	244	121	580	167	610
chr2.233512177.G.C	na	na	NoRepeat	0	85	0	157	0	89	0	103	0	135	0	131	0	24	0	72	17	104
chr2.36722754.G.T	na	na	NoRepeat	0	213	0	243	0	391	0	243	0	188	5	222	19	108	0	197	0	161
chr17.77405888.G.T	na	na	NoRepeat	0	123	0	143	42	208	0	150	0	142	0	159	0	50	0	107	0	132
chr12.73054770.G.T	na	na	NoRepeat	1	277	0	359	0	334	0	288	0	285	0	248	0	130	0	364	83	269
chr18.29146714.C.A	na	na	NoRepeat	0	196	0	192	0	312	0	211	0	210	1	128	0	86	0	106	41	118
chr4.105136659.A.T	na	na	NoRepeat	1	965	0	921	0	960	1	973	48	832	3	699	0	366	201	455	0	755
chr9.76586941.C.G	na	na	NoRepeat	0	282	0	462	0	493	101	498	0	377	0	368	0	201	0	542	0	455
chr4.99166564.C.A	na	na	NoRepeat	0	450	33	592	0	647	0	687	0	460	0	454	0	226	0	272	0	470
chr17.59369410.G.A	na	na	chr17_59369261_59369536	1	329	0	588	1	741	1	519	0	449	0	432	0	196	0	407	63	458
chr10.9766431.G.T	na	na	NoRepeat	0	52	1	74	0	81	0	73	0	46	9	28	0	32	0	36	0	45
chr13.71465477.A.G	na	na	V$S8_01	0	85	0	170	1	175	0	124	4	129	0	124	0	79	37	118	0	124
chr20.59448196.G.A	na	na	NoRepeat	0	278	175	664	0	982	0	662	18	363	218	646	95	262	150	473	201	614
chr6.16523220.T.C	na	na	NoRepeat	0	572	0	551	0	623	0	512	23	552	0	548	0	258	94	440	0	530
chr2.59465291.A.T	na	na	NoRepeat	1	313	1	423	93	422	1	434	1	289	2	310	1	165	1	224	0	260
chr5.92943821.C.T	na	na	chr5_92943646_92943819	0	414	0	374	6	364	0	282	0	348	0	314	0	81	0	156	0	202
chr2.195241870.A.G	na	na	NoRepeat	0	260	58	478	0	486	0	331	13	313	71	377	38	196	108	314	105	440
chr4.22549472.C.T	na	na	NoRepeat	0	259	34	356	0	479	1	387	0	290	0	353	0	151	0	324	0	427
chr1.98607554.T.A	na	na	NoRepeat	0	260	69	388	109	406	64	302	26	247	148	368	67	195	167	410	142	403
chr9.18128121.A.T	na	na	NoRepeat	0	459	43	447	0	515	0	512	0	461	0	320	0	138	0	411	0	278
chr3.59985881.C.T	na	na	NoRepeat	0	195	1	174	0	161	0	93	11	170	0	121	0	69	46	108	32	86
chr16.46579733.A.T	na	na	NoRepeat	0	229	1	260	93	289	0	230	0	216	0	194	0	145	0	221	0	224
chr6.74755467.A.T	na	na	NoRepeat	0	296	0	381	184	587	0	405	0	380	0	227	0	152	0	348	0	278
chr20.16339747.T.C	na	na	NoRepeat	0	210	18	428	0	383	2	337	0	261	72	471	0	193	2	265	49	404
chr9.26413943.G.A	na	na	chr9_26413546_26413993	1	597	0	457	0	604	0	557	0	482	0	263	0	200	0	426	102	264
chr11.117649616.G.T	na	na	NoRepeat	0	114	0	163	0	169	0	167	0	144	3	151	11	41	0	71	1	134
chr20.48265469.C.T	na	na	NoRepeat	0	220	0	441	0	333	0	252	0	299	1	568	0	229	71	356	0	477
chr1.218568438.G.T	na	na	NoRepeat	0	293	77	253	7	200	69	233	30	240	52	175	26	60	183	249	86	99
chr14.77489402.A.T	na	na	V$BACH1_01	0	275	5	333	0	903	0	718	22	329	1	294	0	102	55	228	44	166
chr16.52182575.G.T	na	na	NoRepeat	0	220	0	277	88	260	0	220	0	219	0	236	0	96	2	199	2	182
chr11.106252321.T.C	na	na	NoRepeat	0	270	0	457	18	620	99	413	0	340	0	411	0	166	0	223	0	387
chr1.167171384.G.A	na	na	NoRepeat	0	424	0	528	116	527	0	510	0	474	1	523	0	243	0	523	0	510
chr1.162178784.C.G	na	na	NoRepeat	0	262	0	502	156	631	0	517	0	448	0	586	0	240	0	639	0	537
chr21.19738490.A.G	na	na	NoRepeat	0	156	1	203	0	323	0	250	7	182	0	190	0	120	31	155	26	195
chrX.29361017.C.A	na	na	V$MIF1_01	0	453	0	428	0	408	0	297	22	433	0	182	0	140	106	231	1	236
chr15.36265966.G.A	na	na	chr15_36265588_36266088	0	489	0	695	0	620	0	590	14	523	0	593	0	208	116	500	0	515
chr14.75655948.A.T	na	na	NoRepeat	0	217	61	226	264	465	159	325	42	263	94	208	40	88	115	180	80	150
chr5.92066502.A.G	na	na	NoRepeat	0	285	0	392	0	446	80	318	0	329	0	287	0	160	0	243	0	284
chr5.121150534.A.G	na	na	NoRepeat	0	385	29	545	0	750	0	573	0	455	91	549	39	249	0	530	0	612
chr7.7870406.T.G	na	na	NoRepeat	0	277	7	399	0	353	0	268	0	322	53	290	0	171	0	354	0	269
chr3.95341340.G.T	na	na	NoRepeat	0	321	0	436	0	584	0	302	17	384	0	292	1	155	92	431	0	464
chr7.31391411.A.C	na	na	NoRepeat	0	261	89	340	0	330	0	240	26	280	130	294	53	157	131	283	124	267
chr10.87523257.A.C	na	na	NoRepeat	0	209	3	233	0	286	0	217	0	235	64	162	0	78	0	129	0	105
chr4.177726473.G.T	na	na	NoRepeat	0	424	0	414	0	396	114	658	0	353	0	388	0	193	1	332	0	337
chr2.66923169.A.T	na	na	NoRepeat	0	324	26	422	0	496	0	426	0	335	73	355	26	179	1	264	58	247
chr3.81327143.T.G	na	na	NoRepeat	0	379	12	405	0	396	0	300	0	463	79	260	46	134	1	290	0	281
chr7.50735086.C.T	na	na	NoRepeat	0	231	0	415	0	408	68	320	0	374	0	362	0	143	0	256	0	275
chr7.53186987.A.T	na	na	NoRepeat	0	187	0	310	0	331	74	228	0	229	0	274	0	149	0	260	0	293
chr3.184526712.T.A	na	na	NoRepeat	0	215	0	268	0	331	55	347	1	283	0	242	0	134	0	262	0	289
chrX.139146036.C.T	na	na	NoRepeat	0	521	93	438	231	473	174	373	32	538	123	225	65	123	151	159	111	148
chr20.40833060.A.T	na	na	NoRepeat	0	325	0	709	0	607	0	455	0	435	0	776	0	361	0	620	96	845
chr6.99742544.T.A	na	na	NoRepeat	0	272	0	325	133	410	0	332	0	265	0	196	0	84	0	205	0	171
chr22.23250185.C.T	na	na	NoRepeat	0	345	0	340	0	374	0	280	1	317	0	358	0	130	0	224	33	247
chr1.83680360.C.T	na	na	NoRepeat	0	318	86	429	134	550	63	420	25	371	186	457	87	226	176	447	186	492
chr1.94048985.T.C	na	na	NoRepeat	0	225	0	394	0	550	0	322	0	378	0	382	30	163	0	320	0	329
chr3.137944370.C.T	na	na	NoRepeat	0	228	0	329	0	364	2	427	9	297	0	237	0	172	92	228	82	245
chr13.84530673.A.C	na	na	chr13_84530544_84530679	0	347	32	416	0	461	0	366	0	391	67	316	58	220	1	363	0	387
chr7.47827209.A.G	na	na	NoRepeat	0	175	15	272	0	343	0	260	0	283	48	264	30	158	0	364	0	282
chr4.37911226.T.C	na	na	NoRepeat	0	335	0	600	0	733	0	693	0	476	0	518	0	222	87	491	0	626
chr5.78110168.C.T	na	na	NoRepeat	0	215	12	246	0	312	0	217	0	232	50	240	0	114	0	136	0	173
chr8.105409829.T.A	na	na	NoRepeat	0	368	14	550	0	919	0	731	0	396	56	619	27	298	0	535	0	335
chr3.29977195.T.A	na	na	NoRepeat	0	209	0	247	0	258	0	238	0	185	0	172	0	102	0	112	46	157
chr8.101886300.A.G	na	na	NoRepeat	0	431	0	718	151	1171	140	917	0	517	0	879	0	380	0	532	0	482
chr2.81626798.T.A	na	na	NoRepeat	0	123	56	227	59	201	49	217	6	139	76	204	39	84	40	121	75	136
chr5.58295191.T.C	na	na	NoRepeat	0	252	0	316	129	400	0	332	0	293	0	243	0	107	0	192	0	228
chr1.5260437.C.T	na	na	NoRepeat	1	245	60	329	2	435	0	278	18	298	176	396	60	160	68	257	63	279
chr9.73444935.A.T	na	na	chr9_73444741_73444943	0	199	0	345	75	310	1	323	0	262	0	302	0	176	1	485	0	383
chr1.242348078.C.T	na	na	NoRepeat	0	201	0	342	0	190	0	148	8	233	0	282	1	92	55	176	0	256
chr15.78929914.G.C	na	na	NoRepeat	0	60	0	69	0	114	0	149	3	81	0	85	0	31	9	21	0	51
chr8.4584060.G.C	na	na	NoRepeat	0	192	1	459	0	385	0	183	19	227	1	421	0	213	46	391	45	384
chr12.58471628.T.C	na	na	NoRepeat	0	219	13	266	0	324	0	263	0	260	46	230	26	93	0	253	0	238
chr3.146493637.T.C	na	na	NoRepeat	0	172	16	199	0	242	0	249	16	182	51	192	25	101	58	154	55	207
chr3.127270156.T.C	na	na	NoRepeat	0	167	15	216	1	209	0	181	9	261	38	175	16	67	41	102	31	144
chr7.15836266.T.A	na	na	chr7_15836199_15836398	0	168	31	402	0	371	0	271	0	251	1	299	0	166	0	283	0	324
chr1.9262872.C.T	na	na	NoRepeat	0	136	0	141	59	196	0	164	0	153	0	190	0	76	0	120	0	100
chr5.17604018.A.G	na	na	NoRepeat	0	133	21	226	0	288	0	145	0	168	83	180	16	122	0	269	0	131
chr19.40405101.C.T	na	na	NoRepeat	0	153	0	203	64	153	0	154	0	174	0	202	0	54	1	81	0	142
chr2.211079455.T.A	na	na	NoRepeat	0	193	11	284	0	155	0	228	0	227	41	229	16	74	1	187	0	250
chr4.114032947.T.C	na	na	NoRepeat	0	205	33	356	0	421	0	425	15	282	75	294	33	136	112	353	114	369
chr18.46987609.T.C	na	na	NoRepeat	0	126	3	180	2	163	0	164	0	140	32	88	0	39	0	71	0	77
chr12.24518493.T.C	na	na	NoRepeat	0	120	0	170	40	237	29	120	0	155	0	165	0	120	0	152	0	159
chr5.154794476.C.T	na	na	NoRepeat	0	383	42	495	0	551	0	336	0	436	92	359	27	160	1	381	0	438
chr17.53743601.A.G	na	na	NoRepeat	2	418	0	566	2	766	0	577	18	412	0	512	0	195	79	486	0	527
chr5.31099811.T.A	na	na	NoRepeat	0	272	26	413	0	515	0	285	10	317	12	381	73	234	98	669	82	354
chr9.75687976.C.A	na	na	NoRepeat	0	393	0	635	0	651	98	675	0	490	0	578	0	385	0	1088	0	915
chr2.190978730.T.A	na	na	NoRepeat	0	231	0	273	0	279	48	227	0	269	0	263	0	94	0	209	0	282
chr13.104923988.T.C	na	na	NoRepeat	0	273	5	519	0	473	0	370	0	372	90	492	0	238	0	330	0	640
chr11.104497035.T.A	na	na	NoRepeat	0	248	33	356	0	557	0	504	0	280	0	296	0	142	0	188	0	338
chrX.125829934.A.T	na	na	NoRepeat	0	150	1	110	0	102	0	100	0	121	22	42	0	21	0	32	0	40
chr7.84597488.G.C	na	na	NoRepeat	0	379	0	569	0	504	114	385	0	492	0	680	0	367	0	683	0	663
chr19.9097924.T.A	na	na	NoRepeat	0	593	0	746	246	913	1	580	0	635	0	620	0	380	1	647	0	572
chr12.22430013.T.A	na	na	NoRepeat	0	478	4	432	1	739	0	524	58	569	2	321	0	169	165	465	120	409
chr11.87541644.T.C	na	na	NoRepeat	1	158	0	250	0	502	0	426	0	163	0	165	0	84	0	191	25	208
chr1.34205077.G.A	na	na	NoRepeat	0	207	0	273	92	404	0	281	0	268	0	308	0	125	0	232	0	249
chr7.18408191.C.A	na	na	NoRepeat	0	214	34	278	0	276	1	206	0	201	32	187	23	98	3	268	55	257
chr9.68460780.C.T	na	na	NoRepeat	0	349	15	402	0	377	0	437	0	377	0	377	0	186	0	395	0	433
chr8.121780292.T.C	na	na	NoRepeat	0	194	0	469	0	839	0	673	0	230	0	505	0	265	0	339	46	273
chr10.132831704.G.A	na	na	NoRepeat	0	137	0	153	57	156	0	131	0	131	0	85	0	45	0	97	0	90
chr9.7662921.T.C	na	na	NoRepeat	0	322	11	314	0	406	1	411	0	340	85	229	48	134	0	274	0	231
chr3.40986755.G.A	na	na	NoRepeat	0	180	15	357	0	444	0	340	0	332	54	230	34	149	0	416	0	263
chr14.26907791.T.C	na	na	NoRepeat	0	163	25	352	53	469	55	329	11	199	35	270	27	188	38	369	51	368
chr10.98425617.G.T	na	na	NoRepeat	0	309	26	392	0	624	0	387	21	404	72	231	46	221	98	216	114	217
chr3.164620109.T.C	na	na	NoRepeat	0	211	0	294	0	358	0	299	0	247	6	249	38	177	0	295	0	308
chr4.168389036.A.G	na	na	NoRepeat	0	196	0	266	87	441	0	658	0	220	0	245	1	125	0	211	0	239
chr4.46438210.A.T	na	na	NoRepeat	0	557	26	718	0	742	0	725	0	503	94	604	38	403	0	527	85	731
chr10.113244074.T.A	na	na	NoRepeat	0	482	0	485	0	590	11	382	0	471	0	288	0	191	0	375	0	390
chr2.79109521.C.T	na	na	NoRepeat	0	312	21	350	1	375	0	343	0	280	49	309	31	182	1	275	0	301
chr2.142259776.A.G	na	na	NoRepeat	0	251	3	411	0	341	0	271	0	300	62	305	0	122	0	219	0	373
chr8.104771110.G.T	na	na	NoRepeat	0	298	27	570	1	1003	0	692	12	393	68	663	34	285	104	687	92	416
chr8.84647878.C.T	na	na	NoRepeat	0	247	0	542	0	655	0	518	0	299	0	445	0	269	0	449	64	344
chr18.41158038.C.A	na	na	NoRepeat	0	323	0	335	121	447	0	319	0	271	0	209	0	98	0	205	0	212
chr6.17717672.T.C	na	na	NoRepeat	0	108	0	131	40	148	0	113	0	155	0	121	0	31	0	105	0	119
chr3.154145884.G.A	na	na	NoRepeat	0	103	0	192	61	169	0	190	0	126	0	128	0	69	0	118	0	137
chr10.126970886.A.C	na	na	NoRepeat	0	294	0	357	0	501	0	350	0	396	0	286	0	143	0	238	55	245
chr10.58347579.T.A	na	na	NoRepeat	0	134	0	240	0	334	0	290	6	173	0	147	0	109	41	173	0	193
chr11.32619276.A.T	na	na	NoRepeat	0	206	21	249	0	249	0	153	0	206	0	230	0	109	0	134	0	127
chr11.108465311.T.G	na	na	NoRepeat	0	142	0	141	0	205	0	164	13	106	0	144	0	61	24	60	0	96
chr8.130030011.G.A	na	na	NoRepeat	0	313	42	680	0	1190	0	905	0	367	0	818	0	409	0	475	0	402
chr8.137211715.T.G	na	na	NoRepeat	0	167	1	343	0	413	0	364	18	230	0	215	0	161	81	230	0	229
chr2.226836867.T.A	na	na	NoRepeat	0	1218	195	1653	0	1001	0	1252	68	1277	258	1296	78	525	318	1160	381	1545
chr15.47481631.A.G	na	na	V$ZIC2_01	0	223	29	416	0	329	0	351	0	286	0	354	0	102	1	233	0	296
chr4.80566531.G.A	na	na	NoRepeat	0	439	0	597	0	481	0	592	0	507	0	596	0	359	0	663	100	741
chr1.84785899.A.C	na	na	NoRepeat	1	385	112	522	144	603	72	387	49	477	204	476	68	185	215	577	202	511
chr2.44083200.G.T	na	na	NoRepeat	0	147	0	311	1	422	43	361	0	261	0	291	0	135	0	190	4	243
chr4.152875220.G.A	na	na	V$PAX3_01	0	275	0	447	156	822	0	703	0	430	1	380	0	145	0	285	0	353
chr17.33200894.C.T	na	na	NoRepeat	0	196	0	286	0	259	0	173	0	235	0	191	0	82	45	146	0	231
chr4.43883348.T.G	na	na	NoRepeat	0	175	1	539	0	661	0	468	13	295	1	512	1	287	87	404	0	608
chr4.62655577.G.T	na	na	chr4_62655540_62655717	0	206	0	310	0	310	76	302	0	230	0	300	0	186	0	261	0	382
chr4.30640925.T.A	na	na	NoRepeat	0	294	1	519	0	577	0	575	0	335	0	409	0	239	0	378	97	609
chr12.69931823.A.T	na	na	NoRepeat	0	170	0	247	0	291	0	219	0	212	0	149	0	92	0	233	66	205
chr18.37850844.A.T	na	na	NoRepeat	0	643	0	552	174	642	0	540	1	641	0	384	0	200	0	358	0	391
chr5.144019084.G.T	na	na	NoRepeat	1	526	144	651	271	792	199	636	38	585	209	451	150	273	216	617	284	751
chrX.5497136.C.A	na	na	NoRepeat	0	256	97	281	112	235	67	144	22	274	64	138	73	106	138	146	75	104
chr16.77473906.A.G	na	na	NoRepeat	0	419	2	561	0	605	0	433	25	502	0	582	0	226	118	248	0	493
chr17.72439487.G.T	na	na	NoRepeat	0	60	0	160	0	154	0	101	7	98	0	107	0	32	16	84	0	82
chr11.29913537.G.A	na	na	NoRepeat	0	253	13	342	0	321	0	260	0	254	0	291	0	183	0	236	0	199
chr12.32739180.T.G	na	na	NoRepeat	0	106	0	124	0	175	0	95	4	103	0	138	0	39	33	136	0	130
chr1.176308234.G.C	na	na	chr1_176308228_176308384	0	266	0	388	96	512	34	335	0	346	0	365	0	166	0	445	0	386
chr6.15573646.A.G	na	na	NoRepeat	0	173	0	196	0	236	26	166	0	198	0	206	0	102	0	181	0	187
chr4.20409860.G.A	na	na	NoRepeat	0	226	0	440	0	390	0	287	0	328	0	342	0	144	65	318	103	435
chr5.146956968.C.T	na	na	NoRepeat	0	359	0	508	1	602	151	473	0	460	0	388	0	179	0	417	0	483
chr17.67084007.T.G	na	na	NoRepeat	0	349	3	771	1	1087	0	783	18	600	0	647	0	327	151	829	0	790
chr15.71099671.C.A	na	na	NoRepeat	0	302	68	391	0	248	112	303	13	338	142	401	45	126	70	215	54	302
chr16.51436814.T.A	na	na	V$CDP_02	0	313	0	364	0	396	0	303	0	359	0	265	0	143	0	222	81	289
chr8.21493279.G.A	na	na	NoRepeat	0	411	697	1288	0	1166	0	550	314	794	937	1280	392	567	1289	1619	880	1178
chr21.32995851.G.T	na	na	NoRepeat	0	190	0	307	1	335	46	247	0	246	0	258	0	109	0	198	0	233
chr4.60357399.A.C	na	na	NoRepeat	0	252	48	373	1	356	0	314	8	248	54	296	38	208	73	311	77	395
chr4.16130655.T.C	na	na	NoRepeat	0	123	7	193	0	211	0	155	0	170	35	196	15	55	0	178	0	192
chr8.34530918.G.A	na	na	NoRepeat	0	288	0	539	156	658	0	565	0	351	0	319	0	234	0	503	1	519
chr1.221060003.A.G	na	na	NoRepeat	0	155	0	176	0	156	0	161	0	243	3	131	13	51	0	124	0	84
chr12.6483040.A.G	na	na	NoRepeat	0	102	0	142	39	224	0	143	0	149	0	93	0	31	0	41	0	56
chr4.163072801.G.T	na	na	NoRepeat	0	109	0	249	0	475	0	404	4	134	0	203	0	84	41	123	0	181
chr5.119268688.C.T	na	na	NoRepeat	0	284	0	493	0	532	22	393	0	389	0	391	0	202	0	380	0	463
chr12.119982614.C.A	na	na	NoRepeat	0	360	25	447	1	461	0	426	0	479	78	310	32	158	1	390	0	393
chr2.18590749.G.A	na	na	NoRepeat	0	342	8	550	0	524	0	440	43	471	0	413	0	271	131	424	0	415
chr1.74776823.T.C	na	na	NoRepeat	0	256	0	391	0	436	0	358	7	254	0	387	0	227	66	394	0	449
chr12.56099911.C.A	na	na	V$NKX61_01	0	205	9	221	0	278	0	216	0	278	0	245	0	78	0	149	0	116
chr3.150419214.C.A	na	na	NoRepeat	0	651	0	741	245	872	0	1078	0	702	0	605	0	377	0	622	2	641
chr15.88259046.A.G	na	na	NoRepeat	0	303	0	710	0	657	89	463	0	404	0	509	0	190	0	217	0	311
chr4.6510856.C.A	na	na	NoRepeat	0	184	10	180	0	157	0	156	0	167	25	134	14	39	0	141	0	195
chr7.126295991.A.T	na	na	NoRepeat	0	203	1	333	0	305	0	266	0	270	0	299	0	162	0	241	78	344
chr7.69327621.A.T	na	na	NoRepeat	0	392	0	549	0	600	118	362	0	493	0	498	0	247	0	366	0	485
chr13.71571068.A.T	na	na	NoRepeat	0	169	43	170	62	171	29	121	15	135	57	120	40	78	56	98	72	132
chr11.99637653.T.C	na	na	NoRepeat	0	370	0	595	0	652	0	664	0	404	0	391	0	192	0	269	81	490
chr6.147070518.C.A	na	na	NoRepeat	0	200	0	326	0	426	0	242	0	215	0	235	0	117	0	201	57	265
chr12.30992355.T.A	na	na	NoRepeat	0	212	23	258	0	423	0	241	15	298	60	311	23	111	61	240	65	246
chr18.70853039.G.A	na	na	NoRepeat	0	273	0	407	109	499	0	344	1	369	0	248	0	140	0	228	0	281
chr16.71292690.G.T	na	na	NoRepeat	1	249	0	415	0	529	84	390	0	333	0	439	0	242	0	261	0	511
chr10.63728514.T.C	na	na	NoRepeat	0	225	0	293	0	535	58	404	0	281	0	173	0	110	0	145	1	139
chr20.19971194.A.T	na	na	NoRepeat	0	263	0	520	142	584	0	386	0	435	0	424	0	202	0	262	0	377
chr14.48417004.T.A	na	na	NoRepeat	0	253	0	494	128	561	0	340	0	318	0	497	0	301	0	576	0	643
chr4.28639888.T.A	na	na	NoRepeat	1	215	0	337	0	421	0	405	0	246	0	252	0	137	78	269	0	428
chr1.158875403.G.T	na	na	NoRepeat	0	447	8	763	0	748	2	721	0	583	104	677	46	338	0	983	0	849
chr2.29659132.T.C	na	na	NoRepeat	0	240	0	316	189	422	0	383	1	275	0	340	0	140	0	172	0	173
chr2.215375523.C.T	na	na	NoRepeat	0	151	0	218	0	165	0	179	0	150	0	197	0	94	0	155	32	168
chr16.54142119.C.G	na	na	NoRepeat	0	335	0	472	0	568	0	385	0	481	0	398	0	158	80	325	0	288
chr8.109584782.C.G	na	na	NoRepeat	0	137	0	245	0	384	25	280	0	148	0	285	0	99	0	160	0	129
chr9.101714761.A.T	na	na	NoRepeat	0	228	0	301	0	287	71	392	1	310	0	298	0	134	0	398	0	238
chr1.102297043.T.A	na	na	NoRepeat	0	179	50	291	0	347	0	238	11	207	49	261	17	111	56	284	51	303
chrX.31944265.C.T	na	na	NoRepeat	1	633	0	633	0	597	0	493	33	659	0	255	0	306	184	390	0	530
chr13.41472262.G.C	na	na	NoRepeat	0	303	2	425	0	442	0	343	0	383	60	394	0	205	0	393	0	385
chr7.31273116.A.G	na	na	chr7_31272922_31273346	0	417	29	562	0	619	0	452	0	484	125	569	67	302	0	537	0	515
chr3.29367445.T.A	na	na	NoRepeat	0	501	0	624	0	579	0	543	0	482	0	447	32	229	0	302	0	388
chr8.116171954.T.C	na	na	NoRepeat	0	205	1	497	0	850	0	716	10	261	0	491	0	242	58	374	0	318
chr3.182912510.G.T	na	na	NoRepeat	0	654	0	707	0	873	2	834	28	659	0	591	1	279	138	587	0	663
chr10.91568137.C.T	na	na	NoRepeat	0	272	11	341	0	522	1	370	0	333	92	263	52	174	0	206	0	212
chr20.41381416.A.G	na	na	NoRepeat	0	211	0	487	0	388	0	265	0	360	0	607	32	331	0	425	0	568
chr6.139679469.C.T	na	na	NoRepeat	0	247	10	269	0	322	0	224	7	219	70	265	10	93	63	197	37	206
chr7.71213248.A.T	na	na	NoRepeat	0	275	0	380	111	392	0	320	0	335	0	314	0	128	0	213	0	308
chr3.5412035.A.G	na	na	NoRepeat	0	407	66	1088	0	946	1	697	0	607	0	814	0	515	2	1176	0	1076
chr2.77783566.A.G	na	na	NoRepeat	0	237	13	285	0	275	0	281	0	200	31	190	23	108	0	190	0	165
chr10.3570212.G.A	na	na	NoRepeat	0	184	93	378	352	1082	206	686	8	266	165	511	63	221	68	251	71	294
chr13.105250790.G.A	na	na	NoRepeat	0	302	0	438	119	404	0	372	0	358	0	448	0	241	0	327	0	637
chr12.16359948.G.T	na	na	chr12_16359797_16360222	0	600	0	727	4	1261	130	759	0	667	0	469	0	292	0	466	0	577
chr6.166237936.C.A	na	na	NoRepeat	0	203	1	256	0	387	0	232	0	217	0	293	0	130	0	76	34	205
chr5.34552921.C.T	na	na	NoRepeat	0	333	0	527	0	635	103	334	0	418	0	473	0	284	0	710	0	400
chr18.20776188.C.G	na	na	NoRepeat	0	104	0	193	0	158	0	116	0	142	0	156	0	46	0	116	23	140
chr14.106965379.G.T	na	na	NoRepeat	0	179	0	422	80	627	1	479	0	242	0	456	0	159	0	339	0	406
chr4.19962857.G.A	na	na	NoRepeat	0	341	36	476	139	504	128	386	0	395	88	408	0	175	79	462	116	542
chr7.146267053.C.T	na	na	chr7_146266928_146267083	0	113	0	177	48	195	0	123	0	152	0	174	0	90	0	135	0	192
chr10.73449186.G.T	na	na	NoRepeat	0	169	0	234	103	286	0	208	0	227	0	171	0	88	0	84	0	112
chr6.23269464.A.T	na	na	NoRepeat	0	391	0	673	164	766	0	554	1	552	0	693	0	395	0	918	0	671
chr3.18413794.G.A	na	na	NoRepeat	0	276	128	593	0	502	0	362	6	338	129	477	79	260	95	546	126	547
chr1.167243496.T.G	na	na	NoRepeat	0	415	0	718	0	976	142	788	0	582	0	719	0	386	0	896	0	691
chr15.99996350.G.A	na	na	NoRepeat	0	106	0	195	37	134	0	127	0	193	0	208	0	61	0	204	0	169
chr10.43456303.G.C	na	na	NoRepeat	0	41	29	134	0	241	0	165	11	114	33	90	24	54	34	79	39	95
chr20.24247951.C.A	na	na	NoRepeat	0	398	30	581	0	694	0	586	18	409	82	593	38	292	101	408	87	556
chr9.42476147.C.T	na	na	NoRepeat	0	270	2	322	0	305	0	386	0	274	14	319	8	160	0	320	0	308
chr3.3660949.G.A	na	na	NoRepeat	0	391	145	683	116	579	108	518	41	474	206	623	101	375	287	719	262	739
chr10.116753322.T.G	na	na	NoRepeat	0	269	2	348	0	454	0	312	0	361	1	246	43	151	0	329	0	302
chr8.1364318.T.A	na	na	NoRepeat	0	199	20	221	0	315	0	156	5	185	45	131	18	72	41	67	39	80
chr20.44909620.G.T	na	na	NoRepeat	1	779	107	1382	1	903	0	821	0	955	158	1727	49	482	150	979	189	1349
chr10.130284098.C.T	na	na	NoRepeat	0	128	6	127	0	147	0	113	0	144	0	103	0	43	0	73	0	92
chr11.82888714.A.C	na	na	NoRepeat	0	187	0	408	0	588	0	491	5	319	0	341	0	190	50	326	0	385
chr10.129814639.C.T	na	na	NoRepeat	0	161	0	174	0	192	0	156	3	190	0	152	0	72	27	118	0	118
chr6.47453914.G.A	na	na	NoRepeat	0	428	0	954	0	926	0	808	0	573	1	1277	0	687	0	839	103	873
chr21.20121149.G.A	na	na	NoRepeat	0	73	0	106	0	227	1	131	1	101	0	112	0	44	0	93	26	93
chr22.19345917.C.T	na	na	NoRepeat	0	42	0	61	0	63	22	59	0	56	0	59	0	23	0	46	0	49
chr4.162981027.G.A	na	na	NoRepeat	0	207	1	434	0	927	0	780	33	351	0	332	0	154	110	320	1	419
chr14.47328302.T.G	na	na	NoRepeat	0	470	0	838	0	784	0	538	21	592	0	797	0	417	122	897	1	918
chr6.94947118.G.T	na	na	NoRepeat	0	222	0	286	0	329	19	254	0	284	0	185	0	105	0	101	2	177
chr5.147293094.A.T	na	na	NoRepeat	1	302	0	330	0	341	52	279	0	310	0	238	0	120	0	252	0	321
chr1.177047051.C.A	na	na	V$IRF7_01	0	198	1	356	0	442	0	296	15	254	0	319	1	92	66	332	0	265
chr12.92911323.A.T	na	na	NoRepeat	0	316	28	400	2	459	0	291	21	337	76	302	29	134	94	381	77	237
chr1.187990757.C.T	na	na	NoRepeat	0	241	16	418	0	448	0	354	13	284	63	371	20	163	68	427	78	382
chr8.54629772.C.T	na	na	NoRepeat	0	86	0	263	75	323	0	224	1	195	0	266	0	85	0	130	0	140
chr2.156688124.A.T	na	na	NoRepeat	0	355	0	512	91	505	0	387	0	388	0	447	0	183	0	375	0	549
chr5.159310131.G.A	na	na	NoRepeat	0	276	0	370	0	331	59	260	0	335	0	270	0	140	3	296	0	300
chr3.165074008.A.C	na	na	NoRepeat	0	373	0	772	0	780	0	754	14	484	0	666	0	343	101	658	0	799
chr13.49772038.A.G	na	na	chr13_49771835_49772055	0	207	0	370	108	369	0	299	0	338	0	249	0	146	0	290	0	249
chr8.112747270.A.C	na	na	NoRepeat	0	333	21	531	0	622	0	550	0	339	81	574	40	263	0	258	0	330
chr5.40821604.A.G	na	na	NoRepeat	0	286	11	503	0	439	0	272	9	285	103	275	30	163	48	390	54	277
chr10.53688909.G.A	na	na	NoRepeat	0	368	0	545	157	912	1	604	0	347	0	418	0	238	0	475	0	516
chr13.108022663.T.C	na	na	NoRepeat	0	157	0	219	0	263	0	165	0	211	50	223	0	94	0	148	0	301
chr2.108553775.T.A	na	na	NoRepeat	0	296	0	563	0	621	0	604	24	483	0	520	0	185	91	461	0	582
chr8.122908928.C.G	na	na	NoRepeat	0	293	0	822	0	1494	110	1169	0	414	0	887	0	465	0	681	0	522
chr8.112121105.A.T	na	na	NoRepeat	0	330	0	460	114	960	1	630	0	348	0	624	0	272	0	292	0	332
chr1.14672768.G.C	na	na	NoRepeat	0	230	0	343	0	310	27	227	0	210	0	312	0	97	0	196	0	199
chr1.14798229.G.A	na	na	NoRepeat	0	313	0	451	0	554	63	413	0	360	0	550	0	213	0	383	0	323
chr10.23715716.T.A	na	na	NoRepeat	1	557	0	404	1	584	0	433	24	450	0	273	1	145	119	238	0	246
chr9.96057199.C.T	na	na	NoRepeat	0	42	0	84	0	77	12	83	0	73	0	66	0	49	0	106	0	88
chr9.12229572.T.C	na	na	NoRepeat	0	404	0	300	0	397	112	405	0	346	0	238	0	117	0	404	0	260
chr5.80399917.C.A	na	na	NoRepeat	1	640	0	646	0	834	185	679	0	699	0	605	0	279	0	408	0	559
chr5.112276799.A.G	na	na	NoRepeat	1	377	0	308	82	269	0	319	0	286	1	281	0	91	0	218	0	265
chr1.194665633.T.C	na	na	NoRepeat	0	190	0	271	0	345	0	233	0	203	0	313	0	141	0	359	51	313
chr8.53914579.G.A	na	na	NoRepeat	0	232	0	317	0	408	0	311	0	281	7	334	31	160	0	285	0	365
chr3.68308481.A.G	na	na	NoRepeat	1	358	0	342	95	205	0	177	0	283	0	220	0	111	0	186	0	180
chr12.23946456.T.A	na	na	NoRepeat	0	236	0	313	106	486	0	235	0	356	0	208	0	108	0	274	0	259
chr10.77226686.A.G	na	na	NoRepeat	0	481	0	555	0	673	1	497	23	545	0	371	0	189	105	211	0	246
chr8.5570872.G.T	na	na	NoRepeat	0	459	0	955	117	790	0	464	0	565	0	924	0	486	1	1051	0	921
chr6.99599343.A.T	na	na	NoRepeat	0	167	0	176	0	261	0	196	7	210	0	162	0	74	56	163	0	117
chr2.204548766.C.T	na	na	NoRepeat	0	275	5	458	0	327	0	331	0	449	85	410	0	122	0	350	0	383
chr11.122587888.G.A	na	na	NoRepeat	0	289	0	390	131	398	0	288	0	345	0	327	0	130	0	139	0	303
chr6.16280338.G.T	na	na	NoRepeat	2	680	0	752	0	751	0	621	0	865	0	692	1	268	0	579	124	570
chr4.90753389.T.C	na	na	NoRepeat	0	420	0	574	155	487	1	558	0	463	0	378	0	264	0	345	0	481
chr7.16795717.T.G	na	na	NoRepeat	0	232	0	278	0	271	0	230	0	258	0	240	0	122	0	241	60	222
chr8.16236107.C.G	na	na	NoRepeat	0	215	0	348	0	628	78	310	0	261	0	196	0	139	0	145	0	188
chr18.70117427.G.A	na	na	NoRepeat	0	312	16	229	0	291	0	266	0	245	50	145	27	76	0	115	0	163
chr20.59155630.G.C	na	na	NoRepeat	0	112	4	291	0	456	0	296	0	143	31	280	17	105	0	204	0	275
chr16.13143713.T.A	na	na	NoRepeat	0	638	207	606	173	513	136	460	101	547	322	524	97	210	406	419	329	593
chr3.22134325.A.T	na	na	NoRepeat	0	281	0	506	0	390	0	342	0	354	5	403	41	250	0	443	0	470
chr4.26203174.C.T	na	na	NoRepeat	0	398	0	470	0	448	69	473	0	337	0	417	0	119	0	471	0	580
chr8.141219669.T.A	na	na	chr8_141219549_141219883	0	300	6	529	0	710	0	540	0	439	88	434	51	229	0	257	0	256
chr13.69090172.A.G	na	na	NoRepeat	0	538	0	569	0	685	0	479	0	500	0	429	0	253	0	505	156	529
chr2.23165959.A.G	na	na	NoRepeat	0	106	2	171	0	221	0	133	0	95	1	125	2	63	0	96	23	108
chr14.29141428.A.G	na	na	NoRepeat	0	234	0	384	77	326	0	278	0	245	0	323	0	157	0	385	0	340
chr4.45766743.G.T	na	na	NoRepeat	0	295	24	588	0	818	1	683	13	286	43	498	24	380	63	400	70	550
chr15.42027041.A.G	na	na	NoRepeat	1	303	0	375	125	427	0	393	0	345	0	406	0	125	0	320	0	323
chr6.168523370.G.A	na	na	NoRepeat	0	175	0	227	0	195	28	86	0	191	0	230	0	69	0	62	0	167
chr11.82321195.A.T	na	na	NoRepeat	0	273	1	493	135	674	0	501	0	337	0	415	0	186	0	475	0	442
chr11.80527010.C.T	na	na	NoRepeat	1	213	56	476	79	530	82	466	54	361	80	435	39	241	226	635	133	532
chr4.92728277.T.C	na	na	V$CART1_01	0	336	120	503	131	447	119	443	27	360	90	305	81	205	208	332	187	456
chr16.88567696.G.T	na	na	NoRepeat	0	247	4	297	0	229	0	229	1	298	72	264	14	55	0	97	37	173
chr4.25160360.C.T	na	na	NoRepeat	0	327	0	505	0	644	0	508	21	338	0	501	0	250	90	525	0	681
chr2.83752067.A.G	na	na	NoRepeat	0	182	0	234	0	299	49	254	0	186	0	198	0	101	0	150	1	186
chr18.44832405.A.G	na	na	NoRepeat	0	212	0	324	0	370	0	267	12	324	0	201	0	103	86	162	0	186
chr1.82764327.G.A	na	na	NoRepeat	0	364	1	596	179	733	0	479	0	471	0	601	0	262	0	581	0	649
chr4.134444594.T.G	na	na	NoRepeat	0	254	0	323	87	289	67	284	0	231	0	271	0	102	0	205	0	348
chr13.97035005.G.A	na	na	NoRepeat	0	229	0	283	107	306	62	258	0	245	0	224	0	124	1	217	0	210
chr4.67462206.T.C	na	na	NoRepeat	0	150	12	298	0	304	0	243	1	184	41	251	21	107	0	213	63	288
chr4.162660738.T.A	na	na	NoRepeat	1	262	23	338	0	746	0	700	0	304	54	326	46	132	0	271	0	366
chr14.40990009.G.T	na	na	NoRepeat	0	198	0	271	67	256	0	197	0	216	0	261	0	118	0	313	0	303
chr15.38616542.A.T	na	na	NoRepeat	0	222	0	350	0	340	0	339	0	229	0	341	0	135	0	330	49	258
chr18.1947243.T.A	na	na	NoRepeat	0	336	0	605	0	789	99	791	0	477	0	398	0	192	0	378	0	450
chr6.90846013.T.C	na	na	NoRepeat	0	385	3	329	0	435	0	334	0	354	89	254	0	111	0	130	0	233
chr7.147957353.A.T	na	na	NoRepeat	0	116	0	137	0	130	47	108	0	108	0	149	0	73	0	87	0	124
chr11.80540161.C.T	na	na	NoRepeat	0	164	3	436	0	413	0	351	20	297	0	279	0	178	99	515	55	444
chr6.6289958.G.C	na	na	V$MEF2_03	0	390	210	503	362	597	218	388	76	477	306	410	195	253	444	445	401	438
chr1.5722838.C.A	na	na	NoRepeat	0	32	0	95	0	115	0	97	0	70	14	101	0	39	0	42	0	55
chr16.4183967.C.T	na	na	NoRepeat	0	160	0	196	81	228	0	126	0	176	0	195	0	46	0	114	0	163
chr3.34598563.G.C	na	na	NoRepeat	1	408	0	603	209	585	0	525	1	439	0	445	0	229	0	317	0	521
chr15.73625276.G.A	na	na	chr15_73625206_73625382	0	333	0	530	0	319	55	303	0	460	0	515	0	160	0	232	0	308
chrX.7352411.T.A	na	na	NoRepeat	1	166	2	216	0	221	0	139	9	226	0	94	0	70	61	117	0	91
chr21.39316215.T.G	na	na	NoRepeat	0	314	0	412	92	393	0	331	0	323	0	345	0	137	0	292	0	334
chr4.130341850.A.G	na	na	chr4_130341767_130342354	0	471	0	588	0	598	0	604	17	491	2	520	0	242	129	484	1	570
chr15.95740909.G.T	na	na	NoRepeat	0	205	0	332	0	228	29	222	0	249	0	298	0	145	0	265	0	327
chr7.53811085.T.A	na	na	NoRepeat	0	146	54	254	76	279	62	210	23	227	109	265	62	153	109	228	150	296
chr7.154691819.T.C	na	na	NoRepeat	0	144	0	220	0	234	0	178	0	229	33	256	0	56	0	105	0	116
chr5.98991474.T.C	na	na	NoRepeat	0	404	48	411	0	405	0	351	0	374	0	301	0	148	0	217	0	294
chr3.21554445.C.T	na	na	NoRepeat	0	295	0	446	0	344	0	270	18	370	0	349	0	180	121	355	0	465
chr16.52830372.C.A	na	na	chr16_52830313_52830421	0	286	1	332	0	337	1	287	1	357	0	306	0	152	0	297	72	249
chr19.28805933.C.G	na	na	NoRepeat	0	236	23	360	0	282	0	333	0	275	74	349	36	103	0	209	0	305
chr13.92530669.A.T	na	na	NoRepeat	0	200	43	317	102	382	97	279	15	280	72	246	56	160	110	330	95	286
chr2.224724264.A.G	na	na	NoRepeat	0	250	0	330	0	204	79	227	0	269	0	260	1	97	0	197	0	255
chr2.120219829.G.T	na	na	NoRepeat	0	217	0	380	0	370	0	268	42	347	0	350	0	95	71	282	0	301
chr8.4783599.T.C	na	na	NoRepeat	0	223	43	618	0	604	0	333	10	354	60	590	25	394	79	679	83	655
chr2.220135756.C.T	na	na	NoRepeat	0	363	1	363	0	258	69	257	0	403	0	373	0	97	0	220	0	254
chr8.143062067.G.C	na	na	NoRepeat	0	98	0	218	0	309	0	252	0	195	35	181	21	78	0	92	0	103
chr4.178781890.T.G	na	na	NoRepeat	0	366	22	475	0	430	0	634	0	377	74	379	27	140	0	280	0	443
chr2.140908770.C.T	na	na	NoRepeat	0	327	2	440	0	349	0	304	22	282	0	370	0	138	91	263	107	428
chr6.50532008.T.A	na	na	NoRepeat	0	335	0	537	140	409	0	313	0	410	1	629	0	377	0	571	0	563
chr12.107064685.C.A	na	na	NoRepeat	0	907	47	792	0	854	0	756	54	760	161	676	81	323	216	652	167	600
chr13.95233994.T.A	na	na	NoRepeat	0	270	0	298	0	301	70	244	0	267	0	226	0	132	0	240	0	212
chr6.52468151.G.T	na	na	NoRepeat	0	305	1	472	0	341	57	272	0	383	0	459	0	196	0	319	0	311
chr20.17478983.T.C	na	na	NoRepeat	0	182	10	173	0	253	0	141	0	184	41	192	0	64	0	140	32	164
chr16.55277872.T.A	na	na	NoRepeat	0	424	0	498	0	500	99	419	0	440	0	400	0	158	0	414	0	292
chr10.4080838.G.T	na	na	NoRepeat	0	306	0	391	0	842	100	566	0	318	0	395	0	159	0	250	0	308
chr6.42161985.A.T	na	na	NoRepeat	0	417	2	1008	0	1110	0	873	46	735	0	1343	0	472	186	924	0	815
chr11.134833903.G.T	na	na	NoRepeat	1	110	0	213	0	221	0	130	0	178	0	180	0	79	0	82	46	175
chr2.176475493.A.T	na	na	NoRepeat	1	404	0	567	0	493	98	397	0	478	0	487	0	158	0	348	0	474
chr10.88886290.C.G	na	na	NoRepeat	0	334	60	446	1	648	1	426	24	420	58	306	42	216	91	264	104	285
chr4.115747817.A.T	na	na	NoRepeat	0	349	17	382	0	455	0	493	17	353	72	306	57	216	101	342	134	461
chr16.8592691.A.C	na	na	NoRepeat	0	439	0	689	193	754	0	534	0	638	0	637	0	255	0	588	1	667
chr2.17461981.A.T	na	na	NoRepeat	0	150	11	272	0	298	0	227	14	203	58	220	16	84	53	166	0	166
chr12.75110100.A.T	na	na	NoRepeat	0	218	22	326	0	322	0	229	0	317	55	242	29	122	73	335	0	263
chr5.26637277.T.A	na	na	NoRepeat	0	550	50	672	0	805	0	485	0	548	0	637	0	397	0	1068	0	654
chr6.123034492.A.C	na	na	V$AP1_01	0	292	0	274	1	347	73	266	0	331	0	181	0	103	0	70	0	171
chr1.116256333.C.A	na	na	NoRepeat	0	187	0	356	0	383	53	322	0	287	1	358	0	126	0	295	0	302
chr4.23740246.A.T	na	na	NoRepeat	0	547	0	883	202	1143	0	920	0	642	0	897	0	417	0	943	0	1142
chr10.132641317.C.A	na	na	NoRepeat	0	30	0	47	0	61	14	31	0	36	0	37	0	19	0	27	0	32
chr13.51048526.T.A	na	na	NoRepeat	0	579	0	745	0	764	0	624	0	639	14	519	72	295	0	623	0	589
chr13.105258753.A.G	na	na	NoRepeat	0	195	0	279	79	297	0	243	0	206	0	255	0	108	0	162	0	370
chr20.57218008.G.T	na	na	NoRepeat	0	68	0	170	0	111	0	98	0	108	0	204	0	65	12	104	0	144
chr16.72381204.G.T	na	na	NoRepeat	0	352	82	460	0	500	0	428	0	397	191	431	107	229	0	279	292	542
chr14.28125024.T.A	na	na	NoRepeat	0	688	0	928	221	1477	1	1055	1	728	0	677	1	513	1	1006	0	940
chr4.176694911.A.T	na	na	V$RFX1_02	0	215	28	225	0	217	0	450	9	191	50	210	60	140	55	155	65	211
chr5.94359555.T.A	na	na	NoRepeat	0	396	29	459	0	476	0	396	0	361	85	336	44	163	1	222	0	325
chr20.40410060.C.T	na	na	NoRepeat	0	185	0	378	0	336	57	227	0	296	0	492	0	210	0	380	0	494
chr13.106754232.A.T	na	na	NoRepeat	0	265	0	357	0	395	0	298	0	366	0	385	21	127	0	264	0	469
chr18.71452801.C.A	na	na	NoRepeat	2	542	25	403	0	591	0	449	0	500	87	280	51	158	0	313	0	299
chr5.111142988.C.G	na	na	chr5_111142948_111143156	0	402	1	663	188	725	0	803	0	596	0	618	0	274	0	484	0	634
chr2.46343366.G.A	na	na	NoRepeat	0	117	0	187	0	400	0	200	15	171	0	173	0	71	29	95	0	117
chr12.40740523.T.C	na	na	chr12_40740504_40740775	0	222	0	259	80	396	0	233	0	237	0	146	0	88	0	146	0	153
chr3.5091943.T.C	na	na	NoRepeat	1	417	6	634	0	614	0	505	0	504	80	711	0	283	1	800	0	621
chr3.12389758.A.G	na	na	NoRepeat	0	260	122	686	120	569	111	440	18	459	166	766	87	393	99	811	186	774
chr1.178764457.G.A	na	na	NoRepeat	0	369	0	479	0	742	0	496	0	404	0	537	0	291	0	632	90	527
chr17.71631522.T.G	na	na	NoRepeat	0	155	13	241	0	338	0	271	0	207	35	269	25	95	0	173	0	194
chr11.133074444.C.A	na	na	NoRepeat	0	183	19	314	0	342	0	228	0	226	0	244	0	115	0	134	0	283
chr3.108430826.C.A	na	na	NoRepeat	0	314	0	326	0	178	0	220	0	263	0	262	0	166	0	265	85	285
chr6.161793462.A.T	na	na	NoRepeat	0	462	0	480	177	678	0	430	0	485	0	587	0	195	0	197	0	421
chr2.50304063.G.A	na	na	NoRepeat	0	204	0	244	119	272	0	220	0	176	0	220	0	90	0	139	0	188
chr7.31119300.C.T	na	na	NoRepeat	0	281	0	406	1	354	48	252	0	330	0	326	0	124	0	276	0	210
chr8.106749719.G.C	na	na	NoRepeat	0	333	0	670	0	907	90	681	0	434	0	661	0	271	0	655	0	422
chr14.82412865.T.C	na	na	NoRepeat	0	217	66	239	0	878	0	579	24	234	90	194	47	108	119	203	89	192
chr18.35337322.G.C	na	na	NoRepeat	0	302	3	321	0	360	0	301	8	311	0	201	0	115	66	160	76	178
chr16.59901564.A.T	na	na	NoRepeat	0	341	29	430	0	505	0	344	0	374	66	305	42	173	2	322	0	332
chr20.2238115.G.A	na	na	NoRepeat	0	181	1	261	0	227	43	191	0	165	0	279	0	99	0	178	1	219
chr4.106277686.T.A	na	na	NoRepeat	0	262	3	340	0	346	0	382	7	264	2	242	0	123	93	164	80	273
chr4.86003987.G.T	na	na	NoRepeat	0	171	0	278	1	276	0	253	0	206	0	208	20	103	0	166	0	240
chr13.110221084.G.A	na	na	NoRepeat	0	171	19	292	0	276	1	233	0	207	71	298	34	140	0	201	0	377
chr1.60734063.C.T	na	na	NoRepeat	0	336	0	476	144	526	0	353	0	382	0	419	0	205	0	433	0	506
chr18.70219669.C.A	na	na	NoRepeat	0	77	0	91	20	77	24	59	0	110	0	53	0	25	0	45	0	51
chr7.98151630.T.C	na	na	NoRepeat	0	199	0	368	0	323	0	203	6	258	0	274	0	99	53	174	0	229
chr17.50798613.T.G	na	na	NoRepeat	0	312	0	609	0	1619	0	1200	19	304	1	508	0	217	70	355	0	313
chr2.83804631.T.C	na	na	NoRepeat	0	393	46	593	0	655	1	604	0	408	0	456	0	229	0	376	0	382
chr2.177392619.C.T	na	na	V$IRF7_01	0	642	0	717	231	749	0	597	0	629	0	754	2	265	0	615	0	699
chr4.160143155.A.T	na	na	NoRepeat	0	255	0	394	3	1066	57	811	0	391	0	328	0	199	0	354	0	439
chr4.118336710.C.A	na	na	NoRepeat	0	290	59	401	119	370	108	409	7	333	94	326	46	167	89	300	73	357
chr7.15266348.A.T	na	na	NoRepeat	1	377	0	491	0	505	121	391	0	365	0	436	0	257	0	478	0	517
chr20.33335956.T.A	na	na	NoRepeat	0	297	3	480	0	424	0	255	22	354	0	692	0	287	73	450	65	519
chr5.4773562.T.A	na	na	NoRepeat	0	184	0	292	0	344	0	196	0	171	5	217	37	147	0	343	0	183
chr2.35021179.T.C	na	na	NoRepeat	0	201	0	159	0	178	45	194	0	181	0	158	0	92	0	130	0	125
chr12.102874653.T.A	na	na	chr12_102873809_102874681	0	366	18	437	0	397	0	306	0	371	58	315	37	156	0	399	0	308
chr10.8556565.T.A	na	na	chr10_8556120_8556914	0	82	0	102	43	131	33	91	0	98	0	70	0	23	0	43	0	41
chr8.138185572.C.T	na	na	NoRepeat	0	450	0	585	171	702	0	604	0	474	1	421	0	216	0	394	0	393
chr5.94599319.G.A	na	na	NoRepeat	0	163	0	253	107	348	0	232	0	268	0	184	0	105	0	125	0	166
chr14.20746847.T.A	na	na	NoRepeat	2	261	0	534	2	428	101	270	0	375	1	454	1	181	1	448	1	592
chr1.164211666.A.C	na	na	NoRepeat	0	292	2	336	0	347	0	311	12	255	0	270	0	135	52	309	52	253
chr12.13753361.G.T	na	na	NoRepeat	1	421	24	426	0	727	0	397	0	463	1	259	0	111	0	244	0	200
chrX.85994737.C.G	na	na	chrX_85994689_85994936	0	169	65	204	100	203	52	118	13	225	85	132	65	82	114	117	100	130
chr1.234967623.A.G	na	na	NoRepeat	0	215	4	252	0	216	0	176	19	267	0	273	0	106	72	187	0	174
chr8.100715681.T.C	na	na	NoRepeat	0	347	31	915	2	1495	0	1031	24	582	131	952	45	494	137	792	132	608
chr10.83244036.G.A	na	na	chr10_83244037_83244149	0	388	24	476	0	521	0	411	22	386	95	258	48	181	118	234	124	288
chr2.160652482.C.T	na	na	NoRepeat	0	358	111	463	148	481	107	382	18	404	184	443	46	146	101	332	150	389
chr10.19719656.A.C	na	na	NoRepeat	0	323	0	340	0	400	0	325	0	273	6	215	33	92	0	199	0	207
chr4.7523979.T.A	na	na	chr4_7523988_7524150	0	212	0	388	82	338	0	346	0	332	0	397	0	92	0	193	0	270
chr12.46339919.C.T	na	na	NoRepeat	0	160	0	152	42	275	0	125	0	151	0	108	0	59	0	99	0	114
chr13.114598590.C.T	na	na	NoRepeat	0	162	0	235	0	238	0	164	8	211	0	230	0	106	40	137	0	284
chr8.123685271.G.A	na	na	NoRepeat	0	416	32	973	0	1799	0	1376	1	549	190	1061	42	446	1	788	0	595
chr4.129866495.C.T	na	na	NoRepeat	1	310	1	417	0	407	0	334	1	301	3	308	37	150	0	262	1	365
chr13.36705997.C.A	na	na	NoRepeat	0	76	0	166	0	152	44	129	0	136	0	134	0	64	0	132	0	124
chr3.18386813.A.T	na	na	chr3_18386812_18387097	1	392	349	781	322	651	236	535	84	444	395	649	285	429	519	629	505	771
chr4.44211841.C.A	na	na	NoRepeat	0	200	10	357	0	438	0	326	10	242	43	375	25	160	44	260	52	427
chr1.210306509.G.A	na	na	NoRepeat	1	305	0	374	121	392	0	245	0	315	0	172	0	95	0	411	0	222
chr9.77291456.A.T	na	na	NoRepeat	0	237	26	400	0	358	0	461	0	342	0	345	0	161	0	493	0	442
chr19.12242510.A.C	na	na	NoRepeat	0	450	4	968	0	699	0	537	14	607	1	1018	0	577	79	1196	77	1090
chr18.65714822.C.T	na	na	NoRepeat	1	170	11	216	0	211	0	189	0	161	30	105	11	62	1	117	0	147
chr14.60793520.A.T	na	na	NoRepeat	0	136	0	241	0	421	64	253	0	279	0	200	0	82	0	175	0	175
chr3.180231836.G.T	na	na	NoRepeat	0	159	36	270	0	353	0	367	14	197	49	210	30	132	60	244	81	271
chr5.79415226.T.C	na	na	NoRepeat	0	166	0	207	0	253	99	229	0	243	0	185	0	58	0	111	0	129
chr13.33554653.G.A	na	na	NoRepeat	1	738	0	687	0	770	0	669	37	677	0	744	1	369	163	704	1	737
chr11.69486207.T.C	na	na	NoRepeat	0	230	1	280	0	293	0	222	0	295	51	296	0	119	0	217	0	215
chr22.43297780.T.C	na	na	NoRepeat	0	268	0	296	0	329	81	223	0	318	0	343	0	121	0	199	0	216
chr17.11080890.G.A	na	na	NoRepeat	0	190	2	235	0	404	13	219	0	213	1	233	0	77	0	301	0	176
chr4.132634591.C.T	na	na	NoRepeat	0	112	28	139	0	118	40	155	17	135	47	115	8	51	33	113	45	122
chr7.114109818.G.A	na	na	NoRepeat	0	241	0	311	0	321	0	243	0	233	0	306	20	142	0	214	0	329
chr17.15071905.G.A	na	na	NoRepeat	0	147	0	651	90	427	100	264	0	365	0	713	0	333	0	881	1	836
chr1.74260695.A.T	na	na	NoRepeat	0	162	0	303	0	349	43	272	0	203	0	281	0	141	0	334	0	361
chr9.89631471.T.C	na	na	NoRepeat	1	443	0	630	0	618	0	636	0	559	0	522	30	211	0	726	0	684
chr9.10369348.T.A	na	na	NoRepeat	0	197	0	284	0	347	0	344	0	276	0	175	0	105	99	255	0	205
chr14.86652688.G.A	na	na	NoRepeat	1	557	0	570	161	1076	0	855	0	519	0	368	0	212	0	434	0	427
chr12.83728790.G.T	na	na	NoRepeat	0	424	22	461	0	568	0	436	0	462	0	389	0	233	0	587	0	466
chrX.29688531.T.C	na	na	NoRepeat	0	334	0	439	0	345	0	274	0	352	89	187	0	166	0	242	0	269
chrX.135519929.C.A	na	na	NoRepeat	0	344	2	275	0	334	1	232	23	321	0	137	0	76	126	134	90	122
chr2.76160119.G.C	na	na	NoRepeat	0	427	0	552	154	488	149	584	0	395	0	535	0	236	0	326	1	397
chr13.103053611.A.T	na	na	chr13_103053564_103054453	0	326	28	534	2	646	0	449	1	529	109	562	41	229	0	360	0	748
chr6.2027506.T.C	na	na	NoRepeat	0	202	0	240	0	321	0	194	0	223	0	252	0	125	0	259	64	267
chr6.163057160.T.A	na	na	NoRepeat	0	100	30	201	0	302	0	162	7	163	74	218	31	117	34	67	45	225
chr7.134053811.T.C	na	na	NoRepeat	2	374	0	453	0	443	68	341	0	357	0	386	0	179	0	318	0	391
chr2.161067754.G.A	na	na	NoRepeat	0	344	0	562	0	559	0	428	12	435	0	514	0	163	106	369	1	444
chr4.37385011.C.A	na	na	NoRepeat	0	201	0	415	0	544	0	382	0	274	0	320	0	140	1	303	52	355
chr1.53347118.G.A	na	na	NoRepeat	0	262	0	457	128	607	0	490	0	386	0	449	0	226	0	410	0	426
chr4.7287846.C.T	na	na	NoRepeat	0	38	0	87	15	69	0	68	0	81	0	89	0	17	0	47	0	55
chr19.48965980.G.T	na	na	NoRepeat	0	86	0	131	0	116	30	86	0	133	0	100	0	31	0	44	0	47
chr7.10614367.G.A	na	na	NoRepeat	0	410	136	554	158	566	117	390	13	427	186	488	114	278	212	474	115	466
chr18.59205099.A.T	na	na	NoRepeat	1	439	0	396	0	563	0	419	26	400	1	295	0	155	107	248	0	250
chr15.87051852.T.A	na	na	NoRepeat	0	217	0	409	0	899	0	683	12	276	0	547	0	249	83	265	0	410
chr15.33866147.G.A	na	na	NoRepeat	0	456	0	643	0	362	0	395	0	467	0	527	0	181	103	581	0	502
chr17.52520519.G.A	na	na	NoRepeat	0	158	0	308	69	333	0	233	0	198	0	241	0	106	0	318	0	295
chr14.78548554.A.T	na	na	NoRepeat	0	347	31	426	0	1341	0	867	26	429	84	307	41	147	108	293	99	287
chr11.20843017.C.G	na	na	chr11_20843026_20843265	0	350	0	302	129	417	0	345	0	357	0	287	0	156	0	171	1	284
chr1.160309932.T.A	na	na	NoRepeat	0	162	77	262	158	372	84	236	31	216	106	284	53	133	99	274	135	282
chrX.123766252.A.T	na	na	NoRepeat	0	403	0	404	233	397	0	299	0	426	0	178	0	130	0	143	0	196
chr3.155408327.A.G	na	na	NoRepeat	0	510	0	624	0	986	63	864	0	630	0	559	0	300	0	529	0	546
chr18.47510154.C.T	na	na	NoRepeat	0	254	0	264	0	368	71	289	0	303	0	233	0	86	0	137	0	155
chr3.33810431.G.A	na	na	NoRepeat	0	204	0	329	0	301	1	254	0	245	1	205	2	82	0	180	61	197
chr9.25795894.T.A	na	na	NoRepeat	0	366	16	269	0	419	0	387	0	333	0	213	0	103	0	286	0	203
chr5.31720233.G.A	na	na	NoRepeat	0	448	0	669	1	780	0	523	0	557	0	577	1	252	134	851	0	487
chr10.1718933.A.G	na	na	NoRepeat	0	413	0	361	148	442	0	367	0	498	0	294	0	126	0	191	0	236
chr4.177100316.G.C	na	na	NoRepeat	0	151	1	187	0	187	0	329	10	146	0	165	0	98	22	99	0	158
chr8.8228324.C.T	na	na	NoRepeat	0	85	31	95	0	210	0	100	3	71	24	61	7	23	18	36	15	36
chr8.73517174.T.G	na	na	chr8_73516925_73517207	0	172	12	304	0	384	0	241	0	182	34	268	21	109	2	176	0	179
chr2.159016116.G.A	na	na	NoRepeat	0	322	0	499	0	488	0	378	0	373	2	449	29	175	0	360	0	420
chr14.72521054.G.T	na	na	NoRepeat	0	209	0	297	0	373	29	252	0	220	3	185	0	102	0	228	0	163
chr7.27359900.A.T	na	na	NoRepeat	0	451	0	645	0	605	0	446	0	483	0	608	48	247	0	574	0	580
chr8.86485917.A.C	na	na	NoRepeat	0	207	0	405	0	653	0	460	0	280	0	400	0	164	0	365	58	285
chr17.39173238.T.C	na	na	NoRepeat	0	365	0	607	224	815	0	488	0	500	0	482	0	258	0	470	0	593
chr10.64969301.T.A	na	na	NoRepeat	0	140	12	194	0	246	0	176	0	200	60	155	31	114	0	121	0	130
chr6.106097286.T.C	na	na	NoRepeat	0	198	0	171	1	263	39	187	0	190	0	118	0	76	0	146	0	115
chr1.116295772.C.T	na	na	NoRepeat	1	136	0	291	0	316	0	202	0	230	0	282	0	78	1	237	52	233
chr7.43255444.T.A	na	na	NoRepeat	0	203	0	255	83	312	0	250	0	239	0	286	0	149	0	239	0	266
chr2.72035177.G.A	na	na	NoRepeat	0	236	0	364	91	313	0	364	0	338	0	308	0	111	0	214	1	171
chr17.68399404.G.A	na	na	NoRepeat	0	455	1	851	1	1022	0	808	0	565	117	745	0	371	0	847	0	893
chr6.69590516.G.A	na	na	NoRepeat	0	209	17	244	0	268	0	240	0	258	52	140	35	89	0	173	0	178
chr7.14587309.T.C	na	na	chr7_14586963_14587300	0	124	0	231	71	196	44	143	0	159	0	163	0	79	0	176	0	180
chr20.38187409.T.G	na	na	NoRepeat	0	272	0	562	0	396	123	346	0	352	0	649	0	338	0	581	0	813
chr2.210736029.G.A	na	na	NoRepeat	0	304	0	479	180	352	0	435	0	385	0	443	0	189	0	321	0	480
chr14.83767630.C.G	na	na	NoRepeat	0	344	0	359	127	1210	0	740	0	331	0	241	0	142	0	268	0	296
chr2.2001578.G.A	na	na	NoRepeat	0	107	13	233	0	276	0	177	11	204	38	157	8	50	38	121	31	134
chr15.37972604.A.G	na	na	NoRepeat	1	454	4	768	2	697	0	723	21	540	3	650	0	282	172	646	0	598
chr2.183150938.T.A	na	na	NoRepeat	0	402	36	555	0	508	0	417	22	421	84	479	44	175	121	375	125	570
chr9.105649952.A.T	na	na	NoRepeat	0	323	200	438	234	349	301	534	45	322	254	380	125	193	322	434	275	420
chr9.47195295.G.T	na	na	NoRepeat	0	535	1	822	113	1021	0	991	0	648	0	678	0	380	1	704	0	794
chr6.80786611.A.G	na	na	NoRepeat	0	248	27	315	0	396	0	325	1	298	50	165	30	101	0	215	0	164
chr16.27949193.G.A	na	na	NoRepeat	0	100	0	123	0	148	0	110	8	113	0	122	0	55	23	83	0	116
chr1.80677575.A.G	na	na	NoRepeat	0	185	25	458	0	372	0	311	0	242	55	387	0	158	0	410	0	440
chr4.165125138.T.C	na	na	NoRepeat	0	393	0	433	140	873	0	1038	0	413	0	356	0	151	1	354	0	492
chr13.105653285.A.T	na	na	NoRepeat	0	293	26	447	0	377	0	336	16	356	86	391	33	195	98	339	64	532
chr1.150687192.A.G	na	na	NoRepeat	0	83	0	167	52	218	0	164	0	137	0	199	0	114	0	256	0	218
chr14.54357136.T.G	na	na	NoRepeat	0	267	18	344	0	984	0	566	0	393	0	196	0	96	0	181	0	152
chr18.32634524.A.T	na	na	NoRepeat	0	305	0	314	0	423	0	346	0	352	0	212	0	113	0	221	93	201
chr2.59188404.A.C	na	na	NoRepeat	0	279	0	313	0	433	0	291	1	254	0	288	0	125	0	189	49	225
chr4.27821936.T.A	na	na	NoRepeat	0	279	1	473	0	554	0	575	0	315	57	375	0	178	0	427	0	605
chr21.34093280.T.C	na	na	NoRepeat	0	344	2	508	0	642	0	442	26	383	0	436	0	196	104	325	123	409
chr18.45255144.G.A	na	na	NoRepeat	0	366	29	357	0	480	0	355	0	425	0	265	0	98	0	176	0	174
chr1.109712202.G.T	na	na	NoRepeat	0	368	19	325	0	446	0	351	0	389	61	386	26	127	0	336	0	296
chr5.169509200.G.C	na	na	NoRepeat	0	84	2	132	0	131	0	146	0	127	29	171	16	72	0	81	0	122
chr5.172839888.C.T	na	na	NoRepeat	0	109	19	242	0	215	0	218	16	191	45	248	15	105	60	166	31	212
chr1.195502829.A.T	na	na	NoRepeat	0	289	0	527	0	583	99	524	0	373	0	521	0	287	2	692	0	625
chrX.50448518.C.G	na	na	NoRepeat	0	615	0	604	0	503	0	397	30	645	0	293	0	188	182	394	0	432
chr8.72830658.T.A	na	na	chr8_72830668_72830775	0	407	0	626	168	1030	0	549	0	510	0	642	0	332	0	407	0	490
chr1.168587227.A.G	na	na	NoRepeat	2	520	30	790	0	875	0	683	0	595	130	696	30	267	0	829	0	707
chr16.79031629.A.C	na	na	NoRepeat	0	391	0	463	0	630	0	545	18	444	0	477	1	177	96	264	0	450
chr11.113222613.G.A	na	na	NoRepeat	0	150	17	221	1	272	0	213	0	191	98	211	18	77	0	103	0	217
chr8.6541616.T.C	na	na	NoRepeat	1	278	0	826	0	621	0	321	18	471	1	841	0	429	271	1048	0	767
chr20.24132622.G.T	na	na	NoRepeat	0	261	1	389	0	456	1	340	12	271	1	428	1	159	58	245	62	306
chr14.34540206.T.A	na	na	V$NKX25_02	0	278	25	367	0	391	0	275	0	308	66	373	23	160	1	374	0	417
chr12.115447313.A.T	na	na	NoRepeat	0	959	0	982	0	1199	191	873	0	1069	0	886	0	359	2	709	0	752
chr13.96909372.A.G	na	na	NoRepeat	0	267	0	394	0	417	33	274	0	300	0	225	0	149	0	288	0	290
chr3.7200756.G.A	na	na	NoRepeat	0	300	8	716	0	593	0	514	24	477	0	783	0	388	86	738	77	821
chr10.38629609.C.T	na	na	NoRepeat	0	287	1	334	133	390	83	290	0	362	0	219	0	95	0	574	0	284
chr1.81859184.C.T	na	na	NoRepeat	0	256	0	555	0	595	75	428	0	377	0	439	0	261	0	558	0	605
chr4.190280535.C.A	na	na	NoRepeat	0	506	68	539	0	359	0	437	0	506	119	546	43	261	96	367	108	492
chr7.138094029.C.T	na	na	NoRepeat	0	399	17	438	0	422	0	333	20	375	71	353	45	187	77	251	72	317
chr5.77442799.C.T	na	na	NoRepeat	0	321	34	294	0	296	0	244	0	286	0	243	0	93	0	151	0	254
chr19.34181505.G.A	na	na	NoRepeat	0	45	11	114	0	115	0	76	0	102	42	110	0	23	0	69	0	62
chr13.28851046.A.T	na	na	NoRepeat	0	154	0	286	0	316	50	238	1	218	1	250	0	153	0	260	1	274
chr11.99306528.A.T	na	na	NoRepeat	0	228	17	368	0	596	0	571	0	265	52	274	33	127	0	219	0	428
chr3.109505529.C.G	na	na	NoRepeat	0	320	31	370	0	210	0	241	12	321	82	306	29	157	100	337	90	307
chr1.35051562.C.A	na	na	NoRepeat	0	240	117	437	122	625	99	438	38	363	169	499	51	127	176	366	187	365
chr6.37096426.T.A	na	na	NoRepeat	0	292	0	464	0	531	91	433	0	450	0	754	0	228	0	311	0	324
chr4.41811283.A.G	na	na	NoRepeat	0	255	0	311	0	372	70	371	0	288	0	293	0	107	0	286	0	338
chr4.123005006.G.A	na	na	NoRepeat	0	288	0	419	154	449	0	423	0	394	0	308	0	158	0	262	0	379
chr6.118667364.C.A	na	na	NoRepeat	0	206	0	287	0	419	0	286	0	279	0	224	0	93	0	118	90	212
chr2.13595569.G.A	na	na	NoRepeat	0	236	0	330	0	480	90	369	0	293	0	231	0	169	0	282	0	307
chr11.13749632.G.A	na	na	NoRepeat	0	143	61	227	69	237	56	174	11	203	99	177	42	81	66	181	59	213
chr10.109947970.T.C	na	na	NoRepeat	0	518	0	543	0	565	0	479	18	475	0	335	0	212	118	396	0	443
chr8.89337561.C.A	na	na	chr8_89337454_89337559	1	341	0	488	114	701	0	591	0	327	0	470	0	255	0	382	0	361
chr13.74626720.C.T	na	na	NoRepeat	1	243	0	352	0	379	0	324	1	321	11	328	34	150	1	270	0	298
chr3.56463939.C.T	na	na	NoRepeat	1	309	1	354	0	271	0	249	11	345	0	221	0	110	100	185	64	153
chr14.60273815.G.C	na	na	NoRepeat	0	232	0	307	0	404	0	262	0	279	0	192	0	104	0	167	50	194
chr10.133166049.C.A	na	na	NoRepeat	0	484	0	439	1	552	0	479	28	502	0	308	0	198	107	361	0	415
chr21.44046417.A.T	na	na	NoRepeat	0	40	0	74	0	117	0	108	0	88	0	93	0	37	0	62	22	71
chr4.55120467.A.C	na	na	NoRepeat	0	277	0	650	146	577	0	424	0	412	0	447	0	231	0	368	0	422
chr15.85228917.T.C	na	na	NoRepeat	0	294	0	440	133	933	0	682	0	353	0	583	0	239	0	265	0	239
chr3.25600123.T.A	na	na	NoRepeat	0	378	38	441	0	349	0	334	0	460	98	316	48	120	1	135	0	264
chr5.130278253.C.G	na	na	NoRepeat	0	319	0	549	0	579	143	409	0	406	0	425	0	263	0	423	0	503
chr7.154885962.G.T	na	na	NoRepeat	0	315	100	436	188	542	124	364	25	374	170	482	75	176	145	229	196	385
chr1.65248147.A.T	na	na	NoRepeat	0	459	60	881	0	1129	0	762	26	598	127	786	86	433	168	915	227	963
chr9.136963475.A.T	na	na	NoRepeat	0	66	0	61	0	53	0	93	0	77	0	86	0	31	0	47	24	61
chr4.23352761.A.C	na	na	NoRepeat	0	137	20	271	0	372	0	272	5	156	40	264	15	135	46	257	81	313
chr8.120196944.G.A	na	na	NoRepeat	1	696	0	1039	219	2013	0	1483	4	715	0	775	0	493	0	1061	0	1045
chr1.105616828.A.C	na	na	NoRepeat	0	245	0	422	0	467	0	336	0	284	6	459	19	203	0	446	0	467
chr18.25924524.A.T	na	na	NoRepeat	0	251	0	337	89	364	0	283	0	313	0	213	0	141	0	260	0	362
chr1.162284365.G.T	na	na	NoRepeat	0	423	7	688	0	809	0	788	28	607	91	830	44	320	112	938	106	752
chr12.103776801.A.G	na	na	NoRepeat	0	440	0	652	0	682	0	440	16	467	0	557	1	305	123	719	1	593
chr13.104170161.G.T	na	na	NoRepeat	0	180	0	386	67	355	0	314	0	300	0	351	0	173	0	252	0	475
chr8.65311932.T.A	na	na	NoRepeat	0	264	0	429	137	715	0	391	0	361	0	466	0	183	0	302	0	363
chr4.178299757.C.G	na	na	NoRepeat	0	324	0	399	0	472	95	671	0	350	0	379	0	234	0	277	1	396
chr9.31628903.C.A	na	na	NoRepeat	0	184	3	206	1	244	0	201	0	183	55	149	26	70	0	188	0	131
chr3.95941537.G.C	na	na	NoRepeat	0	163	39	189	56	274	52	152	14	176	31	171	34	104	106	229	78	207
chr3.56507784.C.T	na	na	NoRepeat	0	242	20	272	0	231	0	174	19	290	76	173	27	102	79	157	58	141
chr2.212857466.T.C	na	na	NoRepeat	1	302	0	446	0	328	0	354	0	392	4	358	27	150	1	316	1	476
chr14.27878148.C.A	na	na	NoRepeat	0	187	0	307	0	504	0	283	0	225	0	285	0	137	0	337	32	297
chr12.20603939.A.G	na	na	NoRepeat	0	368	0	369	0	696	0	451	0	468	68	245	0	148	0	420	0	423
chr13.47355345.T.C	na	na	NoRepeat	0	204	0	219	0	233	0	162	0	192	0	222	0	125	0	226	33	207
chr3.35710847.G.T	na	na	NoRepeat	0	292	3	411	0	410	1	388	13	351	0	310	0	151	93	200	78	308
chrX.54925939.T.A	na	na	NoRepeat	0	351	32	407	1	356	0	268	35	449	5	153	55	158	154	253	101	279
chr6.47119373.C.T	na	na	NoRepeat	0	358	0	786	208	771	0	696	0	496	0	1113	0	492	2	769	0	666
chr11.56653187.A.G	na	na	NoRepeat	0	498	23	629	0	664	0	518	1	556	0	726	0	355	0	783	1	688
chr8.127468174.G.A	na	na	NoRepeat	0	401	0	1023	174	1802	0	1492	0	525	0	980	0	601	0	702	0	643
chr3.176683248.G.A	na	na	chr3_176682653_176683282	0	326	39	395	0	506	0	524	0	458	91	385	29	200	0	445	0	412
chr12.89315390.C.T	na	na	NoRepeat	0	254	1	492	0	585	70	420	0	437	1	349	0	219	0	519	0	480
chr3.151332787.T.A	na	na	NoRepeat	0	423	31	677	1	516	0	629	26	521	94	620	36	344	122	650	122	653
chr5.138007599.G.T	na	na	NoRepeat	0	407	5	637	1	813	0	554	0	675	125	553	0	209	0	466	0	514
chr2.1622531.G.A	na	na	NoRepeat	0	72	0	110	0	111	20	70	0	96	0	93	0	24	0	59	0	56
chr3.188213587.C.G	na	na	NoRepeat	0	226	0	436	0	481	95	589	0	352	0	304	0	136	0	335	0	292
chr5.133623901.A.G	na	na	NoRepeat	0	270	0	243	0	261	61	211	0	230	0	174	0	69	0	205	0	220
chr14.40958796.G.T	na	na	NoRepeat	0	287	25	620	2	566	0	378	0	408	63	538	53	297	0	629	0	650
chr1.189877841.T.A	na	na	NoRepeat	0	325	2	473	0	616	0	445	17	367	1	470	0	284	92	612	101	556
chr1.247204801.C.A	na	na	NoRepeat	0	146	0	167	0	147	0	117	4	148	0	139	0	57	29	69	0	113
chr13.62789367.C.T	na	na	NoRepeat	0	156	16	180	0	180	0	149	10	135	39	145	23	86	30	122	34	131
chr8.110506355.C.G	na	na	NoRepeat	0	205	0	358	1	685	48	362	0	246	0	430	0	226	0	213	0	198
chr4.11953371.T.C	na	na	NoRepeat	0	283	3	524	0	517	0	467	10	336	0	483	0	193	83	513	0	566
chr11.99719989.C.G	na	na	NoRepeat	0	64	0	108	27	152	0	112	0	72	0	85	0	43	0	37	0	145
chr6.152120165.G.A	na	na	NoRepeat	0	346	0	512	130	558	0	469	0	399	0	491	0	203	0	194	0	378
chr12.132956822.T.A	na	na	CpG_GALNT9_50406	0	83	0	163	0	160	0	124	7	153	0	134	0	49	31	93	0	114
chr7.124447093.A.T	na	na	NoRepeat	0	198	0	206	0	191	0	155	0	186	0	201	0	113	57	134	1	222
chr2.154838284.T.A	na	na	NoRepeat	0	277	0	402	0	383	0	290	0	273	0	323	0	121	0	307	74	366
chr7.146142431.T.G	na	na	NoRepeat	0	225	8	387	0	423	0	286	0	318	73	442	0	200	0	244	0	356
chr14.94324511.G.A	na	na	NoRepeat	0	1160	1	885	262	859	0	877	0	1113	0	817	0	328	0	743	1	715
chrX.69082804.G.C	na	na	NoRepeat	0	649	0	733	0	682	0	517	0	732	0	520	0	320	0	578	227	568
chr13.88966994.A.G	na	na	NoRepeat	0	216	4	275	0	309	1	201	4	199	0	197	0	112	65	199	58	188
chr3.52716503.T.C	na	na	NoRepeat	0	192	0	263	0	280	55	219	0	205	0	177	0	101	0	201	1	166
chr4.104953448.T.G	na	na	NoRepeat	0	221	0	358	0	386	59	401	0	271	0	245	0	123	0	153	0	280
chr2.16105217.A.T	na	na	NoRepeat	0	90	0	174	0	259	0	191	6	157	0	120	0	57	43	121	0	113
chr11.127902736.A.C	na	na	NoRepeat	1	852	1	562	161	541	0	438	0	426	0	434	0	209	0	227	0	428
chr5.85694051.G.C	na	na	NoRepeat	0	234	0	348	90	389	0	334	0	297	0	269	0	135	0	197	0	297
chr13.49523803.G.A	na	na	chr13_49523747_49524379	0	357	21	299	0	334	0	273	2	356	69	285	35	136	0	282	0	265
chr14.26531660.G.T	na	na	NoRepeat	0	131	0	339	43	444	0	351	0	201	0	339	0	176	0	378	0	371
chr10.82868997.T.C	na	na	NoRepeat	2	212	0	241	0	343	0	226	1	227	0	146	0	103	0	141	48	152
chr18.63172793.A.C	na	na	NoRepeat	0	209	0	250	0	282	45	229	0	221	0	133	0	98	0	135	0	200
chr1.163470791.C.A	na	na	NoRepeat	0	273	1	501	0	661	79	562	0	376	0	511	1	227	0	541	0	510
chr5.158555359.T.C	na	na	NoRepeat	0	141	0	222	0	241	0	186	12	195	0	161	0	66	38	136	1	207
chr1.213568280.C.A	na	na	NoRepeat	0	209	0	167	0	262	61	197	0	250	0	170	0	46	0	228	0	128
chr7.3285574.C.T	na	na	NoRepeat	0	183	1	310	0	334	0	208	0	273	3	285	24	125	1	248	0	200
chr1.24670452.G.A	na	na	NoRepeat	0	100	0	191	0	259	0	195	1	196	0	290	0	56	0	194	40	200
chr18.63421588.G.A	na	na	chr18_63421504_63421616	0	255	0	328	126	417	0	305	0	327	0	226	0	102	0	170	0	191
chr2.75878005.A.G	na	na	NoRepeat	0	273	0	524	0	469	0	463	0	369	0	401	31	159	0	282	0	289
chr8.143719421.G.T	na	na	NoRepeat	0	69	10	73	24	85	22	59	4	57	29	69	7	26	21	26	16	29
chr11.25868545.C.T	na	na	NoRepeat	1	179	0	261	80	248	0	227	0	207	0	164	0	96	0	199	0	179
chr5.150764987.A.G	na	na	NoRepeat	0	208	6	429	0	382	0	317	23	295	0	278	0	115	61	244	75	271
chr6.6589695.C.A	na	na	NoRepeat	0	280	0	205	0	273	0	188	12	261	0	218	0	102	49	196	0	190
chr21.24015381.C.T	na	na	NoRepeat	0	336	0	329	0	382	43	320	0	302	0	285	0	151	0	315	0	315
chr4.43403026.A.T	na	na	NoRepeat	0	270	56	301	76	447	54	349	7	245	97	309	58	128	46	223	95	262
chr3.131606445.G.C	na	na	NoRepeat	0	353	95	527	0	388	0	372	12	402	103	470	79	316	95	471	84	476
chr9.74173110.G.T	na	na	NoRepeat	0	294	0	645	0	614	0	715	0	440	78	563	0	326	0	871	1	777
chr21.33695406.C.T	na	na	NoRepeat	0	94	0	150	0	229	27	137	0	131	0	140	0	52	0	66	0	95
chr3.132555300.C.A	na	na	NoRepeat	0	259	0	481	0	370	100	428	0	408	0	429	0	267	1	490	0	474
chr13.81876256.T.C	na	na	NoRepeat	1	275	0	360	0	432	0	342	0	362	0	286	1	137	59	245	0	324
chr17.52116155.A.T	na	na	NoRepeat	0	479	0	760	0	975	0	767	0	581	7	666	56	325	0	820	0	765
chr2.199071081.A.C	na	na	NoRepeat	0	175	0	306	85	297	61	198	0	241	0	261	0	105	0	219	0	279
chr8.4072667.G.T	na	na	NoRepeat	0	342	39	976	0	758	0	469	26	513	133	956	71	485	136	989	110	817
chr1.47149171.C.T	na	na	NoRepeat	0	270	0	387	0	530	62	356	0	346	0	395	0	182	0	393	0	333
chr2.165209628.C.A	na	na	NoRepeat	1	284	0	508	106	446	0	360	0	401	1	428	0	179	0	309	0	488
chr14.79609286.T.G	na	na	NoRepeat	0	691	44	714	1	1838	0	1414	0	667	127	511	49	278	0	548	0	543
chr11.80528029.T.A	na	na	NoRepeat	0	316	77	524	107	590	74	492	37	368	95	555	37	246	239	693	150	605
chr8.136810971.G.T	na	na	NoRepeat	0	237	7	429	1	519	0	522	2	358	71	339	64	190	0	278	0	330
chr1.221707141.C.T	na	na	chr1_221707004_221707286	0	480	17	450	0	338	0	353	0	451	101	283	53	154	0	510	0	220
chr4.146442099.G.T	na	na	NoRepeat	0	226	24	306	0	492	0	531	10	296	54	275	15	124	86	234	27	225
chr3.74946572.A.G	na	na	NoRepeat	0	228	27	269	0	206	0	163	7	241	49	168	26	89	66	162	66	159
chr11.40149009.G.A	na	na	NoRepeat	0	438	0	444	0	361	69	292	0	431	0	247	0	156	0	257	0	290
chr2.130155088.A.T	na	na	NoRepeat	0	278	0	409	0	401	59	287	0	307	0	342	0	130	0	275	0	369
chr7.149198138.T.A	na	na	NoRepeat	0	128	67	232	78	223	53	173	13	203	67	247	28	86	73	114	74	168
chr2.124913238.G.T	na	na	NoRepeat	1	308	2	456	0	460	0	347	20	370	0	417	0	135	90	367	0	374
chr3.6720839.G.C	na	na	NoRepeat	1	337	24	754	0	564	0	469	0	460	71	686	47	385	0	721	0	763
chr5.86776371.C.G	na	na	NoRepeat	0	386	0	563	0	647	146	501	0	418	0	385	0	204	0	305	0	455
chr14.26387969.G.C	na	na	NoRepeat	0	323	81	523	0	984	0	660	24	341	97	475	46	328	134	627	113	599
chr9.85702051.G.T	na	na	NoRepeat	0	269	1	436	0	419	60	497	0	328	1	354	0	193	0	588	0	563
chr20.15715974.G.T	na	na	chr20_15715942_15716059	1	328	0	681	1	718	85	481	1	431	0	666	0	291	0	451	0	693
chr6.106605622.G.C	na	na	NoRepeat	0	426	1	378	148	483	0	418	0	525	0	302	0	116	0	337	0	213
chr1.72676953.T.A	na	na	NoRepeat	0	169	10	218	0	257	0	231	0	196	33	243	0	113	1	261	0	286
chr14.22573809.A.G	na	na	NoRepeat	0	337	0	540	0	1035	0	606	0	397	0	530	0	234	104	477	0	635
chr8.101393330.G.A	na	na	NoRepeat	0	337	20	725	0	1264	0	877	0	499	79	831	48	383	0	697	0	445
chr3.123257036.T.C	na	na	NoRepeat	0	182	0	230	75	153	0	190	0	192	0	167	0	98	0	165	0	185
chr1.184898624.A.T	na	na	NoRepeat	0	233	0	434	120	673	0	486	0	381	0	471	0	191	0	556	0	452
chr3.168294103.G.T	na	na	NoRepeat	0	310	0	354	0	484	0	398	9	275	0	281	0	181	74	337	0	372
chr4.155316818.A.T	na	na	NoRepeat	0	183	1	266	0	667	0	642	0	243	0	237	0	102	0	188	68	271
chr8.58056361.G.T	na	na	chr8_58056256_58056373	0	118	0	256	0	316	0	206	0	171	0	231	0	100	0	157	51	150
chr8.117506597.C.T	na	na	NoRepeat	0	461	0	804	151	1412	1	1083	0	486	0	982	0	399	0	805	0	672
chr3.81723759.T.C	na	na	NoRepeat	0	352	77	339	0	301	0	196	14	296	73	197	54	146	83	194	90	222
chr4.152362796.C.T	na	na	NoRepeat	0	494	3	647	0	1224	0	1242	0	651	108	596	0	290	0	564	0	667
chr15.68503740.C.A	na	na	NoRepeat	0	88	0	135	55	86	0	94	0	119	0	164	0	39	0	59	0	85
chr10.133113837.G.C	na	na	NoRepeat	0	261	2	301	0	354	0	266	15	336	0	216	0	141	54	273	66	303
chr10.45176046.C.G	na	na	NoRepeat	0	166	0	223	0	366	53	278	0	193	0	232	0	100	0	191	0	197
chr5.118085312.C.T	na	na	NoRepeat	0	283	0	415	115	490	0	380	0	349	0	421	0	188	0	379	0	363
chr3.111458658.G.A	na	na	NoRepeat	0	240	86	390	1	254	30	229	35	357	127	244	48	125	193	286	160	253
chr14.47792091.C.T	na	na	NoRepeat	0	269	0	346	0	335	0	208	0	233	60	387	0	183	0	456	0	318
chr15.24519461.A.G	na	na	NoRepeat	0	267	0	398	0	211	0	281	0	244	0	320	0	157	75	292	0	293
chr10.117836156.C.G	na	na	NoRepeat	0	150	0	193	0	256	41	172	0	192	0	126	0	91	1	151	0	159
chr11.67523416.T.A	na	na	NoRepeat	0	199	22	341	0	406	0	307	0	312	56	326	28	153	0	327	59	302
chr1.179529852.G.T	na	na	NoRepeat	0	237	0	511	0	713	0	429	0	367	1	407	0	217	1	599	52	388
chr1.80056978.G.C	na	na	NoRepeat	0	146	50	235	73	294	30	222	22	206	138	301	48	155	117	288	116	316
chr13.110022211.T.A	na	na	NoRepeat	0	72	0	95	0	112	0	92	0	115	0	148	0	40	0	52	14	121
chr12.4098492.A.C	na	na	NoRepeat	0	214	0	295	0	385	0	253	8	225	1	267	0	91	50	163	0	217
chr4.138149245.C.A	na	na	NoRepeat	1	182	0	219	1	316	0	236	0	206	0	226	1	91	1	207	57	243
chr2.230594715.T.C	na	na	NoRepeat	0	396	135	572	178	390	172	500	30	542	219	502	108	256	141	453	251	531
chr16.22179202.T.C	na	na	NoRepeat	0	142	0	197	78	249	0	157	0	233	0	235	0	89	0	133	0	176
chr4.53166858.G.A	na	na	NoRepeat	0	249	0	432	0	387	64	299	0	259	0	272	0	200	0	312	0	322
chr5.12944587.A.T	na	na	NoRepeat	0	151	11	294	0	352	0	227	0	191	6	198	49	140	0	411	0	161
chr2.123115437.G.C	na	na	NoRepeat	0	415	1	602	207	705	0	553	0	456	0	532	0	225	0	557	0	647
chr3.178865021.A.G	na	na	NoRepeat	0	200	0	370	0	547	0	502	16	287	0	307	0	144	67	278	0	330
chr13.59322131.T.C	na	na	NoRepeat	0	338	0	410	118	399	0	353	1	342	0	289	0	162	0	353	0	330
chr22.50678278.C.G	na	na	NoRepeat	0	65	25	94	0	66	0	77	4	91	36	118	13	37	25	46	31	69
chr1.88912106.G.A	na	na	NoRepeat	0	377	0	781	0	966	0	695	0	550	0	752	0	391	0	714	163	873
chr1.247846600.T.A	na	na	NoRepeat	0	512	249	650	261	535	302	522	62	575	314	396	159	232	413	430	410	469
chr6.37999599.A.T	na	na	NoRepeat	0	179	11	351	85	343	0	340	0	253	0	535	0	258	0	419	0	362
chr1.171041725.A.T	na	na	NoRepeat	0	299	28	522	0	646	0	524	0	373	0	474	0	238	1	673	0	524
chr1.193487924.A.T	na	na	NoRepeat	0	96	0	168	0	188	19	146	0	122	0	200	0	82	0	185	0	196
chr15.80453269.C.G	na	na	NoRepeat	0	90	0	166	0	156	0	172	4	87	0	155	0	45	13	28	0	45
chr3.8147674.T.A	na	na	NoRepeat	1	346	1	838	0	702	0	587	29	534	1	953	1	489	107	897	2	1013
chr5.4191616.C.A	na	na	NoRepeat	0	73	0	208	38	203	0	124	0	146	0	217	0	111	0	212	0	115
chr7.56663437.C.A	na	na	NoRepeat	0	197	7	244	0	250	0	223	0	218	30	184	16	107	0	235	0	218
chr1.161165150.C.A	na	na	NoRepeat	0	251	0	331	0	310	52	269	0	342	0	390	0	123	0	275	0	258
chr5.85279055.C.T	na	na	NoRepeat	0	166	0	174	56	214	0	172	0	155	0	143	0	77	0	114	0	171
chr2.179302560.C.A	na	na	NoRepeat	0	251	0	342	0	323	0	255	0	288	1	283	26	93	0	252	0	311
chr13.32505973.G.A	na	na	NoRepeat	0	302	0	405	108	315	94	280	1	328	0	322	0	159	0	426	0	413
chr6.73135693.T.C	na	na	NoRepeat	0	437	34	362	0	479	0	454	0	441	0	286	1	154	0	474	0	297
chr11.11614250.C.G	na	na	NoRepeat	0	188	3	264	0	314	0	248	11	236	0	213	0	75	36	197	0	198
chr9.126011296.T.C	na	na	NoRepeat	0	227	3	296	0	254	0	285	0	261	57	238	0	143	1	219	0	246
chr2.41791629.T.C	na	na	NoRepeat	0	278	98	389	126	559	110	441	19	382	145	364	69	161	77	258	158	275
chr10.56629870.A.T	na	na	NoRepeat	0	127	19	245	0	367	0	360	3	196	50	161	15	97	31	179	43	191
chr4.48390464.G.A	na	na	NoRepeat	0	273	0	720	0	959	81	760	0	375	0	692	0	480	0	565	0	683
chr1.181739840.T.C	na	na	NoRepeat	0	360	0	503	113	686	104	478	1	479	0	496	0	212	0	447	0	456
chr2.78853615.T.G	na	na	NoRepeat	0	264	0	337	1	269	49	307	0	232	0	262	0	113	0	184	0	236
chr2.35137173.A.G	na	na	NoRepeat	0	337	0	504	0	570	0	500	0	385	0	430	0	225	100	344	0	339
chr17.51726494.A.G	na	na	NoRepeat	0	157	0	267	0	320	0	253	0	201	0	242	22	129	0	305	0	285
chr2.39177900.A.C	na	na	NoRepeat	0	294	0	360	0	519	0	343	0	338	0	407	37	152	0	254	0	253
chr8.122489281.T.C	na	na	NoRepeat	0	283	0	944	1	1872	109	1273	0	443	1	1001	0	503	0	728	0	573
chr14.60770134.G.A	na	na	NoRepeat	0	357	40	523	3	788	0	521	0	510	87	400	32	216	0	419	0	397
chr14.39623351.G.C	na	na	NoRepeat	1	380	0	537	122	521	89	382	0	411	0	506	0	251	0	583	0	593
chr9.71329611.T.A	na	na	NoRepeat	0	221	27	452	1	441	71	453	1	341	40	382	24	206	74	566	58	466
chr17.71237006.A.G	na	na	NoRepeat	0	277	0	441	114	636	0	470	0	385	0	425	0	182	0	376	0	383
chr6.118968951.C.T	na	na	chr6_118968889_118968987	0	112	1	114	0	138	0	119	4	106	0	67	0	27	36	40	30	79
chr1.239838383.C.A	na	na	NoRepeat	0	250	0	300	0	212	82	243	0	303	0	219	0	110	0	172	0	192
chr7.120168655.G.A	na	na	NoRepeat	0	396	0	622	0	660	0	533	0	481	0	576	0	348	0	506	170	726
chr4.85009471.C.T	na	na	NoRepeat	0	232	0	341	0	321	0	264	0	257	0	188	0	106	1	222	38	234
chr10.132474392.C.G	na	na	NoRepeat	0	122	0	90	0	155	0	103	7	140	0	81	0	52	23	80	23	90
chr5.22974494.C.T	na	na	NoRepeat	0	511	36	759	0	803	0	559	0	616	0	662	1	392	0	1087	0	534
chr1.210183430.A.T	na	na	NoRepeat	0	430	36	462	0	478	0	361	13	480	103	285	56	150	124	593	133	313
chr16.74971210.C.T	na	na	NoRepeat	0	301	32	456	0	553	0	461	15	358	90	489	27	202	94	283	71	540
chr13.111040435.G.A	na	na	NoRepeat	0	172	16	312	1	386	0	239	0	289	0	332	1	130	1	168	0	320
chr8.139704794.T.A	na	na	NoRepeat	0	598	5	708	0	927	0	915	0	601	166	589	62	273	0	488	0	473
chr15.87736797.A.G	na	na	NoRepeat	0	400	0	427	0	680	0	544	0	393	0	447	50	235	0	198	0	362
chr15.81813353.A.T	na	na	NoRepeat	0	445	44	783	0	1183	0	999	0	578	0	763	0	406	0	364	0	428
chr4.155501953.A.G	na	na	NoRepeat	0	119	0	209	0	306	33	296	0	149	0	130	0	56	0	149	0	140
chr5.1181257.C.A	na	na	NoRepeat	0	27	0	59	0	58	0	38	0	39	0	83	0	19	14	39	0	17
chr10.86558747.T.A	na	na	NoRepeat	0	429	83	534	0	697	0	525	25	513	117	324	53	233	149	281	142	375
chr3.42366376.A.G	na	na	NoRepeat	1	178	0	347	0	373	61	329	0	286	0	280	0	123	0	350	0	233
chr5.20158632.T.C	na	na	NoRepeat	0	281	146	428	120	480	80	273	27	291	98	401	104	237	374	554	88	302
chr14.25905653.A.G	na	na	NoRepeat	0	370	0	694	0	940	0	605	0	507	0	624	0	311	0	766	139	742
chr10.106776411.C.A	na	na	NoRepeat	1	571	1	641	0	807	0	631	0	629	0	446	0	326	2	575	119	449
chr15.93062327.C.G	na	na	NoRepeat	0	316	0	468	106	297	0	367	0	355	0	442	0	194	0	388	0	375
chr6.44572615.G.A	na	na	NoRepeat	0	583	29	784	0	1190	0	1001	0	707	126	1525	29	578	0	932	0	810
chr5.62176360.T.C	na	na	NoRepeat	0	330	1	452	0	521	0	422	0	404	0	357	0	171	0	272	99	311
chr8.130200971.A.G	na	na	NoRepeat	1	303	57	685	0	1347	1	1086	9	360	83	862	34	392	120	512	79	405
chr20.61691216.G.C	na	na	NoRepeat	0	40	0	81	21	121	17	66	0	76	0	100	0	25	0	37	0	78
chr18.1853143.A.G	na	na	NoRepeat	0	274	19	397	0	731	0	690	16	315	85	309	47	182	82	326	72	339
chr4.179857243.A.T	na	na	NoRepeat	0	368	0	362	0	343	69	259	0	319	0	307	0	166	0	359	0	444
chr7.119238037.G.T	na	na	NoRepeat	0	475	3	563	0	500	0	444	17	413	1	419	1	247	135	390	94	476
chr3.85829925.A.T	na	na	NoRepeat	0	188	0	230	0	189	0	138	0	161	1	136	33	92	0	108	0	161
chr2.156565099.A.T	na	na	NoRepeat	0	592	0	360	0	333	0	243	0	255	0	231	16	122	0	264	0	344
chr1.160599324.T.C	na	na	NoRepeat	0	296	1	631	1	748	0	627	15	502	0	655	0	272	109	721	0	626
chr8.139552793.T.A	na	na	NoRepeat	0	194	3	338	0	464	0	429	0	312	59	271	0	148	0	227	0	239
chr6.6997255.T.C	na	na	NoRepeat	0	156	12	204	0	273	1	196	0	271	0	204	0	109	0	207	0	189
chr3.39359869.T.A	na	na	NoRepeat	0	208	0	323	0	260	48	296	0	253	1	193	0	98	1	291	0	248
chr1.71284096.A.T	na	na	NoRepeat	0	326	0	556	0	544	47	341	0	390	0	475	0	215	0	413	0	464
chrX.97767411.C.A	na	na	NoRepeat	0	406	0	327	0	306	19	281	0	401	0	182	0	94	0	128	0	136
chr2.237382249.G.A	na	na	NoRepeat	0	253	0	292	0	247	0	263	11	250	0	279	0	114	61	269	0	296
chr2.67785508.A.G	na	na	NoRepeat	0	241	29	376	0	503	0	377	23	287	72	332	26	180	61	254	70	221
chr15.21917940.C.A	na	na	NoRepeat	1	349	82	486	0	249	0	262	0	309	46	416	0	154	2	330	43	323
chr7.24434977.C.G	na	na	NoRepeat	2	1026	0	1200	0	1221	205	1032	0	1148	0	1129	0	539	0	1182	0	1231
chr13.97104035.G.C	na	na	NoRepeat	0	270	25	368	0	345	0	280	0	263	0	290	0	154	0	233	0	312
chr12.55500159.C.A	na	na	NoRepeat	0	222	20	290	1	344	0	297	1	246	68	253	30	131	0	254	0	253
chr5.23017232.C.A	na	na	NoRepeat	0	503	0	706	177	800	1	518	0	547	1	616	0	393	0	1049	0	539
chr6.66938888.T.A	na	na	NoRepeat	0	169	3	192	0	228	0	212	16	160	1	108	0	82	96	157	52	114
chr20.38773306.C.A	na	na	chr20_38773155_38773773	0	261	21	530	0	449	0	325	0	392	32	610	0	305	0	582	0	708
chr13.59258813.C.T	na	na	NoRepeat	0	180	0	323	0	369	1	282	0	270	0	227	0	116	0	237	84	245
chr1.81704928.A.C	na	na	chr1_81704937_81705163	0	164	0	357	109	489	0	335	0	269	0	371	0	169	0	357	0	395
chr15.47829617.C.A	na	na	NoRepeat	0	261	23	351	0	291	0	320	0	266	43	302	26	90	0	243	0	289
chr1.147775741.C.G	na	na	NoRepeat	0	182	14	448	0	570	0	516	0	369	59	511	22	207	0	516	0	505
chr5.44528364.C.T	na	na	NoRepeat	0	295	46	443	0	528	0	349	0	376	156	381	38	243	0	600	0	368
chr18.52286098.G.T	na	na	NoRepeat	0	435	7	482	0	549	0	431	28	458	2	328	1	168	132	272	100	271
chr1.221316390.T.A	na	na	NoRepeat	0	241	19	256	1	212	0	216	0	261	0	181	0	88	0	328	0	189
chr9.122602146.A.G	na	na	NoRepeat	0	141	0	154	0	129	0	143	0	155	0	136	0	58	44	114	0	111
chr4.53671.C.T	na	na	CpG_ZNF595_0	0	326	0	492	32	532	1	346	0	492	1	313	0	69	0	209	0	282
chr2.106812950.C.T	na	na	NoRepeat	0	181	12	266	0	281	0	255	12	235	58	234	14	67	45	186	39	177
chr10.63116689.A.T	na	na	NoRepeat	0	417	0	454	160	829	0	618	0	411	0	268	0	199	0	272	0	274
chr8.63879586.C.T	na	na	NoRepeat	0	324	30	555	0	865	0	501	1	383	66	545	43	225	0	384	0	380
chr2.31522521.C.T	na	na	V$PPARG_03	0	361	32	455	0	659	0	467	0	458	83	410	33	126	0	296	78	228
chr9.73595775.G.A	na	na	NoRepeat	0	637	0	961	204	867	0	1104	0	817	0	895	0	399	1	1318	0	1068
chr3.102364760.G.A	na	na	NoRepeat	0	431	56	607	0	890	0	553	23	460	102	424	68	353	165	520	141	496
chr4.96737668.G.C	na	na	NoRepeat	1	528	0	681	0	674	1	777	0	589	1	511	4	405	0	563	141	682
chr2.23756709.G.C	na	na	chr2_23756663_23756783	0	601	23	580	0	713	0	631	19	579	111	433	27	173	95	294	103	336
chr4.167800717.A.T	na	na	NoRepeat	1	360	31	515	0	952	0	1390	19	457	74	465	50	221	135	393	87	482
chr2.69324480.A.G	na	na	NoRepeat	0	334	0	473	303	638	0	461	0	394	0	426	0	168	0	309	0	285
chr3.70882785.G.T	na	na	NoRepeat	0	454	70	486	0	373	0	272	0	447	0	344	0	148	0	321	0	287
chr9.70840742.T.C	na	na	NoRepeat	0	335	0	651	0	603	57	643	0	429	0	523	0	320	0	710	0	746
chr17.38263822.C.G	na	na	NoRepeat	1	376	0	481	0	483	100	418	0	554	0	476	0	130	0	243	0	311
chr3.174635672.A.G	na	na	NoRepeat	0	226	38	319	94	464	77	340	10	258	48	292	31	169	60	292	66	301
chr7.85460801.G.T	na	na	NoRepeat	0	148	1	260	0	278	0	192	0	164	0	248	0	112	46	173	0	224
chr5.34453691.A.C	na	na	NoRepeat	0	217	28	314	0	392	0	203	0	252	83	245	35	164	0	397	0	225
chr13.57812043.A.G	na	na	NoRepeat	0	229	0	336	0	380	0	290	0	278	0	287	0	142	0	308	73	250
chr4.167100384.T.A	na	na	NoRepeat	0	226	37	282	86	250	108	291	10	217	39	202	43	100	51	199	38	255
chr12.119250791.A.G	na	na	NoRepeat	0	348	10	533	1	731	0	442	20	443	0	414	0	212	127	403	125	451
chr6.66055923.C.T	na	na	NoRepeat	0	351	0	379	108	356	0	332	0	384	0	206	0	120	2	337	0	237
chr16.49124305.G.C	na	na	NoRepeat	1	302	0	341	167	448	0	342	0	320	0	287	0	146	0	240	0	271
chr13.53934696.T.A	na	na	NoRepeat	0	339	0	465	170	539	0	402	0	456	0	384	0	169	0	395	0	372
chr3.97946541.G.T	na	na	NoRepeat	0	295	0	374	141	594	0	337	0	358	0	254	0	186	0	308	0	308
chr8.29776827.G.T	na	na	NoRepeat	0	443	0	757	237	1191	2	935	0	646	0	490	0	360	1	607	0	557
chr4.16067862.T.G	na	na	NoRepeat	0	328	28	507	0	563	0	389	0	442	0	487	0	242	0	436	0	586
chr1.80852091.C.G	na	na	NoRepeat	0	292	0	459	0	536	0	345	0	336	63	468	0	245	0	429	0	461
chr8.10540812.C.A	na	na	NoRepeat	0	54	0	68	0	125	14	74	0	60	0	47	0	25	0	30	0	29
chr12.16695821.A.T	na	na	NoRepeat	0	392	0	296	0	576	0	361	0	354	0	216	0	137	0	209	96	248
chr3.22917602.G.T	na	na	NoRepeat	0	272	0	439	116	333	0	293	0	305	0	385	0	198	0	400	0	483
chr16.25007051.C.A	na	na	NoRepeat	0	370	0	481	0	586	0	390	0	457	0	451	0	166	0	291	94	495
chr10.19539666.A.G	na	na	NoRepeat	0	558	0	641	230	810	0	619	0	579	0	427	0	248	0	420	1	454
chr21.10628308.C.T	na	na	NoRepeat	0	556	3	742	0	873	0	648	5	677	0	736	0	338	50	579	53	786
chr20.12874309.A.T	na	na	NoRepeat	0	227	0	447	0	480	69	300	0	297	0	479	0	234	0	373	0	470
chr8.98391411.G.T	na	na	NoRepeat	0	337	1	730	0	1242	83	897	1	450	1	769	0	318	1	595	1	419
chr4.166468814.A.G	na	na	NoRepeat	0	178	13	304	0	725	0	556	0	266	55	248	20	85	0	194	0	210
chr20.35827249.G.T	na	na	NoRepeat	0	460	0	1003	0	926	0	633	0	748	1	1381	1	656	1	954	166	1158
chr1.157068881.C.G	na	na	chr1_157068880_157069196	0	286	0	464	0	554	98	548	0	398	0	568	0	181	0	379	0	366
chr10.7387786.C.T	na	na	NoRepeat	0	296	0	278	1	388	0	337	0	324	0	221	0	96	0	176	78	190
chr5.164221431.T.C	na	na	NoRepeat	0	207	23	383	0	409	0	277	0	290	62	233	47	155	1	236	0	323
chr17.70058731.G.A	na	na	NoRepeat	0	465	0	644	146	781	114	631	0	532	0	613	0	278	0	625	0	637
chr1.244073845.G.C	na	na	NoRepeat	0	375	93	400	0	273	0	248	23	392	131	377	69	169	78	224	167	348
chr6.137872054.G.A	na	na	NoRepeat	0	340	24	500	0	656	0	460	0	351	79	488	51	226	0	247	0	459
chr14.81851598.A.G	na	na	NoRepeat	0	252	0	263	0	1189	0	807	0	302	5	218	13	100	0	209	0	212
chr2.171742654.A.G	na	na	NoRepeat	0	189	0	306	0	279	0	217	0	243	0	265	0	60	0	149	34	159
chr1.59871362.G.T	na	na	NoRepeat	0	449	0	984	1	1143	0	770	0	781	1	963	0	477	0	1075	155	982
chr18.14401361.G.A	na	na	NoRepeat	0	167	14	272	0	247	0	193	0	174	0	197	0	121	0	205	0	222
chr4.181891664.G.A	na	na	NoRepeat	0	241	4	349	0	202	0	160	11	266	1	250	0	151	57	228	53	268
chr7.89461731.C.A	na	na	NoRepeat	0	176	0	280	97	284	0	226	0	216	0	264	0	120	0	203	0	264
chr4.145288970.C.A	na	na	NoRepeat	0	574	0	837	226	1239	0	1403	0	718	0	710	0	297	0	578	0	719
chr1.180537796.G.A	na	na	NoRepeat	0	369	0	652	210	1001	0	722	0	598	1	692	0	266	0	769	0	626
chr14.41370935.A.G	na	na	NoRepeat	2	242	20	537	0	513	0	284	0	349	70	437	41	279	0	521	0	517
chr2.75850360.A.T	na	na	NoRepeat	0	386	1	355	0	339	1	346	0	303	8	333	24	135	1	256	0	294
chrX.45709178.T.A	na	na	NoRepeat	0	226	24	225	0	215	0	158	19	221	66	108	28	71	61	122	61	115
chr5.176533181.T.A	na	na	NoRepeat	0	119	0	193	0	157	0	135	0	161	0	177	0	45	0	81	19	109
chr6.163980977.G.T	na	na	NoRepeat	0	174	0	288	0	392	0	250	0	246	47	333	0	150	0	154	0	278
chr13.47004903.A.T	na	na	NoRepeat	0	245	0	318	0	340	60	278	0	257	0	251	0	164	0	247	0	289
chr19.31775888.G.A	na	na	NoRepeat	1	206	0	228	85	290	0	196	0	271	0	244	0	69	0	133	0	176
chr16.79999101.T.A	na	na	NoRepeat	0	385	1	614	0	801	0	703	0	513	0	529	0	218	0	341	99	658
chr12.102238803.C.A	na	na	NoRepeat	0	316	99	421	110	345	79	262	31	353	151	333	65	164	136	376	148	332
chr3.164804347.C.G	na	na	NoRepeat	0	169	1	292	0	364	0	292	19	246	0	235	0	160	48	243	0	247
chr11.88640511.C.T	na	na	NoRepeat	0	203	0	362	0	777	0	660	8	306	0	274	0	116	66	324	0	307
chr12.90852583.G.A	na	na	NoRepeat	0	157	0	228	74	253	0	181	0	183	0	162	0	91	0	289	0	187
chr3.34088490.C.A	na	na	chr3_34088291_34088678	0	249	0	504	0	593	181	432	0	389	0	350	0	242	1	249	0	397
chr6.49636523.A.T	na	na	NoRepeat	0	626	0	1091	0	922	0	885	0	691	0	1375	0	720	0	1294	159	1185
chr5.23422690.A.T	na	na	NoRepeat	0	266	0	286	74	339	0	214	0	220	0	247	0	181	1	377	0	203
chr2.30209908.C.T	na	na	NoRepeat	0	261	18	360	0	469	0	306	0	268	75	364	30	142	0	175	52	157
chr12.92406613.G.A	na	na	NoRepeat	2	301	0	463	0	550	0	408	0	411	0	324	0	156	0	472	89	372
chr13.102230939.C.G	na	na	NoRepeat	0	300	0	437	0	522	0	376	0	359	5	391	35	196	0	325	0	657
chr16.61147943.T.G	na	na	NoRepeat	0	244	16	241	0	266	1	200	0	211	47	182	23	106	0	167	0	200
chr4.28099438.C.A	na	na	NoRepeat	0	270	0	427	0	461	82	398	0	265	1	284	0	157	1	350	0	527
chr15.101071691.C.T	na	na	NoRepeat	0	387	2	934	0	504	0	368	0	692	0	1031	0	411	0	1308	73	891
chr13.91227805.G.A	na	na	NoRepeat	0	194	41	241	0	271	1	225	11	214	54	229	27	107	56	181	56	193
chrX.34545965.A.T	na	na	NoRepeat	0	219	0	289	0	232	0	212	0	226	0	135	0	86	0	178	53	177
chr4.84594135.A.G	na	na	NoRepeat	0	236	4	506	0	460	0	431	24	436	0	529	0	278	93	531	81	599
chr21.19607091.T.C	na	na	NoRepeat	0	190	0	281	67	388	1	291	0	182	0	230	0	102	0	236	0	207
chr1.176409057.C.G	na	na	NoRepeat	0	354	0	464	0	688	98	436	0	444	0	563	0	245	0	667	0	518
chr20.21446065.C.T	na	na	NoRepeat	0	143	12	304	0	433	0	296	0	235	49	337	19	164	0	249	57	322
chr1.151723339.C.T	na	na	NoRepeat	0	379	0	657	130	724	0	673	0	632	1	774	0	363	0	952	0	730
chr9.79747983.T.A	na	na	NoRepeat	0	471	0	582	148	681	0	848	0	456	0	698	0	270	0	797	1	719
chr16.84070671.C.T	na	na	NoRepeat	0	102	0	104	0	139	0	98	0	147	0	111	0	29	0	48	45	120
chr20.6978088.C.A	na	na	NoRepeat	0	422	1	853	1	825	0	586	0	509	2	864	0	395	0	552	137	894
chr2.116303174.G.T	na	na	NoRepeat	0	541	1	829	0	744	0	803	0	695	1	593	0	250	0	742	173	743
chr2.162245061.C.T	na	na	NoRepeat	0	232	0	295	0	287	65	226	0	271	0	274	0	110	0	242	0	341
chr6.64924490.T.A	na	na	NoRepeat	0	145	0	174	0	227	37	155	0	145	0	105	0	58	0	157	0	105
chr5.98958410.C.T	na	na	NoRepeat	0	203	0	360	0	412	0	332	0	277	0	256	0	143	0	216	63	252
chr3.20679602.A.C	na	na	NoRepeat	0	152	0	201	1	167	58	170	0	152	0	174	0	79	0	199	0	196
chr12.45223954.T.A	na	na	NoRepeat	0	57	0	91	30	105	0	72	0	64	0	49	0	16	0	43	0	36
chr3.93581911.T.C	na	na	NoRepeat	0	368	160	674	317	1111	186	526	61	644	126	532	124	357	306	662	337	742
chr4.118387607.A.T	na	na	NoRepeat	0	153	0	211	0	176	0	211	0	171	2	136	28	97	0	135	0	174
chr13.107928646.C.A	na	na	NoRepeat	0	212	27	406	0	435	0	323	0	318	0	375	0	209	0	275	94	542
chr8.57608057.T.C	na	na	NoRepeat	0	325	10	566	1	671	0	501	0	360	156	538	0	254	0	372	0	405
chr6.46005694.T.A	na	na	NoRepeat	0	339	0	525	0	492	0	403	20	407	0	903	0	353	88	610	0	573
chr10.1698405.A.G	na	na	NoRepeat	0	406	0	369	0	499	50	397	1	446	0	343	0	121	0	185	0	225
chr12.30069419.C.A	na	na	NoRepeat	0	265	2	448	2	551	0	315	9	340	0	321	0	196	74	391	90	433
chr6.93109239.C.T	na	na	NoRepeat	0	261	0	270	92	325	0	247	0	241	0	164	0	87	0	72	0	179
chr14.61158209.C.T	na	na	NoRepeat	0	288	0	273	0	624	0	429	0	256	0	206	0	116	0	523	72	232
chr20.33276251.C.A	na	na	NoRepeat	0	458	34	759	0	568	0	453	0	553	77	964	45	397	0	802	0	878
chr4.115333726.T.C	na	na	NoRepeat	0	170	0	206	0	225	1	228	0	170	0	168	0	82	0	162	46	235
chr1.57928079.T.A	na	na	NoRepeat	0	342	0	606	0	603	53	412	0	438	0	608	0	242	0	543	0	562
chr6.141264611.C.T	na	na	NoRepeat	0	243	0	351	0	504	77	350	0	263	0	377	0	173	0	216	0	327
chr3.179201600.T.A	na	na	NoRepeat	0	340	0	278	0	389	0	364	0	246	2	237	28	104	0	222	0	271
chr8.137850164.C.G	na	na	NoRepeat	0	215	0	296	0	411	0	318	0	232	1	233	0	144	0	220	71	224
chr3.187721433.T.C	na	na	NoRepeat	0	207	27	345	1	454	0	433	0	305	72	299	27	96	1	292	0	245
chr5.15279900.C.A	na	na	NoRepeat	0	249	0	476	0	596	111	313	0	350	1	453	0	221	0	687	0	315
chr13.97596658.A.T	na	na	chr13_97596652_97596830	0	334	0	383	0	384	0	347	0	331	0	291	0	166	0	310	70	287
chr14.91878497.C.T	na	na	NoRepeat	0	129	0	92	32	224	0	163	0	113	0	95	0	38	0	78	0	69
chr22.36347916.A.G	na	na	NoRepeat	0	189	11	289	0	302	0	203	0	225	29	235	22	115	0	239	0	252
chr5.22017227.T.A	na	na	NoRepeat	0	446	0	660	0	685	0	462	19	450	0	526	0	406	117	914	119	426
chr19.47208360.T.C	na	na	NoRepeat	0	259	0	291	0	242	0	247	0	283	4	238	30	101	0	135	0	208
chr8.93620628.A.T	na	na	NoRepeat	0	314	17	488	0	867	0	687	0	335	111	585	36	283	0	398	0	364
chr1.211278291.G.A	na	na	NoRepeat	0	176	0	237	0	274	0	225	0	217	0	146	0	78	0	265	78	156
chr13.111478849.G.A	na	na	NoRepeat	0	290	0	360	93	297	0	280	0	315	0	325	0	111	0	165	0	323
chr1.2486367.G.C	na	na	NoRepeat	0	97	9	146	0	170	0	117	0	167	66	228	15	43	0	52	0	65
chr2.70885362.T.A	na	na	NoRepeat	0	483	39	544	0	753	0	571	32	487	120	612	36	203	111	386	102	331
chr11.23980182.C.A	na	na	NoRepeat	0	188	0	192	0	191	0	174	0	192	0	167	0	71	0	149	39	124
chr6.81170028.C.G	na	na	NoRepeat	0	305	1	244	65	270	0	262	1	267	0	190	0	92	0	264	0	156
chr7.154166045.A.T	na	na	NoRepeat	0	183	0	269	77	260	0	210	0	258	0	267	0	92	0	213	0	220
chr2.78041102.T.A	na	na	NoRepeat	1	663	0	810	0	732	138	750	0	609	0	624	0	347	0	586	0	625
chr15.98735666.G.A	na	na	NoRepeat	0	408	1	752	0	551	0	599	27	599	0	818	0	350	129	690	1	697
chr11.130290625.G.A	na	na	NoRepeat	0	65	14	128	0	143	0	89	0	139	0	172	0	44	0	27	0	93
chr4.66779459.C.T	na	na	NoRepeat	1	154	16	313	0	279	0	248	0	231	43	246	31	139	0	259	45	253
chr14.54552325.A.T	na	na	NoRepeat	0	165	0	189	102	708	0	344	0	206	0	146	0	69	0	135	0	123
chr6.2919879.G.A	na	na	NoRepeat	0	231	23	295	0	372	0	274	15	332	52	317	10	115	65	286	51	288
chr2.207383525.C.T	na	na	NoRepeat	0	237	0	352	0	262	0	282	13	299	0	305	0	124	68	254	0	366
chr3.8091457.T.C	na	na	NoRepeat	0	380	74	768	0	640	0	539	42	481	78	747	39	420	143	1003	111	895
chr15.62868718.G.A	na	na	NoRepeat	0	358	0	473	0	291	90	357	0	365	0	490	0	201	0	295	4	391
chrX.142239418.A.T	na	na	NoRepeat	0	678	0	427	56	428	0	384	0	586	0	259	0	133	0	173	0	264
chr21.25553335.T.A	na	na	NoRepeat	0	170	0	325	0	402	65	260	1	301	0	262	0	131	0	245	0	248
chr20.22352328.C.T	na	na	NoRepeat	0	174	0	416	0	461	0	340	0	287	0	426	0	168	0	275	55	331
chr1.90500025.T.G	na	na	NoRepeat	0	145	0	276	0	279	0	201	0	186	0	206	0	111	34	278	0	233
chr7.125664712.G.A	na	na	NoRepeat	0	233	20	328	0	358	0	280	0	272	61	299	20	186	0	249	0	371
chr7.146090184.T.A	na	na	NoRepeat	0	265	0	284	0	266	0	200	3	190	0	250	0	123	65	174	0	280
chr10.108838097.G.T	na	na	NoRepeat	0	209	0	196	0	228	18	171	0	206	0	121	0	76	0	184	0	185
chr5.157534628.G.A	na	na	NoRepeat	0	132	0	197	0	281	0	159	0	213	47	195	0	71	0	160	0	189
chr8.76757671.C.G	na	na	NoRepeat	0	141	0	188	0	257	0	230	3	130	0	245	0	116	51	127	0	147
chr10.64954742.T.G	na	na	NoRepeat	0	155	0	179	0	206	0	172	0	176	0	90	13	72	0	112	0	113
chr17.29403332.A.T	na	na	NoRepeat	0	338	0	313	137	266	0	214	0	421	0	209	0	119	0	194	0	215
chr15.80632338.G.A	na	na	NoRepeat	1	284	7	359	0	500	0	443	16	313	78	402	30	172	97	201	0	156
chr1.103030480.C.G	na	na	NoRepeat	0	259	10	338	0	381	0	277	13	290	46	334	18	129	75	339	77	376
chr1.8838532.T.A	na	na	NoRepeat	0	313	0	448	0	527	48	374	0	371	0	483	0	190	0	350	0	336
chr12.24220225.A.G	na	na	chr12_24219885_24220291	0	228	0	245	0	428	36	221	0	242	0	184	0	83	0	130	0	177
chr8.1411600.G.A	na	na	NoRepeat	0	239	0	266	143	557	0	243	0	294	0	210	0	107	1	112	0	158
chr10.113255389.G.T	na	na	chr10_113255382_113255806	0	211	0	236	97	295	0	255	0	263	0	181	0	134	0	200	0	221
chr7.121082923.A.G	na	na	NoRepeat	0	201	0	408	0	522	0	331	19	335	0	428	1	205	107	285	105	428
chr9.128278181.C.T	na	na	NoRepeat	0	153	17	247	0	212	0	172	0	205	46	152	16	88	0	152	1	178
chr15.48115575.G.A	na	na	NoRepeat	1	239	4	317	0	273	0	253	0	289	52	284	15	70	0	166	0	233
chr10.68629765.T.A	na	na	NoRepeat	0	415	26	445	0	572	0	438	0	436	0	351	0	250	0	353	0	326
chr2.218494271.T.A	na	na	NoRepeat	0	77	0	129	0	96	22	121	0	126	0	114	0	36	0	76	0	99
chr2.16534031.G.T	na	na	NoRepeat	0	186	1	364	0	543	0	372	0	304	0	311	0	148	0	266	92	267
chr9.29729937.A.G	na	na	NoRepeat	0	308	0	261	101	359	0	379	0	291	0	205	0	103	1	271	0	202
chr1.83884626.C.T	na	na	NoRepeat	0	545	0	807	188	817	0	694	0	611	0	764	0	322	0	780	0	785
chr1.189428137.C.T	na	na	NoRepeat	0	255	91	496	123	555	93	447	33	334	153	459	61	220	188	620	207	511
chr10.69263403.C.T	na	na	NoRepeat	0	318	25	425	0	564	1	361	23	355	90	258	63	213	126	259	100	260
chr11.121900845.T.A	na	na	NoRepeat	0	313	0	330	0	255	97	240	0	239	0	264	0	88	0	168	0	276
chr18.65388110.A.C	na	na	NoRepeat	0	432	0	450	0	491	0	431	18	350	0	281	0	146	85	202	0	280
chr19.29061487.C.A	na	na	NoRepeat	0	376	0	563	0	411	0	435	0	452	4	548	48	131	0	336	0	443
chr1.19716574.C.T	na	na	NoRepeat	0	139	2	129	0	171	0	146	7	155	0	149	0	44	25	93	22	109
chr20.58496619.T.G	na	na	NoRepeat	0	96	55	206	0	159	0	82	10	117	67	221	28	104	48	152	95	248
chr15.27610015.G.T	na	na	NoRepeat	0	410	0	745	0	593	0	608	3	471	0	570	0	203	92	466	0	491
chr4.16225225.A.G	na	na	NoRepeat	0	137	8	157	0	132	0	118	0	113	35	152	17	69	0	147	0	178
chr1.35263457.A.G	na	na	NoRepeat	0	284	89	320	0	403	1	258	32	331	112	330	44	93	88	213	88	230
chr4.164475084.T.A	na	na	NoRepeat	0	182	0	277	0	447	0	486	0	257	58	254	0	132	0	197	0	256
chr6.140691745.A.T	na	na	NoRepeat	0	289	33	487	0	606	0	452	0	359	79	446	62	215	0	286	83	381
chr8.23640148.C.T	na	na	NoRepeat	0	399	1	566	0	846	102	621	0	470	1	348	0	232	0	386	0	357
chr3.79348288.A.T	na	na	NoRepeat	0	187	0	261	0	181	0	127	1	247	1	167	0	107	0	130	45	137
chr12.69897336.G.T	na	na	NoRepeat	0	284	134	503	0	605	0	420	37	399	206	393	72	159	222	449	205	338
chr3.140022715.G.T	na	na	NoRepeat	0	358	84	425	1	524	49	572	45	478	197	380	86	189	188	280	201	353
chr4.152597873.G.A	na	na	NoRepeat	0	152	22	385	0	632	0	568	6	365	50	348	38	104	48	207	35	275
chr21.36820921.T.C	na	na	NoRepeat	0	214	0	324	103	439	1	295	0	266	1	293	0	161	0	250	0	308
chr9.115890650.A.G	na	na	NoRepeat	0	271	0	275	0	187	67	238	0	252	0	231	0	127	0	220	0	207
chr6.88681537.C.T	na	na	chr6_88681439_88681705	0	274	0	344	0	467	1	417	0	312	0	226	0	142	112	117	0	243
chr15.89972978.A.C	na	na	NoRepeat	0	207	0	308	94	430	0	403	0	312	0	367	0	122	0	126	0	171
chr3.149955712.A.T	na	na	NoRepeat	0	190	3	256	0	354	0	382	19	278	0	280	1	123	64	205	65	226
chr7.134036642.G.T	na	na	NoRepeat	0	294	0	458	1	502	124	353	0	421	1	480	0	188	0	343	1	417
chr8.131318619.T.C	na	na	chr8_131318619_131318722	0	416	0	739	0	1374	1	1076	0	550	0	959	0	466	0	439	106	396
chr4.12371900.G.A	na	na	NoRepeat	0	260	14	449	0	493	0	411	0	306	62	382	1	258	0	519	0	562
chr6.143179690.C.A	na	na	NoRepeat	0	315	0	495	0	784	0	515	0	401	0	564	0	244	0	347	95	455
chr11.130068125.G.C	na	na	NoRepeat	0	87	0	150	0	147	0	105	7	120	0	114	0	19	18	36	0	59
chr4.178776236.C.A	na	na	NoRepeat	0	316	27	525	0	521	0	773	0	457	0	392	0	194	0	319	0	441
chr7.14057241.T.C	na	na	NoRepeat	0	219	0	332	0	398	52	276	0	273	0	307	0	153	0	309	0	334
chr4.116002428.C.T	na	na	NoRepeat	0	265	0	387	156	485	0	435	0	345	0	302	1	190	0	307	0	413
chr8.90017942.A.G	na	na	NoRepeat	0	265	49	525	121	800	162	572	15	275	61	480	29	217	69	350	77	387
chr8.33181235.G.A	na	na	NoRepeat	0	348	0	468	0	612	59	470	1	376	0	318	0	215	3	286	2	260
chr19.45228255.C.T	na	na	NoRepeat	0	515	6	562	0	561	0	504	29	568	1	516	0	143	91	302	0	416
chr4.14718736.G.A	na	na	V$OCT1_02	0	240	3	539	0	631	3	527	1	355	0	458	1	187	0	644	213	658
chr4.3592636.G.T	na	na	NoRepeat	0	776	4	741	0	784	0	723	0	714	55	766	2	279	0	551	0	663
chr7.96737503.A.T	na	na	NoRepeat	0	205	0	250	0	209	0	162	0	153	0	204	0	111	47	147	0	228
chr8.107389845.T.C	na	na	NoRepeat	0	238	0	524	0	832	0	675	0	366	55	533	0	338	1	535	0	346
chr17.56272300.C.A	na	na	chr17_56272282_56272558	0	308	0	560	0	720	0	523	24	462	0	599	0	183	65	344	0	393
chr20.41092001.T.G	na	na	chr20_41091902_41092219	1	423	6	847	0	649	0	524	15	577	0	992	1	411	129	784	129	1063
chr4.182262852.A.T	na	na	NoRepeat	0	328	5	593	0	326	0	255	1	392	73	412	0	225	0	412	0	523
chr16.82548029.G.A	na	na	NoRepeat	0	180	3	214	0	274	0	199	0	173	53	189	0	82	0	124	0	192
chr8.140568392.G.C	na	na	NoRepeat	0	51	0	111	0	145	0	137	0	92	1	67	6	52	0	52	0	39
chr2.33541396.A.T	na	na	NoRepeat	0	172	0	241	0	387	54	234	0	197	0	237	0	89	1	183	0	190
chr7.149295296.C.A	na	na	NoRepeat	0	373	0	507	126	459	115	412	0	474	0	477	0	187	0	284	0	331
chr6.94419443.T.C	na	na	NoRepeat	0	444	26	396	0	509	1	435	0	384	94	260	69	196	0	146	0	291
chr15.93258786.G.T	na	na	NoRepeat	0	189	0	402	0	266	0	316	18	340	1	362	1	157	61	303	0	314
chr7.128762922.A.T	na	na	NoRepeat	0	318	0	462	0	417	0	357	21	387	1	381	0	169	76	252	0	304
chr5.28595249.G.T	na	na	NoRepeat	0	519	61	962	1	1230	0	696	30	546	144	723	73	514	497	936	172	744
chr17.20015853.C.A	na	na	chr17_20015793_20015947	0	165	1	231	86	317	71	195	0	194	0	211	0	88	0	176	0	163
chr7.23709012.C.T	na	na	NoRepeat	0	164	0	216	38	139	0	147	0	153	0	161	0	79	0	200	0	150
chr3.105777760.G.A	na	na	NoRepeat	0	621	0	782	0	583	0	643	31	689	0	638	1	438	226	666	0	618
chr17.64704962.A.T	na	na	NoRepeat	0	379	0	620	183	877	0	688	0	541	0	590	0	335	0	567	0	644
chr3.6019823.G.A	na	na	NoRepeat	0	251	0	548	98	435	0	366	0	329	0	541	0	255	1	560	0	538
chr6.106379717.C.G	na	na	NoRepeat	0	229	0	204	102	321	74	234	0	309	0	150	0	74	0	177	1	141
chr16.3347420.A.G	na	na	NoRepeat	0	173	0	181	0	222	0	128	0	163	25	163	0	86	0	107	0	146
chr6.164096246.G.C	na	na	chr6_164096081_164096374	0	414	1	510	0	869	0	449	0	507	2	596	0	266	0	271	85	473
chr15.95217063.C.A	na	na	NoRepeat	0	178	0	265	0	198	34	218	0	230	0	278	0	111	0	226	0	260
chrX.103686658.G.A	na	na	NoRepeat	0	348	40	317	0	355	0	261	0	369	81	172	41	74	0	133	0	138
chr1.219858965.G.A	na	na	NoRepeat	0	301	0	362	0	262	0	297	25	388	2	261	0	109	110	405	0	204
chr4.161217948.G.C	na	na	NoRepeat	0	326	29	380	0	808	0	755	0	326	57	321	34	167	0	310	98	434
chr4.115915995.T.A	na	na	NoRepeat	0	153	0	260	1	295	37	271	0	212	0	187	0	120	0	227	0	294
chr1.11610652.G.T	na	na	NoRepeat	0	313	0	402	0	588	0	392	0	482	0	506	0	159	0	299	62	308
chr4.80212215.C.T	na	na	NoRepeat	0	227	0	415	0	377	71	315	0	299	0	488	0	257	0	500	0	591
chr1.168094514.C.T	na	na	NoRepeat	0	437	1	619	0	607	119	533	0	476	0	568	0	229	0	596	0	462
chr5.120200434.C.T	na	na	NoRepeat	0	405	0	672	0	925	0	693	28	579	0	690	0	348	143	626	0	717
chr7.147876053.A.C	na	na	NoRepeat	0	220	66	292	84	251	85	250	12	243	167	342	47	119	56	170	93	234
chr4.179767806.G.A	na	na	NoRepeat	0	445	0	575	0	500	0	547	35	463	0	459	0	284	128	549	0	704
chr7.36225684.G.C	na	na	NoRepeat	0	300	0	364	0	327	0	290	28	373	0	302	1	143	135	273	0	305
chr20.4530585.G.A	na	na	NoRepeat	1	381	24	865	0	958	0	712	0	610	0	977	0	426	0	741	0	937
chr2.148451337.C.A	na	na	NoRepeat	0	203	15	222	0	189	0	146	8	181	47	203	6	55	44	121	35	178
chr18.52981410.T.A	na	na	V$IRF2_01	0	327	0	365	0	417	62	355	0	383	0	244	0	133	0	182	0	215
chr3.23200178.C.G	na	na	NoRepeat	0	236	25	564	0	501	0	337	0	414	0	462	0	297	1	467	0	460
chr8.75097221.C.G	na	na	NoRepeat	0	254	0	405	161	606	116	434	0	320	0	473	0	166	0	286	0	296
chr10.97205948.T.A	na	na	V$SRF_01	0	166	2	204	0	265	0	197	0	220	3	164	21	77	0	103	0	119
chr3.139783796.A.G	na	na	NoRepeat	0	177	0	246	0	256	0	373	0	222	0	193	40	115	0	186	0	171
chr4.105202497.A.T	na	na	NoRepeat	0	223	0	366	0	333	56	353	0	265	0	211	0	151	0	142	0	302
chr18.19305238.A.G	na	na	NoRepeat	0	292	0	366	0	321	51	272	0	372	1	236	0	139	1	266	0	303
chr4.80735334.A.T	na	na	chr4_80735286_80735717	0	291	0	433	144	402	0	377	0	336	0	354	0	219	0	522	0	569
chr8.83106171.C.A	na	na	chr8_83106089_83106431	0	167	0	352	69	457	0	359	0	202	0	293	0	147	0	257	0	204
chr8.56019223.T.A	na	na	NoRepeat	0	185	0	272	0	295	0	265	5	215	0	247	0	128	51	143	0	154
chr12.103041240.C.T	na	na	NoRepeat	0	491	0	664	0	559	0	456	0	585	0	493	52	316	1	770	0	641
chr6.21991164.G.T	na	na	chr6_21991087_21991345	0	637	1	774	1	792	1	678	1	710	8	902	40	360	0	724	0	804
chr19.30297304.A.T	na	na	NoRepeat	0	240	0	306	0	281	0	263	0	300	0	319	0	82	0	155	50	207
chr13.96623304.T.C	na	na	NoRepeat	0	249	25	316	0	433	0	314	1	291	0	283	0	159	0	340	0	274
chr6.83927161.T.A	na	na	NoRepeat	0	113	4	77	0	103	0	94	0	87	0	76	0	41	0	79	0	53
chr22.44487090.G.A	na	na	NoRepeat	0	245	0	240	97	247	0	158	0	217	0	275	0	81	0	142	1	191
chr1.163164000.T.G	na	na	NoRepeat	0	272	0	584	0	675	0	575	16	428	0	600	0	262	76	707	0	665
chrX.145424544.G.A	na	na	NoRepeat	0	215	0	171	0	160	0	123	0	218	2	84	24	49	0	57	0	77
chr17.28708242.A.C	na	na	NoRepeat	0	137	0	260	0	239	0	150	0	241	1	189	34	84	0	124	0	130
chr4.95890664.C.T	na	na	NoRepeat	0	310	8	563	2	561	0	524	0	403	84	364	0	263	0	357	0	500
chr21.41245071.G.A	na	na	NoRepeat	0	184	1	319	109	484	0	325	0	296	0	272	0	133	0	214	0	253
chr2.51564660.G.A	na	na	NoRepeat	0	627	35	662	0	1018	0	767	0	586	135	600	80	347	0	434	0	580
chr4.188886644.T.C	na	na	NoRepeat	0	252	0	399	0	273	1	272	0	300	74	328	0	195	1	316	0	414
chr9.103821487.A.T	na	na	chr9_103821422_103821798	0	234	48	316	96	333	146	342	23	257	58	283	28	133	57	288	50	265
chr15.95958263.C.G	na	na	NoRepeat	0	332	5	464	0	383	1	433	0	422	70	458	30	272	0	476	0	510
chr3.164281422.A.G	na	na	NoRepeat	0	371	31	395	2	512	0	419	8	322	51	333	32	227	84	336	95	444
chr4.27204086.C.A	na	na	NoRepeat	0	120	10	229	0	295	0	238	0	162	29	151	0	71	0	188	1	233
chr10.43209999.A.T	na	na	NoRepeat	0	295	0	477	0	726	0	539	0	426	0	400	39	209	0	435	0	412
chr10.67843157.C.T	na	na	NoRepeat	0	364	0	433	0	450	0	331	0	371	0	275	0	181	0	219	88	248
chr7.75463184.C.T	na	na	NoRepeat	1	235	1	261	68	224	0	195	0	249	0	221	0	73	0	143	0	144
chr6.93871629.G.A	na	na	NoRepeat	0	166	72	173	103	180	87	135	0	150	90	114	32	52	35	37	88	106
chr20.17577421.G.T	na	na	NoRepeat	0	303	1	339	0	373	101	321	0	348	0	344	0	139	0	294	0	360
chr1.152164982.G.A	na	na	NoRepeat	0	573	49	1075	0	1069	0	1028	23	806	157	1109	78	528	122	1185	158	958
chr13.93103979.G.C	na	na	NoRepeat	0	390	0	504	0	466	0	397	38	446	1	389	0	194	106	349	0	391
chr4.55220376.G.A	na	na	NoRepeat	0	543	287	860	180	851	139	593	16	511	121	577	61	353	139	593	112	673
chr8.33791211.G.A	na	na	NoRepeat	0	312	0	335	1	441	0	349	0	242	0	251	31	148	0	236	0	215
chr4.163157547.C.A	na	na	NoRepeat	0	160	8	208	0	383	0	430	0	177	39	197	20	86	0	131	0	233
chr10.14435498.G.T	na	na	NoRepeat	0	467	2	399	2	565	0	429	1	486	0	282	1	137	0	242	72	230
chr10.107725884.T.C	na	na	NoRepeat	0	360	0	315	112	371	86	288	0	338	1	217	0	150	1	234	0	268
chr2.44638272.T.A	na	na	NoRepeat	0	286	13	349	0	469	0	377	0	232	56	323	41	166	0	271	0	254
chr2.35199596.A.T	na	na	NoRepeat	0	295	0	457	152	643	0	475	0	358	0	429	0	183	0	334	0	371
chr3.74635285.G.C	na	na	V$EVI1_02	0	140	0	191	0	171	0	112	12	180	0	114	0	75	50	123	0	125
chr14.46939281.G.A	na	na	NoRepeat	0	242	0	440	97	393	0	274	0	289	0	421	0	208	0	434	0	485
chr18.70525571.C.T	na	na	NoRepeat	0	345	0	277	0	356	0	281	0	308	0	177	0	100	0	185	84	190
chr4.36916700.C.T	na	na	NoRepeat	0	389	0	559	129	669	0	677	0	392	0	493	0	205	1	430	0	547
chr2.240052792.T.A	na	na	NoRepeat	0	58	6	79	0	51	0	55	0	73	15	62	4	23	0	33	0	52
chr7.44278695.G.A	na	na	NoRepeat	0	32	3	69	0	55	0	69	3	50	12	68	1	16	8	34	7	23
chr20.55114479.G.A	na	na	NoRepeat	0	365	0	593	121	460	0	340	0	440	0	788	0	290	0	479	0	648
chr2.195080928.A.C	na	na	NoRepeat	0	449	0	554	0	620	0	458	20	407	0	524	0	230	141	433	0	658
chr2.32711020.A.G	na	na	NoRepeat	0	251	14	353	0	534	0	408	0	271	64	347	37	183	0	258	0	230
chr9.8994050.G.A	na	na	NoRepeat	0	429	0	327	0	556	0	468	19	448	0	260	0	155	111	332	0	269
chr5.151349491.A.T	na	na	NoRepeat	0	241	14	351	0	378	0	232	0	271	46	217	21	111	1	238	0	273
chr16.82929021.T.A	na	na	NoRepeat	0	439	0	393	0	356	0	291	0	350	0	343	0	143	0	183	117	370
chr12.17469586.C.A	na	na	NoRepeat	0	238	0	327	0	590	0	358	0	324	53	191	2	117	0	316	0	380
chr5.117595863.A.G	na	na	NoRepeat	0	303	21	389	0	461	0	385	0	305	68	394	38	222	0	382	0	447
chr1.42597542.C.T	na	na	NoRepeat	0	190	0	275	0	415	0	251	0	250	0	289	1	112	0	242	39	217
chr4.86441411.A.T	na	na	NoRepeat	1	469	49	500	145	374	82	374	12	403	86	288	39	158	84	310	70	373
chr13.51736057.C.T	na	na	chr13_51735834_51736325	0	193	67	198	97	259	62	197	24	241	92	167	45	91	102	155	114	192
chr17.11187811.G.A	na	na	NoRepeat	0	295	0	330	0	488	3	320	21	364	0	223	0	132	177	445	0	247
chr2.147124670.T.C	na	na	chr2_147124593_147124710	0	272	102	362	139	412	65	268	22	297	118	292	72	143	181	287	131	326
chr12.63713464.T.C	na	na	NoRepeat	0	112	30	175	0	231	0	153	18	161	29	130	19	68	75	170	33	105
chr11.72189833.A.T	na	na	NoRepeat	0	334	2	418	0	485	0	449	12	440	0	359	0	186	92	441	97	411
chr7.113655441.G.T	na	na	NoRepeat	0	324	226	444	313	512	215	354	35	348	336	411	173	202	334	339	389	433
chr2.207573692.T.C	na	na	NoRepeat	0	304	0	360	0	281	79	281	0	285	0	338	0	88	1	299	0	354
chr4.43574123.A.T	na	na	NoRepeat	0	218	0	574	0	656	88	491	0	293	0	541	0	299	2	406	0	665
chr1.172929501.A.T	na	na	NoRepeat	0	531	0	983	300	1493	1	899	1	840	1	863	0	397	0	1093	0	993
chr5.56743604.C.A	na	na	NoRepeat	0	269	11	278	0	366	0	300	0	329	0	246	0	87	0	190	0	209
chr16.82365563.C.T	na	na	NoRepeat	0	270	0	408	1	432	0	285	0	316	0	309	0	136	0	174	168	416
chr18.65388109.C.A	na	na	NoRepeat	1	433	0	450	0	491	0	424	18	350	0	279	0	145	85	202	0	282
chr18.31291515.A.G	na	na	V$LHX3_01	0	445	1	374	0	495	0	405	0	393	1	314	0	158	0	289	101	252
chr16.58586635.C.T	na	na	NoRepeat	0	204	2	277	0	334	0	280	12	266	0	258	0	112	74	237	63	221
chr6.20664215.A.G	na	na	NoRepeat	0	200	0	444	0	496	0	358	0	344	2	391	20	218	0	365	0	397
chr4.101311543.T.A	na	na	NoRepeat	0	214	0	349	0	366	0	341	0	243	0	223	0	118	70	139	0	241
chr9.10321615.G.T	na	na	NoRepeat	0	526	0	480	171	556	0	613	0	528	0	358	0	198	0	484	2	387
chr1.197454318.C.A	na	na	NoRepeat	0	335	0	649	160	650	0	559	0	476	0	604	0	311	0	831	1	686
chr4.10605857.A.G	na	na	NoRepeat	0	296	0	538	96	452	91	525	0	404	0	524	0	164	0	482	0	551
chr3.6877200.A.T	na	na	NoRepeat	0	236	0	638	0	449	0	375	10	350	0	528	0	282	45	540	0	601
chr11.105077045.G.T	na	na	NoRepeat	1	297	0	385	0	350	0	268	14	278	0	321	0	130	53	136	0	329
chr6.48130799.A.G	na	na	NoRepeat	0	317	0	652	137	584	0	502	1	382	0	838	0	437	1	738	0	706
chr19.31938576.G.T	na	na	NoRepeat	0	298	2	467	0	508	89	359	0	399	1	437	0	144	2	323	0	442
chr4.126643011.T.C	na	na	NoRepeat	0	158	7	191	1	197	0	182	0	179	0	128	0	96	0	129	0	203
chr13.71494855.C.T	na	na	NoRepeat	0	302	0	334	0	302	0	263	13	270	0	288	0	159	69	257	0	295
chr8.142601563.T.A	na	na	NoRepeat	1	265	0	392	0	470	0	460	0	394	0	440	0	147	0	198	60	197
chr7.79661468.T.C	na	na	NoRepeat	0	219	0	325	0	342	0	302	0	256	42	282	0	216	0	254	0	351
chr2.211821877.T.A	na	na	NoRepeat	0	267	18	360	0	240	0	255	0	278	0	298	0	141	0	237	0	301
chr8.126731826.C.A	na	na	NoRepeat	0	330	14	712	0	1391	0	1000	0	448	60	856	37	338	0	570	0	478
chr5.158019163.G.C	na	na	NoRepeat	0	365	3	429	0	517	0	416	20	472	2	348	0	149	101	355	85	389
chr3.126035624.G.A	na	na	NoRepeat	0	126	1	126	0	69	0	96	7	119	0	91	0	44	45	97	17	89
chr2.125668941.C.G	na	na	NoRepeat	0	219	109	413	105	373	85	264	38	294	173	405	45	136	229	416	228	429
chr5.24136892.T.A	na	na	NoRepeat	0	288	1	415	101	438	0	318	1	263	0	407	0	266	0	611	0	308
chr16.83583071.G.T	na	na	NoRepeat	0	273	0	371	1	358	55	293	1	357	0	289	0	114	1	168	1	355
chr3.166010861.G.T	na	na	NoRepeat	0	181	103	422	102	388	76	391	14	267	175	376	93	274	140	367	200	427
chr4.156155917.A.C	na	na	NoRepeat	0	317	162	461	669	989	525	832	55	391	249	395	74	163	224	325	294	438
chr13.110414099.T.C	na	na	NoRepeat	0	238	76	363	144	411	103	304	19	293	134	326	87	199	169	245	151	445
chr14.99965213.G.T	na	na	NoRepeat	0	208	0	304	0	439	0	347	9	226	0	281	0	97	60	262	0	254
chr11.8461163.C.G	na	na	NoRepeat	0	313	64	315	79	311	87	275	10	286	128	237	58	131	74	297	83	296
chr2.229635454.T.A	na	na	NoRepeat	0	308	0	446	0	311	0	301	0	307	3	371	25	131	0	291	0	390
chr6.67269866.C.G	na	na	NoRepeat	0	272	0	381	139	465	0	355	0	346	0	228	0	137	0	302	0	266
chr8.137770009.C.G	na	na	NoRepeat	0	331	2	425	0	644	0	459	27	349	0	327	0	199	69	257	99	312
chr8.1577063.C.G	na	na	NoRepeat	0	159	0	200	99	348	0	198	0	213	0	155	0	70	0	94	0	111
chr3.153354294.G.T	na	na	NoRepeat	0	182	1	376	99	300	0	349	0	291	1	362	0	229	0	383	0	390
chr21.42110012.C.T	na	na	NoRepeat	0	155	3	327	4	507	0	279	1	224	54	262	0	146	0	211	0	260
chr10.95426066.T.A	na	na	NoRepeat	0	257	21	336	0	418	0	381	23	272	95	223	39	184	107	217	72	201
chr6.102057441.T.A	na	na	NoRepeat	0	227	118	310	146	433	131	346	52	305	124	173	85	111	244	248	173	213
chr1.182215087.G.A	na	na	NoRepeat	0	281	0	542	1	606	72	484	0	418	1	569	0	240	0	560	1	440
chr6.28598878.G.A	na	na	NoRepeat	0	265	0	556	0	671	98	534	0	385	0	650	0	380	2	624	0	595
chr16.1223401.G.T	na	na	NoRepeat	0	84	8	97	0	77	0	74	0	104	0	124	0	28	0	40	0	79
chr20.58206613.C.A	na	na	NoRepeat	0	300	0	552	0	359	77	269	0	474	0	742	0	230	0	436	0	594
chr9.86711589.C.T	na	na	NoRepeat	0	367	0	468	0	420	0	497	0	399	0	342	0	177	75	527	0	545
chr16.57521090.G.T	na	na	NoRepeat	0	66	0	79	0	89	10	76	0	82	0	52	0	16	0	30	0	42
chr13.50446180.G.A	na	na	NoRepeat	0	320	0	391	0	463	1	344	0	358	0	303	0	160	0	288	87	266
chr18.10824373.A.C	na	na	NoRepeat	0	358	101	467	0	721	0	597	12	455	123	411	31	201	102	345	207	484
chr2.62983023.G.A	na	na	NoRepeat	0	138	0	241	0	356	1	238	0	213	0	216	0	122	0	218	58	188
chr1.200996219.C.G	na	na	chr1_200996067_200996273	0	148	0	175	0	204	0	176	0	166	0	168	0	60	0	113	17	108
chr21.10645357.A.G	na	na	NoRepeat	1	901	0	1097	72	917	0	742	0	896	0	792	0	457	0	850	1	1070
chr16.79077206.A.G	na	na	NoRepeat	0	231	0	260	0	365	81	320	0	265	0	207	0	99	0	206	0	295
chr6.64410111.A.G	na	na	NoRepeat	0	280	0	353	133	398	0	373	0	358	0	250	0	140	0	293	0	237
chr5.113059180.A.T	na	na	NoRepeat	0	245	0	349	113	403	0	320	0	302	0	272	0	113	0	224	0	270
chr9.25070867.A.T	na	na	NoRepeat	0	413	0	458	0	639	199	593	0	476	0	306	0	232	0	486	0	361
chr10.92180674.A.T	na	na	NoRepeat	0	168	0	268	0	309	13	221	1	191	0	117	0	90	2	135	0	143
chr2.178439390.C.T	na	na	NoRepeat	0	258	0	301	113	350	0	247	0	293	0	352	0	109	1	246	0	289
chrX.46268790.C.A	na	na	NoRepeat	0	270	2	422	0	345	0	301	0	441	0	162	0	166	0	355	102	346
chr4.11304624.G.A	na	na	NoRepeat	0	302	0	470	0	509	0	540	0	385	0	540	0	213	0	570	86	648
chr13.44086811.G.C	na	na	NoRepeat	0	188	0	297	84	341	0	225	0	216	0	236	0	135	0	250	0	271
chr6.98735126.C.G	na	na	NoRepeat	0	312	0	335	0	385	85	256	0	313	0	171	0	101	0	325	0	205
chr11.34038012.G.A	na	na	NoRepeat	0	270	0	249	117	240	0	195	0	294	0	208	0	102	0	128	0	153
chr4.47472830.T.C	na	na	V$EVI1_02	0	508	1	1555	147	1295	0	1247	0	731	0	1558	0	937	0	1040	0	1660
chr5.148155279.G.C	na	na	NoRepeat	0	263	0	318	0	366	64	255	0	277	0	243	0	138	0	287	0	317
chr7.8439708.A.T	na	na	NoRepeat	0	482	34	531	0	642	0	534	0	518	0	575	0	317	0	615	0	405
chr13.92126570.A.T	na	na	NoRepeat	0	310	0	439	0	510	0	445	0	382	1	390	0	206	0	364	123	419
chr18.31247264.A.C	na	na	NoRepeat	0	262	6	261	108	338	86	247	1	244	0	156	0	94	0	148	0	186
chr4.87719441.A.T	na	na	NoRepeat	0	234	0	296	0	280	0	264	0	243	0	209	0	109	0	185	63	273
chr4.181054120.A.C	na	na	NoRepeat	0	275	0	385	0	171	0	134	0	281	34	264	0	161	0	296	0	371
chr4.127897404.T.A	na	na	NoRepeat	0	541	0	692	0	768	0	810	0	606	104	610	0	323	1	604	0	733
chr8.50557157.C.A	na	na	NoRepeat	0	252	0	313	88	338	69	276	0	222	0	375	1	147	0	296	0	321
chr4.84691428.A.T	na	na	NoRepeat	0	224	80	323	111	292	70	278	18	255	76	344	23	164	122	319	109	356
chr7.53177765.C.A	na	na	NoRepeat	1	256	107	398	1	442	0	374	34	337	166	392	87	186	220	420	188	396
chr8.48505155.G.A	na	na	chr8_48504459_48505208	0	149	1	267	58	342	39	257	0	175	1	291	0	121	0	295	0	230
chr13.106460833.G.A	na	na	NoRepeat	0	375	0	461	137	444	0	333	0	391	0	442	0	206	0	346	0	602
chr1.232599143.C.G	na	na	NoRepeat	0	271	80	366	1	333	0	339	18	326	99	267	36	105	80	180	152	183
chr10.83997904.A.T	na	na	NoRepeat	0	371	83	398	154	454	97	326	9	323	82	215	82	147	105	212	128	261
chr11.84052083.T.G	na	na	NoRepeat	1	437	0	543	0	672	0	603	0	362	0	474	0	227	0	398	105	496
chr9.77140378.T.A	na	na	NoRepeat	0	464	0	534	113	367	120	538	0	455	0	449	0	272	0	756	0	590
chr3.27680946.T.C	na	na	NoRepeat	0	471	0	560	0	453	0	342	0	487	0	369	0	183	0	147	111	271
chr3.177613605.T.C	na	na	NoRepeat	0	172	9	256	0	274	0	239	0	174	36	182	8	89	0	187	0	181
chr2.143136720.G.C	na	na	NoRepeat	0	210	0	367	86	314	79	237	0	274	0	299	0	113	0	240	0	332
chr3.157776164.C.T	na	na	chr3_157776047_157777391	0	225	0	292	0	503	0	358	14	260	0	248	1	153	71	226	0	259
chr12.94083349.A.G	na	na	NoRepeat	0	380	69	543	232	676	126	444	23	525	111	422	60	226	246	527	132	433
chr11.45540560.G.T	na	na	NoRepeat	0	296	1	487	0	587	0	362	26	449	0	537	1	231	83	267	0	275
chr1.233775096.C.T	na	na	NoRepeat	0	378	0	406	134	328	0	401	0	438	0	336	0	161	0	216	0	320
chr19.28677159.C.A	na	na	NoRepeat	0	326	0	512	0	383	89	435	0	423	0	456	0	143	0	317	0	468
chr5.174727005.G.T	na	na	NoRepeat	0	608	29	675	1	750	1	748	1	589	0	799	1	455	1	745	1	971
chr5.27095152.A.T	na	na	NoRepeat	0	156	22	319	0	393	0	229	0	218	49	262	32	194	0	457	0	306
chr1.6546436.C.T	na	na	NoRepeat	0	112	0	207	56	215	0	138	0	202	2	323	0	74	0	111	0	93
chr16.61072603.A.G	na	na	NoRepeat	0	161	82	231	168	261	108	172	15	188	102	186	35	85	126	198	100	168
chr13.58415006.T.C	na	na	NoRepeat	0	424	0	527	184	555	139	432	0	459	1	414	0	237	0	399	1	497
chr1.15544688.G.A	na	na	NoRepeat	0	317	0	340	0	382	0	262	0	315	0	304	0	106	0	281	68	284
chr19.16183845.C.A	na	na	NoRepeat	1	356	0	489	146	525	0	332	0	432	0	482	0	152	0	379	0	328
chr5.159333931.T.A	na	na	NoRepeat	0	509	31	641	0	648	1	524	1	664	135	473	45	190	3	414	0	393
chr10.111941081.G.C	na	na	chr10_111941058_111941275	0	95	0	130	0	179	0	123	0	137	0	85	0	42	0	99	21	89
chr1.174880601.A.G	na	na	NoRepeat	0	226	23	477	0	684	1	481	0	357	67	471	29	212	0	526	0	468
chr2.176017355.T.C	na	na	NoRepeat	0	324	0	471	0	459	34	324	0	361	0	367	0	150	0	311	0	436
chr14.68870104.T.C	na	na	NoRepeat	0	108	2	211	0	428	0	318	13	158	0	153	0	49	41	155	0	123
chr13.22605267.C.A	na	na	NoRepeat	1	330	0	491	0	473	80	385	0	365	0	387	0	214	0	377	0	441
chr18.69050763.G.C	na	na	NoRepeat	0	355	0	401	0	418	72	308	0	339	0	233	0	167	0	238	0	266
chr5.96770622.G.T	na	na	NoRepeat	0	339	91	402	1	493	1	395	32	374	147	316	67	134	109	214	146	264
chr21.20694035.G.T	na	na	NoRepeat	0	210	0	504	126	753	0	503	0	367	0	397	0	191	0	388	0	435
chr14.72713921.T.A	na	na	NoRepeat	0	166	0	202	0	379	0	203	16	209	0	146	0	79	43	153	26	128
chr6.42939412.T.A	na	na	NoRepeat	0	131	1	248	0	252	0	176	3	194	1	406	0	112	19	139	19	117
chr4.117383619.C.A	na	na	NoRepeat	0	264	0	441	0	431	64	401	0	358	0	288	0	155	0	304	0	424
chr8.123173271.T.C	na	na	NoRepeat	0	320	0	736	1	1111	0	830	0	376	0	681	53	382	0	541	0	391
chr6.99547382.A.T	na	na	NoRepeat	0	374	0	340	0	443	92	359	0	393	0	246	0	137	0	319	0	228
chr4.139222982.C.A	na	na	chr4_139222880_139223119	0	293	0	417	0	431	83	390	0	353	0	391	0	138	0	276	0	362
chr4.16237980.G.A	na	na	NoRepeat	0	395	0	587	0	543	0	367	21	448	1	514	0	196	107	471	0	517
chr3.167080149.T.A	na	na	NoRepeat	0	345	0	615	0	743	0	679	0	521	0	518	66	364	0	550	0	618
chr5.17931379.G.T	na	na	NoRepeat	0	409	1	569	0	743	2	447	0	433	215	542	0	321	0	872	1	379
chr15.46790007.T.C	na	na	NoRepeat	0	382	0	564	0	549	132	572	0	457	1	517	0	221	0	417	0	529
chr13.77428461.A.G	na	na	chr13_77428397_77428501	0	256	0	307	0	349	49	264	0	286	0	263	0	131	0	253	0	255
chr1.5426911.C.A	na	na	NoRepeat	0	131	20	211	0	240	0	184	0	177	45	276	14	91	0	146	0	149
chr5.16857029.T.A	na	na	NoRepeat	0	153	0	219	0	297	0	180	10	168	0	198	0	115	41	269	0	130
chr3.146184393.A.G	na	na	NoRepeat	0	184	1	277	0	324	0	337	11	233	0	203	1	159	52	169	0	221
chrX.63809761.G.C	na	na	NoRepeat	0	285	25	319	0	281	1	233	0	280	67	183	40	108	0	147	0	172
chr21.25375125.A.G	na	na	NoRepeat	1	290	0	387	0	468	0	345	0	296	0	373	0	199	43	354	0	394
chr2.161486828.A.T	na	na	chr2_161486542_161486835	0	168	20	330	0	302	0	242	19	278	59	300	22	144	62	225	80	327
chr11.60375294.T.A	na	na	NoRepeat	0	378	1	582	0	585	70	465	0	432	0	495	0	230	0	798	1	494
chr22.30582521.C.A	na	na	NoRepeat	0	318	0	383	0	419	102	309	0	367	0	385	0	179	1	399	0	362
chr7.134821452.C.T	na	na	NoRepeat	0	199	0	301	95	341	0	260	0	274	0	268	0	169	0	241	0	319
chr12.126148910.G.A	na	na	NoRepeat	0	345	26	459	0	508	0	413	26	429	86	364	70	218	116	417	111	351
chr17.71768420.C.T	na	na	NoRepeat	0	281	0	547	0	666	96	611	0	429	0	543	0	164	0	413	1	494
chr13.46455870.T.C	na	na	NoRepeat	0	772	1	865	0	783	141	720	0	809	0	821	0	358	1	738	0	753
chr1.93179993.G.C	na	na	NoRepeat	0	181	0	400	0	561	66	297	0	337	0	344	0	243	0	420	0	471
chr2.83047506.T.A	na	na	NoRepeat	0	210	25	311	0	239	0	286	5	167	52	226	15	106	47	162	54	199
chr13.21013038.T.C	na	na	NoRepeat	0	168	0	315	0	247	0	187	12	214	0	216	0	86	48	189	0	189
chr11.100985002.C.T	na	na	NoRepeat	0	486	0	820	3	717	150	846	0	533	0	617	0	237	0	331	0	702
chr14.97638539.G.A	na	na	NoRepeat	0	298	1	510	0	1049	80	660	0	385	1	503	0	213	0	415	0	412
chr5.147639931.A.T	na	na	NoRepeat	0	657	18	881	0	856	0	748	0	734	178	647	0	341	0	790	0	913
chr8.32711277.A.T	na	na	NoRepeat	0	260	0	451	0	772	0	463	15	343	0	302	0	200	104	306	0	323
chr7.81207251.C.T	na	na	NoRepeat	0	359	1	527	0	569	1	440	22	372	0	440	0	283	112	408	89	454
chr3.128626342.G.T	na	na	NoRepeat	0	95	0	118	0	105	34	119	0	159	0	142	0	35	0	72	0	66
chr10.21146566.G.A	na	na	NoRepeat	0	194	108	277	1	416	1	320	34	311	165	232	67	91	188	191	156	178
chr13.20511090.A.G	na	na	NoRepeat	1	213	4	275	0	251	0	229	5	222	1	258	0	106	55	235	54	238
chr7.28356686.T.A	na	na	NoRepeat	0	388	0	661	0	759	127	516	0	536	0	537	1	309	1	479	0	554
chr13.91551012.G.C	na	na	NoRepeat	0	282	17	349	0	335	0	259	0	256	62	244	36	127	0	227	0	226
chr8.93646456.G.T	na	na	NoRepeat	0	386	0	572	147	940	0	771	0	376	1	753	0	336	0	455	0	456
chr14.47980539.A.G	na	na	NoRepeat	1	224	0	415	0	373	41	275	0	290	0	464	0	250	0	467	0	471
chr12.132473835.G.A	na	na	NoRepeat	0	47	0	44	26	56	0	35	0	34	0	32	0	23	0	30	0	23
chr1.112512549.C.T	na	na	NoRepeat	0	496	0	545	139	707	0	586	1	638	0	712	0	303	1	559	0	612
chr3.149385463.T.C	na	na	NoRepeat	0	198	0	321	0	350	91	394	0	296	0	315	0	172	0	338	0	278
chr9.26851850.C.G	na	na	NoRepeat	0	298	0	282	0	294	0	330	4	243	0	161	0	84	60	185	0	158
chr4.90990426.G.T	na	na	NoRepeat	0	173	0	239	0	248	62	257	0	151	0	157	0	112	0	172	0	250
chr16.52967166.A.G	na	na	NoRepeat	0	117	1	153	0	201	0	152	0	149	2	118	19	67	0	118	0	118
chr9.89819230.G.C	na	na	NoRepeat	0	255	0	346	107	336	78	429	0	340	0	312	0	140	0	400	0	438
chr6.169782936.T.C	na	na	NoRepeat	0	391	1	469	0	336	0	195	21	376	0	444	0	159	74	163	0	294
chr22.27378032.G.A	na	na	NoRepeat	0	653	46	834	0	805	1	533	0	782	136	675	64	332	2	681	0	644
chr10.93302321.C.T	na	na	NoRepeat	0	353	0	396	155	490	0	352	0	378	0	264	0	157	0	250	0	190
chr3.169404216.T.G	na	na	chr3_169404161_169404496	0	246	1	516	1	729	16	545	0	391	0	425	0	248	0	486	0	491
chr17.16763967.C.A	na	na	NoRepeat	0	94	0	276	37	158	0	93	0	182	0	359	0	132	1	254	0	254
chr6.50241985.G.A	na	na	NoRepeat	0	462	0	846	0	616	0	495	0	531	0	905	0	478	0	755	169	767
chr11.102654854.A.G	na	na	NoRepeat	0	240	16	431	1	540	1	541	0	300	0	411	0	161	0	214	1	360
chr7.137595718.C.A	na	na	NoRepeat	0	343	0	425	0	521	0	363	0	390	4	401	32	182	0	320	0	410
chr3.193226600.C.A	na	na	NoRepeat	0	268	0	309	0	271	0	456	1	305	0	313	0	108	0	231	86	306
chr5.121074025.C.A	na	na	NoRepeat	0	151	40	286	65	323	60	266	0	197	39	229	16	122	57	228	40	246
chr21.18933341.G.C	na	na	NoRepeat	0	228	67	352	90	607	58	401	30	310	115	283	55	173	140	380	139	319
chr21.24319741.A.C	na	na	NoRepeat	0	185	0	352	73	337	0	274	0	238	0	258	0	135	0	309	0	306
chr3.70572526.T.C	na	na	chr3_70572460_70572622	0	453	0	656	0	558	0	367	0	542	9	389	45	180	0	355	0	399
chr18.55287704.C.A	na	na	NoRepeat	0	332	8	302	103	401	93	268	0	364	1	220	0	97	0	153	0	189
chr11.128636304.C.A	na	na	chr11_128636039_128636576	0	306	0	340	113	378	0	298	0	335	0	348	0	116	0	128	0	287
chr1.232040113.T.A	na	na	NoRepeat	0	204	12	323	0	297	0	315	12	279	70	197	31	96	74	162	0	195
chr14.49485538.A.G	na	na	NoRepeat	0	254	1	349	0	314	0	223	12	246	0	334	0	174	50	374	41	340
chr5.6783044.G.A	na	na	NoRepeat	0	406	31	328	0	335	0	267	0	332	0	355	0	246	0	522	0	232
chr21.23457695.A.C	na	na	NoRepeat	0	195	5	288	0	366	0	279	0	269	52	280	0	152	0	301	0	305
chr6.170602955.A.G	na	na	V$BRACH_01	0	182	0	248	0	312	0	151	9	216	0	290	0	70	37	64	0	155
chr1.176064154.C.T	na	na	NoRepeat	0	235	0	423	151	689	0	443	0	326	0	416	0	235	0	451	0	533
chr8.15876921.G.T	na	na	NoRepeat	0	477	0	653	207	1150	0	589	0	488	0	365	0	278	0	323	0	368
chr6.65683561.G.A	na	na	NoRepeat	0	208	7	214	0	238	0	182	17	206	0	107	0	60	116	175	63	135
chr2.192507525.A.G	na	na	NoRepeat	0	175	14	226	0	232	0	181	0	165	0	185	0	62	0	153	0	193
chr4.8479293.C.A	na	na	NoRepeat	0	55	4	86	0	103	0	85	0	55	13	97	0	29	0	64	0	78
chrX.79414043.G.A	na	na	NoRepeat	0	665	0	647	0	564	138	491	0	711	0	399	0	281	0	501	0	601
chr6.52460859.G.A	na	na	NoRepeat	0	261	0	409	0	365	90	259	0	326	0	419	0	197	0	253	0	264
chr8.74805108.G.T	na	na	NoRepeat	0	342	0	354	94	416	0	318	0	313	0	393	0	159	0	234	2	274
chr5.60904368.T.A	na	na	chr5_60904177_60904877	0	319	0	367	15	430	140	349	0	370	0	287	0	130	0	163	0	265
chrX.99431725.G.C	na	na	NoRepeat	0	227	0	281	0	302	0	207	0	286	0	147	0	86	0	121	71	94
chr15.26647164.A.T	na	na	NoRepeat	0	162	76	332	0	270	80	285	19	193	94	246	59	95	122	237	55	232
chr14.45373807.G.T	na	na	NoRepeat	0	126	0	209	40	197	0	141	0	131	0	222	0	115	1	203	0	213
chr20.31398965.G.T	na	na	NoRepeat	0	174	0	282	0	242	0	178	1	255	6	355	12	110	0	149	0	189
chr5.105525473.C.T	na	na	NoRepeat	0	163	0	245	0	241	0	202	0	167	0	183	25	92	0	131	0	167
chr13.81134161.G.C	na	na	NoRepeat	0	203	0	336	0	357	0	225	10	298	0	203	0	126	82	218	0	231
chr3.109024797.G.C	na	na	NoRepeat	0	233	1	242	0	146	0	126	9	206	1	157	0	68	35	144	39	140
chr1.189958760.C.T	na	na	chr1_189958761_189958899	0	150	31	404	0	576	0	377	0	313	0	323	3	175	1	439	0	414
chr14.86698745.G.A	na	na	NoRepeat	0	364	0	393	0	720	0	619	0	388	0	270	0	144	45	337	0	348
chr9.81241017.G.T	na	na	NoRepeat	0	709	0	579	0	516	0	653	0	531	0	463	43	200	0	783	0	690
chr11.21768061.C.A	na	na	NoRepeat	0	411	1	369	0	347	0	351	0	334	3	241	34	134	0	277	0	234
chr19.47552683.G.C	na	na	NoRepeat	0	46	0	75	30	79	0	41	0	56	0	61	0	26	0	41	0	45
chr19.6950152.A.T	na	na	NoRepeat	0	323	0	382	0	271	0	230	7	261	0	304	0	123	60	275	0	259
chr16.62092165.C.T	na	na	NoRepeat	0	442	0	453	137	451	0	349	0	453	0	318	0	159	0	357	0	388
chr7.6272716.C.T	na	na	NoRepeat	1	286	19	449	0	469	0	363	0	348	62	373	28	153	0	385	1	270
chr3.172561343.T.C	na	na	NoRepeat	0	203	9	258	0	358	0	283	0	201	41	205	27	99	0	273	0	203
chr21.45062390.C.T	na	na	NoRepeat	0	315	0	449	1	638	130	388	0	345	0	442	0	225	0	375	0	508
chr15.38205985.C.A	na	na	V$LUN1_01	0	229	0	395	0	376	99	392	0	316	0	340	0	129	0	377	0	322
chr2.7495384.A.T	na	na	V$HAND1E47_01	0	179	0	286	0	345	49	224	1	236	0	210	0	80	0	186	0	202
chr14.62638696.A.T	na	na	NoRepeat	0	632	35	591	0	1399	0	999	0	578	0	498	0	268	0	552	0	510
chr10.6361784.C.T	na	na	NoRepeat	0	326	26	547	0	1368	0	1009	0	378	50	716	40	286	0	413	0	336
chr2.113951014.T.C	na	na	NoRepeat	0	112	0	263	0	292	0	221	0	229	0	195	20	81	0	141	0	135
chr1.219512009.T.G	na	na	NoRepeat	0	359	0	347	122	268	0	291	0	352	0	238	0	100	0	391	0	222
chr8.68700962.A.G	na	na	NoRepeat	0	516	111	495	132	640	130	558	18	443	306	627	95	271	128	400	106	381
chr4.92007914.C.A	na	na	NoRepeat	1	243	30	467	0	482	0	449	17	285	2	272	46	218	86	286	89	404
chr6.11828416.A.G	na	na	NoRepeat	0	387	0	412	0	503	0	362	0	371	0	526	1	220	78	338	0	328
chr4.173455057.T.C	na	na	NoRepeat	0	135	0	249	0	214	39	357	0	195	0	194	0	75	0	165	0	186
chr6.37885496.C.A	na	na	NoRepeat	1	471	3	792	0	874	0	713	30	585	1	1162	0	550	149	974	138	902
chr8.63657627.A.T	na	na	NoRepeat	0	487	0	642	135	590	0	584	0	458	1	610	0	314	0	430	0	445
chr6.33415986.C.T	na	na	chr6_33415865_33416000	0	662	0	1019	1	1096	104	803	0	1039	1	1584	0	427	0	758	1	818
chr8.85309873.A.T	na	na	V$GATA1_05	0	259	0	640	121	994	0	735	0	391	0	515	0	267	0	439	0	442
chr1.217197928.A.T	na	na	NoRepeat	0	876	6	688	0	498	0	569	42	869	0	519	0	256	164	777	1	442
chr10.72134915.C.G	na	na	NoRepeat	0	121	1	183	0	188	0	141	0	188	5	122	10	51	0	64	0	70
chr10.26770052.C.G	na	na	NoRepeat	0	356	0	333	0	395	0	335	17	356	0	247	0	98	90	161	0	192
chr10.56671818.G.T	na	na	NoRepeat	1	253	0	394	88	641	0	547	0	327	0	305	0	190	0	305	0	368
chr11.80627490.T.C	na	na	chr11_80627221_80627519	0	182	0	451	78	532	0	434	0	265	0	360	0	180	1	570	0	504
chr4.108238372.T.A	na	na	NoRepeat	0	328	27	360	0	358	0	399	0	294	70	276	29	156	0	193	0	277
chr1.174304369.A.G	na	na	chr1_174304175_174304671	0	258	18	470	0	664	0	384	22	312	57	365	29	189	69	512	70	427
chr13.108707411.T.A	na	na	NoRepeat	0	319	27	397	0	387	0	252	14	275	72	336	34	165	81	255	81	556
chr4.117215198.T.A	na	na	NoRepeat	0	211	18	221	0	230	0	272	9	193	43	157	31	106	51	177	54	247
chr4.65140232.A.C	na	na	NoRepeat	0	213	0	340	0	301	0	332	0	248	5	297	35	167	0	303	0	304
chr9.134486447.C.T	na	na	V$POU3F2_02	0	262	0	240	0	208	0	278	12	276	1	233	1	104	45	147	0	169
chr10.76742010.C.A	na	na	chr10_76741781_76742176	0	186	0	221	0	270	0	198	0	221	0	132	0	76	0	132	42	114
chr4.11144528.G.T	na	na	NoRepeat	0	212	2	355	0	327	0	344	0	240	0	310	0	135	0	357	53	411
chr4.64688034.T.C	na	na	NoRepeat	0	290	0	431	0	375	0	404	0	343	0	338	0	281	0	374	116	571
chr1.27486365.C.A	na	na	NoRepeat	0	234	0	459	0	591	0	414	0	395	0	402	0	175	0	332	64	308
chr2.44796234.A.T	na	na	chr2_44796151_44796568	0	302	28	374	0	469	0	359	0	298	0	373	0	125	0	260	0	237
chr20.5890062.G.C	na	na	NoRepeat	0	342	0	486	0	537	0	404	17	339	1	532	0	219	84	334	0	485
chr4.160458715.T.C	na	na	NoRepeat	0	224	0	310	109	637	0	571	0	243	0	281	0	140	0	261	0	307
chr18.30295227.C.A	na	na	NoRepeat	0	214	0	301	0	398	0	323	0	283	0	186	0	110	0	220	76	199
chr1.157955677.A.G	na	na	NoRepeat	0	315	3	463	0	472	0	523	7	481	0	564	0	215	77	509	62	408
chr7.157749324.G.A	na	na	NoRepeat	0	144	0	169	0	176	0	128	0	166	27	198	0	57	0	146	0	129
chr1.106983594.G.A	na	na	NoRepeat	0	336	2	541	0	633	0	422	0	376	0	512	0	256	0	523	95	601
chr12.87220687.A.C	na	na	NoRepeat	0	179	2	258	0	306	0	230	0	215	55	222	0	100	0	380	0	305
chr11.32163913.G.T	na	na	NoRepeat	0	528	0	289	0	302	119	254	0	355	0	269	0	134	0	153	0	212
chr8.99369570.G.A	na	na	NoRepeat	0	184	0	517	0	898	90	601	0	309	0	557	0	234	0	351	0	283
chr1.99781168.C.A	na	na	NoRepeat	0	518	5	638	1	624	0	537	14	495	1	740	0	314	127	652	115	658
chrX.120171922.C.T	na	na	NoRepeat	0	530	0	446	0	442	0	365	0	546	0	256	0	111	168	173	0	225
chr7.136759827.C.A	na	na	NoRepeat	0	279	3	490	0	432	0	306	20	320	0	378	1	201	96	321	0	410
chr2.156634596.A.T	na	na	NoRepeat	0	215	0	270	85	277	1	217	0	208	0	229	0	89	0	159	0	303
chr4.163906464.C.A	na	na	NoRepeat	0	64	0	109	0	224	23	167	0	103	0	83	0	31	0	70	0	84
chr16.78584890.A.T	na	na	NoRepeat	0	224	1	242	0	349	0	241	14	285	0	217	0	124	41	99	58	292
chr11.19583495.A.T	na	na	NoRepeat	1	207	0	271	102	346	0	241	0	331	0	251	0	98	0	234	0	169
chr8.20041390.G.A	na	na	NoRepeat	0	439	0	541	0	978	149	487	0	440	0	330	1	259	0	276	1	243
chr13.29925669.C.G	na	na	NoRepeat	0	460	30	659	0	793	0	523	0	626	131	567	58	280	0	654	0	598
chr20.13512714.C.T	na	na	NoRepeat	2	622	1	1119	1	1075	0	857	33	722	0	1230	0	553	202	925	2	1206
chr3.77099805.A.T	na	na	NoRepeat	0	148	0	175	0	137	0	106	0	175	1	114	10	42	0	82	0	89
chr19.45342707.T.C	na	na	NoRepeat	0	348	0	341	0	289	0	275	0	346	0	301	0	73	59	164	0	241
chr6.45802783.A.T	na	na	NoRepeat	0	409	13	625	0	576	0	553	0	490	64	883	30	396	0	583	0	523
chr9.15754556.G.T	na	na	NoRepeat	0	377	0	339	0	446	0	496	17	362	0	210	0	120	106	313	0	235
chr16.8169393.C.T	na	na	NoRepeat	1	442	0	464	0	470	0	363	0	430	4	389	32	172	0	267	0	454
chr21.15923407.T.A	na	na	NoRepeat	0	198	0	393	0	633	66	474	0	287	0	394	0	210	0	413	0	423
chr5.152820432.T.A	na	na	NoRepeat	0	258	0	297	0	334	35	198	0	276	0	201	0	79	0	177	0	267
chr5.176201065.C.T	na	na	chr5_176201061_176201318	0	392	60	565	0	507	0	505	0	496	90	567	30	194	1	359	79	457
chr5.116713522.C.T	na	na	NoRepeat	0	271	1	306	84	358	0	181	0	270	0	155	0	91	0	96	1	167
chr8.96157492.G.T	na	na	NoRepeat	0	254	65	472	78	645	80	482	13	299	0	540	12	200	74	391	0	242
chrX.57858103.T.C	na	na	NoRepeat	0	267	0	240	0	189	0	145	0	235	0	110	0	89	0	142	64	167
chr12.71381045.A.T	na	na	NoRepeat	0	136	0	179	61	209	0	154	0	161	0	162	0	94	0	186	0	143
chr14.77324207.T.A	na	na	NoRepeat	0	644	7	561	0	610	0	506	0	602	82	421	0	203	0	427	0	406
chr12.122340174.G.A	na	na	NoRepeat	0	200	0	252	0	304	31	236	0	199	0	245	0	142	0	119	0	147
chr5.146656296.G.C	na	na	NoRepeat	0	323	74	375	121	454	107	363	40	363	87	300	33	154	175	290	177	371
chr1.13939228.G.A	na	na	NoRepeat	0	283	1	321	0	441	68	305	0	308	0	391	1	154	0	293	0	258
chr22.17443861.G.T	na	na	NoRepeat	0	107	2	199	0	296	0	180	3	186	0	253	0	75	30	155	30	139
chr14.52071635.T.A	na	na	NoRepeat	1	375	0	312	136	450	0	351	0	354	0	218	0	89	0	177	0	154
chr9.105915551.A.T	na	na	NoRepeat	0	219	36	307	88	295	112	328	9	236	40	216	17	122	72	290	57	321
chr5.98451576.C.G	na	na	NoRepeat	0	276	0	390	10	432	113	329	0	342	0	273	0	131	0	202	0	277
chr5.71790747.G.C	na	na	V$IRF1_01	0	270	0	388	0	460	0	405	0	322	2	302	39	143	0	253	0	259
chr2.44676629.A.T	na	na	V$TATA_01	0	283	26	319	1	407	0	290	0	281	54	305	30	139	0	239	77	255
chr2.144110317.A.G	na	na	NoRepeat	0	279	0	458	0	422	109	359	0	334	0	361	0	161	0	326	0	413
chr21.39300413.C.T	na	na	NoRepeat	1	299	0	362	0	446	83	358	0	301	0	296	0	152	0	299	0	323
chr11.37131028.T.A	na	na	NoRepeat	0	378	0	401	0	284	72	225	0	409	0	308	0	184	0	251	0	267
chr18.71402627.C.T	na	na	NoRepeat	1	417	29	384	0	453	0	419	0	372	73	261	65	149	0	240	0	276
chr19.35761930.T.C	na	na	NoRepeat	0	115	0	155	0	166	0	122	0	145	2	126	6	28	0	54	0	84
chr9.24059465.A.T	na	na	chr9_24059420_24059982	0	673	113	628	226	668	264	701	63	652	172	412	64	196	357	580	168	401
chr15.82038570.C.T	na	na	NoRepeat	0	229	1	499	0	576	1	507	0	306	5	583	29	258	0	393	0	375
chr21.30795262.G.A	na	na	NoRepeat	0	470	0	540	135	636	0	470	0	438	0	440	0	230	0	388	0	431
chr12.108311750.G.A	na	na	NoRepeat	0	240	0	405	0	549	0	329	22	369	0	324	1	141	98	280	0	269
chr11.27062077.G.A	na	na	NoRepeat	0	413	4	235	0	276	0	178	7	177	0	254	0	123	66	211	38	167
chr16.53755680.G.A	na	na	NoRepeat	1	264	49	365	0	425	0	341	0	339	0	297	0	171	0	267	0	302
chr14.90653449.C.T	na	na	NoRepeat	0	223	0	284	106	625	0	457	0	288	0	244	0	98	0	195	0	156
chr3.23153447.G.T	na	na	NoRepeat	0	214	6	408	0	311	0	261	1	297	47	334	34	176	0	346	0	364
chr10.65863963.G.A	na	na	NoRepeat	0	283	6	350	0	468	0	389	0	358	4	274	42	162	0	203	0	189
chr4.56982431.T.A	na	na	NoRepeat	0	265	0	468	0	698	1	481	11	367	0	403	0	222	94	368	0	465
chr4.167344586.A.C	na	na	NoRepeat	0	251	0	375	0	601	121	670	0	334	0	342	0	149	0	263	0	334
chr16.49610540.C.T	na	na	NoRepeat	0	174	14	259	0	304	0	228	6	247	60	241	37	113	41	129	32	150
chr10.36796870.T.C	na	na	NoRepeat	0	375	2	351	0	491	0	385	0	407	0	261	0	132	0	218	88	213
chr2.215186083.G.C	na	na	NoRepeat	0	298	0	385	0	201	0	279	0	296	0	309	0	147	0	265	61	333
[truncated: 14,756 more rows]
[truncated: 1 more columns]

## Sheet: SuppTable3
Supplementary Table S3. SJOS0011105 SNVs detected by capture validation and tumor purity
					Site:	D1	D1	D2	D2	R1	R1
					Tumor Purity:	0.55		0.43		0.53
					Anatomy:	Primary tumor at left proximal humerus	Primary tumor at left proximal humerus	Lung left upper lobe metastasis	Lung left upper lobe metastasis	Left distal femur metastasis	Left distal femur metastasis
Chrom.Site.Ref.Alt	Gene	AminoAcidChange	Class	Germline_MutantReads	Germline_TotalReads	D1_MutantReads	D1_TotalReads	D2_MutantReads	D2_TotalReads	R1_MutantReads	R1_TotalReads
chr2.202571714.G.T	ALS2	P1479T	missense	0	1401	0	1709	307	1967	0	1022
chr3.46725287.C.T	ALS2CL	K299K	silent	1	1043	0	806	0	1102	138	951
chr14.77274429.C.T	ANGEL1	G238R	missense	0	630	0	481	0	753	67	462
chr12.63540442.C.T	AVPR1A	E2_UTR_3	UTR_3	0	1476	241	996	219	1303	367	1075
chr10.124713900.A.T	C10orf88	E1_UTR_5	UTR_5	0	374	0	251	74	421	0	269
chr19.7743033.C.T	C19orf59	P76P	silent	0	848	146	662	99	790	223	796
chr22.24951103.G.A	C22orf13	E1_UTR_5	UTR_5	0	30	0	18	5	18	0	20
chr7.156432538.C.G	C7orf13	E1_exon	exon	0	515	0	544	0	774	61	623
chrX.15804085.C.A	CA5B	E8_UTR_3	UTR_3	0	73	16	81	0	29	0	23
chr22.17690252.G.C	CECR1	P106A	missense	0	1262	0	1075	242	1348	0	1297
chr13.100545719.C.T	CLYBL	E9_UTR_3	UTR_3	0	300	35	215	0	172	0	177
chr13.50465092.A.T	CTAGE10P	E1_exon	exon	0	306	0	175	72	280	0	223
chr4.4388115.G.A	D4S234E	E1_UTR_5	UTR_5	2	379	0	309	0	335	32	287
chr2.115919768.G.A	DPP10	E1_UTR_5	UTR_5	0	202	0	206	30	289	0	189
chr13.107145700.C.A	EFNB2	G230G	silent	2	1139	0	984	0	1205	155	765
chr13.107145699.T.C	EFNB2	I231V	missense	0	1102	0	946	0	1166	158	757
chr19.48229265.C.T	EHD2	Y233Y	silent	3	359	27	102	40	149	52	170
chr1.216692522.G.A	ESRRG	T368T	silent	0	1129	0	1042	0	1406	137	911
chr4.159593587.G.C	ETFDH	E1_UTR_5	UTR_5	1	487	0	412	113	766	140	424
chr6.159653053.G.A	FNDC1	K503K	silent	1	753	0	562	0	849	149	604
chr10.135439000.C.G	FRG2B	G147A	missense	0	859	115	644	127	785	183	662
chr16.27801998.G.C	GSG1L	E7_UTR_3	UTR_3	0	1034	296	1072	154	853	611	1557
chr22.46692769.C.G	GTSE1	E1_UTR_5	UTR_5	0	1459	271	999	344	1820	359	1337
chr3.50332325.C.T	HYAL3	A237T	missense	0	610	103	394	109	585	0	485
chr3.57127049.G.A	IL17RD	E13_UTR_3	UTR_3	0	1231	257	970	178	973	328	1046
chr22.37522608.T.A	IL2RB	E10_UTR_3	UTR_3	0	897	0	643	145	851	0	871
chr3.3144412.T.A	IL5RA	R59W	missense	0	1403	0	921	266	1282	0	1083
chr13.110437665.G.T	IRS2	R246S	missense	0	130	0	89	0	120	27	72
chr7.86541493.G.T	KIAA1324L	D688E	missense	0	879	0	1482	1	1279	118	821
chr2.241702439.C.G	KIF1A	R664R	silent	0	82	0	65	9	83	0	58
chr12.90951.C.T	LOC100288778	E7_exon	exon	0	41	0	35	5	32	0	29
chr15.89939028.G.T	LOC254559	E7_exon	exon	1	1048	0	939	3	1362	124	861
chr15.21934313.G.A	LOC646214	E1_exon	exon	0	1586	1	1673	76	2119	0	986
chr2.141747121.T.C	LRP1B	E917G	missense	0	1170	0	1112	0	1428	296	891
chr12.85546147.G.T	LRRIQ1	K1473N	missense	0	1738	0	1356	316	1898	0	1339
chr12.85546146.A.T	LRRIQ1	K1473M	missense	0	1725	0	1329	325	1878	0	1310
chr6.136667089.G.T	MAP7	P715Q	missense	0	1702	654	1128	524	1377	804	1223
chr2.240115642.G.C	MGC16025	E1_exon	exon	0	911	0	986	0	1035	136	780
chr3.97660884.G.A	MINA	E10_UTR_3	UTR_3	1	1504	0	1165	273	1565	0	1222
chr3.39556271.C.G	MOBP	E4_UTR_3	UTR_3	0	1353	0	1076	241	1406	0	1427
chr16.3591712.C.T	NLRC3	E20_UTR_3	UTR_3	0	356	0	167	62	292	0	283
chr1.200146077.G.T	NR5A2	E8_UTR_3	UTR_3	2	1198	0	1045	0	1519	125	941
chr1.200146076.C.G	NR5A2	E8_UTR_3	UTR_3	0	1204	1	1045	0	1529	127	925
chrX.91873412.C.T	PCDH11X	H1136Y	missense	0	707	283	626	194	672	219	450
chr5.140567985.T.C	PCDHB9	L365L	silent	1	341	59	251	25	106	57	338
chr10.93043460.G.A	PCGF5	E10_UTR_3	UTR_3	0	867	0	699	180	1026	0	649
chr4.39922007.G.T	PDS5A	Q223K	missense	1	1397	0	1415	0	1452	170	1492
chr1.167386215.C.G	POU2F1	E16_UTR_3	UTR_3	0	963	0	914	0	1433	157	821
chr14.102393686.T.G	PPP2R5C	E14_UTR_3	UTR_3	0	819	0	622	0	941	166	447
chr2.79255636.C.G	REG3G	UTR_3_E6splice_region	splice_region	0	585	97	410	0	459	125	434
chr3.129251217.C.G	RHO	I218M	missense	0	1069	0	697	0	1015	147	847
chr4.83550935.G.A	SCD5	E5_UTR_3	UTR_3	0	1777	0	2039	0	2355	213	1520
chr4.983963.C.A	SLC26A1	G255V	missense	0	125	0	115	0	141	19	98
chr2.40340360.G.A	SLC8A1	E10_UTR_3	UTR_3	0	1108	211	1038	228	1322	164	1124
chr2.40340003.G.C	SLC8A1	E10_UTR_3	UTR_3	0	1651	303	1563	214	1623	241	1636
chr13.86370190.C.T	SLITRK6	E152K	missense	0	1325	0	1009	0	1313	155	939
chr13.36909607.C.T	SPG20	D121N	missense	0	1361	250	938	236	1145	0	896
chr15.51023235.G.A	SPPL2A	S339L	missense	0	1282	0	1215	254	1182	0	1191
chr2.74087239.A.G	STAMBP	K393K	silent	2	1086	0	905	286	1285	0	1068
chr3.151599733.T.G	SUCNR1	E3_UTR_3	UTR_3	0	797	1	651	108	861	0	653
chr14.62463090.C.A	SYT16	S118Y	missense	0	1628	293	1127	0	1449	0	999
chr12.104732923.G.C	TXNRD1	V487L	missense	0	845	0	928	153	1054	0	819
chr4.103718128.G.T	UBE2D3	E8_UTR_3	UTR_3	1	747	0	739	116	885	7	571
chr15.50733604.G.C	USP8	D55H	missense	0	836	0	843	126	800	0	956
chr6.133073855.G.A	VNN2	P191S	missense	0	951	0	808	156	1106	0	965
chr3.55503432.C.G	WNT5A	E5_UTR_3	UTR_3	0	567	0	415	0	522	68	467
chr18.22807053.C.T	ZNF521	D277N	missense	0	934	0	728	154	867	0	802
chr19.56952886.T.C	ZNF667	H493R	missense	1	837	0	809	154	836	0	677
chr2.231662372.G.A	na	na	NoRepeat	0	1227	0	1222	0	1417	140	1343
chr5.178814578.C.G	na	na	NoRepeat	1	1416	521	950	430	1163	730	1058
chr6.124585693.T.C	na	na	NoRepeat	0	1394	227	873	178	1060	0	643
chr12.83543227.C.A	na	na	NoRepeat	1	1331	269	1120	0	871	0	949
chr21.9848767.C.A	na	na	NoRepeat	12	3747	10	2899	3	6648	911	4799
chr7.124465034.A.G	na	na	NoRepeat	0	1155	0	1140	0	1825	110	1110
chr2.222381556.G.C	na	na	NoRepeat	0	1272	0	1226	164	1276	0	1297
chr5.33309204.G.T	na	na	NoRepeat	6	1411	0	1493	237	1844	0	828
chr13.58288610.G.T	na	na	V$GATA1_02	1	1364	0	1037	281	1405	3	1022
chr16.61096619.C.G	na	na	NoRepeat	0	1234	434	779	381	1060	490	767
chr6.10095709.A.G	na	na	NoRepeat	0	1081	0	857	144	938	0	859
chr13.67624187.A.T	na	na	chr13_67623952_67624238	0	1101	0	743	0	1043	196	809
chr13.73251326.G.C	na	na	chr13_73251333_73251961	0	1598	0	1237	266	1840	0	1047
chr4.28008502.G.A	na	na	NoRepeat	0	1223	0	1003	0	1188	102	870
chr6.161666103.G.T	na	na	NoRepeat	0	1139	33	928	1	1354	6	374
chr2.139503456.G.T	na	na	NoRepeat	0	2286	399	1764	205	1378	388	1314
chr6.136812568.T.C	na	na	NoRepeat	0	1160	0	891	187	1178	0	1155
chr3.64881986.C.G	na	na	NoRepeat	0	1839	311	1357	249	1315	424	1314
chr14.68941391.G.T	na	na	NoRepeat	0	1549	322	1110	422	1520	2	1062
chr1.195016714.G.A	na	na	NoRepeat	0	746	0	763	0	941	83	609
chr2.240958486.C.A	na	na	NoRepeat	0	598	0	462	0	553	132	376
chr6.14789245.C.G	na	na	NoRepeat	0	1060	0	1008	0	1313	139	943
chr13.58269488.G.T	na	na	NoRepeat	0	1287	340	1123	7	1398	0	908
chrX.13798896.C.T	na	na	NoRepeat	0	1853	342	1508	301	1968	1	975
chr13.93524544.C.A	na	na	NoRepeat	1	1377	0	1232	2	1448	180	977
chr15.81647085.A.T	na	na	NoRepeat	0	1415	0	1411	1	1717	110	944
chr2.210242771.T.C	na	na	NoRepeat	0	1250	0	1224	226	1575	0	849
chr10.36509013.T.A	na	na	NoRepeat	0	916	0	683	194	1045	0	678
chr1.215116593.T.C	na	na	NoRepeat	0	1284	0	1177	0	1775	436	1162
chr14.27696616.G.A	na	na	NoRepeat	1	1427	4	1271	0	1872	377	1203
chr4.30644461.A.G	na	na	chr4_30644233_30644458	0	1231	0	1213	0	1369	274	1124
chr12.61851189.A.T	na	na	NoRepeat	0	1572	294	1212	222	1259	335	1143
chr14.28458848.C.A	na	na	NoRepeat	0	1524	238	1016	276	1037	318	1061
chr13.71012181.G.T	na	na	NoRepeat	2	1375	6	1119	198	1329	1	1053
chr9.18326644.T.A	na	na	NoRepeat	0	847	0	631	138	839	0	652
chr10.56138027.T.A	na	na	NoRepeat	0	377	0	240	0	488	52	303
chr14.43497070.C.T	na	na	NoRepeat	0	929	0	722	0	1295	92	817
chr10.94533819.T.C	na	na	NoRepeat	0	1356	357	1382	212	1266	222	1070
chr8.16004928.A.G	na	na	NoRepeat	0	1854	198	1282	0	1024	0	1299
chr13.107630687.A.C	na	na	NoRepeat	0	1702	235	1245	2	666	0	1102
chr10.92184674.C.T	na	na	NoRepeat	0	1981	376	1485	0	1403	0	1366
chr8.40261239.G.A	na	na	chr8_40261225_40261442	0	1066	0	1171	195	1052	5	1152
chr3.70409830.C.A	na	na	NoRepeat	0	1058	0	887	4	1222	273	845
chr1.238449212.G.T	na	na	NoRepeat	2	1687	280	1567	264	1663	0	1240
chr14.67527075.T.G	na	na	NoRepeat	0	823	0	588	0	973	95	545
chr15.57475204.G.T	na	na	NoRepeat	1	1099	0	1241	1	1416	178	871
chr2.134234075.C.G	na	na	NoRepeat	0	898	0	924	0	1005	105	637
chr3.36267400.G.T	na	na	NoRepeat	0	842	0	615	0	801	46	625
chr3.126217919.T.C	na	na	NoRepeat	0	796	0	548	0	802	98	695
chr12.74552695.A.T	na	na	NoRepeat	0	896	276	556	169	520	281	482
chr17.78645494.C.T	na	na	NoRepeat	0	750	193	655	182	743	222	837
chr13.63232669.A.T	na	na	NoRepeat	0	1023	0	803	222	1116	0	660
chr6.10242698.C.A	na	na	NoRepeat	0	605	0	526	140	630	0	458
chr2.44900734.A.G	na	na	NoRepeat	0	1278	0	1427	0	1595	294	1214
chr1.142578458.A.G	na	na	NoRepeat	0	152	0	120	17	143	0	107
chr10.103286723.A.T	na	na	chr10_103286719_103286832	0	1124	0	916	210	1281	0	877
chr17.30845856.C.T	na	na	NoRepeat	0	165	0	126	0	166	22	170
chr2.214544012.T.C	na	na	NoRepeat	0	357	0	282	61	418	0	209
chr13.97357913.C.A	na	na	NoRepeat	0	1212	211	914	197	1089	0	818
chr13.67447712.T.G	na	na	NoRepeat	0	1535	286	1055	209	1170	377	905
chr9.31768852.G.T	na	na	NoRepeat	0	877	197	962	195	942	523	888
chr12.73036714.C.A	na	na	chr12_73036479_73036911	3	1077	0	854	180	1172	0	870
chr1.237810744.T.A	na	na	NoRepeat	0	1021	0	859	0	1182	118	808
chr2.201112290.G.T	na	na	chr2_201112274_201112391	1	1499	0	1569	0	2033	221	1060
chr2.124735263.A.G	na	na	NoRepeat	0	632	1	647	0	763	169	533
chr13.89083650.T.A	na	na	NoRepeat	0	335	0	305	0	489	48	309
chr18.55685053.A.T	na	na	NoRepeat	0	299	0	304	68	341	0	298
chr7.133530863.A.C	na	na	chr7_133530850_133530952	0	1211	0	1316	3	941	277	1321
chr5.2170580.G.A	na	na	NoRepeat	0	478	0	410	64	443	0	257
chr5.27771467.C.T	na	na	NoRepeat	1	1678	377	2069	209	1975	402	1329
chr1.204918982.G.A	na	na	NoRepeat	0	1095	0	1129	0	1421	158	1037
chr2.80410821.C.A	na	na	V$POU6F1_01	0	734	0	594	2	861	41	618
chr5.180511900.G.A	na	na	NoRepeat	0	1018	0	704	1	902	127	820
chr3.111592615.C.G	na	na	NoRepeat	1	1571	332	1198	213	1096	416	1229
chr10.134061148.G.T	na	na	NoRepeat	0	404	0	300	61	365	0	259
chr2.225478284.C.A	na	na	NoRepeat	0	1133	0	1122	192	1141	0	1421
chr5.19226828.G.T	na	na	NoRepeat	0	1295	195	1428	204	1641	256	811
chr2.67803345.G.T	na	na	NoRepeat	0	1028	0	1051	0	1299	304	1231
chr13.76587894.A.G	na	na	NoRepeat	1	1831	652	1155	546	1326	792	1230
chr22.49497330.C.G	na	na	chr22_49497310_49497622	0	1320	3	1041	7	1048	0	711
chr10.25068537.A.G	na	na	NoRepeat	0	769	0	528	121	890	0	500
chrX.36158741.A.T	na	na	NoRepeat	0	2530	524	1892	350	2348	0	1280
chr4.28908882.T.C	na	na	NoRepeat	1	1335	1	1310	0	1449	222	1166
chr6.62590265.A.T	na	na	NoRepeat	0	1505	0	1572	246	1415	0	2070
chr1.179869903.A.T	na	na	NoRepeat	0	995	0	985	0	1286	139	816
chr11.49691846.G.C	na	na	NoRepeat	0	568	89	573	0	109	0	409
chr4.35660537.C.A	na	na	NoRepeat	2	1626	0	1644	299	1681	0	1525
chr3.41240683.C.T	na	na	CpG_CTNNB1_0	0	105	0	67	0	93	20	95
chr13.25721394.C.A	na	na	NoRepeat	0	470	0	398	93	517	0	349
chr4.39518775.A.C	na	na	NoRepeat	0	198	0	224	0	320	35	260
chr2.146356219.G.A	na	na	chr2_146356093_146356358	0	1032	1	1102	0	1474	195	989
chr2.123508096.A.C	na	na	NoRepeat	0	1234	0	1184	0	1244	220	861
chr2.83605952.C.A	na	na	NoRepeat	0	409	68	383	95	528	39	473
chr1.191139202.G.C	na	na	NoRepeat	0	649	0	742	0	1020	173	588
chr2.207133511.C.G	na	na	NoRepeat	0	1217	0	1183	0	1635	89	832
chr7.88122305.G.C	na	na	NoRepeat	0	1217	0	1904	0	1685	144	1257
chr2.163657060.T.A	na	na	NoRepeat	1	1927	0	1835	0	2289	238	1426
chr7.149523061.T.A	na	na	chr7_149522887_149523054	0	715	0	640	0	960	96	784
chr13.102292606.C.A	na	na	NoRepeat	0	1464	278	1141	223	1242	0	985
chr3.185800891.C.G	na	na	NoRepeat	0	724	0	820	203	988	0	703
chr6.15301470.C.G	na	na	NoRepeat	0	1920	343	1595	0	1096	436	1531
chr3.30861565.G.C	na	na	NoRepeat	0	980	1	803	0	1222	108	870
chr1.4613830.G.T	na	na	NoRepeat	1	1356	229	1064	4	1494	0	1516
chr18.65528015.A.C	na	na	NoRepeat	0	872	78	565	0	525	0	535
chr14.44541827.A.T	na	na	NoRepeat	0	457	0	372	0	588	134	367
chr6.151855549.C.A	na	na	NoRepeat	0	755	267	560	252	597	360	567
chr12.98559871.T.A	na	na	NoRepeat	0	1006	0	743	177	987	0	663
chr2.209951494.G.T	na	na	NoRepeat	0	1131	0	1050	0	1388	34	803
chr1.194531159.G.T	na	na	NoRepeat	1	1085	0	1019	3	1318	150	914
chr7.24646179.G.A	na	na	NoRepeat	0	43	0	58	9	68	0	59
chr2.67468265.G.C	na	na	NoRepeat	0	1387	298	1328	238	1355	678	1370
chr6.14749366.G.C	na	na	NoRepeat	0	1324	0	1543	0	1806	198	1380
chr13.71445555.A.G	na	na	chr13_71444987_71445558	0	1192	432	858	326	970	473	830
chr2.164731168.G.C	na	na	NoRepeat	0	1229	0	1149	0	1406	147	979
chr14.67319185.G.A	na	na	NoRepeat	0	644	0	486	0	877	101	522
chr6.65733683.A.G	na	na	NoRepeat	0	1743	620	1932	444	1266	723	2181
chr6.141481868.A.T	na	na	chr6_141481875_141482020	0	888	0	673	0	863	208	774
chr1.207826888.A.C	na	na	NoRepeat	0	1696	559	1391	575	1620	455	1262
chr1.196435327.T.C	na	na	NoRepeat	0	1057	0	930	0	1289	166	996
chrX.33327755.A.G	na	na	NoRepeat	0	882	141	585	90	640	0	329
chr2.228978008.T.A	na	na	NoRepeat	0	1841	615	1509	444	1175	1007	1396
chr13.78848090.C.A	na	na	NoRepeat	0	2017	329	1388	305	1727	0	1460
chr10.107743302.T.G	na	na	NoRepeat	0	1584	2	1217	213	1559	0	1000
chr7.105316813.T.A	na	na	NoRepeat	0	885	0	822	0	1127	99	958
chr3.56109793.T.A	na	na	NoRepeat	0	924	0	663	0	912	121	848
chr1.166720561.G.C	na	na	NoRepeat	0	630	0	679	0	872	163	552
chr13.90929958.C.A	na	na	NoRepeat	0	1231	0	953	173	1243	0	897
chr4.12298835.C.A	na	na	NoRepeat	0	1417	0	1294	184	1490	0	1283
chr10.106643827.G.C	na	na	NoRepeat	0	1249	0	908	205	1139	0	775
chr12.84941825.G.A	na	na	NoRepeat	0	1688	324	1087	194	1149	0	1009
chr6.15177349.G.A	na	na	NoRepeat	0	1395	1	1269	1	1422	194	1176
chr22.41953889.C.T	na	na	NoRepeat	1	1213	563	1026	455	1167	774	1148
chr21.25588823.A.G	na	na	NoRepeat	0	1323	449	1230	336	1109	613	1190
chr7.119990366.A.G	na	na	chr7_119990200_119990658	0	1385	0	1331	1	1700	323	1292
chr13.53909154.G.T	na	na	NoRepeat	0	1508	240	1109	0	934	0	1101
chr10.133193037.A.T	na	na	NoRepeat	0	788	0	702	194	1030	0	589
chr3.12539003.G.A	na	na	NoRepeat	0	989	0	759	0	1070	160	897
chr3.46563508.T.A	na	na	NoRepeat	0	1312	0	846	2	1430	172	1171
chr4.10149467.A.G	na	na	NoRepeat	0	996	0	950	0	891	142	812
chrX.29049708.C.T	na	na	NoRepeat	0	1123	33	981	154	1303	0	624
chr13.60300195.T.G	na	na	NoRepeat	0	1357	552	973	433	1133	500	822
chr13.106386639.C.A	na	na	NoRepeat	0	973	0	737	0	916	131	648
chr2.76867705.T.A	na	na	NoRepeat	0	1526	291	1013	261	1090	222	1088
chr1.226376860.C.A	na	na	chr1_226376525_226376968	0	826	0	816	0	914	127	735
chr6.15300476.C.A	na	na	NoRepeat	1	2438	426	2286	0	2035	669	1884
chr4.17261747.T.A	na	na	NoRepeat	0	741	0	753	0	787	189	672
chr13.91890553.A.T	na	na	NoRepeat	0	1133	0	1006	0	1297	163	925
chr3.55670902.G.C	na	na	NoRepeat	0	889	0	851	0	1136	112	862
chr18.49702030.C.A	na	na	chr18_49701912_49702394	2	1282	0	956	0	927	274	772
chr3.16223065.C.T	na	na	NoRepeat	0	1218	0	827	0	1250	167	1054
chr13.46865629.A.G	na	na	NoRepeat	0	988	0	852	0	1126	235	753
chr18.63699042.C.A	na	na	NoRepeat	0	883	0	705	179	957	0	635
chr13.81084410.T.G	na	na	chr13_81084348_81084559	0	1092	0	836	2	1037	356	814
chr13.77286266.T.C	na	na	NoRepeat	1	1656	300	1150	251	1359	0	1123
chr10.63868635.G.T	na	na	NoRepeat	0	919	0	587	125	836	1	485
chr14.83260523.C.T	na	na	NoRepeat	1	1924	250	1331	0	1608	0	1122
chr3.9390930.C.T	na	na	chr3_9390102_9390920	0	260	0	233	40	270	0	264
chr10.84236775.C.A	na	na	NoRepeat	0	1056	231	744	0	728	0	651
chr10.78401260.A.T	na	na	chr10_78401180_78401356	0	1295	0	1152	233	1406	0	1045
chr5.25609063.G.T	na	na	NoRepeat	3	1596	266	1331	170	1279	384	986
chr18.27860003.C.A	na	na	NoRepeat	0	515	0	481	70	585	0	421
chr18.43347937.A.T	na	na	NoRepeat	0	936	194	760	132	731	196	615
chr7.119123904.T.C	na	na	NoRepeat	1	1572	0	1556	0	1989	107	1470
chr7.88715624.A.T	na	na	NoRepeat	0	1105	0	1719	0	1569	154	1162
chr22.49497443.G.A	na	na	chr22_49497310_49497622	0	1266	218	1262	163	1265	0	621
chr13.28902804.C.T	na	na	NoRepeat	0	850	0	627	110	743	1	642
chr13.94321679.A.C	na	na	NoRepeat	0	1310	0	1232	0	1755	175	1127
chr2.83606387.C.T	na	na	NoRepeat	0	1544	308	1576	187	1462	228	1585
chr6.47845585.G.T	na	na	chr6_47845524_47845641	0	64	0	171	0	151	19	218
chr22.49550568.C.T	na	na	chr22_49550562_49550803	0	1112	1	1130	194	1383	4	333
chr3.163375424.T.C	na	na	NoRepeat	0	1282	0	984	294	1445	0	1234
chr3.111634660.T.C	na	na	NoRepeat	0	1163	0	811	0	1190	301	939
chr15.38233790.G.C	na	na	NoRepeat	0	1352	1	1379	188	1241	0	1023
chr7.108108016.T.A	na	na	chr7_108107894_108108210	0	1229	0	1142	0	1635	264	1247
chr4.22105647.G.T	na	na	NoRepeat	0	925	0	815	0	922	155	708
chr2.92256359.G.T	na	na	NoRepeat	11	1416	6	1299	3	1491	6	1332
chr3.43251823.C.T	na	na	chr3_43251811_43251970	0	1034	0	758	192	1063	0	1026
chr10.108634422.G.T	na	na	NoRepeat	0	1430	221	939	168	1038	0	966
chr5.27771136.C.G	na	na	NoRepeat	0	1217	224	1324	163	1254	224	690
chr13.90878846.C.A	na	na	NoRepeat	0	2045	369	1496	262	1637	0	1445
chr8.1283399.G.T	na	na	NoRepeat	0	700	146	523	117	529	0	714
chr4.14351071.G.T	na	na	NoRepeat	0	1500	259	1241	227	1131	297	1096
chr18.77594908.C.A	na	na	NoRepeat	0	1253	272	1001	2	1145	0	846
chr7.116055192.T.A	na	na	NoRepeat	0	1346	229	1137	182	1350	342	1210
chr7.136215122.A.G	na	na	NoRepeat	0	1013	0	951	0	1560	237	1029
chr16.59895342.G.T	na	na	V$FREAC7_01	1	1803	379	1332	3	1581	0	1275
chr1.238451408.G.A	na	na	NoRepeat	0	1198	0	1102	2	1440	165	1045
chr7.95530863.C.T	na	na	NoRepeat	0	1114	0	1149	0	1601	155	1282
chr18.37396442.T.A	na	na	NoRepeat	0	1038	0	866	166	1082	0	764
chr7.154151854.G.T	na	na	NoRepeat	0	922	0	972	0	1240	222	916
chr10.53020525.C.T	na	na	NoRepeat	1	1163	388	703	313	877	460	762
chr14.79211073.C.T	na	na	NoRepeat	0	777	0	558	0	880	115	519
chr2.231447107.G.T	na	na	NoRepeat	0	1210	2	1184	0	1205	168	1239
chr3.59071482.T.G	na	na	NoRepeat	0	1361	0	1073	0	1686	226	1218
chr2.197245817.G.A	na	na	NoRepeat	4	1198	0	1192	246	1325	0	731
chr6.10242699.T.C	na	na	NoRepeat	0	597	0	500	135	610	0	446
chr1.238698862.C.G	na	na	NoRepeat	0	1104	0	959	0	1172	263	859
chr2.174027105.G.T	na	na	NoRepeat	0	771	0	713	0	877	154	508
chr10.63484418.G.T	na	na	NoRepeat	0	1506	80	934	223	1420	227	808
chr10.58212967.A.T	na	na	NoRepeat	0	762	0	499	129	749	0	339
chr3.146398206.A.G	na	na	NoRepeat	0	970	178	655	141	763	243	687
chr7.131969350.G.C	na	na	NoRepeat	0	860	0	764	0	1169	103	917
chr10.50635249.C.T	na	na	NoRepeat	2	1287	34	851	0	1307	0	867
chr13.35668264.A.G	na	na	NoRepeat	0	957	130	603	0	862	0	687
chr10.103043410.C.A	na	na	NoRepeat	0	451	0	338	69	453	0	256
chr3.35872778.A.T	na	na	NoRepeat	0	919	0	730	128	941	1	793
chr2.229431838.T.A	na	na	NoRepeat	0	1451	0	1316	282	1458	0	1737
chr3.20430852.T.C	na	na	NoRepeat	0	994	0	757	0	997	55	727
chr15.48801301.G.A	na	na	NoRepeat	0	1216	0	1298	0	1272	74	960
chr19.23834429.T.G	na	na	NoRepeat	0	167	0	110	24	171	0	103
chr8.34123124.T.A	na	na	NoRepeat	0	1190	0	977	182	1134	0	710
chr3.55853902.C.A	na	na	chr3_55853826_55854107	0	1040	0	855	156	928	0	911
chr13.69904075.A.T	na	na	NoRepeat	0	904	0	719	192	1003	0	582
chr3.11045911.C.A	na	na	NoRepeat	0	1694	1	1275	281	1598	0	1420
chr14.94346713.C.T	na	na	chr14_94346620_94346757	0	432	0	336	0	524	55	335
chr4.23961087.C.T	na	na	NoRepeat	0	833	0	805	0	922	197	707
chr15.74146990.C.T	na	na	NoRepeat	0	1042	1	1126	0	1207	153	905
chr5.27774030.C.G	na	na	NoRepeat	0	1691	253	1878	194	1545	300	1000
chr15.54401026.G.A	na	na	NoRepeat	0	1056	0	1103	187	973	0	748
chr6.14949149.G.A	na	na	NoRepeat	0	1390	3	1183	0	1288	166	1083
chr15.88485118.T.G	na	na	chr15_88484910_88485164	0	1431	0	1530	0	1663	235	1313
chr10.127217948.C.T	na	na	NoRepeat	0	951	202	664	0	635	0	546
chr12.85744775.G.T	na	na	chr12_85744717_85744851	0	977	129	593	141	782	1	669
chr2.156446285.T.C	na	na	V$PBX1_02	0	986	0	1068	0	1257	212	777
chr4.182439338.C.T	na	na	chr4_182439039_182439466	1	1419	536	1368	179	1334	401	1198
chr18.35147571.G.A	na	na	CpG_CELF4_0	0	254	0	158	41	225	0	178
chr10.11751613.C.T	na	na	NoRepeat	0	1028	0	716	147	1152	2	715
chr2.81026206.C.G	na	na	chr2_81025912_81026361	0	767	0	575	0	772	62	627
chr13.104368282.G.T	na	na	NoRepeat	0	1209	2	986	150	1183	0	862
chr3.21869494.T.G	na	na	NoRepeat	0	1479	0	1064	0	1414	201	1128
chr13.54216767.C.T	na	na	V$LHX3_01	0	1417	0	1214	201	1451	0	1107
chr11.49691864.G.C	na	na	NoRepeat	0	577	88	564	0	78	0	390
chr3.37164542.G.C	na	na	NoRepeat	0	1131	0	1012	194	1398	0	1112
chr15.76327812.G.C	na	na	NoRepeat	0	888	1	1019	0	1231	121	800
chr4.4158527.G.T	na	na	chr4_4158371_4158535	0	144	0	128	0	112	6	114
chr5.398125.C.T	na	na	NoRepeat	0	1363	18	1020	33	1423	0	556
chr7.116175941.T.C	na	na	NoRepeat	0	1492	0	1585	2	2282	413	1636
chr3.39571270.G.T	na	na	NoRepeat	0	988	0	762	245	1056	0	896
chr18.72206701.C.T	na	na	NoRepeat	0	484	100	382	0	526	0	351
chr2.210263514.C.A	na	na	NoRepeat	0	981	0	942	3	1269	91	535
chr2.82514042.C.A	na	na	NoRepeat	0	1563	240	1182	0	1107	0	1243
chr1.194531158.A.G	na	na	NoRepeat	2	1083	0	1007	1	1322	149	906
chr3.10800436.A.C	na	na	NoRepeat	0	544	0	425	0	563	43	475
chr2.72079181.G.A	na	na	NoRepeat	0	821	0	559	117	625	0	1041
chr12.54893264.C.T	na	na	chr12_54893112_54893305	0	1403	1	1200	286	1633	0	1211
chr1.214183799.G.T	na	na	chr1_214182901_214183796	0	1294	0	1383	1	1539	377	1163
chr14.49097912.C.A	na	na	chr14_49097834_49098130	0	1083	0	732	0	1145	142	904
chr1.217144984.G.A	na	na	chr1_217144885_217145133	2	1223	328	989	217	967	210	766
chr6.63140166.C.T	na	na	NoRepeat	0	1433	35	1452	195	1467	1	2100
chr1.171614854.G.A	na	na	NoRepeat	0	871	0	712	0	1017	134	754
chr7.144992847.A.C	na	na	NoRepeat	0	1933	1047	1669	467	2087	361	1787
chr10.103543518.C.T	na	na	NoRepeat	0	870	0	724	165	885	0	664
chr20.59205931.C.T	na	na	NoRepeat	1	678	263	569	184	697	193	460
chr3.27475861.C.T	na	na	NoRepeat	0	739	0	555	93	887	0	655
chr16.51646073.A.T	na	na	NoRepeat	0	942	1	909	147	1134	0	705
chr2.42220237.C.T	na	na	V$GATA1_03	0	1354	0	1506	0	1803	168	1432
chr3.106348685.G.A	na	na	chr3_106348495_106348802	0	1025	0	836	198	1116	0	733
chr4.49503220.G.C	na	na	NoRepeat	0	57	10	35	0	47	0	35
chr2.60610349.C.T	na	na	chr2_60610287_60610716	1	1382	1	1368	2	1770	219	1557
chr1.217578801.A.G	na	na	chr1_217578593_217578849	1	1462	0	1374	2	1773	493	1283
chr2.234261153.T.A	na	na	NoRepeat	0	1083	1	1033	1	1251	100	962
chr1.208414292.C.T	na	na	chr1_208414237_208414376	0	1053	0	949	0	1144	335	953
chr19.32617156.C.T	na	na	NoRepeat	0	195	0	169	0	170	65	163
chr18.45482209.G.A	na	na	NoRepeat	0	1038	367	691	256	763	285	515
chr8.113817383.G.T	na	na	NoRepeat	0	488	0	688	102	718	1	551
chr3.17651142.C.A	na	na	NoRepeat	0	1518	0	1136	0	1659	419	1263
chr15.78080227.C.T	na	na	NoRepeat	0	1333	0	1115	0	1490	140	1034
chr3.122134909.T.A	na	na	CpG_WDR5B_0	0	914	0	736	0	1208	80	660
chr6.7517554.C.A	na	na	chr6_7517554_7517660	0	1561	0	1412	0	1563	144	1246
chr3.67228663.A.G	na	na	NoRepeat	0	1446	0	1056	0	1303	90	1215
chr13.97474587.C.T	na	na	chr13_97474265_97474848	0	863	143	684	0	743	1	597
chr12.52543917.G.A	na	na	NoRepeat	0	1153	0	930	178	1106	0	2238
chr3.163231338.A.T	na	na	NoRepeat	0	1425	267	1042	234	1242	0	1339
chr2.82365705.G.A	na	na	NoRepeat	12	1719	360	1373	15	699	438	1389
chr2.186007828.G.C	na	na	NoRepeat	0	831	0	738	1	936	79	582
chr16.20032794.C.T	na	na	NoRepeat	0	1754	323	1458	229	1159	705	1821
chr10.37220727.G.C	na	na	NoRepeat	0	745	10	480	164	939	0	657
chr10.127699063.A.T	na	na	NoRepeat	0	1287	0	995	261	1376	0	1000
chr7.103356661.C.T	na	na	NoRepeat	0	1180	3	1126	0	1567	137	1406
chr6.105995565.T.A	na	na	NoRepeat	0	2265	902	1617	539	1495	1504	2038
chr2.82120948.C.A	na	na	NoRepeat	0	1340	0	1090	217	1329	0	1169
chrX.34730813.G.T	na	na	NoRepeat	3	1974	336	1439	202	1232	0	932
chr2.222610600.A.C	na	na	chr2_222610495_222610655	0	1339	0	1328	288	1502	0	1262
chr7.110021239.A.G	na	na	NoRepeat	0	640	48	808	71	996	177	708
chr14.85046166.G.T	na	na	NoRepeat	0	1437	283	1112	0	1377	0	934
chr14.28432354.G.T	na	na	NoRepeat	0	997	135	694	1	1153	3	806
chr10.37821269.C.T	na	na	NoRepeat	0	1081	228	693	155	739	299	663
chr14.86431408.T.G	na	na	NoRepeat	0	1040	0	935	0	1390	111	875
chr2.129592994.A.C	na	na	NoRepeat	0	593	0	604	0	630	199	467
chr18.49436465.G.A	na	na	NoRepeat	0	1248	1	1070	207	1201	0	929
chr3.45406890.A.G	na	na	NoRepeat	0	1041	0	789	0	1109	283	935
chr12.75138407.T.A	na	na	NoRepeat	0	2021	386	1684	2	1820	0	1390
chr6.153660863.T.G	na	na	NoRepeat	0	1115	79	808	0	733	1	976
chr1.183003913.T.A	na	na	NoRepeat	0	1265	0	1126	0	1405	164	934
chr12.107767667.C.T	na	na	NoRepeat	0	576	1	472	110	619	0	468
chr6.63384287.T.A	na	na	NoRepeat	0	452	0	436	0	411	53	589
chr7.151377648.T.C	na	na	NoRepeat	0	971	0	1105	0	1468	213	1109
chr15.45278593.G.A	na	na	NoRepeat	0	817	0	833	0	782	107	709
chr2.174440488.A.G	na	na	chr2_174440371_174440481	0	1355	0	1394	0	1803	95	1052
chr6.136671162.G.A	na	na	NoRepeat	0	1327	563	986	411	1149	697	1066
chr6.99038004.G.C	na	na	NoRepeat	0	1118	0	657	0	969	225	715
chr8.32175684.T.C	na	na	NoRepeat	0	1432	320	1180	185	1016	339	732
chr13.27341878.G.C	na	na	NoRepeat	1	1533	261	1143	1	1213	1	1163
chr3.30358605.C.A	na	na	NoRepeat	0	1566	627	1089	405	1110	721	1089
chr17.12402117.C.T	na	na	NoRepeat	0	1438	0	1628	300	1394	0	1451
chr5.27774060.C.G	na	na	NoRepeat	0	1676	233	1875	162	1485	266	938
chr2.124274889.C.A	na	na	NoRepeat	0	464	0	495	0	629	126	361
chr7.97496891.C.G	na	na	NoRepeat	0	1116	0	1004	0	1389	257	1085
chr21.22648384.T.G	na	na	NoRepeat	0	1055	0	1227	187	1513	0	1199
chr18.38835826.C.G	na	na	chr18_38835515_38835847	0	922	0	692	203	1013	0	620
chr7.154156155.T.C	na	na	NoRepeat	0	969	0	1037	142	1366	175	939
chr13.40849268.A.T	na	na	NoRepeat	0	545	0	332	94	511	0	398
chr6.146546493.G.T	na	na	NoRepeat	0	2096	323	1331	485	1674	227	1533
chr3.128215504.C.G	na	na	CpG_GATA2_3183	3	1245	0	871	0	1302	187	1129
chr10.50556443.A.T	na	na	NoRepeat	0	673	0	359	116	688	0	453
chr7.118219443.A.T	na	na	NoRepeat	0	872	0	915	4	655	106	963
chr6.143544095.G.T	na	na	chr6_143543800_143544252	4	963	0	769	2	1257	184	982
chr3.2693055.C.T	na	na	NoRepeat	0	1353	5	1001	2	1452	166	1117
chr3.19918475.T.C	na	na	NoRepeat	0	1341	0	1018	0	1326	381	1167
chr13.72303662.C.A	na	na	NoRepeat	0	1218	0	923	227	1235	0	759
chr7.154151851.G.C	na	na	NoRepeat	0	931	1	972	0	1268	228	931
chr3.61169983.A.G	na	na	chr3_61169897_61170001	0	1086	0	912	215	1089	0	1011
chr3.108596556.C.G	na	na	chr3_108596396_108596573	0	1029	0	756	0	1049	124	808
chr13.24585875.G.A	na	na	NoRepeat	0	691	0	479	0	609	81	471
chr6.141041470.A.G	na	na	chr6_141041451_141041625	0	1000	182	829	0	956	0	835
chr3.50583339.C.T	na	na	NoRepeat	0	749	0	539	0	635	73	615
chr4.37425757.A.C	na	na	NoRepeat	1	1416	707	1479	3336	4394	520	1336
chr10.84342660.C.A	na	na	chr10_84342611_84342888	0	1820	0	1496	321	1552	0	1221
chr16.51495652.A.G	na	na	NoRepeat	1	969	0	829	246	978	0	701
chr12.79180514.G.C	na	na	chr12_79180385_79180517	0	1260	0	958	216	1332	0	976
chr7.86326309.C.G	na	na	NoRepeat	0	2289	1333	3520	757	2705	516	2200
chr2.228536304.T.A	na	na	NoRepeat	0	912	0	816	0	987	366	1020
chr2.57346292.A.G	na	na	NoRepeat	0	834	136	571	0	661	0	674
chr18.20139453.T.C	na	na	chr18_20139351_20139734	0	604	0	429	164	642	0	535
chr18.72773378.T.G	na	na	NoRepeat	0	1018	0	846	160	1174	0	650
chr10.132268877.C.A	na	na	chr10_132268784_132268931	1	752	0	587	123	635	0	397
chr3.179609266.C.T	na	na	NoRepeat	2	1828	941	1507	740	1524	901	1281
chr3.124321300.G.A	na	na	V$TAL1BETAITF2_01	0	1213	1	850	2	1274	144	1054
chr3.127013141.G.A	na	na	NoRepeat	0	1380	0	986	0	1316	211	1095
chr3.6458104.T.A	na	na	NoRepeat	0	647	0	483	101	646	0	514
chr3.64881985.G.T	na	na	NoRepeat	1	1829	268	1283	235	1290	399	1289
chr13.88002493.C.A	na	na	NoRepeat	0	649	2	495	0	663	121	516
chr3.49824030.C.G	na	na	CpG_IP6K1_0	0	662	0	501	0	697	215	630
chr3.131720282.G.A	na	na	NoRepeat	0	1097	0	945	212	1200	0	1142
chr13.38066094.G.T	na	na	NoRepeat	0	1823	707	1319	620	1455	816	1336
chr12.74290474.A.G	na	na	NoRepeat	1	1526	338	1149	0	1152	0	1089
chr8.114979686.C.A	na	na	NoRepeat	0	75	0	92	0	71	20	99
chr2.115408654.A.T	na	na	NoRepeat	0	1441	0	1632	0	1782	142	1220
chr15.20889091.T.C	na	na	NoRepeat	0	456	0	455	112	649	0	132
chr1.232709341.A.G	na	na	NoRepeat	0	989	0	948	1	1131	297	843
chr10.110385619.C.G	na	na	NoRepeat	0	1914	421	1471	266	1164	1	1276
chr18.76190360.C.A	na	na	chr18_76190112_76190709	0	1073	0	873	138	1028	0	696
chr10.1235039.C.G	na	na	NoRepeat	0	806	83	462	110	616	0	428
chr1.197299998.A.C	na	na	NoRepeat	0	518	1	411	2	622	80	419
chr6.153586429.C.A	na	na	NoRepeat	0	2115	218	1235	0	1673	5	1475
chr13.90838660.G.T	na	na	NoRepeat	0	901	152	594	78	740	1	465
chr3.2822359.C.A	na	na	NoRepeat	0	1534	0	1266	0	1664	195	1344
chr6.121525269.C.G	na	na	NoRepeat	0	1732	270	1163	207	1260	0	640
chr11.49691782.G.C	na	na	NoRepeat	0	549	83	641	0	267	0	519
chr10.115387711.A.G	na	na	NoRepeat	0	1097	0	748	191	1132	0	747
chr13.76269439.G.C	na	na	NoRepeat	1	1229	0	943	0	1265	281	713
chr13.91716145.G.T	na	na	NoRepeat	0	1024	1	697	173	910	0	607
chr2.217133728.C.G	na	na	NoRepeat	0	692	0	691	0	771	89	441
chr6.67471217.C.G	na	na	NoRepeat	0	874	176	431	124	675	362	557
chr10.25930598.A.G	na	na	chr10_25930574_25930810	1	1343	0	976	268	1454	0	796
chr13.19219401.T.G	na	na	NoRepeat	0	255	0	215	0	225	71	185
chr14.53021311.G.A	na	na	chr14_53021272_53021445	1	1001	0	879	0	1503	175	908
chr18.32461473.G.C	na	na	NoRepeat	0	669	105	505	72	314	65	406
chr6.150518660.G.T	na	na	V$TAL1ALPHAE47_01	0	1302	0	959	1	1599	212	1136
chr11.35850261.A.C	na	na	NoRepeat	0	674	0	905	135	762	0	873
chr2.141471477.G.T	na	na	NoRepeat	0	1311	0	1249	1	1478	262	907
chr8.299203.G.T	na	na	NoRepeat	1	1164	176	788	0	914	0	850
chr7.116292397.C.T	na	na	chr7_116292376_116292477	0	1736	0	1706	0	2371	210	1956
chr7.154416786.G.T	na	na	NoRepeat	0	1138	0	1023	0	1514	232	1094
chr3.2443139.C.G	na	na	NoRepeat	0	1045	0	823	189	1010	0	789
chr1.2323846.G.T	na	na	NoRepeat	0	1337	234	1083	249	1622	269	1404
chr3.31958257.C.A	na	na	NoRepeat	0	1227	0	811	0	1296	27	1001
chr10.49890375.G.C	na	na	NoRepeat	0	1074	0	628	205	1136	0	766
chr6.162397425.T.C	na	na	NoRepeat	0	758	110	559	121	755	0	243
chr18.66816940.T.G	na	na	NoRepeat	0	733	0	659	140	852	0	565
chr12.80159945.G.T	na	na	NoRepeat	3	1343	242	935	0	870	0	945
chr14.98802841.T.C	na	na	NoRepeat	0	738	0	616	0	1013	107	548
chr4.81067357.G.A	na	na	NoRepeat	0	1023	0	1269	0	1280	234	914
chr10.59690166.A.G	na	na	NoRepeat	0	1162	0	689	231	1252	0	742
chr3.30358606.C.G	na	na	NoRepeat	1	1583	621	1076	405	1095	721	1090
chr4.85330736.C.G	na	na	NoRepeat	0	600	0	810	140	754	0	727
chr14.84907980.T.A	na	na	chr14_84907774_84908037	0	1173	198	754	283	838	113	706
chr4.23686841.C.T	na	na	NoRepeat	0	1433	2	1406	0	1364	122	1187
chr5.21940497.G.C	na	na	NoRepeat	0	1203	232	1270	143	1233	296	804
chr13.39945967.G.A	na	na	NoRepeat	0	1315	0	975	1	609	156	804
chr3.7544914.A.T	na	na	NoRepeat	0	977	0	826	0	992	255	875
chr15.53503234.G.A	na	na	NoRepeat	0	1108	0	1218	0	1174	59	861
chr13.77936871.A.T	na	na	NoRepeat	0	961	0	775	0	1187	123	697
chr9.20251123.G.T	na	na	NoRepeat	0	1933	301	1383	266	1567	452	1263
chr6.19158848.C.G	na	na	NoRepeat	0	1262	199	1556	229	995	227	1798
chr2.218319996.G.A	na	na	NoRepeat	0	646	0	636	0	650	129	521
chr1.227985057.G.A	na	na	NoRepeat	0	355	0	291	0	419	55	343
chr9.11778696.G.A	na	na	NoRepeat	0	1178	234	795	207	1245	0	842
chr3.122309118.C.A	na	na	NoRepeat	0	199	41	154	70	256	91	182
chr2.45778726.G.T	na	na	NoRepeat	0	956	0	936	4	1417	162	840
chr3.70186400.A.T	na	na	NoRepeat	0	584	1	425	0	659	73	463
chr1.209612321.G.A	na	na	NoRepeat	6	1757	0	1383	1	2049	458	1390
chr3.42782895.T.A	na	na	NoRepeat	0	1416	0	1099	258	1532	0	1193
chr15.95998295.G.T	na	na	chr15_95997839_95998455	2	1235	0	1324	0	1543	297	948
chr3.17956256.G.A	na	na	NoRepeat	0	1549	0	1223	0	1619	176	1342
chr1.165308955.G.A	na	na	NoRepeat	0	1335	465	1192	356	1281	320	1031
chr13.91552037.T.A	na	na	NoRepeat	0	1318	0	1045	0	1433	189	923
chr16.23252179.G.A	na	na	NoRepeat	0	1790	1	1682	319	1707	0	2110
chr4.42731823.T.A	na	na	NoRepeat	0	962	0	942	0	926	127	827
chr3.114188621.C.T	na	na	chr3_114188238_114188927	1	1399	0	1007	175	1380	2	1140
chr2.55955487.C.T	na	na	NoRepeat	0	1258	0	1168	0	1417	140	1303
chr12.72821234.G.A	na	na	NoRepeat	0	2006	807	1366	610	1796	893	1492
chr1.192924220.A.T	na	na	chr1_192924114_192924213	0	1204	0	1090	0	1507	145	1018
chr13.101333055.G.T	na	na	NoRepeat	1	1178	163	891	1	956	0	820
chr10.83866735.G.T	na	na	NoRepeat	3	1570	560	1088	442	1268	548	918
chr1.245563445.C.A	na	na	NoRepeat	0	998	367	907	262	861	275	758
chr10.87712509.G.T	na	na	NoRepeat	0	1362	0	1231	215	1427	0	1003
chr18.64503814.T.G	na	na	NoRepeat	0	454	77	367	82	474	106	330
chr1.247966348.G.T	na	na	NoRepeat	0	1067	0	995	0	1314	188	731
chr14.49927339.C.A	na	na	NoRepeat	0	1001	3	808	0	1249	137	864
chr1.172357441.G.T	na	na	NoRepeat	0	402	72	374	64	316	71	264
chr1.219552208.G.C	na	na	chr1_219552191_219552332	0	1129	0	1036	1	1341	329	921
chr13.112200838.C.A	na	na	CpG_SOX1_521020	0	200	0	181	33	213	0	164
chrX.134140599.G.C	na	na	NoRepeat	0	705	0	740	0	957	101	560
chr3.67004552.C.A	na	na	NoRepeat	0	965	2	498	38	587	106	935
chr3.96841320.C.T	na	na	chr3_96841204_96841401	0	772	0	637	119	873	0	567
chr13.79730383.C.A	na	na	chr13_79730202_79730500	0	1072	0	906	201	992	0	750
chr14.59782456.C.A	na	na	NoRepeat	0	1162	135	810	0	1080	0	783
chr16.49047337.G.T	na	na	chr16_49047163_49047359	0	108	0	95	74	168	0	84
chr12.83644601.C.T	na	na	NoRepeat	0	2298	372	1520	260	1357	418	1315
chr3.74947226.C.A	na	na	NoRepeat	0	1435	0	1105	0	1389	341	1139
chr14.89124201.A.T	na	na	chr14_89124209_89124311	0	1277	0	1024	0	1654	117	788
chr3.7585504.T.A	na	na	chr3_7585391_7585580	0	1258	0	1015	0	1404	179	1308
chr7.122735968.G.A	na	na	chr7_122735946_122736098	0	858	4	944	4	1265	102	896
chr3.57516406.T.A	na	na	chr3_57516109_57516706	0	1168	0	920	204	1394	0	1109
chr14.88249402.T.G	na	na	NoRepeat	0	1727	356	1216	231	1397	416	1093
chr13.71057062.C.A	na	na	NoRepeat	0	1934	878	1590	612	1700	775	1296
chr18.64447840.G.A	na	na	chr18_64447776_64448299	0	988	0	805	158	977	0	817
chr2.210146394.C.G	na	na	NoRepeat	1	1408	0	1356	0	1630	128	835
chr12.72778206.A.G	na	na	NoRepeat	0	927	0	749	175	916	0	665
chr14.42538941.A.C	na	na	NoRepeat	0	1359	0	1108	0	1637	322	1126
chr3.118198683.C.T	na	na	chr3_118198551_118198845	0	1280	1	937	213	1280	0	983
chr3.71082645.A.G	na	na	chr3_71082518_71082722	0	677	0	618	0	892	297	699
chr13.58464851.T.C	na	na	NoRepeat	0	1609	523	1000	340	1073	504	870
chr12.96175468.C.T	na	na	NoRepeat	0	1462	501	940	374	994	466	813
chr4.97255620.C.G	na	na	NoRepeat	0	516	0	563	0	711	73	425
chr13.95466294.T.G	na	na	NoRepeat	0	1578	0	1348	0	1686	367	1041
chr3.7078204.T.C	na	na	NoRepeat	0	797	0	580	157	803	0	599
chr3.27475862.T.C	na	na	NoRepeat	0	739	0	550	92	897	0	652
chr3.64356376.C.G	na	na	chr3_64356364_64356558	0	1408	0	1045	0	1495	199	1304
chr13.80160591.C.A	na	na	NoRepeat	0	1329	0	1091	226	1294	0	1047
chr3.152933029.C.T	na	na	chr3_152933026_152933144	0	1235	0	946	0	1264	163	1021
chr13.35800918.A.G	na	na	NoRepeat	1	425	150	312	97	329	182	296
chr14.63292820.C.T	na	na	NoRepeat	0	1181	0	944	0	1508	127	820
chr3.63938740.G.A	na	na	NoRepeat	0	759	0	677	0	854	84	681
chr2.151265554.T.A	na	na	NoRepeat	0	1024	0	1138	0	1185	352	909
chr18.22134056.G.A	na	na	chr18_22133935_22134239	0	1078	254	1762	235	1233	406	2225
chr7.121894653.T.A	na	na	NoRepeat	0	819	440	695	158	640	171	642
chr13.87861936.G.T	na	na	NoRepeat	0	1065	175	720	97	683	230	644
chr18.71878388.A.T	na	na	NoRepeat	0	1252	0	974	225	1415	0	894
chr22.17302103.C.G	na	na	NoRepeat	0	837	117	499	72	606	147	568
chr3.14868243.T.C	na	na	NoRepeat	0	331	0	251	57	310	0	271
chr13.109440103.G.T	na	na	chr13_109440042_109440197	1	1360	178	1036	0	944	4	939
chrX.40694740.G.A	na	na	chrX_40694611_40694826	0	125	0	98	0	116	38	73
chr3.1496303.T.C	na	na	NoRepeat	0	1548	0	1127	1	1403	104	1109
chr2.241323714.T.C	na	na	NoRepeat	0	215	0	196	0	205	17	134
chr2.20725189.G.A	na	na	NoRepeat	0	1221	1	1087	0	1498	114	980
chr8.29756869.C.A	na	na	NoRepeat	0	1264	287	1097	206	840	314	669
chr2.205551108.A.T	na	na	V$TAL1ALPHAE47_01	0	838	0	944	0	1191	132	628
chr18.67184683.A.G	na	na	NoRepeat	0	1433	260	994	187	1184	154	764
chr3.52488263.T.A	na	na	NoRepeat	0	1171	0	814	0	1346	144	1104
chr6.150872126.C.T	na	na	NoRepeat	0	918	166	579	0	778	0	790
chr5.15124411.G.A	na	na	NoRepeat	0	1005	0	1827	0	1762	138	773
chr13.95228081.T.C	na	na	NoRepeat	0	1126	0	932	3	1112	189	783
chr6.135860694.G.C	na	na	NoRepeat	0	1098	0	898	219	1156	0	1092
chr3.77087910.C.T	na	na	NoRepeat	0	842	262	865	101	790	598	1211
chr8.37561680.C.T	na	na	NoRepeat	0	1506	179	1160	0	1433	0	717
chr22.25398124.G.C	na	na	NoRepeat	0	2032	238	1591	0	1551	0	1680
chr18.65306530.C.A	na	na	NoRepeat	0	1745	368	1304	221	1377	227	1084
chr6.115259317.A.G	na	na	NoRepeat	0	1701	258	1061	246	1185	2	715
chr13.44959074.C.G	na	na	chr13_44958994_44959101	0	1794	0	1372	0	1841	252	1308
chr15.47348832.T.A	na	na	NoRepeat	0	473	72	420	0	171	0	277
chr5.27771424.C.G	na	na	NoRepeat	0	1983	409	2452	279	2362	484	1496
chr9.13320452.T.C	na	na	NoRepeat	1	1485	186	1066	0	1188	0	965
chr1.2445647.C.T	na	na	CpG_PANK4_0	0	298	84	257	43	305	166	327
chr13.96837452.A.T	na	na	NoRepeat	0	1471	0	1291	304	1690	0	1141
chr18.49756470.G.A	na	na	NoRepeat	1	1817	648	1264	508	1393	627	1065
chr4.132292129.T.A	na	na	chr4_132292077_132292224	0	902	0	750	0	1162	135	838
chr8.114979687.T.C	na	na	NoRepeat	0	75	0	92	0	66	18	96
chr10.110259587.C.A	na	na	NoRepeat	0	1375	212	998	0	1098	0	885
chr13.93559596.G.T	na	na	NoRepeat	2	495	0	464	98	567	2	355
chr2.218753837.C.T	na	na	NoRepeat	1	868	0	795	0	914	74	685
chr12.42180052.T.G	na	na	NoRepeat	0	1707	329	1347	202	1442	421	1577
chr4.30975305.C.A	na	na	NoRepeat	1	776	0	940	164	1019	0	788
chr3.31474432.G.T	na	na	NoRepeat	0	657	267	435	189	440	383	546
chr2.216634094.G.T	na	na	NoRepeat	0	370	0	355	0	445	35	244
chr5.29851600.T.A	na	na	NoRepeat	0	866	0	930	98	965	0	433
chr2.192420497.G.A	na	na	NoRepeat	0	1280	0	1418	0	1642	146	992
chr3.61914276.G.C	na	na	chr3_61914114_61914276	0	1368	0	1138	185	1411	0	1207
chr5.19229061.G.A	na	na	NoRepeat	0	1208	224	1364	182	1435	217	772
chr17.6048394.C.T	na	na	NoRepeat	0	2368	979	1789	706	1763	982	1584
chr13.64466927.C.T	na	na	NoRepeat	0	873	0	683	2	539	99	533
chr5.19228992.G.A	na	na	NoRepeat	1	1096	196	1284	132	1231	204	692
chr8.35656574.C.T	na	na	NoRepeat	0	1494	273	1022	0	944	0	755
chr3.21405696.T.C	na	na	NoRepeat	0	1162	0	814	1	1159	154	1048
chr18.29954276.A.G	na	na	NoRepeat	0	871	0	777	172	985	0	642
chr10.107659809.A.G	na	na	NoRepeat	0	1189	0	785	210	1207	0	806
chr7.89020391.A.T	na	na	NoRepeat	0	340	0	670	0	525	140	443
chr3.55853903.T.A	na	na	chr3_55853826_55854107	1	1037	0	846	159	926	0	902
chr17.8217535.G.T	na	na	NoRepeat	0	1494	0	1495	334	1657	0	1818
chr9.42151239.T.A	na	na	NoRepeat	0	121	0	86	19	168	0	135
chr18.31712474.C.T	na	na	NoRepeat	0	1142	0	954	173	1331	0	794
chr3.3461295.C.A	na	na	NoRepeat	0	1062	156	766	0	1051	0	933
chr17.31708122.G.T	na	na	chr17_31708055_31708190	0	1484	2	1304	297	1143	0	1365
chr5.135486273.A.T	na	na	NoRepeat	0	285	0	290	79	429	0	314
chr18.45103044.G.T	na	na	NoRepeat	0	1054	151	752	0	885	0	656
chr9.20251421.G.A	na	na	NoRepeat	0	408	25	208	25	147	35	155
chr5.3476445.G.T	na	na	NoRepeat	0	1481	0	1332	197	1611	0	565
chr13.81278863.G.A	na	na	NoRepeat	0	328	40	206	0	311	1	215
chr10.108751301.C.T	na	na	chr10_108751169_108751336	1	1224	0	886	150	1117	0	748
chr3.142243657.C.A	na	na	NoRepeat	1	1057	0	807	182	1099	0	850
chr12.85292557.A.T	na	na	NoRepeat	0	1551	2	1073	267	1529	0	1103
chr2.224183728.G.T	na	na	NoRepeat	0	1444	226	1306	16	1200	1	1841
chrX.23079255.T.G	na	na	chrX_23079257_23079415	0	1307	315	971	388	1248	796	1356
chr3.61623200.A.G	na	na	NoRepeat	0	1468	269	1033	251	1183	346	1070
chr2.231972379.G.A	na	na	NoRepeat	0	891	0	884	0	1100	104	920
chr2.60213673.C.A	na	na	NoRepeat	0	1168	0	1276	0	1642	197	1392
chr18.49702039.T.C	na	na	chr18_49701912_49702394	0	1249	234	948	149	915	178	743
chr2.232103670.G.A	na	na	NoRepeat	2	762	0	736	0	746	76	650
chr17.80461070.A.T	na	na	NoRepeat	0	1064	0	981	217	1328	0	1384
chr12.80427566.G.A	na	na	chr12_80427341_80427585	1	1089	0	817	213	1141	0	827
chr13.88193880.G.T	na	na	NoRepeat	0	1269	508	852	273	742	442	714
chr14.29830579.T.C	na	na	NoRepeat	0	955	0	698	0	1150	249	785
chr13.107394075.A.G	na	na	chr13_107393991_107394093	0	1280	0	1010	1	1153	154	743
chr1.182652199.A.G	na	na	NoRepeat	1	1242	0	1091	0	1449	166	990
chr13.63753376.T.G	na	na	NoRepeat	0	451	0	390	72	516	0	355
chr2.202002191.G.A	na	na	chr2_202002049_202002261	0	262	0	227	0	284	9	172
chr2.56425972.A.T	na	na	NoRepeat	0	1021	0	808	0	1009	117	886
chr13.105504423.G.C	na	na	NoRepeat	0	1299	0	1001	0	1307	154	730
chr15.53502528.G.A	na	na	NoRepeat	0	1064	0	1030	0	1311	84	876
chr4.161605653.C.A	na	na	NoRepeat	0	242	0	357	0	267	38	250
chr7.89443705.G.C	na	na	NoRepeat	0	1070	0	1812	0	1599	289	1247
chr10.8057106.G.A	na	na	NoRepeat	0	1090	0	762	199	1198	0	579
chr16.6456761.T.C	na	na	NoRepeat	0	1114	248	963	5	478	0	812
chr13.65331695.C.A	na	na	NoRepeat	0	881	0	684	146	922	0	585
chr22.44524356.G.T	na	na	NoRepeat	0	891	170	699	0	498	0	733
chr8.66240098.C.G	na	na	chr8_66239874_66240137	0	886	0	1020	0	1293	84	805
chr2.142125516.A.G	na	na	NoRepeat	0	1056	205	902	220	988	254	742
chr13.68562082.G.C	na	na	NoRepeat	0	1153	0	892	210	1088	0	781
chr7.102775764.A.G	na	na	NoRepeat	0	1281	0	1473	0	2036	175	1522
chr3.110242087.T.G	na	na	NoRepeat	1	575	0	605	107	679	0	586
chr2.157990873.G.C	na	na	NoRepeat	1	734	0	706	0	829	91	467
chr9.40713983.T.G	na	na	NoRepeat	1	1647	204	1520	141	1857	199	1406
chr6.7676843.A.G	na	na	NoRepeat	1	572	1	469	0	609	58	426
chr8.6209066.A.G	na	na	NoRepeat	0	1413	509	990	537	1338	640	987
chr13.60109191.C.G	na	na	NoRepeat	0	1174	0	952	221	1289	0	899
chr8.24250182.A.G	na	na	NoRepeat	0	1477	314	1189	0	1112	0	689
chr13.58464855.A.T	na	na	NoRepeat	0	1571	522	989	338	1064	496	870
chr6.141703564.A.G	na	na	NoRepeat	0	591	0	443	0	622	37	505
chr4.31029821.T.G	na	na	NoRepeat	0	634	0	696	0	763	48	600
chr3.35797957.C.G	na	na	NoRepeat	0	1564	0	1251	2	1559	383	1257
chr13.66683122.T.A	na	na	chr13_66683056_66683169	0	971	0	730	224	1146	0	675
chr1.184085853.A.T	na	na	NoRepeat	0	1162	0	1014	0	1253	71	800
chr13.25311774.G.T	na	na	NoRepeat	0	686	175	348	188	525	277	459
chr2.240664417.T.A	na	na	NoRepeat	0	665	1	598	0	580	90	530
chr7.61737458.A.G	na	na	NoRepeat	0	1570	0	1727	69	2200	0	1643
chr6.67181607.T.A	na	na	chr6_67181387_67181597	0	1032	0	565	0	945	122	801
chr13.42015177.G.T	na	na	NoRepeat	0	42	0	31	0	57	6	33
chr16.34628527.G.T	na	na	NoRepeat	0	1104	1	1232	1	1317	173	1572
chr2.80564640.G.C	na	na	NoRepeat	0	536	115	390	59	293	33	347
chr4.153152832.G.A	na	na	chr4_153152701_153153567	0	646	0	653	0	786	41	716
chr6.133509779.T.A	na	na	NoRepeat	0	811	0	672	170	866	0	693
chr22.17154112.G.T	na	na	NoRepeat	0	750	0	530	104	735	0	680
chr13.74000745.C.A	na	na	NoRepeat	0	1762	297	1226	201	1268	433	1101
chr10.64619506.G.T	na	na	NoRepeat	2	1224	0	837	219	1277	1	707
chr10.79302643.A.G	na	na	NoRepeat	0	937	0	739	171	1014	2	746
chr2.238168570.A.G	na	na	NoRepeat	0	985	0	1287	186	1278	0	863
chr3.20911923.C.T	na	na	NoRepeat	1	948	0	748	14	991	282	790
chr21.25558869.T.A	na	na	NoRepeat	0	353	0	397	28	260	0	279
chr18.54917424.A.G	na	na	chr18_54917259_54917643	0	705	0	502	105	668	0	511
chr14.44321966.A.C	na	na	NoRepeat	0	1348	497	1017	571	1298	644	1010
chr8.40273381.C.T	na	na	NoRepeat	0	1285	0	1305	218	1318	0	1478
chr2.107981143.C.T	na	na	NoRepeat	0	1126	0	1188	0	1298	131	1009
chr10.31875756.G.T	na	na	NoRepeat	0	957	1	635	196	1035	0	633
chr13.48442837.A.G	na	na	NoRepeat	0	1227	210	793	216	1203	0	800
chr2.133305164.G.A	na	na	chr2_133305109_133305235	1	764	0	655	0	922	59	570
chr6.133703416.G.A	na	na	NoRepeat	1	1546	0	1070	299	1535	0	1206
chr3.35581956.C.T	na	na	chr3_35581754_35582206	0	1180	0	866	215	1235	0	962
chr18.71878083.G.A	na	na	NoRepeat	0	845	0	626	130	847	0	644
chr3.23739053.C.A	na	na	NoRepeat	0	748	324	583	305	755	461	652
chr2.239445952.G.A	na	na	NoRepeat	0	769	0	808	147	958	0	631
chr17.50762065.C.A	na	na	NoRepeat	0	116	0	89	15	77	0	104
chrX.10899718.G.T	na	na	NoRepeat	0	1388	247	1009	153	1188	0	616
chr3.138134660.T.C	na	na	NoRepeat	0	1173	185	874	0	1034	0	926
chr3.35556740.C.A	na	na	NoRepeat	0	731	0	628	95	752	0	705
chr2.123517235.T.C	na	na	NoRepeat	2	1151	343	984	212	839	463	819
chr2.104661247.C.G	na	na	NoRepeat	0	1396	0	1751	0	2049	174	1389
chr2.132575671.G.A	na	na	NoRepeat	0	349	0	349	66	429	0	283
chr6.116221000.T.A	na	na	NoRepeat	0	1116	0	946	262	1387	0	641
chr15.98673385.G.C	na	na	NoRepeat	0	1065	0	1146	0	1227	53	904
chr1.241335895.G.T	na	na	NoRepeat	0	1379	2	1215	0	1743	386	1181
chr10.127837124.A.T	na	na	NoRepeat	0	1476	221	1007	0	1054	0	805
chr3.7425206.T.C	na	na	NoRepeat	0	1227	0	955	0	1236	333	1054
chr3.77009496.C.G	na	na	NoRepeat	1	1527	247	1109	2	1305	0	1318
chr15.85736148.C.T	na	na	NoRepeat	0	1365	2	1768	0	1918	192	1327
chr2.200550395.T.A	na	na	NoRepeat	0	1238	0	1298	351	1875	0	975
chr13.64147824.T.C	na	na	NoRepeat	0	551	0	433	135	623	0	435
chr13.81432348.G.C	na	na	chr13_81432239_81432669	0	1322	167	1109	0	1482	0	940
chr3.35644712.T.G	na	na	chr3_35644691_35644855	0	981	0	834	0	983	262	852
chr6.15300107.C.T	na	na	NoRepeat	0	695	130	616	0	212	122	414
chr13.39060411.G.T	na	na	NoRepeat	0	1541	715	1234	616	1637	652	1072
chr6.72658572.C.A	na	na	NoRepeat	0	1374	0	792	0	1095	180	1089
chr7.113145234.A.G	na	na	NoRepeat	0	1508	1	1312	0	1759	326	1437
chr3.62756002.A.T	na	na	NoRepeat	0	888	0	791	136	878	1	885
chr13.19955832.A.T	na	na	chr13_19955741_19955842	0	1283	0	1047	0	1404	231	1142
chr13.97917884.A.G	na	na	NoRepeat	0	668	0	613	0	635	251	555
chr2.234084689.G.A	na	na	NoRepeat	0	521	0	469	0	576	47	400
chr14.87659617.T.C	na	na	NoRepeat	0	845	167	584	217	690	86	512
chr13.63275210.C.A	na	na	NoRepeat	0	839	0	632	0	970	67	583
chr13.71208859.C.A	na	na	chr13_71208691_71209209	0	1131	1	971	0	1298	97	691
chr4.29955175.G.T	na	na	NoRepeat	0	1143	0	1208	0	1360	87	795
chr3.67228787.G.T	na	na	NoRepeat	0	1549	638	1219	562	1520	896	1360
chr2.235983386.C.T	na	na	NoRepeat	0	838	0	968	0	939	113	744
chr8.42163341.G.A	na	na	NoRepeat	0	756	0	723	152	850	0	900
chr13.59716047.C.T	na	na	chr13_59715930_59716077	0	1475	726	1260	399	1134	612	1043
chr18.57780937.C.T	na	na	NoRepeat	0	1772	305	1324	0	1624	0	1338
chr18.50254801.C.A	na	na	chr18_50254805_50255419	0	1450	314	1168	243	1168	372	949
chr8.39861872.G.A	na	na	NoRepeat	0	1353	0	1530	231	1477	0	1402
chr13.19614854.G.C	na	na	NoRepeat	0	633	0	604	116	674	0	512
chr13.73773105.G.A	na	na	NoRepeat	0	1429	0	1157	255	1330	0	1160
chr6.167663219.G.A	na	na	NoRepeat	0	67	0	62	9	46	0	16
chr8.9608961.T.G	na	na	NoRepeat	0	1142	237	896	0	941	0	883
chr8.15341770.A.T	na	na	NoRepeat	0	1748	280	1309	0	1375	0	1165
chr22.44222138.T.C	na	na	NoRepeat	0	1079	178	683	158	804	0	917
chr13.55991658.T.C	na	na	NoRepeat	0	1134	0	965	212	1273	0	856
chr2.167386853.T.A	na	na	NoRepeat	0	1450	0	1254	1	1663	148	1064
chr2.83390542.C.T	na	na	chr2_83390309_83390533	0	974	0	711	177	1013	0	952
chr8.11327053.C.T	na	na	NoRepeat	0	503	0	410	65	483	0	458
chr3.77087914.C.T	na	na	NoRepeat	0	790	251	821	97	740	545	1138
chr6.126861372.C.G	na	na	chr6_126861354_126861457	0	320	0	276	89	371	0	149
chr7.125074717.T.C	na	na	NoRepeat	0	1478	0	1418	2	2129	370	1495
chr5.2842410.T.C	na	na	NoRepeat	1	1468	237	1161	200	1183	0	582
chr2.233865692.C.A	na	na	NoRepeat	1	1113	238	1109	11	1181	0	1006
chr3.98812296.C.G	na	na	NoRepeat	0	642	68	406	0	619	0	393
chr3.2863207.G.T	na	na	NoRepeat	0	783	0	562	173	841	0	685
chr14.85953787.C.A	na	na	NoRepeat	0	1129	0	869	0	1241	262	721
chr8.207990.T.A	na	na	NoRepeat	1	1026	176	716	100	680	284	831
chr10.45735909.A.T	na	na	NoRepeat	0	1049	0	754	223	1199	0	651
chr10.104796374.G.A	na	na	NoRepeat	0	1238	0	1133	226	1462	0	984
chr6.114761936.T.C	na	na	NoRepeat	0	1439	436	886	367	1012	221	488
chr18.50240375.C.G	na	na	NoRepeat	0	1352	0	1004	257	1381	0	927
chr13.103868429.C.A	na	na	NoRepeat	2	1532	0	1424	249	1485	0	1083
chr10.83866736.A.T	na	na	NoRepeat	0	1552	565	1086	433	1243	539	906
chr4.13381868.C.T	na	na	NoRepeat	0	1593	1	1522	0	1398	143	1183
chrX.125796410.C.A	na	na	NoRepeat	0	67	0	99	16	121	0	66
chr7.113052277.C.G	na	na	NoRepeat	0	1789	359	1788	316	2248	506	1863
chr5.73650725.C.T	na	na	NoRepeat	0	128	0	131	0	178	44	127
chr2.105290466.C.T	na	na	NoRepeat	0	1522	0	1781	0	1864	172	1357
chr8.36365016.T.C	na	na	NoRepeat	0	1483	617	1187	522	1141	427	861
chr12.69894121.T.C	na	na	NoRepeat	0	1919	353	1319	272	1560	0	1250
chr2.115408653.T.G	na	na	NoRepeat	0	1441	0	1638	0	1776	142	1215
chr15.34506295.T.C	na	na	NoRepeat	0	936	0	1008	0	1295	278	901
chr6.108495657.C.T	na	na	CpG_NR2E1_0	0	1180	0	900	178	1170	0	1140
chrX.86527701.T.A	na	na	NoRepeat	0	639	0	565	123	628	0	441
chr3.116042404.T.A	na	na	NoRepeat	1	1313	213	895	1	520	0	1149
chr3.141495754.G.A	na	na	V$MEF2_01	0	920	1	869	0	1149	154	880
chr3.50425385.A.G	na	na	V$NRSF_01	1	843	0	613	1	887	112	806
chr4.91782562.T.G	na	na	NoRepeat	0	359	0	343	55	500	0	299
chr13.47691844.C.A	na	na	V$MEF2_04	0	1182	0	1011	0	1345	352	878
chr3.107760495.C.A	na	na	NoRepeat	0	1054	0	785	130	977	0	724
chr14.47799763.T.G	na	na	NoRepeat	0	1451	269	1103	364	1290	364	1143
chr9.133708246.G.C	na	na	NoRepeat	0	1754	653	1268	293	1916	431	1064
chr6.99036195.G.T	na	na	NoRepeat	0	950	3	538	0	812	201	711
chr4.33440258.T.G	na	na	NoRepeat	0	1414	0	1477	0	1658	190	1335
chr12.39418917.T.C	na	na	NoRepeat	0	716	126	521	0	575	0	668
chr1.165729090.C.G	na	na	NoRepeat	0	790	0	676	0	1076	97	688
chr13.81105832.C.A	na	na	NoRepeat	1	934	0	745	0	1122	148	672
chr13.65056271.T.A	na	na	chr13_65056156_65056331	0	1445	188	1147	0	1425	0	953
chr3.3331622.A.C	na	na	NoRepeat	0	199	0	169	0	206	18	196
chr10.117546798.T.A	na	na	NoRepeat	0	965	0	817	178	1127	0	724
chr13.94483874.C.T	na	na	NoRepeat	0	1166	306	1091	218	1159	0	1005
chr5.49582734.G.C	na	na	NoRepeat	0	1494	223	1248	147	1029	603	1578
chr6.123316409.A.G	na	na	NoRepeat	0	970	1	695	231	893	0	423
chr3.117416897.C.T	na	na	NoRepeat	1	1683	334	1420	241	1302	263	1118
chr13.110551288.C.T	na	na	NoRepeat	0	1103	0	1069	0	1160	174	788
chr13.35538235.C.A	na	na	NoRepeat	0	525	0	445	5	651	95	476
chr1.195684009.G.T	na	na	NoRepeat	0	1437	4	1243	2	1756	204	1150
chr6.162425067.C.G	na	na	NoRepeat	0	1587	307	1249	455	1651	0	387
chr10.87712510.G.T	na	na	NoRepeat	2	1367	0	1237	211	1433	0	1002
chr2.215128222.C.T	na	na	chr2_215128199_215128465	0	1446	0	1439	0	1781	202	991
chr13.83523886.C.T	na	na	NoRepeat	0	2176	773	1461	645	1851	677	1175
chr4.100711949.A.T	na	na	chr4_100711940_100712314	0	563	0	575	0	823	147	609
chr7.86737294.C.G	na	na	NoRepeat	0	1184	0	2028	0	1758	161	1398
chr17.31451170.T.C	na	na	NoRepeat	0	1544	1	1418	288	1724	0	1599
chr3.59935646.A.G	na	na	chr3_59935260_59935672	0	1591	0	1161	4	1632	409	1346
chr13.57530358.C.A	na	na	NoRepeat	0	1135	1	823	187	1387	0	770
chr13.106894940.A.T	na	na	chr13_106894862_106895019	0	1332	0	1106	0	1450	217	989
chr11.2887266.C.G	na	na	NoRepeat	0	631	103	488	271	721	169	497
chr11.49691898.G.A	na	na	NoRepeat	0	579	94	568	0	35	1	385
chr10.32393402.G.C	na	na	NoRepeat	0	958	0	560	164	903	0	723
chr1.195778309.C.G	na	na	NoRepeat	0	1218	1	1130	0	1657	149	1042
chr18.30275327.A.T	na	na	NoRepeat	0	1333	1	1161	305	1364	0	973
chr5.32589060.G.T	na	na	NoRepeat	0	1157	0	1145	231	1547	0	697
chr14.66887057.A.G	na	na	chr14_66887052_66887467	0	1286	0	916	0	1552	336	844
chr7.114170612.A.T	na	na	chr7_114170136_114170694	0	811	16	789	264	1073	297	788
chr1.236567708.G.T	na	na	chr1_236567451_236567701	0	1325	4	1253	2	1525	141	1145
chr3.22566429.A.G	na	na	NoRepeat	0	773	0	629	0	763	106	635
chr7.86312984.A.T	na	na	NoRepeat	0	1056	671	1629	156	976	277	1076
chr18.69556022.A.T	na	na	NoRepeat	0	1278	0	1136	254	1462	0	935
chr13.68704903.T.G	na	na	NoRepeat	0	1295	0	1144	168	1387	0	911
chr18.67141811.C.A	na	na	NoRepeat	0	1656	292	1124	0	1517	0	1056
chr3.18532581.T.A	na	na	NoRepeat	0	1186	0	763	169	1088	1	890
chr6.68825962.T.A	na	na	NoRepeat	0	1585	184	770	0	949	0	1073
chr18.27817795.T.A	na	na	NoRepeat	0	527	0	417	65	513	0	337
chr2.235000610.C.A	na	na	NoRepeat	0	503	0	468	0	541	109	530
chr12.72261024.G.C	na	na	NoRepeat	0	1875	611	1190	499	1365	706	1148
chr3.104902914.T.A	na	na	NoRepeat	0	980	222	687	159	724	0	788
chr3.151536641.G.A	na	na	NoRepeat	0	1300	0	1069	301	1415	0	1217
chr13.64607097.T.A	na	na	chr13_64607079_64607427	0	1451	0	1113	213	1527	1	1081
chr15.27786930.C.T	na	na	CpG_GABRB3_767784	0	328	96	243	69	341	128	193
chr13.55763907.C.A	na	na	NoRepeat	0	546	0	434	112	578	0	391
chr13.103659964.T.C	na	na	NoRepeat	0	2041	485	1590	246	1507	535	1363
chr15.48028778.G.A	na	na	NoRepeat	1	1727	0	1744	246	1749	0	1434
chr2.64455500.A.T	na	na	V$OCT1_02	0	431	0	425	0	498	68	467
chr1.236869887.A.G	na	na	NoRepeat	0	891	0	862	0	1265	114	722
chr6.14696048.C.T	na	na	chr6_14696019_14696170	0	652	0	583	0	764	77	499
chr10.107295437.T.A	na	na	chr10_107295136_107295468	0	951	0	826	194	1050	0	667
chr5.21941466.G.A	na	na	NoRepeat	0	1153	212	1472	204	1423	296	861
chr14.30365843.A.T	na	na	NoRepeat	0	1307	278	1098	0	1421	0	1220
chr15.41799325.G.A	na	na	chr15_41799248_41799507	0	1110	259	1132	189	1011	294	909
chr13.72425821.C.T	na	na	NoRepeat	0	1548	0	1264	0	1592	324	1014
chr4.28908881.C.A	na	na	NoRepeat	0	1340	0	1297	0	1457	220	1180
chr14.79743199.A.G	na	na	NoRepeat	1	1730	302	1193	399	1366	203	1065
chr3.68286010.G.A	na	na	NoRepeat	0	1181	199	882	0	982	0	1054
chr14.85253474.T.A	na	na	NoRepeat	0	800	0	705	0	1040	178	478
chr3.14868242.C.A	na	na	NoRepeat	0	347	0	257	55	323	0	278
chr2.115408652.C.G	na	na	NoRepeat	0	1460	0	1660	0	1805	143	1225
chr14.56653894.G.A	na	na	NoRepeat	0	1116	0	785	0	1283	147	949
chr12.69707433.G.T	na	na	NoRepeat	0	819	97	580	0	596	0	605
chr2.155580098.A.C	na	na	NoRepeat	0	867	0	970	0	1231	201	704
chr4.19074806.T.A	na	na	chr4_19074783_19075065	0	1199	0	1198	0	1113	133	1111
chr6.47261031.T.A	na	na	chr6_47260870_47261022	0	974	0	3658	189	2901	0	4700
chr2.230634082.C.A	na	na	chr2_230633913_230634100	0	957	194	949	133	755	233	952
chr3.18794319.G.A	na	na	NoRepeat	0	1194	16	593	248	1294	11	594
chr1.196003467.T.C	na	na	NoRepeat	0	1165	1	1089	0	1516	273	886
chr10.110507746.C.A	na	na	NoRepeat	1	1220	0	903	264	1255	0	859
chrX.81950997.C.G	na	na	NoRepeat	0	369	62	313	7	55	51	185
chr7.122644811.T.C	na	na	NoRepeat	0	1434	0	1566	1	1903	357	1670
chr18.65249783.C.T	na	na	NoRepeat	0	752	2	634	75	817	2	501
chr6.146965614.T.C	na	na	NoRepeat	0	1363	287	918	176	1236	0	948
chr4.21221185.C.A	na	na	NoRepeat	0	1573	0	1614	355	1690	0	1513
chr10.128426.C.T	na	na	NoRepeat	0	811	0	555	0	804	82	441
chr14.29066415.G.T	na	na	NoRepeat	0	948	2	740	0	1065	67	646
chr3.70476969.G.T	na	na	NoRepeat	0	1413	279	1098	237	1400	447	1265
chr17.38496105.C.A	na	na	NoRepeat	0	917	368	842	276	811	469	924
chr14.98266807.G.T	na	na	NoRepeat	3	1172	125	893	0	1240	0	794
chr18.31162457.G.T	na	na	chr18_31161963_31162447	0	1374	0	1005	182	1304	0	813
chr14.49087836.G.T	na	na	NoRepeat	0	869	99	578	0	814	0	620
chr2.214719889.A.G	na	na	NoRepeat	0	1475	502	1298	475	1393	615	1011
chr13.58898366.T.A	na	na	NoRepeat	0	1349	337	1139	262	1346	184	912
chr12.93503652.C.T	na	na	V$GR_Q6	0	1138	0	892	193	1078	0	884
chr9.16045763.A.G	na	na	NoRepeat	0	1506	301	1006	162	892	159	837
chr6.127441871.G.A	na	na	chr6_127441704_127441893	0	938	0	681	215	1013	0	459
chr4.127812412.C.A	na	na	NoRepeat	0	955	0	865	0	1145	205	806
chr4.14303334.A.T	na	na	NoRepeat	0	1362	0	1195	0	1385	111	1080
chr3.136984464.C.A	na	na	NoRepeat	0	935	0	613	188	848	1	1054
chrX.44546871.C.A	na	na	NoRepeat	0	915	0	1272	0	1712	128	1132
chr6.15300360.C.T	na	na	NoRepeat	0	2613	491	2517	1	2470	726	1991
chr10.69511034.C.T	na	na	NoRepeat	0	1260	309	664	303	916	486	744
chr10.110507641.A.T	na	na	NoRepeat	0	719	0	518	0	742	86	464
chr4.6034799.G.A	na	na	NoRepeat	0	1012	0	888	0	977	94	810
chr6.7805689.T.G	na	na	NoRepeat	0	1182	0	1212	0	1362	333	938
chr18.61750192.T.C	na	na	NoRepeat	0	1076	163	673	102	616	134	645
chr9.85539313.A.G	na	na	NoRepeat	0	1282	0	1333	206	1449	0	1725
chr10.62825002.A.T	na	na	NoRepeat	0	183	0	132	0	244	11	110
chr22.32941533.A.G	na	na	NoRepeat	0	152	0	112	43	189	0	161
chr3.109988643.G.A	na	na	NoRepeat	0	1371	0	1032	0	1469	325	1173
chr18.50936537.A.G	na	na	chr18_50936485_50936584	1	1118	207	733	161	787	247	588
chr13.106386640.A.C	na	na	NoRepeat	0	956	0	738	0	921	128	644
chr6.99036101.G.C	na	na	NoRepeat	2	723	0	424	0	617	148	527
chr4.181501644.G.T	na	na	V$POU3F2_02	0	1370	1	1228	2	1624	197	1043
chr19.31401834.A.T	na	na	V$GFI1_01	0	1094	0	1109	159	1142	0	1000
chr2.221746106.A.C	na	na	chr2_221745966_221746216	0	1039	0	940	0	1096	132	974
chr1.211268683.A.G	na	na	NoRepeat	0	1358	0	1266	1	1567	430	1283
chr12.68266468.T.A	na	na	NoRepeat	0	1402	201	1065	0	1230	0	1038
chr2.240725826.G.A	na	na	NoRepeat	0	786	0	762	6	758	186	622
chr3.114337984.C.A	na	na	NoRepeat	0	1416	12	497	9	637	19	375
chr7.113490673.T.C	na	na	NoRepeat	0	1122	0	1107	0	1767	203	1244
chr7.114002105.T.G	na	na	NoRepeat	0	1047	0	1117	181	1540	184	1135
chr5.648829.C.A	na	na	NoRepeat	0	57	11	57	0	95	0	28
chr13.85922706.G.A	na	na	NoRepeat	0	1968	0	1391	243	1352	0	1101
chr2.142105559.C.G	na	na	NoRepeat	0	1434	0	1392	0	1821	326	993
chr10.82863346.T.G	na	na	NoRepeat	0	1000	0	767	163	954	0	678
chr17.451594.C.G	na	na	NoRepeat	0	2224	324	1556	0	1689	1	1482
chr3.31983110.G.T	na	na	NoRepeat	0	736	0	567	161	742	0	659
chr6.63140138.C.A	na	na	NoRepeat	0	1450	40	1511	222	1533	0	2139
chr10.134498196.C.G	na	na	NoRepeat	0	759	0	565	130	687	0	550
chr16.20117718.G.T	na	na	chr16_20117691_20117884	0	1572	0	1544	295	1639	2	2240
chr7.114971680.C.T	na	na	NoRepeat	0	757	17	906	319	1119	400	763
chr2.220664811.C.A	na	na	NoRepeat	1	747	163	759	111	479	0	621
chr22.17558647.G.T	na	na	NoRepeat	1	929	0	752	122	943	2	789
chr1.237883593.G.T	na	na	NoRepeat	1	1425	229	1164	224	1291	325	1032
chr7.144583480.T.C	na	na	NoRepeat	0	1110	0	1012	0	1647	259	1141
chr10.77875901.G.T	na	na	NoRepeat	0	850	0	627	128	894	1	706
chr13.97103610.A.T	na	na	NoRepeat	0	1150	0	984	226	1218	0	905
chr2.82931435.C.G	na	na	NoRepeat	1	1358	201	1038	2	1101	0	1050
chr14.37780770.A.C	na	na	NoRepeat	0	898	0	875	0	1262	285	840
chr3.76645539.G.A	na	na	NoRepeat	0	879	0	687	154	854	0	799
chr22.48286550.G.A	na	na	NoRepeat	0	993	0	722	203	963	0	605
chr6.99038430.G.C	na	na	V$POU6F1_01	0	1057	0	615	0	858	267	797
chr8.29045753.C.G	na	na	NoRepeat	1	1603	566	1027	307	1164	414	804
chr6.6220232.A.T	na	na	chr6_6220089_6220283	0	705	0	701	0	750	106	577
chr2.83605980.C.T	na	na	NoRepeat	0	497	81	444	116	578	50	540
chr3.6698331.T.C	na	na	NoRepeat	0	1111	0	780	0	1169	148	957
chr4.23719148.C.G	na	na	NoRepeat	0	848	0	854	0	920	91	715
chr8.11428399.C.T	na	na	NoRepeat	0	674	118	536	0	565	0	581
chr4.31709025.T.G	na	na	NoRepeat	0	1539	254	1378	185	965	316	1122
chr3.139514715.T.A	na	na	V$STAT5A_02	0	1174	0	1017	201	1267	0	1034
chr1.221866473.C.A	na	na	NoRepeat	0	1143	301	878	298	1000	241	797
chr3.163176317.G.T	na	na	NoRepeat	0	1167	0	891	194	1161	0	1062
chr16.60280130.G.T	na	na	V$TAL1BETAITF2_01	0	1042	133	720	1	910	1	670
chr18.41807714.A.C	na	na	NoRepeat	0	1093	0	819	211	1208	0	763
chr10.110561549.C.G	na	na	NoRepeat	0	1470	297	1098	0	1141	0	882
chr1.190865487.T.A	na	na	NoRepeat	0	1340	193	1073	198	1252	336	968
chr18.31249767.T.A	na	na	chr18_31249628_31250533	0	1740	0	1243	277	1846	0	1145
chr7.121415449.G.T	na	na	NoRepeat	0	971	0	966	0	1373	223	1011
chr3.41695506.A.T	na	na	NoRepeat	0	1429	1	1103	0	1520	408	1249
chr1.231853532.C.T	na	na	NoRepeat	0	1173	0	1205	0	1427	315	1000
chr1.48012450.G.T	na	na	chr1_48012186_48012888	0	1936	231	1582	4	1937	2	1566
chr1.236567707.A.G	na	na	chr1_236567451_236567701	1	1310	0	1242	0	1492	145	1146
chr3.147085002.C.T	na	na	NoRepeat	0	1876	337	1459	0	1324	0	1459
chr2.176487446.G.T	na	na	NoRepeat	0	1053	0	1083	2	1307	130	890
chr22.32941534.G.T	na	na	NoRepeat	0	181	0	136	41	205	1	174
chr1.205421956.A.T	na	na	NoRepeat	0	1768	0	1735	0	2224	263	1604
chr1.191542512.A.G	na	na	NoRepeat	0	592	101	424	9	104	0	191
chr15.20102102.A.C	na	na	NoRepeat	0	614	1	661	0	896	104	488
chr7.51454422.C.T	na	na	CpG_COBL_69759	0	31	0	39	1	46	12	58
chr5.2513445.T.A	na	na	NoRepeat	0	1102	0	1086	160	1146	0	474
chr4.153152891.G.A	na	na	chr4_153152701_153153567	0	395	0	358	0	404	21	437
chr18.26149624.C.A	na	na	NoRepeat	0	825	0	587	104	753	0	532
chr2.76091584.G.T	na	na	V$TGIF_01	0	982	26	838	176	917	222	984
chr2.210263515.A.C	na	na	NoRepeat	0	988	0	942	0	1255	90	532
chr14.98356909.A.T	na	na	NoRepeat	0	1223	1	931	0	1401	193	928
chr6.133644483.C.A	na	na	chr6_133644324_133644479	1	810	0	659	0	1022	130	729
chr21.31991833.T.C	na	na	NoRepeat	0	371	62	288	0	82	0	237
chr14.84953028.T.A	na	na	NoRepeat	0	1981	390	1489	420	1386	207	1169
chr1.184261652.G.T	na	na	NoRepeat	0	1428	0	1313	4	1633	235	1202
chr15.102083324.C.A	na	na	NoRepeat	0	1057	199	1033	187	1158	0	1936
chr3.15749710.C.T	na	na	NoRepeat	0	1503	254	990	1	1266	2	1203
chr18.67010202.G.T	na	na	NoRepeat	3	1265	422	798	270	803	385	626
chr12.107921616.G.A	na	na	NoRepeat	0	653	0	495	84	731	0	581
chr14.89398178.C.G	na	na	chr14_89398076_89398192	0	1072	9	475	2	671	262	816
chr6.152391285.T.A	na	na	NoRepeat	0	1355	0	1078	1	1629	214	1132
chr13.102978344.A.T	na	na	NoRepeat	0	1548	50	1400	0	1539	0	1139
chr1.190948936.G.T	na	na	NoRepeat	0	1016	0	886	0	1198	191	683
chr9.44825526.A.T	na	na	chr9_44825443_44825735	0	773	179	710	301	973	474	838
chr4.21953938.G.A	na	na	NoRepeat	0	1788	0	1554	1	1823	257	1436
chr2.22035134.G.A	na	na	NoRepeat	1	1199	252	1213	216	1388	159	1024
chr2.220214903.T.A	na	na	NoRepeat	0	1322	0	1371	0	1387	353	1112
chr14.83049201.C.G	na	na	chr14_83049198_83049340	0	1204	0	970	0	1483	305	754
chr13.88560681.A.T	na	na	NoRepeat	0	1606	307	1238	182	1305	0	1115
chr4.12305983.G.T	na	na	NoRepeat	0	1571	520	1229	208	1263	452	1233
chr10.107659810.A.T	na	na	NoRepeat	0	1191	0	767	206	1205	0	811
chr1.245703516.C.G	na	na	NoRepeat	0	1503	0	1428	0	1782	207	1297
chr15.37263030.C.A	na	na	chr15_37262785_37263250	0	936	0	899	149	933	0	692
chr3.120571710.G.T	na	na	chr3_120571625_120571724	1	1148	370	722	365	928	648	908
chr13.35538234.C.A	na	na	NoRepeat	0	522	0	448	0	651	93	467
chr16.7452222.T.C	na	na	NoRepeat	0	738	0	605	125	796	0	632
chr18.65064123.C.A	na	na	NoRepeat	3	2291	374	1439	298	1658	0	1301
chr14.28155653.G.T	na	na	NoRepeat	0	2215	340	1387	504	1884	449	1354
chr14.43461009.C.A	na	na	NoRepeat	0	1324	1	973	0	1496	327	1129
chr5.19329897.G.C	na	na	NoRepeat	0	1469	225	1626	306	1826	278	921
chr4.181086150.A.C	na	na	chr4_181086114_181086218	0	1099	0	1094	0	1462	112	811
chr1.216263249.T.A	na	na	NoRepeat	0	1524	246	1194	167	1078	336	1046
chr3.127092649.G.C	na	na	NoRepeat	0	1111	267	896	139	767	0	1058
chr22.36387739.C.T	na	na	NoRepeat	0	1167	0	953	203	1263	0	1072
chr6.69041093.A.C	na	na	NoRepeat	0	951	0	541	0	828	262	663
chr13.57043126.T.G	na	na	NoRepeat	0	1324	0	1119	0	1526	364	924
chr14.39945080.G.C	na	na	NoRepeat	0	1346	202	974	164	1282	344	1066
chr1.214318482.C.A	na	na	NoRepeat	0	873	0	919	0	1287	223	738
chr6.57220426.C.G	na	na	NoRepeat	0	1775	177	2476	231	2385	121	3228
chr7.133343148.C.A	na	na	NoRepeat	0	1721	4	1513	1	2161	358	1777
chr13.71096512.G.T	na	na	NoRepeat	0	251	36	269	0	356	0	264
chr14.44369742.C.A	na	na	NoRepeat	0	747	0	611	0	887	75	588
chr3.77087803.C.T	na	na	chr3_77087697_77087867	0	1428	286	1336	119	1384	736	1911
chr11.45711415.G.A	na	na	chr11_45711272_45711448	0	1035	0	1166	185	1051	2	1291
chrX.38430751.C.G	na	na	NoRepeat	0	1156	231	926	146	1119	0	638
chr18.49443505.G.A	na	na	NoRepeat	0	1221	0	952	214	1118	0	784
chr4.76250777.T.G	na	na	chr4_76250598_76250911	0	891	0	888	0	1236	124	750
chr3.6297695.T.C	na	na	NoRepeat	0	1462	207	1009	2	1283	0	1212
chr13.64813586.T.A	na	na	NoRepeat	0	1248	0	981	4	1394	151	890
chr14.53950353.T.C	na	na	NoRepeat	0	1141	186	905	0	1115	0	992
chr13.55099588.T.G	na	na	chr13_55099332_55099705	0	833	0	710	0	975	238	594
chr2.206642045.G.A	na	na	chr2_206642034_206642135	0	1868	0	1650	324	2098	0	1309
chr3.110433294.T.G	na	na	NoRepeat	1	1261	0	917	241	1138	0	1038
chr6.128423284.C.A	na	na	NoRepeat	0	1397	1	1067	322	1368	0	644
chr15.78964112.G.A	na	na	V$CART1_01	0	1542	553	1426	504	1564	657	1261
chrX.91191777.A.T	na	na	NoRepeat	0	1607	319	1554	186	1321	0	1138
chr6.150607969.C.T	na	na	chr6_150607851_150607959	0	1078	242	871	444	1201	222	956
chr13.109957031.A.C	na	na	NoRepeat	0	1073	138	786	0	907	0	801
chr3.2788156.A.C	na	na	chr3_2788158_2788299	0	1740	629	1224	472	1217	800	1195
chr11.123963386.G.T	na	na	NoRepeat	0	663	0	1247	193	1174	3	819
chr10.118677403.A.C	na	na	V$GATA1_04	0	1046	0	882	160	1091	0	668
chr13.63029422.A.C	na	na	NoRepeat	0	1117	0	884	222	1289	0	896
chr2.162754531.C.A	na	na	NoRepeat	0	1378	0	1511	1	1853	206	1105
chr18.68728145.G.T	na	na	NoRepeat	2	1458	296	1047	172	1010	0	832
chr13.33914857.A.G	na	na	NoRepeat	0	831	180	609	99	688	0	667
chr13.44000373.A.C	na	na	NoRepeat	1	1341	185	884	0	1056	0	830
chr3.55124320.C.A	na	na	NoRepeat	0	892	0	631	0	839	134	838
chr13.28170942.A.C	na	na	NoRepeat	0	1345	302	1104	235	1076	447	995
chr10.10412973.G.T	na	na	NoRepeat	0	996	0	697	171	977	0	645
chrX.21289604.T.C	na	na	NoRepeat	0	2167	174	1764	0	1790	0	1021
chr2.232046890.T.G	na	na	NoRepeat	0	571	0	501	112	655	0	467
chr18.64202943.A.G	na	na	NoRepeat	0	130	32	79	30	70	41	70
chr2.212794389.T.A	na	na	chr2_212794116_212794387	0	485	0	456	0	714	39	317
chr3.34959241.C.A	na	na	NoRepeat	0	1398	0	1077	0	1443	374	1171
chr10.55924385.T.G	na	na	NoRepeat	0	2487	356	1238	0	1329	1	1295
chr13.83793578.C.G	na	na	NoRepeat	0	941	0	762	0	1088	124	629
chr16.5521481.G.C	na	na	NoRepeat	0	771	0	568	94	660	0	575
chr2.71625034.G.A	na	na	NoRepeat	0	1122	0	1028	277	1460	0	1624
chr7.124735948.A.C	na	na	NoRepeat	0	1039	0	960	0	1334	184	900
chr13.90929959.C.T	na	na	NoRepeat	0	1217	0	952	166	1232	0	888
chr13.68824646.T.G	na	na	chr13_68824617_68825080	0	708	0	573	130	749	0	481
chr13.102986159.A.C	na	na	NoRepeat	0	1283	0	1037	0	1275	186	883
chr5.19229134.G.T	na	na	NoRepeat	0	861	169	932	137	1065	153	540
chrX.140354900.G.T	na	na	NoRepeat	0	175	0	158	0	167	29	185
chr3.33778262.T.A	na	na	NoRepeat	0	1194	488	828	306	995	703	966
chr10.114034358.A.T	na	na	NoRepeat	0	782	0	605	99	652	0	557
chr9.44080693.C.T	na	na	NoRepeat	0	418	3	398	14	462	4	383
chr4.21535501.G.T	na	na	NoRepeat	2	935	0	875	147	961	0	759
chr2.210391671.C.A	na	na	NoRepeat	0	1864	834	1812	573	1873	686	1200
chr11.2922900.C.T	na	na	NoRepeat	0	955	365	734	518	1203	439	703
chr13.58709264.C.A	na	na	NoRepeat	0	1118	193	870	0	980	0	808
chr2.189032598.G.T	na	na	NoRepeat	1	480	2	486	1	623	50	318
chr2.210366423.G.C	na	na	chr2_210366230_210366503	0	1425	273	1493	234	1671	219	1097
chr2.229725544.G.A	na	na	NoRepeat	0	1442	0	1453	218	1404	0	1663
chr1.237381292.C.A	na	na	chr1_237381155_237381501	0	1479	0	1436	0	1932	410	1362
chr19.41414574.G.T	na	na	chr19_41414397_41414573	1	648	199	506	84	512	191	475
chr7.110231428.C.A	na	na	NoRepeat	0	919	0	820	0	1156	204	911
chr3.61206092.C.A	na	na	chr3_61205611_61206100	1	1236	0	815	178	1144	0	1009
chr10.107541788.G.T	na	na	NoRepeat	0	57	0	41	16	51	0	35
chr3.28538090.G.T	na	na	NoRepeat	0	977	0	827	185	942	0	953
chr3.163718835.C.A	na	na	NoRepeat	0	1143	264	866	124	978	0	1169
chr8.42700327.G.T	na	na	NoRepeat	1	1996	691	1899	397	1858	986	2080
chr3.162946599.G.A	na	na	NoRepeat	0	1212	0	980	261	1448	1	1187
chr5.145707230.G.A	na	na	chr5_145707118_145707757	0	1316	0	1189	264	1452	0	1510
chr3.33649812.T.A	na	na	NoRepeat	0	1419	0	1242	0	1675	180	1369
chrX.348118.A.C	na	na	CpG_PPP2R3B_0	0	103	0	114	0	169	22	163
chr2.130745144.G.A	na	na	NoRepeat	0	398	0	474	70	714	0	548
chr9.20251322.G.T	na	na	NoRepeat	0	764	119	643	96	551	168	480
chr7.135000692.C.A	na	na	NoRepeat	0	476	0	543	0	739	75	514
chr7.154474650.G.T	na	na	NoRepeat	0	906	0	1064	0	1477	125	952
chr22.18593906.G.A	na	na	CpG_TUBA8_0	0	290	0	317	46	386	0	307
chr7.110145373.C.T	na	na	NoRepeat	0	1111	41	1110	359	1536	501	1100
chr17.1162651.G.C	na	na	NoRepeat	0	1492	310	1097	317	1514	252	1067
chr18.73045111.C.G	na	na	NoRepeat	0	1068	0	784	193	989	0	674
chr10.107906537.C.A	na	na	chr10_107906408_107906733	0	1169	0	948	231	1274	0	841
chr2.180720387.G.A	na	na	chr2_180719989_180720429	0	948	0	933	162	1193	0	705
chr3.105899659.T.C	na	na	NoRepeat	0	1202	229	797	176	919	332	912
chr10.125374649.G.T	na	na	NoRepeat	1	721	1	541	98	715	2	461
chr12.104242441.T.C	na	na	NoRepeat	1	1159	242	954	165	711	277	875
chr4.162728157.A.T	na	na	NoRepeat	0	911	0	889	0	1193	117	854
chr1.205898656.A.C	na	na	NoRepeat	0	1317	422	1116	428	1186	429	1110
chr5.120846504.C.A	na	na	NoRepeat	0	27	0	37	0	37	8	27
chr10.69081343.T.G	na	na	NoRepeat	0	1483	454	961	566	1414	412	797
chr3.145031745.A.T	na	na	NoRepeat	0	1752	373	1289	287	1452	0	1139
chr1.247768723.T.G	na	na	NoRepeat	0	29	0	31	0	41	6	22
chr13.64138552.G.C	na	na	NoRepeat	0	930	154	690	175	937	0	570
chr9.19647745.C.A	na	na	NoRepeat	0	993	0	767	197	1221	6	831
chr3.26152432.A.G	na	na	NoRepeat	1	1210	1	942	209	1299	0	1004
chr1.208187543.G.A	na	na	NoRepeat	1	896	0	690	1	1014	207	685
chr4.42731824.A.T	na	na	NoRepeat	0	950	0	934	0	908	124	808
chr2.79874335.G.T	na	na	NoRepeat	0	1560	0	1399	0	1486	201	1254
chr10.123279968.G.A	na	na	NoRepeat	0	1325	0	1091	326	1498	0	908
chr5.152315314.C.A	na	na	NoRepeat	0	422	0	407	76	522	0	404
chr14.41911154.T.C	na	na	NoRepeat	0	875	155	626	129	769	0	710
chr13.93559595.A.G	na	na	NoRepeat	0	492	0	465	97	565	0	347
chr1.17641215.G.A	na	na	NoRepeat	0	885	218	776	294	809	156	679
chr13.71719604.T.A	na	na	NoRepeat	0	643	107	445	0	572	0	366
chr14.86179483.C.A	na	na	chr14_86179432_86179578	0	1246	0	941	2	1583	142	958
chr5.12020195.T.A	na	na	NoRepeat	0	1012	0	2403	183	2106	0	700
chr18.46593501.A.G	na	na	NoRepeat	0	454	3	288	4	356	3	240
chr3.17315778.T.G	na	na	NoRepeat	0	1399	0	1218	0	1556	255	1441
chr13.101760014.G.A	na	na	chr13_101760005_101760174	0	1042	0	931	1	1185	177	757
chr3.13717722.T.A	na	na	NoRepeat	0	965	2	817	0	1005	124	902
chr13.89271329.G.T	na	na	NoRepeat	0	1326	2	1158	210	1401	0	1002
chr6.10095710.G.T	na	na	NoRepeat	4	1129	2	902	139	969	2	891
chr3.16209308.A.T	na	na	NoRepeat	0	1230	0	901	0	1389	146	1167
chr1.204811571.T.C	na	na	NoRepeat	0	1556	2	1403	0	1773	232	1297
chr13.79839896.G.A	na	na	V$CDP_01	0	1641	0	1255	312	1698	0	1117
chr13.30616070.T.C	na	na	NoRepeat	0	1447	305	1195	162	1051	0	1141
chr2.200061444.C.T	na	na	NoRepeat	0	1833	337	1711	278	1657	0	1245
chr1.227308350.C.A	na	na	NoRepeat	0	893	0	842	0	1275	130	789
chr17.36314284.G.A	na	na	NoRepeat	0	3837	207	3802	222	4330	292	3813
chr18.38643805.C.A	na	na	NoRepeat	0	1736	300	1265	225	1561	370	1014
chr10.29901498.C.T	na	na	NoRepeat	0	821	0	482	161	874	0	518
chr15.90913952.G.A	na	na	NoRepeat	0	1118	5	1203	2	1718	134	907
chr3.305794.G.A	na	na	NoRepeat	0	1214	0	867	168	1213	1	936
chr7.114002107.A.T	na	na	NoRepeat	0	1103	0	1150	181	1576	181	1166
chr8.114318804.C.T	na	na	NoRepeat	0	581	65	413	0	115	0	409
chr7.91318161.C.G	na	na	NoRepeat	0	568	0	609	0	892	76	649
chr3.2259302.G.A	na	na	NoRepeat	0	1206	0	890	0	1170	210	841
chr15.39232765.T.C	na	na	NoRepeat	0	1488	0	1515	232	1532	1	1294
chr7.124931341.A.G	na	na	chr7_124931164_124931427	0	905	0	882	0	1336	254	1016
chr13.88476283.C.T	na	na	NoRepeat	1	1603	846	1462	576	1560	783	1208
chr3.55124321.C.A	na	na	NoRepeat	0	902	0	633	0	841	134	845
chr2.236271436.T.C	na	na	NoRepeat	0	1133	0	1200	186	1150	0	932
chr2.78240429.G.A	na	na	NoRepeat	0	1110	0	849	0	975	117	835
chr2.82638574.C.A	na	na	NoRepeat	1	791	0	651	0	809	258	763
chr7.99386389.G.C	na	na	NoRepeat	0	1410	807	1272	434	1484	381	1547
chr7.65150898.C.T	na	na	NoRepeat	0	304	0	131	0	480	89	485
chr6.63135095.C.G	na	na	NoRepeat	0	506	14	582	55	508	0	650
chr12.68266470.C.T	na	na	NoRepeat	0	1380	196	1057	0	1204	0	1019
chr2.79502254.C.G	na	na	NoRepeat	0	1144	0	849	0	1093	124	988
chr6.105521778.T.C	na	na	NoRepeat	0	724	0	510	159	800	0	680
chr12.67770676.A.G	na	na	NoRepeat	0	1107	228	834	220	1012	268	867
chr13.26115704.G.A	na	na	NoRepeat	0	962	0	827	0	1130	194	841
chr1.209024991.G.A	na	na	NoRepeat	0	1320	0	1254	0	1693	210	1156
chr12.94389905.C.G	na	na	NoRepeat	0	1546	0	1083	309	1369	0	1124
chr1.14775846.G.C	na	na	NoRepeat	0	1817	249	1434	0	1699	1	1635
chr7.93447278.A.T	na	na	NoRepeat	0	1307	0	1251	0	1701	150	1333
chr6.133907107.T.A	na	na	NoRepeat	0	1470	0	1123	227	1450	0	1280
chr3.67004553.T.C	na	na	NoRepeat	0	945	2	498	38	587	103	922
chr18.23220025.C.T	na	na	chr18_23219494_23220018	0	1209	238	1001	0	825	0	865
chr4.11791176.C.A	na	na	chr4_11791017_11791169	0	1116	0	992	126	855	0	992
chr1.11358684.G.T	na	na	NoRepeat	0	658	100	511	0	473	0	508
chr2.189070157.C.A	na	na	NoRepeat	0	1181	0	1267	239	1401	0	833
chr1.214127459.C.G	na	na	chr1_214127056_214127464	0	338	0	278	0	382	47	278
chr1.15575591.A.C	na	na	NoRepeat	0	1498	384	1253	284	1823	837	1469
chr2.228025467.G.A	na	na	NoRepeat	0	660	2	600	0	644	96	576
chr13.40433283.T.C	na	na	V$TATA_C	0	1126	0	823	232	1259	0	777
chr3.35556741.A.C	na	na	NoRepeat	0	781	0	640	96	783	0	734
chr3.18467093.T.A	na	na	V$BRN2_01	0	686	0	529	0	712	55	609
chr1.210357005.C.T	na	na	NoRepeat	0	845	0	803	0	1324	107	829
chr3.10660165.C.A	na	na	NoRepeat	0	883	180	688	0	755	0	761
chrX.29002728.C.G	na	na	NoRepeat	0	1481	0	1182	226	1794	0	724
chr1.195806909.G.A	na	na	NoRepeat	0	1167	0	1215	0	1485	168	1094
chr13.82816476.T.C	na	na	NoRepeat	0	910	0	612	0	820	110	699
chr18.64611884.A.C	na	na	NoRepeat	0	1572	557	1101	413	1096	526	906
chr1.205072856.G.C	na	na	NoRepeat	0	927	0	839	0	1249	193	713
chr2.230277390.C.A	na	na	NoRepeat	0	784	0	761	0	914	321	924
chr13.88623118.C.A	na	na	NoRepeat	0	1836	243	1136	168	925	179	937
chr2.236271435.C.A	na	na	NoRepeat	2	1156	0	1209	186	1179	0	943
chr9.68193616.A.T	na	na	NoRepeat	1	497	91	369	71	231	204	396
chr13.80246498.A.T	na	na	NoRepeat	0	661	0	489	0	623	103	452
chr18.75567458.A.G	na	na	NoRepeat	0	1165	212	745	0	769	0	768
chr14.63311631.T.A	na	na	chr14_63311530_63311697	0	1201	0	1008	0	1581	245	884
chr7.108042270.G.T	na	na	NoRepeat	2	1078	637	1011	311	1141	190	1042
chr10.129353570.A.T	na	na	NoRepeat	0	1384	0	1040	197	1255	0	867
chr1.177026051.T.C	na	na	NoRepeat	0	1460	0	1488	0	1937	438	1266
chr7.67365391.A.G	na	na	NoRepeat	0	1605	410	1537	0	1825	0	1967
chr3.11781618.G.A	na	na	chr3_11781592_11781774	0	294	0	248	0	365	31	305
chr7.154151853.T.A	na	na	NoRepeat	0	914	0	957	0	1243	225	927
chr3.104269931.C.A	na	na	NoRepeat	0	786	0	622	132	807	0	528
chr3.109704730.G.C	na	na	NoRepeat	0	1106	0	898	0	1419	177	1004
chr13.71376825.G.A	na	na	NoRepeat	0	1762	636	1282	530	1632	593	1023
chr7.114701248.T.C	na	na	NoRepeat	0	548	0	591	0	970	93	518
chr6.31683722.G.A	na	na	chr6_31683721_31683824	0	437	0	515	41	362	3	397
chr4.34304754.T.C	na	na	NoRepeat	0	1255	0	1159	0	1313	289	1157
chr10.110682243.C.T	na	na	NoRepeat	0	1387	239	1007	147	904	113	741
chr6.116714196.G.A	na	na	NoRepeat	0	1468	262	939	213	1189	1	584
chr18.23257689.A.G	na	na	chr18_23257597_23257973	0	1161	0	929	204	1256	0	954
chr2.212221369.T.A	na	na	NoRepeat	0	2268	397	1872	273	1689	0	1236
chr14.85925904.A.T	na	na	chr14_85925781_85925996	0	724	0	489	0	840	68	512
chr15.38233793.A.G	na	na	NoRepeat	0	1341	0	1382	185	1222	0	1019
chr10.43203936.A.T	na	na	NoRepeat	0	746	0	638	173	858	0	565
chr3.156491504.C.T	na	na	NoRepeat	0	1337	194	951	0	972	1	964
chr3.40338662.T.C	na	na	NoRepeat	1	2071	454	1542	265	1757	606	1754
chr8.4258162.G.T	na	na	NoRepeat	0	1713	620	1088	384	1103	707	1142
chr6.129066567.C.A	na	na	NoRepeat	0	1613	269	1326	0	1518	0	699
chr2.223263425.G.T	na	na	NoRepeat	0	1279	0	1312	220	1417	1	1404
chr13.37934672.A.T	na	na	NoRepeat	0	532	0	617	0	808	107	506
chr4.3736238.C.T	na	na	NoRepeat	0	845	5	801	0	772	96	727
chr13.102986158.C.A	na	na	NoRepeat	0	1317	0	1054	0	1297	181	896
chr2.129957790.A.G	na	na	NoRepeat	0	307	0	332	0	350	24	218
chr3.34789309.C.T	na	na	NoRepeat	0	1708	0	1355	0	1699	280	1417
chr2.77350885.A.T	na	na	NoRepeat	0	1338	228	946	0	1112	0	951
chr16.9773540.C.A	na	na	NoRepeat	1	2173	341	1473	0	1418	1	1538
chr8.28213227.G.A	na	na	NoRepeat	0	1152	536	910	226	834	401	763
chr2.222737404.G.A	na	na	NoRepeat	0	1495	0	1707	270	1659	0	2137
chr14.36157027.T.C	na	na	NoRepeat	0	1001	508	865	465	1045	653	944
chr14.27910783.G.T	na	na	NoRepeat	0	1117	0	984	0	1334	267	986
chr10.121261406.T.C	na	na	NoRepeat	0	1000	1	820	198	1096	0	722
chr12.74528039.G.T	na	na	chr12_74528047_74528287	1	1200	0	1068	229	1379	2	865
chr7.10138432.C.A	na	na	NoRepeat	0	54	0	45	15	50	0	29
chr4.33440259.G.T	na	na	NoRepeat	0	1417	0	1492	0	1686	190	1331
chr7.131779681.G.T	na	na	NoRepeat	0	1360	1	1357	231	1751	249	1324
chr16.34199106.A.C	na	na	NoRepeat	0	30	0	30	7	33	0	41
chr20.22975173.G.A	na	na	NoRepeat	1	1619	575	1656	464	1374	383	1537
chr2.64575994.T.C	na	na	NoRepeat	0	1304	0	1266	0	1620	308	1358
chr3.113156499.C.T	na	na	NoRepeat	1	1679	0	1381	325	1710	1	1504
chr10.7954035.A.C	na	na	NoRepeat	0	877	158	616	207	1098	189	466
chr7.144217414.T.A	na	na	chr7_144217392_144217603	0	1289	0	1126	0	1701	156	1319
chr3.20896404.T.C	na	na	NoRepeat	0	485	42	320	45	350	44	324
chr4.77355369.T.A	na	na	NoRepeat	0	779	0	1104	0	1190	119	771
chr17.31591938.C.A	na	na	NoRepeat	0	919	0	827	184	832	0	974
chr10.54763056.A.G	na	na	NoRepeat	0	719	0	503	133	884	0	480
chr13.71208860.A.C	na	na	chr13_71208691_71209209	0	1126	0	969	0	1293	95	681
chr10.107613137.A.G	na	na	NoRepeat	0	1523	280	1119	273	1372	0	1006
chr8.23208785.T.G	na	na	NoRepeat	0	522	89	384	54	308	0	397
chr14.101179806.C.T	na	na	NoRepeat	0	183	0	127	0	193	26	165
chr7.105316812.C.A	na	na	NoRepeat	0	911	0	843	0	1181	100	977
chr2.185295426.G.T	na	na	NoRepeat	1	706	0	887	1	1087	207	616
chr1.73498043.C.T	na	na	NoRepeat	0	67	5	39	0	72	0	56
chr18.37623098.G.T	na	na	chr18_37623054_37623328	0	895	0	721	168	957	1	630
chr7.153582268.T.C	na	na	NoRepeat	0	1152	0	1068	0	1576	248	1263
chr6.137591186.T.A	na	na	NoRepeat	0	1089	0	738	144	1106	0	852
chr10.77875900.A.G	na	na	NoRepeat	0	836	0	612	132	888	0	683
chr3.114187110.A.C	na	na	NoRepeat	0	1358	640	1073	480	1215	748	1137
chr22.36387740.C.G	na	na	NoRepeat	0	1159	0	951	210	1261	0	1061
chr13.83693517.G.A	na	na	NoRepeat	0	556	91	290	38	292	139	327
chr3.126137285.C.T	na	na	NoRepeat	0	464	0	335	73	402	0	462
chr1.195806910.A.T	na	na	NoRepeat	0	1146	0	1200	0	1470	163	1073
chr12.97625604.T.C	na	na	NoRepeat	0	2289	380	1548	0	1847	0	1534
chr10.2010792.C.A	na	na	V$GATA1_02	2	1406	0	855	266	1524	0	794
chr6.170424712.C.A	na	na	NoRepeat	0	1062	0	1370	1	1127	263	873
chr5.49889862.C.A	na	na	NoRepeat	0	532	0	487	73	587	0	647
chr12.72748383.T.A	na	na	NoRepeat	0	1005	135	622	107	602	169	617
chr18.70085455.A.C	na	na	NoRepeat	0	822	0	738	196	868	0	534
chr13.78661880.T.A	na	na	V$CART1_01	0	1111	0	844	133	945	0	761
chr13.82586471.T.A	na	na	V$TST1_01	0	1291	0	963	184	1340	0	944
chr14.27858731.G.T	na	na	NoRepeat	1	1472	232	941	1	1341	0	1118
chr6.14710284.C.T	na	na	NoRepeat	0	965	0	1006	0	1188	121	875
chr14.69179131.G.A	na	na	NoRepeat	0	1077	0	803	0	1325	165	783
chr3.4686825.G.A	na	na	NoRepeat	1	1146	0	856	0	1259	207	1093
chr14.52246329.G.T	na	na	NoRepeat	2	747	179	657	197	1124	224	726
chr13.73151552.T.C	na	na	NoRepeat	0	592	0	435	0	195	87	360
chr2.124064849.T.A	na	na	NoRepeat	0	1916	380	1735	277	1818	492	1464
chr1.182652200.G.T	na	na	NoRepeat	0	1257	0	1131	0	1457	157	1002
chr13.42734772.G.A	na	na	NoRepeat	0	487	0	378	0	542	155	421
chr3.29631218.T.C	na	na	chr3_29630989_29631289	0	1102	0	868	0	1363	272	899
chr2.190892769.T.G	na	na	NoRepeat	0	852	0	896	0	1238	60	646

## Sheet: SuppTable4
Supplementary Table S4. SJOS0011107 SNVs detected by capture validation and tumor purity
					Site:	D1	D1	M1	M1	M2	M2
					Tumor Purity:	0.42		0.36		0.4
					Anatomy:	Primary tumor at left proximal humerus	Primary tumor at left proximal humerus	Lung right upper lobe metastasis (at diagnosis)	Lung right upper lobe metastasis (at diagnosis)	Lung left lower lobe metastasis	Lung left lower lobe metastasis
Chrom.Site.Ref.Alt	Gene	AminoAcidChange	Class	Germline_MutantReads	Germline_TotalReads	D1_MutantReads	D1_TotalReads	M1_MutantReads	M1_TotalReads	M2_MutantReads	M2_TotalReads
chr8.26721707.C.T	ADRA1A	R260R	silent	0	281	0	185	0	174	27	184
chr16.89349516.C.T	ANKRD11	R1145K	missense	0	617	0	513	0	160	50	357
chr18.9281213.G.A	ANKRD12	E13_UTR_3	UTR_3	1	2432	6	2243	138	663	555	2163
chr10.27382638.G.A	ANKRD26	N111N	silent	0	401	0	227	35	379	0	369
chr10.46122071.T.G	ANUBL1	S400S	silent	0	1006	230	560	335	701	320	663
chr4.122589614.C.A	ANXA5	E13_UTR_3	UTR_3	2	1247	232	596	178	632	171	557
chr1.161019484.T.C	ARHGAP30	P473_E11splice	splice	0	432	0	399	0	364	51	384
chr12.14577287.C.T	ATF7IP	S146S	silent	1	570	172	336	85	274	181	338
chr3.182989047.A.G	B3GNT5	E2_UTR_3	UTR_3	0	2590	21	3132	277	1221	659	2476
chr7.72892428.G.A	BAZ1B	R455W	missense	1	1559	12	1371	120	1378	153	1397
chr14.99639114.G.A	BCL11B	E4_UTR_3	UTR_3	0	906	0	1179	0	822	89	853
chrX.50659365.C.A	BMP15	P313T	missense	0	324	0	246	1	283	59	366
chr17.65907539.C.T	BPTF	P1180L	missense	0	1690	1	1679	87	622	209	1793
chr6.26413538.G.A	BTN3A1	C387Y	missense	0	2235	1153	2086	741	1217	1118	2015
chr18.21086938.G.C	C18orf8	D62H	missense	0	595	5	358	54	378	60	412
chr3.133647445.A.T	C3orf36	L68Q	missense	0	353	0	191	0	180	34	216
chr6.168188107.C.T	C6orf123	E3_exon	exon	0	260	0	272	0	194	30	215
chr1.100985419.G.A	CDC14A	E16_UTR_3	UTR_3	0	779	181	686	189	827	227	923
chr11.117261758.G.T	CEP164	E704*	nonsense	4	1136	0	850	0	338	109	986
chr16.66976630.G.A	CES2	K518K	silent	0	499	0	753	0	424	48	553
chr13.53049549.A.G	CKAP2	E9_UTR_3	UTR_3	1	2150	736	1456	321	757	912	1918
chr2.29406191.T.C	CLIP4	E16_UTR_3	UTR_3	0	985	0	938	1	1174	84	1041
chr14.95648865.C.T	CLMN	E13_UTR_3	UTR_3	0	324	107	339	93	311	111	337
chr11.100211331.C.A	CNTN5	A956D	missense	0	2423	321	1645	278	1265	546	1972
chr1.85036298.C.T	CTBS	A95T	missense	0	390	0	396	0	385	54	383
chr4.187133653.A.T	CYP4V2	E11_UTR_3	UTR_3	0	982	0	1062	1	906	75	586
chr2.84934041.G.A	DNAH6	A2917T	missense	2	934	0	996	1	902	109	987
chr17.41844426.G.A	DUSP3	E3_UTR_3	UTR_3	0	1828	0	1995	0	597	185	1877
chr7.109599775.C.T	EIF3IP1	E1_exon	exon	0	1316	0	1239	0	428	134	1180
chr6.66042004.G.C	EYS	E12_UTR_3	UTR_3	0	857	202	440	209	560	67	337
chr11.95502367.C.T	FAM76B	E10_UTR_3	UTR_3	0	2593	0	2591	0	1162	293	2507
chr11.125359614.C.T	FEZ1	S20S	silent	1	525	4	413	54	437	64	518
chr3.69351571.C.T	FRMD4B	W113*	nonsense	2	2142	2	1866	90	699	256	1937
chr15.91426565.G.T	FURIN	E16_UTR_3	UTR_3	0	168	0	202	0	179	23	185
chr4.80328039.G.T	GK2	A439E	missense	2	2273	806	2112	292	1075	445	1928
chr14.67147866.G.T	GPHN	G36W	missense	0	983	0	931	0	930	83	828
chr15.42861931.A.G	HAUS2	E6_UTR_3	UTR_3	0	1110	2	1242	98	1091	13	858
chr14.31762043.T.C	HEATR5A	E30_UTR_3	UTR_3	1	319	0	320	0	361	39	421
chr5.41052576.G.C	HEATR7B2	N407K	missense	0	2306	1030	2102	348	1029	2004	3796
chr19.53553886.T.A	HERV-V2	L461Q	missense	0	723	0	805	0	552	67	558
chr1.166882905.A.C	ILDR2	E10_UTR_3	UTR_3	0	1896	0	1852	0	868	221	1797
chr21.39672385.C.A	KCNJ15	E4_UTR_3	UTR_3	1	671	2	803	55	689	79	732
chr6.17828590.C.T	KIF13A	R471R	silent	0	660	7	598	74	625	62	621
chr3.197769935.A.G	LMLN	E17_UTR_3	UTR_3	1	1845	467	1798	272	976	435	1367
chr1.4472217.G.T	LOC284661	E1_exon	exon	2	526	0	251	24	197	37	239
chr8.63892556.C.T	LOC643763	E1_exon	exon	0	1193	1	1255	1	1400	71	1170
chr1.99774690.A.T	LPPR4	E7_UTR_3	UTR_3	0	749	0	730	0	852	61	865
chr17.17911114.C.T	LRRC48	E13_UTR_3	UTR_3	0	756	0	1096	48	815	175	1330
chr6.90513133.T.C	MDN1	K81K	silent	1	1307	0	1103	0	720	139	954
chr16.82182277.T.C	MPHOSPH6	E5_UTR_3	UTR_3	1	919	0	411	1	399	73	391
chr17.8448795.G.A	MYH10	L458L	silent	0	528	149	806	135	923	188	1101
chr17.34856680.G.A	MYO19	L589L	silent	0	144	0	130	15	116	17	122
chr12.6635765.C.T	NCAPD2	T906T	silent	1	467	11	575	63	367	88	461
chr4.119178538.C.G	NDST3	E14_UTR_3	UTR_3	0	464	0	446	0	132	49	507
chr3.42662911.C.T	NKTR	D96_E6splice_region	splice_region	0	1300	0	1247	0	432	122	1410
chr4.149075825.C.T	NR3C2	E748K	missense	0	744	6	631	68	675	73	653
chr10.84746332.A.G	NRG3	E9_UTR_3	UTR_3	1	816	0	490	1	598	106	480
chr11.5841803.G.T	OR52N2	V80L	missense	0	1252	472	1046	149	376	421	1057
chr3.150932029.G.A	P2RY14	P26S	missense	0	1567	0	987	1	1326	109	1482
chr11.35006127.A.G	PDHX	D345G	missense	0	764	0	699	1	672	111	776
chr12.7343924.C.T	PEX5	Q111*	nonsense	0	286	5	396	115	433	109	477
chr12.7343014.C.G	PEX5	A14G	missense	0	156	1	190	55	229	76	272
chrX.18972424.C.T	PHKA2	R62H	missense	0	365	70	197	65	201	78	194
chr16.2160905.G.T	PKD1	A1421A	silent	0	590	0	567	0	25	83	530
chr1.204236600.C.G	PLEKHA6	K93_E5splice_region	splice_region	0	3089	991	2055	798	1282	1357	2386
chr1.156764609.G.A	PRCC	K441_E5splice_region	splice_region	0	1851	1	1999	1	834	255	1901
chr12.9315237.C.A	PZP	G915V	missense	0	621	0	412	0	388	62	437
chr11.36613960.A.G	RAG2	E2_UTR_3	UTR_3	0	1000	0	947	0	756	94	960
chr6.17293253.A.T	RBM24	E4_UTR_3	UTR_3	0	2377	0	1878	1	1183	233	2202
chr8.92972429.T.A	RUNX1T1	E11_UTR_3	UTR_3	0	1362	0	2445	0	2210	138	1862
chr2.167262937.T.C	SCN7A	N1401S	missense	0	1709	453	1495	150	733	240	1513
chr16.23227688.G.T	SCNN1G	E13_UTR_3	UTR_3	0	714	0	647	0	430	74	523
chr15.59191835.A.G	SLTM	Y297Y	silent	0	1758	0	2226	0	647	246	1741
chr16.4253179.G.T	SRL	H83N	missense	0	898	0	950	0	650	121	729
chr10.70641844.G.C	STOX1	E147D	missense	0	1367	8	1059	137	954	193	770
chr12.56399005.A.G	SUOX	E4_UTR_3	UTR_3	0	2205	1	2325	0	648	320	2240
chr4.68928439.G.C	SYT14L	E1_exon	exon	0	1927	362	1662	199	743	378	1611
chr22.42609684.C.T	TCF20	S543N	missense	1	434	0	441	0	476	94	620
chr3.141682756.T.C	TFDP2	Q201R	missense	0	884	0	605	70	590	120	608
chr2.218747059.C.T	TNS1	Q312_E15splice_region	splice_region	1	3065	9	3173	152	1278	645	3135
chr17.40094943.G.T	TTC25	K253N	missense	1	1235	6	1526	42	398	132	1216
chr20.57600804.C.T	TUBB1	E4_UTR_3	UTR_3	0	788	1	778	0	673	98	906
chr13.31233328.G.T	USPL1	Q1038H	missense	0	1613	0	1614	0	734	164	1551
chr12.6579719.G.A	VAMP1	E1_UTR_5	UTR_5	0	314	8	378	77	309	75	330
chr8.17153314.C.T	VPS37A	E12_UTR_3	UTR_3	0	923	2	648	73	736	0	648
chr19.58578302.G.A	ZNF135	T174T	silent	2	735	1	781	0	546	101	620
chr20.25666229.C.T	ZNF337	R75K	missense	0	1319	11	1153	96	351	362	1207
chr20.25666196.C.T	ZNF337	A83_E4splice_region	splice_region	0	1224	10	1079	80	301	347	1139
chr19.53642928.T.G	ZNF347	E5_UTR_3	UTR_3	0	785	0	571	0	476	65	498
chr19.21241139.A.G	ZNF430	E5_UTR_3	UTR_3	0	397	0	404	0	99	50	375
chr8.20262015.C.T	na	na	NoRepeat	0	770	0	847	0	752	200	580
chr10.115020635.T.C	na	na	NoRepeat	0	1639	1	1465	0	434	231	1745
chr4.82691518.T.C	na	na	V$CHX10_01	0	1040	6	1167	40	473	139	1102
chr8.41741420.A.G	na	na	NoRepeat	0	462	0	406	31	256	95	413
chr12.126875646.C.T	na	na	NoRepeat	0	1364	0	1082	0	476	117	1228
chr11.108180855.A.T	na	na	NoRepeat	0	1230	0	879	2	893	102	909
chr15.93526066.G.T	na	na	NoRepeat	1	2531	1	1791	0	2027	214	2240
chr2.124319334.G.C	na	na	NoRepeat	0	1443	756	1301	551	948	483	1035
chr3.85628169.T.A	na	na	NoRepeat	0	848	0	546	0	752	61	627
chr8.119436342.G.A	na	na	NoRepeat	0	1586	609	2075	497	2268	550	1900
chr14.88170285.G.A	na	na	NoRepeat	1	1009	0	1023	0	873	98	981
chr3.51748774.G.A	na	na	NoRepeat	0	1045	0	821	0	805	126	932
chr13.58231764.C.A	na	na	chr13_58231421_58231823	1	1236	0	662	0	807	106	778
chr13.87315062.T.C	na	na	NoRepeat	0	1178	0	744	0	893	75	818
chr7.126313714.C.A	na	na	NoRepeat	0	1713	519	1504	171	485	197	1335
chr22.17519788.T.A	na	na	NoRepeat	0	1312	483	1079	403	1329	481	1529
chr21.20307703.G.A	na	na	NoRepeat	1	1193	8	1195	210	1306	171	1134
chrX.124530115.T.G	na	na	NoRepeat	0	777	6	519	267	685	265	533
chr2.30607850.C.G	na	na	NoRepeat	3	1708	512	2437	435	1536	868	3006
chr9.23561970.T.C	na	na	NoRepeat	1	1520	0	1493	0	980	190	1028
chrX.118206997.G.A	na	na	NoRepeat	1	824	430	750	191	322	406	806
chr5.12270104.G.A	na	na	NoRepeat	0	572	233	607	238	691	241	639
chr3.154497352.C.A	na	na	NoRepeat	0	1149	283	624	275	624	342	724
chr17.9350379.C.G	na	na	V$RORA1_01	0	481	142	708	113	755	150	852
chr10.3544960.G.T	na	na	NoRepeat	0	607	1	420	50	445	65	429
chr4.33580303.A.T	na	na	NoRepeat	0	786	0	904	1	818	69	738
chr14.40885279.A.C	na	na	NoRepeat	0	923	21	967	350	1089	175	956
chrX.147323306.G.C	na	na	NoRepeat	0	1235	657	1053	413	705	525	1019
chr4.79053539.C.T	na	na	NoRepeat	0	1113	308	1291	213	759	283	1231
chr6.136898764.C.A	na	na	NoRepeat	0	767	0	769	0	574	76	656
chr21.15374130.G.C	na	na	NoRepeat	0	578	4	536	101	698	133	661
chr3.153753541.G.A	na	na	NoRepeat	0	949	0	518	0	871	75	880
chr6.161011855.C.A	na	na	NoRepeat	0	652	552	889	1	58	1	647
chr2.18617808.C.T	na	na	chr2_18617707_18618097	0	517	6	614	82	777	110	790
chr14.58093821.A.T	na	na	NoRepeat	0	953	0	1032	0	988	103	944
chr3.165680884.A.G	na	na	NoRepeat	0	949	2	744	102	1183	91	1042
chr7.84771605.A.T	na	na	NoRepeat	0	512	0	360	0	469	58	372
chr10.10068134.C.A	na	na	NoRepeat	0	1095	0	697	0	804	78	611
chr10.93544632.A.C	na	na	NoRepeat	1	759	2	539	53	588	99	464
chr10.100726257.T.C	na	na	NoRepeat	0	680	0	433	1	492	67	363
chr20.25667402.C.G	na	na	NoRepeat	0	502	0	315	66	344	92	337
chr4.55435685.C.G	na	na	NoRepeat	0	2040	1	3145	0	522	187	1971
chr1.58042680.A.T	na	na	chr1_58042638_58042859	0	783	0	680	0	624	81	724
chr18.76575074.A.G	na	na	NoRepeat	1	501	64	415	51	372	18	319
chr6.79195706.C.T	na	na	NoRepeat	0	864	6	573	81	685	80	557
chr6.70020352.G.T	na	na	NoRepeat	0	1130	0	1155	2	1331	115	876
chr4.28513633.A.T	na	na	NoRepeat	1	733	0	539	0	595	78	473
chr18.13915599.C.T	na	na	chr18_13915544_13915643	2	693	8	730	81	662	59	669
chr13.104244444.G.T	na	na	NoRepeat	0	923	3	507	0	823	70	677
chr3.47169844.T.A	na	na	NoRepeat	0	1126	0	809	0	776	116	927
chr9.27600691.C.T	na	na	NoRepeat	1	1116	0	988	0	770	148	716
chr4.67795661.G.A	na	na	chr4_67795439_67795800	1	1673	3	1599	57	566	193	1345
chr3.83322108.A.C	na	na	NoRepeat	0	533	2	324	73	473	45	441
chr12.79098702.T.A	na	na	NoRepeat	0	1033	0	505	0	683	57	655
chr2.103003088.A.G	na	na	NoRepeat	0	749	1	836	0	807	136	827
chr13.39706493.A.G	na	na	NoRepeat	0	611	237	456	245	481	255	454
chr19.5108446.G.T	na	na	NoRepeat	1	205	94	172	132	214	135	218
chr1.248473945.C.A	na	na	NoRepeat	0	779	0	548	1	640	93	570
chr5.9737928.C.A	na	na	NoRepeat	0	1085	7	1242	111	1225	0	1210
chr1.4761582.C.T	na	na	NoRepeat	0	724	1	717	0	527	118	646
chr18.75713783.C.A	na	na	NoRepeat	0	724	4	540	62	571	77	508
chr12.119252456.T.A	na	na	NoRepeat	0	1143	0	685	0	971	110	857
chr5.97713962.G.T	na	na	NoRepeat	0	1287	8	967	103	1402	129	1235
chr21.45369898.A.T	na	na	NoRepeat	0	151	0	223	0	196	25	213
chr9.16754259.C.T	na	na	NoRepeat	0	1150	7	987	94	667	190	844
chr2.75581276.A.G	na	na	NoRepeat	1	972	4	844	104	1247	88	913
chr21.27044856.G.A	na	na	NoRepeat	0	823	12	1202	142	946	179	900
chr7.117584928.G.T	na	na	NoRepeat	1	673	0	772	0	570	105	606
chr11.23032543.G.A	na	na	NoRepeat	0	467	0	347	0	412	60	457
chr11.23611935.G.T	na	na	NoRepeat	1	1261	0	873	0	1096	88	811
chr18.59052810.A.T	na	na	NoRepeat	0	928	186	538	172	613	157	460
chr5.168608353.G.T	na	na	NoRepeat	0	2256	798	2304	248	973	858	2221
chr5.135921336.A.T	na	na	NoRepeat	2	1665	0	1435	0	1604	90	1346
chr3.169409958.A.G	na	na	NoRepeat	2	1190	338	734	626	1031	731	1109
chr3.145008058.C.T	na	na	NoRepeat	0	1435	1	957	1	941	109	821
chr5.92094861.G.A	na	na	chr5_92094656_92094931	0	605	1	530	0	555	51	578
chr18.53024124.A.T	na	na	chr18_53024076_53024319	0	1066	0	692	0	759	97	602
chr12.40772410.A.G	na	na	NoRepeat	0	726	0	658	0	673	73	598
chr20.15440810.G.A	na	na	NoRepeat	2	1246	12	977	252	939	165	860
chr2.34230098.C.T	na	na	chr2_34229985_34230259	1	765	1	635	58	1054	54	951
chr3.139705442.G.A	na	na	NoRepeat	0	1621	0	1332	0	997	161	1068
chr15.98395045.T.C	na	na	NoRepeat	0	1498	0	1368	5	1510	139	1616
chr3.176151664.G.A	na	na	NoRepeat	0	1033	0	938	0	1340	56	1092
chr10.33690264.C.T	na	na	NoRepeat	0	976	0	724	0	848	91	857
chr2.211620542.G.T	na	na	NoRepeat	0	1090	0	891	0	1085	168	938
chr13.54204976.C.A	na	na	NoRepeat	0	1191	0	714	0	851	118	893
chr4.167335106.A.T	na	na	NoRepeat	0	795	349	848	73	449	166	870
chr6.98952730.A.C	na	na	NoRepeat	0	481	0	277	0	318	30	294
chr1.201068603.C.T	na	na	NoRepeat	0	480	0	402	0	351	74	402
chr10.85629154.C.T	na	na	NoRepeat	0	1907	0	1243	1	977	157	944
chr9.3951630.G.A	na	na	NoRepeat	0	1094	0	1093	0	1017	281	1132
chr8.117550012.G.A	na	na	NoRepeat	0	942	1	1390	0	1444	85	1151
chr7.131590225.C.T	na	na	NoRepeat	0	579	2	508	56	434	54	356
chr9.3855787.T.C	na	na	NoRepeat	0	556	7	772	77	594	249	766
chr7.155641651.G.A	na	na	NoRepeat	1	1434	344	1472	119	621	168	1389
chr4.71282252.C.T	na	na	NoRepeat	0	2075	0	2024	0	920	231	1925
chr10.130168023.T.C	na	na	NoRepeat	0	1266	4	963	82	719	139	978
chr14.28500419.C.G	na	na	NoRepeat	0	1512	501	1287	779	1720	727	1716
chr17.8435395.C.A	na	na	NoRepeat	0	373	41	559	28	585	64	743
chr6.94664092.G.A	na	na	NoRepeat	0	786	0	653	0	328	64	624
chr9.4042303.T.C	na	na	NoRepeat	0	704	0	815	0	688	152	772
chr3.23027720.C.A	na	na	NoRepeat	0	912	0	638	0	726	59	583
chr7.146698610.C.A	na	na	NoRepeat	0	909	0	538	72	789	87	599
chr20.59397989.G.T	na	na	chr20_59397839_59397992	0	477	186	553	149	395	169	471
chr3.155814867.G.A	na	na	NoRepeat	0	636	3	405	47	575	50	621
chr7.26695416.C.T	na	na	V$OCT1_03	0	926	6	903	250	1548	202	1903
chr11.23161255.A.G	na	na	NoRepeat	0	743	0	536	0	592	46	512
chr13.94726247.A.G	na	na	NoRepeat	0	997	0	767	1	920	119	844
chr10.61104785.G.A	na	na	NoRepeat	0	795	223	464	165	416	189	450
chr4.76841504.G.T	na	na	NoRepeat	1	786	0	900	2	747	65	659
chr2.154849557.A.T	na	na	NoRepeat	0	2103	1	1234	0	1570	183	1384
chr18.9022976.G.A	na	na	NoRepeat	1	632	0	601	0	533	86	523
chr8.73699374.A.G	na	na	NoRepeat	0	762	1	1135	94	1162	64	980
chr6.23565073.C.T	na	na	NoRepeat	2	949	411	791	513	927	478	803
chr16.10397038.G.A	na	na	NoRepeat	1	1106	0	1392	0	935	101	899
chr9.38757785.G.A	na	na	NoRepeat	0	806	0	572	0	521	84	551
chr13.100207582.G.A	na	na	NoRepeat	0	792	0	444	2	483	64	562
chr3.151843838.A.T	na	na	NoRepeat	0	907	0	738	0	1015	114	1093
chrX.124577291.A.G	na	na	NoRepeat	0	794	0	600	0	811	154	603
chr5.103152926.C.A	na	na	NoRepeat	0	398	0	434	45	491	31	484
chr8.114750017.T.C	na	na	NoRepeat	1	1487	798	1780	1056	2049	575	1492
chr1.7137045.T.A	na	na	chr1_7136861_7137276	0	1750	0	1745	1	1437	177	1845
chr13.27568945.C.G	na	na	NoRepeat	0	569	0	546	0	237	50	534
chr7.63610211.A.G	na	na	NoRepeat	2	1528	4	1304	163	1443	153	1337
chr11.39826395.C.A	na	na	NoRepeat	0	1061	0	693	0	868	94	936
chr12.86715039.A.G	na	na	NoRepeat	0	990	0	440	0	604	65	627
chr7.53488405.G.A	na	na	NoRepeat	0	482	0	474	0	434	43	476
chr9.74094641.A.T	na	na	NoRepeat	0	548	0	453	0	517	80	408
chr2.193281156.G.T	na	na	NoRepeat	2	1013	2	577	0	702	126	638
chr2.213514199.T.A	na	na	NoRepeat	0	680	0	478	0	647	60	516
chr8.136362353.G.A	na	na	NoRepeat	2	1342	527	2304	306	1676	428	1561
chr9.115928880.C.A	na	na	NoRepeat	0	934	0	816	0	703	130	805
chr10.106316229.C.T	na	na	NoRepeat	1	926	0	726	1	513	109	819
chr21.25813902.A.G	na	na	NoRepeat	0	1081	0	1029	0	1079	92	882
chr18.41824311.G.A	na	na	NoRepeat	0	948	209	662	176	609	178	542
chr2.124873993.T.C	na	na	NoRepeat	0	1130	0	1026	1	1117	114	808
chr7.147098063.G.A	na	na	NoRepeat	0	2934	519	2618	120	1449	507	2894
chr1.82085811.T.A	na	na	NoRepeat	0	893	0	1009	0	882	87	934
chr15.98432550.T.A	na	na	NoRepeat	0	1039	0	1040	0	981	98	1242
chr18.43647976.G.A	na	na	NoRepeat	0	547	0	461	1	430	75	373
chr9.121085191.A.T	na	na	V$FOXO4_02	1	2211	1187	1906	402	801	985	2017
chr6.124709426.C.A	na	na	NoRepeat	0	870	1	621	0	649	90	564
chr9.113795411.T.A	na	na	chr9_113795253_113795420	0	1835	0	1532	0	1032	151	1543
chr11.32342505.A.G	na	na	NoRepeat	0	990	0	870	0	568	130	1054
chr7.39005448.C.A	na	na	NoRepeat	0	975	26	931	501	1249	519	1454
chr7.126712784.A.G	na	na	NoRepeat	2	909	12	922	215	885	122	695
chr11.83265608.G.A	na	na	NoRepeat	1	945	0	843	2	976	98	766
chr10.31867242.A.G	na	na	NoRepeat	0	915	0	509	0	512	93	610
chrX.98164235.T.C	na	na	NoRepeat	0	591	154	286	311	553	179	357
chr13.35272297.T.A	na	na	NoRepeat	0	1106	0	867	0	942	125	994
chr4.32069017.C.G	na	na	NoRepeat	0	1234	3	1050	0	1113	106	1127
chr3.105575997.T.C	na	na	NoRepeat	1	1824	0	1510	0	637	256	1571
chr3.166504900.C.A	na	na	NoRepeat	1	1460	0	948	1	1619	111	1461
chr13.95550776.G.T	na	na	NoRepeat	0	599	2	466	55	428	65	452
chr5.85353799.A.G	na	na	NoRepeat	0	730	223	580	295	800	332	872
chr11.55552629.A.T	na	na	NoRepeat	0	2212	2	2445	0	1041	252	1919
chr1.165170417.T.A	na	na	NoRepeat	0	549	0	541	6	434	79	496
chr5.31179872.T.A	na	na	NoRepeat	1	727	1	672	0	788	70	812
chr11.56173048.A.C	na	na	NoRepeat	0	302	0	223	30	233	40	203
chr14.85431493.A.G	na	na	NoRepeat	0	664	0	690	0	626	57	650
chr8.111505982.A.T	na	na	NoRepeat	0	1211	0	1520	0	1870	118	1275
chrX.56004500.A.C	na	na	NoRepeat	7	946	500	754	682	983	631	907
chr2.76958598.C.A	na	na	NoRepeat	0	884	7	594	72	835	86	701
chr1.107947689.C.T	na	na	NoRepeat	0	1203	0	1518	0	1436	87	1439
chr5.99611421.G.T	na	na	NoRepeat	2	1053	7	774	88	1017	104	1007
chr15.86583910.C.T	na	na	NoRepeat	0	406	1	459	38	416	45	468
chr2.4487617.A.G	na	na	NoRepeat	0	765	180	706	374	978	313	769
chr1.162295533.T.C	na	na	NoRepeat	1	1081	0	1161	0	1101	131	998
chr3.34853455.G.T	na	na	NoRepeat	0	876	1	566	0	736	89	719
chr3.147929709.G.A	na	na	NoRepeat	0	917	0	645	0	1002	92	805
chr7.57501684.T.C	na	na	NoRepeat	0	381	0	278	0	319	28	373
chr2.82643392.G.C	na	na	NoRepeat	0	715	145	457	291	651	291	638
chr3.65510742.C.A	na	na	NoRepeat	1	1616	1	921	1	1090	121	1072
chr12.73540689.C.T	na	na	NoRepeat	0	1611	0	1441	0	671	136	1367
chr1.207780893.T.C	na	na	NoRepeat	1	1124	0	853	0	1133	109	871
chr12.121077824.G.A	na	na	NoRepeat	0	403	0	367	0	272	41	380
chr2.228122121.C.A	na	na	NoRepeat	0	879	1	793	0	726	88	691
chr7.138265623.C.G	na	na	NoRepeat	0	839	1	813	69	812	100	684
chr15.41214565.C.T	na	na	V$HNF1_C	2	1610	989	2554	277	671	243	1391
chr9.119785273.G.C	na	na	NoRepeat	0	1154	0	1052	0	889	126	974
chr17.48945157.G.A	na	na	NoRepeat	1	368	51	297	76	224	100	280
chr14.40338654.A.G	na	na	NoRepeat	2	1160	15	1523	232	1662	251	1286
chr7.71376883.C.A	na	na	NoRepeat	0	906	4	875	69	727	92	737
chr21.32896832.G.C	na	na	NoRepeat	0	772	4	1018	73	798	74	812
chr2.204939675.T.C	na	na	NoRepeat	0	733	0	680	0	653	171	659
chr2.59596739.T.C	na	na	chr2_59596559_59596741	0	1411	199	864	188	1286	94	1081
chr16.63771528.T.C	na	na	NoRepeat	0	974	0	1013	0	825	94	879
chr3.41368979.C.A	na	na	NoRepeat	1	1330	0	1064	0	889	136	1000
chr1.74610866.C.A	na	na	NoRepeat	0	700	116	553	163	638	195	630
chr12.72960904.C.G	na	na	NoRepeat	0	2038	0	1716	163	669	329	1623
chr1.164443858.C.T	na	na	NoRepeat	0	1034	0	1056	1	1146	148	1069
chr9.121493094.C.A	na	na	NoRepeat	1	872	1	715	1	704	86	689
chr20.56911749.T.A	na	na	NoRepeat	0	488	5	810	55	554	220	634
chr4.143601299.C.A	na	na	chr4_143601281_143601436	0	1953	0	2176	1	954	233	1866
chr4.86006091.T.A	na	na	NoRepeat	0	912	1	841	0	904	112	727
chr6.100414206.A.G	na	na	NoRepeat	0	1367	284	616	335	799	366	743
chr14.85648989.C.T	na	na	chr14_85648620_85649000	0	536	0	554	0	572	42	502
chr3.9464036.A.G	na	na	NoRepeat	0	673	0	481	0	658	90	628
chr2.152239212.C.G	na	na	NoRepeat	0	438	0	502	0	426	138	459
chr8.65050653.A.C	na	na	NoRepeat	0	1864	16	2231	314	2262	151	1899
chr7.67064550.G.A	na	na	chr7_67064511_67064865	0	1977	15	2466	169	923	484	2153
chr4.156679099.G.A	na	na	NoRepeat	0	126	7	90	0	96	0	112
chr3.182869890.G.A	na	na	NoRepeat	0	840	1	1068	0	774	107	660
chr9.73789741.A.T	na	na	NoRepeat	1	1430	0	1045	0	928	147	948
chr14.33945700.T.C	na	na	chr14_33945309_33945746	1	2257	0	2148	1	2586	218	2877
chr7.31275174.G.A	na	na	chr7_31274888_31275336	1	527	293	531	578	781	828	1024
chr11.21247253.C.A	na	na	NoRepeat	0	817	0	429	0	484	62	589
chr16.67195936.T.A	na	na	NoRepeat	1	228	4	262	33	187	62	231
chr12.28758152.C.A	na	na	NoRepeat	0	1807	0	1015	0	1419	173	1708
chr10.10667188.C.T	na	na	NoRepeat	0	1432	1	765	0	822	124	799
chr8.27110855.T.C	na	na	NoRepeat	0	785	0	749	0	621	66	557
chr6.11713731.G.A	na	na	NoRepeat	1	1691	0	1469	1	1534	74	1427
chr10.9742285.T.C	na	na	NoRepeat	0	1258	4	636	109	872	108	771
chr8.100669626.T.C	na	na	NoRepeat	1	747	0	1071	0	944	82	824
chr19.23700569.G.C	na	na	NoRepeat	0	694	412	810	307	671	337	647
chr9.77632883.C.A	na	na	NoRepeat	0	1503	0	1285	0	445	174	1230
chr13.88153421.T.A	na	na	NoRepeat	0	710	0	513	0	651	55	485
chrX.35043605.T.A	na	na	NoRepeat	0	505	0	423	1	351	85	360
chr3.108018423.G.A	na	na	NoRepeat	0	1539	0	911	0	843	114	938
chr1.17448730.C.A	na	na	NoRepeat	0	524	0	629	0	435	143	590
chr8.145063087.G.A	na	na	NoRepeat	0	261	160	355	166	302	47	222
chr2.141461109.A.C	na	na	NoRepeat	0	705	0	548	0	646	25	568
chr3.108719055.G.T	na	na	NoRepeat	2	2950	0	1546	0	1652	238	1746
chrX.146632590.T.G	na	na	NoRepeat	0	875	0	560	0	725	148	566
chr15.57777693.T.G	na	na	NoRepeat	0	1102	0	1506	0	1151	106	985
chr1.208159604.G.A	na	na	NoRepeat	0	1563	0	1091	0	1144	162	1027
chr9.112132031.C.A	na	na	NoRepeat	0	1855	5	1423	0	682	565	2023
chr22.16141370.C.T	na	na	NoRepeat	0	579	0	508	46	654	70	752
chr18.44494763.C.T	na	na	NoRepeat	0	801	0	356	1	421	56	392
chr7.126314010.G.T	na	na	chr7_126313865_126314116	3	1769	613	1560	219	638	212	1349
chr7.42905919.G.C	na	na	NoRepeat	0	667	0	505	0	663	138	859
chr12.107876050.T.C	na	na	NoRepeat	1	1137	0	838	0	792	105	875
chr13.60267134.G.T	na	na	chr13_60266904_60267153	0	1350	0	707	1	908	102	851
chr1.234115339.G.T	na	na	NoRepeat	0	1513	0	1022	0	654	163	855
chr2.37353391.G.A	na	na	NoRepeat	0	2185	7	2084	123	2392	193	2975
chr5.30478610.C.A	na	na	NoRepeat	0	1001	2	1038	0	948	105	883
chr4.23579295.T.A	na	na	chr4_23579007_23579408	1	1250	0	1119	1	1215	75	1021
chr15.89953958.C.G	na	na	NoRepeat	1	353	0	414	0	291	42	397
chr5.5014077.T.A	na	na	NoRepeat	0	688	0	714	0	764	66	732
chr4.130283596.A.T	na	na	NoRepeat	0	752	0	775	0	771	53	501
chr18.59682086.C.A	na	na	NoRepeat	0	1474	0	1110	1	969	134	839
chr7.136983681.G.C	na	na	NoRepeat	0	1247	0	1165	1	1253	115	1203
chr12.128616508.T.C	na	na	NoRepeat	0	747	0	594	1	539	71	543
chr4.19799001.A.G	na	na	NoRepeat	0	925	0	1006	0	898	81	743
chr3.151956738.C.G	na	na	NoRepeat	0	508	0	392	0	616	55	516
chr13.34959751.G.A	na	na	NoRepeat	1	1524	486	963	467	937	619	1070
chr2.73929338.G.A	na	na	NoRepeat	0	252	0	271	0	234	39	264
chr10.45625751.T.A	na	na	chr10_45625650_45625908	0	1128	0	726	0	818	131	822
chr12.74727723.T.C	na	na	NoRepeat	0	874	0	620	0	862	93	678
chr9.17934110.T.A	na	na	NoRepeat	2	2530	0	2267	0	1796	400	1980
chr1.177871951.G.A	na	na	chr1_177871748_177872059	0	2228	0	1858	0	946	245	2273
chr15.26806514.G.T	na	na	NoRepeat	0	596	4	751	34	439	5	579
chr7.115339062.T.G	na	na	NoRepeat	1	1127	0	774	1	836	109	828
chr11.131404550.G.A	na	na	NoRepeat	0	1136	0	1054	0	1003	114	1189
chr16.25772560.C.T	na	na	NoRepeat	2	1327	777	1355	156	353	659	1246
chr11.14950520.G.A	na	na	NoRepeat	0	889	0	1013	0	894	90	774
chr8.140151005.C.T	na	na	NoRepeat	1	648	0	932	0	879	75	796
chr14.80100818.C.A	na	na	NoRepeat	0	1185	4	943	75	964	103	1009
chrX.29786035.C.T	na	na	NoRepeat	0	610	158	337	170	383	200	370
chr4.126924392.C.A	na	na	NoRepeat	0	670	0	466	0	694	58	500
chr4.28513634.G.T	na	na	NoRepeat	0	728	0	534	0	596	78	473
chr7.144226817.A.G	na	na	chr7_144226394_144226959	1	869	0	840	0	822	36	649
chr12.16340945.T.A	na	na	chr12_16340568_16340984	1	1255	0	860	1	827	119	900
chr2.239235798.C.T	na	na	NoRepeat	0	211	0	238	20	169	26	197
chr1.58107492.C.A	na	na	NoRepeat	2	1757	2	1131	118	1010	143	1419
chr2.225648825.C.A	na	na	NoRepeat	2	1124	0	988	0	889	108	906
chr4.130035737.A.G	na	na	NoRepeat	0	1823	0	1983	2	729	199	1498
chr5.81126526.T.G	na	na	chr5_81126322_81126757	0	575	1	583	0	594	45	602
chr4.44918984.G.C	na	na	NoRepeat	0	964	178	875	360	1097	286	787
chr6.89532391.G.A	na	na	NoRepeat	0	921	1	574	0	710	31	666
chr22.19358731.C.T	na	na	NoRepeat	0	930	0	606	1	715	130	959
chr5.165402259.G.T	na	na	NoRepeat	1	946	0	606	2	567	105	682
chr19.30473343.C.T	na	na	NoRepeat	0	1010	0	612	74	708	0	564
chr4.91479610.T.C	na	na	NoRepeat	2	2267	659	1763	223	988	492	2102
chr17.16380774.C.T	na	na	NoRepeat	0	184	47	236	48	239	55	324
chr3.77486462.A.T	na	na	NoRepeat	0	1168	0	651	0	768	75	691
chr4.181096469.C.T	na	na	NoRepeat	0	948	5	699	124	971	91	582
chr16.60997895.T.A	na	na	NoRepeat	0	992	0	1062	0	895	96	834
chr8.10213826.C.A	na	na	NoRepeat	1	1590	436	1287	131	1150	577	1319
chr3.36878948.C.G	na	na	NoRepeat	2	1840	0	1453	0	529	232	1706
chr4.31761373.T.C	na	na	NoRepeat	0	2080	1	1946	159	1009	168	1780
chr1.164793735.G.C	na	na	NoRepeat	0	2196	6	1972	166	1930	0	2012
chr2.136149697.A.G	na	na	NoRepeat	0	743	0	683	0	661	161	632
chr11.104096920.A.G	na	na	NoRepeat	0	1402	0	910	0	1166	136	994
chr11.46397319.G.A	na	na	NoRepeat	0	132	0	115	5	72	11	127
chr2.100801442.G.C	na	na	NoRepeat	0	632	0	699	0	513	118	787
chr5.114047013.T.C	na	na	NoRepeat	0	750	0	591	0	614	69	601
chr1.191315981.T.C	na	na	NoRepeat	1	667	238	467	416	722	295	553
chr12.7341276.C.T	na	na	NoRepeat	0	150	1	147	42	188	50	199
chr1.241052191.C.A	na	na	NoRepeat	1	1197	0	791	1	771	122	810
chr9.13946357.C.T	na	na	NoRepeat	0	1077	2	1195	0	1033	159	1146
chr2.22797990.T.C	na	na	NoRepeat	0	1182	0	1000	1	1567	97	1245
chr5.73058403.G.T	na	na	NoRepeat	0	864	0	849	0	915	105	966
chr12.6989339.C.T	na	na	NoRepeat	0	641	2	885	126	579	161	700
chr3.97311771.G.A	na	na	NoRepeat	0	1451	0	1036	0	478	156	1190
chr12.128241998.A.C	na	na	NoRepeat	2	1746	0	1553	0	960	108	994
chr17.52555110.C.T	na	na	NoRepeat	1	762	88	696	103	277	326	708
chr3.118122872.A.C	na	na	NoRepeat	0	1414	0	881	0	1004	106	823
chr5.39494677.T.C	na	na	NoRepeat	0	456	4	407	48	425	40	579
chr20.24552976.C.A	na	na	NoRepeat	0	372	0	287	0	267	37	273
chr15.91694067.G.T	na	na	NoRepeat	0	651	115	591	216	479	241	580
chr8.76045446.T.A	na	na	NoRepeat	0	885	0	1114	0	1207	98	1100
chr1.46127783.G.A	na	na	NoRepeat	0	821	1	818	68	735	81	788
chr8.137028315.G.T	na	na	NoRepeat	1	943	258	1447	238	1232	280	1035
chr8.135969140.G.C	na	na	NoRepeat	0	632	0	1301	0	972	67	829
chr3.175866381.A.T	na	na	NoRepeat	0	424	0	375	31	515	50	415
chr2.232073441.G.A	na	na	NoRepeat	0	854	0	852	0	680	107	751
chr11.87340253.G.T	na	na	NoRepeat	0	958	11	784	100	869	101	741
chr5.25525345.A.T	na	na	NoRepeat	0	470	0	437	0	538	40	409
chr11.117349659.C.G	na	na	NoRepeat	0	1278	0	1168	0	299	122	1519
chr5.102131636.C.T	na	na	NoRepeat	0	1357	0	1120	0	1212	120	1188
chr11.31309684.T.G	na	na	NoRepeat	0	728	3	563	135	567	339	774
chr4.85321250.G.T	na	na	NoRepeat	0	3736	1	3547	0	2108	381	3332
chr6.106894803.T.A	na	na	NoRepeat	0	1042	0	701	1	657	34	687
chr7.14537063.T.C	na	na	NoRepeat	2	1223	579	927	1494	1963	1482	1839
chr4.23698552.G.C	na	na	NoRepeat	0	2144	433	2177	213	791	768	2305
chr17.18900137.C.T	na	na	NoRepeat	0	334	94	457	52	365	120	527
chr17.11363070.C.T	na	na	NoRepeat	0	1021	339	1340	320	1366	395	1656
chr4.37819528.T.C	na	na	NoRepeat	0	1230	0	1375	0	1033	132	1051
chr2.29494244.T.C	na	na	chr2_29494035_29494361	1	455	0	696	58	646	1	672
chr2.227168147.T.A	na	na	NoRepeat	2	830	4	878	73	687	186	612
chr7.144872841.T.A	na	na	NoRepeat	0	1372	348	1420	168	854	316	1160
chr1.44623869.G.T	na	na	NoRepeat	1	991	2	998	1	858	81	900
chr3.117090240.C.A	na	na	V$MEIS1BHOXA9_02	0	647	0	380	0	383	49	399
chr15.36345724.G.T	na	na	NoRepeat	1	1215	404	1407	196	1112	295	831
chr22.48836594.A.T	na	na	NoRepeat	0	311	0	370	0	306	25	476
chr20.14131544.G.A	na	na	NoRepeat	0	717	0	457	0	573	64	517
chr1.72300548.G.A	na	na	NoRepeat	0	834	277	693	225	773	246	713
chr11.38989347.G.A	na	na	NoRepeat	0	1584	596	1330	196	535	701	1552
chr8.39172067.C.G	na	na	NoRepeat	1	890	249	940	23	253	191	888
chr4.70497850.A.T	na	na	NoRepeat	0	667	2	493	73	725	1	548
chr10.59496519.G.T	na	na	NoRepeat	0	872	0	548	0	595	67	456
chr13.53985235.T.A	na	na	NoRepeat	0	1962	663	1360	278	572	766	1485
chr5.73525033.C.T	na	na	NoRepeat	0	809	1	942	0	777	106	983
chr3.108983191.A.T	na	na	NoRepeat	0	2141	0	1692	0	637	189	1607
chr16.64599208.G.A	na	na	NoRepeat	0	2007	0	1862	1	1411	115	1506
chr10.72919155.G.T	na	na	NoRepeat	0	785	1	665	0	554	122	554
chr10.108557018.C.T	na	na	NoRepeat	0	822	0	636	2	639	115	756
chr1.82949340.C.T	na	na	NoRepeat	0	929	0	832	0	831	75	820
chr1.235796623.A.G	na	na	NoRepeat	0	555	231	513	118	327	161	355
chr6.140877905.G.A	na	na	NoRepeat	0	876	0	603	58	668	0	638
chr11.25726324.C.A	na	na	NoRepeat	1	1874	802	2140	283	899	1115	2254
chr17.13285648.C.T	na	na	NoRepeat	0	917	197	1123	186	1209	236	1528
chr16.47862490.G.T	na	na	NoRepeat	1	2063	644	1791	274	949	753	2213
chr9.4797802.G.T	na	na	NoRepeat	0	1013	1	596	1	587	80	863
chr22.47910717.G.T	na	na	NoRepeat	1	2448	335	2786	321	1285	866	3640
chr19.32148730.G.C	na	na	NoRepeat	2	1094	427	791	324	718	318	662
chr13.62045325.A.T	na	na	NoRepeat	1	968	0	584	0	881	125	720
chr16.52572908.C.T	na	na	NoRepeat	0	1007	0	869	0	850	75	862
chr2.124334734.A.T	na	na	NoRepeat	0	1204	0	849	1	1135	118	742
chr14.65476738.G.T	na	na	V$ISRE_01	1	1293	2	1812	0	1111	297	1357
chr7.104503827.C.A	na	na	NoRepeat	1	921	0	882	0	880	93	827
chr15.97690274.G.T	na	na	chr15_97690088_97691292	1	950	3	971	156	527	299	1150
chr14.43412830.T.C	na	na	NoRepeat	0	569	173	510	150	737	159	505
chr10.109241402.A.C	na	na	NoRepeat	0	2038	0	1429	0	1358	208	1657
chrX.114766058.A.T	na	na	NoRepeat	0	935	468	848	522	864	403	766
chr4.61955597.T.A	na	na	NoRepeat	0	1709	2	1645	153	1528	156	1352
chr4.143191147.G.T	na	na	NoRepeat	0	1255	7	916	106	1049	0	893
chr5.27927736.C.A	na	na	NoRepeat	0	945	2	632	167	906	157	812
chr20.35094194.C.G	na	na	NoRepeat	0	1558	0	2113	0	1183	155	1729
chr14.83445741.T.A	na	na	NoRepeat	0	627	0	570	0	585	45	573
chr15.64173286.A.G	na	na	NoRepeat	0	849	309	1110	98	632	171	711
chr1.14966832.G.A	na	na	NoRepeat	0	914	0	1454	0	909	111	968
chr9.81630299.C.T	na	na	NoRepeat	1	578	0	448	0	500	93	447
chr12.40992795.C.T	na	na	NoRepeat	0	1166	7	842	102	906	102	756
chr10.1682506.A.G	na	na	NoRepeat	2	1073	454	835	307	725	350	740
chr10.1226739.A.C	na	na	NoRepeat	0	438	0	360	0	254	32	238
chr9.99007562.G.A	na	na	NoRepeat	0	389	0	345	0	306	18	343
chr2.29273629.G.A	na	na	NoRepeat	0	196	5	255	48	254	91	334
chr4.63080637.A.T	na	na	NoRepeat	0	776	186	641	249	835	143	658
chr22.23497828.C.T	na	na	NoRepeat	0	281	0	355	0	439	30	428
chr2.218544976.T.A	na	na	NoRepeat	0	1622	3	1266	123	1274	0	1275
chr12.65538951.G.T	na	na	NoRepeat	0	1435	1	966	2	1026	159	1089
chr4.67520021.C.T	na	na	NoRepeat	0	1433	271	1210	131	539	291	1194
chr3.70923041.G.T	na	na	NoRepeat	0	385	1	254	29	288	53	302
chr7.56752991.T.C	na	na	NoRepeat	0	2395	1687	2715	583	1021	1679	2731
chr6.78769679.C.A	na	na	NoRepeat	2	698	2	414	70	538	66	478
chr2.1411939.G.C	na	na	NoRepeat	0	208	1	294	21	371	65	326
chr14.88212604.C.T	na	na	chr14_88212401_88212597	2	1135	6	1251	84	1060	228	1059
chr8.57493359.G.A	na	na	NoRepeat	0	876	0	1306	0	1278	87	1111
chr5.152411116.C.T	na	na	NoRepeat	0	911	0	830	1	774	70	814
chr16.2964314.G.A	na	na	NoRepeat	0	456	1	392	0	311	53	339
chr4.60606209.G.A	na	na	NoRepeat	1	1804	0	2330	0	588	225	1561
chr16.35071565.T.C	na	na	NoRepeat	3	1523	289	1275	291	1454	321	1406
chr5.62375758.A.G	na	na	NoRepeat	0	1446	0	1645	0	1613	155	1659
chr4.43068877.G.A	na	na	NoRepeat	0	1642	358	1921	238	645	609	1767
chr4.174706825.T.G	na	na	NoRepeat	0	1315	0	936	184	1116	0	796
chr10.15132188.C.T	na	na	NoRepeat	1	553	1	360	26	354	30	407
chr4.130651328.A.C	na	na	NoRepeat	0	671	0	648	0	703	62	471
chr4.19490615.A.T	na	na	NoRepeat	0	1453	0	1358	0	1483	98	1239
chr7.121681436.T.A	na	na	NoRepeat	0	805	0	961	0	898	98	612
chr5.35124224.G.T	na	na	NoRepeat	0	1775	242	1989	197	687	758	2355
chr9.38210400.G.A	na	na	NoRepeat	0	1673	1035	1635	320	669	675	1369
chr13.56889888.T.C	na	na	NoRepeat	0	485	0	272	1	419	43	325
chr3.22813351.C.T	na	na	NoRepeat	0	389	45	279	0	294	0	288
chr3.86355309.A.T	na	na	NoRepeat	1	1345	0	641	0	900	94	770
chr8.14081355.A.T	na	na	NoRepeat	0	2361	688	1992	432	1003	298	2126
chr4.60693133.C.A	na	na	NoRepeat	1	1029	0	1119	0	1097	91	785
chr7.115368773.C.A	na	na	chr7_115368413_115369048	0	670	0	506	60	518	52	459
chr5.101378904.G.C	na	na	NoRepeat	0	1006	1	797	75	1056	69	924
chr6.3290576.T.C	na	na	NoRepeat	0	342	6	280	19	241	29	283
chr2.56174428.T.C	na	na	NoRepeat	0	715	17	515	146	813	71	584
chr6.156160489.G.T	na	na	NoRepeat	1	908	2	763	0	650	64	579
chr9.13774617.A.G	na	na	NoRepeat	0	934	8	1063	68	701	107	833
chr10.130677662.G.T	na	na	NoRepeat	0	884	0	672	0	612	88	778
chr2.6646679.T.A	na	na	V$P53_01	0	394	0	426	0	494	84	460
chr22.24231598.T.G	na	na	NoRepeat	0	242	0	233	0	257	48	292
chrX.71751090.A.C	na	na	NoRepeat	0	512	0	677	0	810	85	803
chr4.94580690.A.T	na	na	NoRepeat	0	1374	0	1395	0	796	142	1297
chr7.51918956.G.T	na	na	NoRepeat	1	1869	11	2289	162	1857	204	2003
chr10.58224173.G.C	na	na	NoRepeat	0	1367	0	820	2	936	126	762
chr16.86597911.G.T	na	na	NoRepeat	1	725	0	622	0	439	66	441
chr6.50217368.A.C	na	na	NoRepeat	0	612	0	585	0	833	62	736
chr15.91627021.G.A	na	na	NoRepeat	1	1449	499	1313	223	1502	331	1404
chr6.100591680.C.T	na	na	chr6_100591680_100591900	1	2645	7	2009	153	956	327	2193
chr1.18355169.C.T	na	na	NoRepeat	0	612	5	932	53	573	78	520
chr9.80593620.C.T	na	na	NoRepeat	0	629	0	441	0	434	67	438
chr5.169742885.G.A	na	na	NoRepeat	0	348	0	380	0	249	35	329
chr5.166947004.C.T	na	na	chr5_166946975_166947157	0	955	3	712	76	756	67	822
chr8.136142399.T.G	na	na	NoRepeat	0	686	0	1220	0	855	68	761
chr2.29971076.C.T	na	na	chr2_29971078_29971295	0	612	8	644	98	749	100	882
chr1.150268249.G.T	na	na	NoRepeat	2	997	0	1260	0	945	95	936
chr14.29898739.T.C	na	na	NoRepeat	1	1013	27	1130	441	1300	473	1420
chr11.32227967.T.A	na	na	chr11_32227791_32227964	0	2065	0	2333	1	1583	432	2732
chr3.80653691.A.T	na	na	NoRepeat	0	528	7	244	87	362	87	355
chr13.54291519.G.T	na	na	NoRepeat	0	1315	1	780	0	975	108	914
chr11.7037772.C.T	na	na	NoRepeat	0	73	5	42	0	47	0	40
chr4.113097838.A.G	na	na	NoRepeat	1	2035	711	2114	310	1088	463	1797
chr14.43252280.T.A	na	na	NoRepeat	1	610	214	680	212	888	197	639
chr4.117156067.C.A	na	na	NoRepeat	0	717	87	494	61	725	67	532
chr11.97732298.T.C	na	na	NoRepeat	0	1964	1	1723	0	841	205	1698
chr8.110406853.G.T	na	na	NoRepeat	0	464	345	657	351	682	216	566
chr4.120109489.T.A	na	na	NoRepeat	0	374	1	301	0	337	25	279
chr3.182089406.G.T	na	na	NoRepeat	0	1484	6	1250	98	1187	1	982
chr2.50612201.G.A	na	na	NoRepeat	0	833	1	442	66	804	70	658
chr5.119993647.A.G	na	na	NoRepeat	0	2212	0	1749	0	2012	191	1780
chr20.59537733.C.T	na	na	NoRepeat	0	347	0	442	0	329	41	314
chr12.15479226.C.A	na	na	NoRepeat	0	993	0	613	0	613	106	628
chr15.53089417.A.G	na	na	NoRepeat	0	840	365	1070	231	602	97	511
chr1.99580830.G.T	na	na	NoRepeat	0	1654	3	2028	192	2160	138	2039
chr4.163747959.G.A	na	na	NoRepeat	0	854	0	691	0	846	64	680
chr17.13288012.C.A	na	na	NoRepeat	0	1066	265	1294	219	1245	320	1705
chr3.46483952.G.A	na	na	NoRepeat	0	1366	0	1204	0	798	183	1219
chr4.36417410.C.T	na	na	NoRepeat	0	1116	4	958	75	927	80	851
chr13.93427192.A.G	na	na	NoRepeat	3	1767	0	1335	1	591	164	1380
chr15.60898307.T.C	na	na	chr15_60898301_60898457	0	454	6	670	47	517	12	474
chr18.76453145.C.A	na	na	NoRepeat	0	447	1	429	50	330	0	297
chr2.77301736.A.T	na	na	NoRepeat	0	741	0	476	72	771	78	612
chr4.157101388.A.T	na	na	NoRepeat	0	794	168	871	350	953	258	750
chr5.129146955.G.T	na	na	NoRepeat	0	982	0	975	1	1000	110	989
chr18.21150744.C.A	na	na	NoRepeat	0	536	0	439	0	354	67	401
chr4.179648833.C.A	na	na	NoRepeat	0	1267	0	1233	165	1445	118	834
chr1.26495200.G.C	na	na	chr1_26494878_26495192	0	1598	0	2059	0	508	210	1829
chr12.87901152.G.C	na	na	NoRepeat	1	1040	0	749	0	814	88	775
chr5.176277722.G.T	na	na	NoRepeat	0	945	0	1171	1	591	98	970
chr2.52163585.G.T	na	na	NoRepeat	0	522	1	413	34	602	56	462
chr11.18999337.C.A	na	na	NoRepeat	0	1306	7	897	94	886	126	876
chr7.88435226.G.C	na	na	NoRepeat	0	1769	0	1452	1	1620	139	1295
chr20.23478156.G.T	na	na	NoRepeat	0	1202	2	910	0	944	116	790
chr2.22923869.C.A	na	na	NoRepeat	0	861	1	742	53	1153	55	1110
chr1.73950242.A.T	na	na	NoRepeat	0	924	139	695	266	865	216	829
chr20.37780777.T.C	na	na	NoRepeat	0	536	245	716	86	430	210	563
chr4.96899257.A.T	na	na	NoRepeat	0	1468	598	1586	121	425	414	1391
chr6.64666757.G.T	na	na	NoRepeat	0	404	0	322	0	368	43	303
chr2.142375480.A.C	na	na	NoRepeat	0	1290	0	1083	0	783	157	928
chr7.123647575.C.T	na	na	NoRepeat	0	1212	0	936	0	880	115	827
chr7.11658616.A.G	na	na	NoRepeat	0	595	0	571	1	1152	51	1072
chr7.129951204.G.A	na	na	NoRepeat	0	209	0	229	0	165	19	134
chr3.21956968.T.G	na	na	NoRepeat	0	1016	0	653	0	869	113	758
chr2.194397016.A.G	na	na	NoRepeat	0	1037	0	769	0	943	145	1022
chr14.106355758.G.A	na	na	NoRepeat	0	184	0	227	0	145	25	232
chr2.153736980.A.T	na	na	NoRepeat	0	884	2	643	0	640	151	608
chr4.124628282.G.T	na	na	NoRepeat	1	1542	250	1026	465	1486	262	1129
chr1.70712986.A.G	na	na	NoRepeat	0	1113	0	994	0	1064	101	988
chr9.121314128.C.T	na	na	NoRepeat	0	2041	25	1615	319	1609	197	1424
chr2.18666894.G.C	na	na	NoRepeat	0	695	9	569	75	694	144	794
chr1.4760209.C.T	na	na	NoRepeat	0	437	0	419	0	317	62	375
chr10.83060786.A.T	na	na	NoRepeat	0	1073	0	608	0	777	33	549
chr4.7265163.C.A	na	na	NoRepeat	1	1041	293	1286	93	268	401	1026
chr2.134488253.G.A	na	na	NoRepeat	1	1984	0	1933	0	1093	222	1989
chr12.6635801.C.T	na	na	NoRepeat	0	408	4	461	45	268	79	394
chr3.187819528.G.A	na	na	NoRepeat	2	2422	2	2911	2	1984	280	2571
chr4.32373515.A.G	na	na	NoRepeat	0	512	0	471	0	512	42	428
chr14.33115547.A.G	na	na	NoRepeat	2	842	0	939	0	1291	78	1213
chr6.98006113.T.A	na	na	NoRepeat	1	754	2	471	55	552	74	511
chr2.29519953.G.T	na	na	chr2_29519749_29519946	3	2448	1010	2443	371	1414	804	2854
chr11.75147311.T.A	na	na	NoRepeat	0	130	0	134	17	104	11	120
chr10.83244378.C.A	na	na	V$MEF2_04	0	61	6	34	0	37	0	29
chr21.47124575.G.A	na	na	chr21_47124460_47124826	0	1134	0	1029	0	886	96	1070
chr2.117593861.G.A	na	na	NoRepeat	0	1242	0	862	0	999	89	900
chr5.114600394.G.A	na	na	chr5_114600311_114601096	1	515	113	482	82	323	136	441
chr7.1803750.T.A	na	na	NoRepeat	0	703	0	991	0	1263	170	1674
chr13.65747210.A.G	na	na	NoRepeat	0	834	2	564	79	650	90	580
chr11.70356628.C.G	na	na	NoRepeat	0	554	0	417	0	304	55	400
chr2.155389412.G.A	na	na	NoRepeat	0	985	0	629	0	832	86	778
chr4.85280370.C.A	na	na	NoRepeat	0	1450	1	1510	0	1681	178	1294
chr5.2432535.T.A	na	na	chr5_2432495_2432604	0	1143	4	942	103	999	0	1110
chr8.139269097.T.C	na	na	NoRepeat	0	1283	16	2612	253	1810	114	1505
chr15.23613514.A.G	na	na	chr15_23613399_23613640	0	508	212	391	91	263	92	317
chr16.33764280.T.G	na	na	NoRepeat	0	500	146	396	73	220	139	412
chr21.24415702.G.A	na	na	NoRepeat	0	763	4	831	81	891	61	730
chr8.5269631.T.G	na	na	NoRepeat	0	1762	2	1897	77	612	716	1829
chr8.41146682.C.A	na	na	NoRepeat	1	753	7	832	80	598	0	732
chr6.112858858.G.A	na	na	NoRepeat	0	828	0	460	88	548	87	564
chr6.145546239.C.A	na	na	NoRepeat	0	1057	0	696	0	582	82	648
chr21.41317113.G.A	na	na	NoRepeat	0	1596	1	1446	1	1270	94	1429
chr1.50554322.A.C	na	na	NoRepeat	0	711	0	677	0	612	77	692
chr18.39082698.G.C	na	na	NoRepeat	2	821	226	664	170	695	201	546
chr4.181891664.G.T	na	na	NoRepeat	0	828	1	720	0	766	65	505
chr5.27022119.G.T	na	na	NoRepeat	0	981	0	890	0	930	60	776
chr11.23883670.C.A	na	na	NoRepeat	0	989	0	740	0	742	95	776
chr1.160124823.T.C	na	na	NoRepeat	0	987	0	873	0	679	120	851
chr12.14011287.G.T	na	na	NoRepeat	1	1902	0	1314	145	1027	319	1104
chr8.769573.C.A	na	na	NoRepeat	0	765	3	590	54	647	0	544
chr7.38668883.G.T	na	na	NoRepeat	0	663	2	509	45	598	10	864
chr18.38027035.C.A	na	na	NoRepeat	1	1327	0	797	1	1037	119	708
chr9.78548788.A.T	na	na	NoRepeat	0	1934	0	1468	0	1356	197	1390
chr10.18426343.A.G	na	na	NoRepeat	0	1873	9	1243	115	415	445	1724
chr1.96039761.A.G	na	na	NoRepeat	0	902	0	938	0	1022	92	929
chrX.43595971.T.G	na	na	NoRepeat	0	457	0	486	0	543	69	631
chr7.155974185.C.T	na	na	NoRepeat	0	877	0	815	0	768	97	628
chr10.21298919.C.A	na	na	NoRepeat	0	1253	0	637	0	727	120	750
chr4.154523016.A.T	na	na	NoRepeat	0	1329	0	1562	0	1376	158	1413
chr7.110193759.T.A	na	na	NoRepeat	0	2461	0	2020	0	793	323	2176
chr4.153058943.C.A	na	na	NoRepeat	0	1382	0	1363	130	1333	0	1246
chr17.6118628.A.G	na	na	NoRepeat	0	901	11	861	66	633	210	805
chr1.204169775.T.C	na	na	NoRepeat	0	919	21	684	390	809	241	884
chr10.23565496.G.T	na	na	NoRepeat	0	801	0	433	1	461	73	524
chr3.80141436.T.A	na	na	NoRepeat	0	1493	543	1071	238	490	629	1267
chr11.120822838.T.C	na	na	NoRepeat	0	237	1	284	26	224	28	277
chr7.114685917.G.A	na	na	NoRepeat	2	2204	1	2186	102	1051	224	1939
chr8.142348862.G.T	na	na	NoRepeat	2	557	617	1107	278	502	181	569
chr4.29591505.G.A	na	na	NoRepeat	1	550	2	453	49	492	37	388
chr20.41571856.G.C	na	na	NoRepeat	0	932	361	1276	304	873	300	1161
chr2.162023058.G.T	na	na	NoRepeat	0	991	0	754	0	857	205	827
chr10.3457125.G.A	na	na	NoRepeat	0	381	106	219	80	180	95	198
chr10.31386130.C.T	na	na	NoRepeat	0	789	0	540	73	486	99	595
chr6.40477757.T.C	na	na	NoRepeat	2	1436	24	2792	350	2336	529	3242
chr10.30649930.C.A	na	na	NoRepeat	0	428	5	263	42	247	51	271
chr4.117353067.A.C	na	na	NoRepeat	0	673	6	761	73	829	59	517
chr7.143207008.C.G	na	na	NoRepeat	0	604	0	490	0	524	42	500
chr13.103733923.A.G	na	na	NoRepeat	0	911	0	762	0	773	102	699
chr4.167371806.C.A	na	na	NoRepeat	0	604	7	506	111	781	55	560
chr4.12721079.T.C	na	na	chr4_12721047_12721268	1	1777	0	1784	0	525	209	1650
chr10.48798235.G.A	na	na	NoRepeat	4	992	0	560	0	546	152	629
chr12.52139876.G.A	na	na	NoRepeat	3	1577	656	1298	638	1309	659	1265
chr14.83421361.A.T	na	na	NoRepeat	0	1121	1	1101	0	1097	100	1051
chr5.3916608.A.T	na	na	NoRepeat	0	648	13	553	47	634	61	600
chr6.93005920.T.C	na	na	NoRepeat	1	1549	4	874	134	1114	147	929
chr2.159417869.C.T	na	na	NoRepeat	2	2211	1	2002	1	976	478	1968
chr2.81082215.C.A	na	na	NoRepeat	0	873	2	540	87	838	49	717
chr3.70551030.T.C	na	na	NoRepeat	0	875	0	688	0	1037	111	754
chr4.177470970.G.T	na	na	NoRepeat	1	744	0	701	0	712	55	450
chr13.23042129.G.A	na	na	NoRepeat	0	772	0	595	0	646	85	620
chr1.215911251.C.T	na	na	NoRepeat	1	661	0	399	0	361	19	316
chr10.102971554.G.A	na	na	NoRepeat	0	619	1	478	0	302	61	349
chr4.91141573.T.C	na	na	NoRepeat	0	2174	30	1570	494	1927	410	1580
chr2.60043247.G.T	na	na	NoRepeat	1	1202	4	1150	112	1176	112	1201
chr3.180364767.G.C	na	na	NoRepeat	0	1247	2	1025	102	1003	0	972
chr5.163619598.T.G	na	na	NoRepeat	0	720	1	587	55	598	56	581
chr2.159049668.T.A	na	na	chr2_159049576_159049678	0	1907	0	1736	0	903	454	1952
chr11.132122397.G.T	na	na	NoRepeat	1	1379	1	1213	2	1055	154	1197
chr3.27890480.T.A	na	na	chr3_27890460_27890617	0	2908	0	2134	0	1052	403	2664
chr2.139679002.A.T	na	na	NoRepeat	2	670	234	486	332	597	312	557
chr18.6129061.G.A	na	na	NoRepeat	0	2245	1	1261	1	1253	183	1596
chr2.131003320.G.A	na	na	NoRepeat	0	585	2	511	0	514	64	454
chr3.136865403.G.T	na	na	NoRepeat	0	925	0	577	1	642	56	538
chr10.56338230.A.G	na	na	NoRepeat	0	1110	1	593	0	750	40	582
chr10.55189259.G.A	na	na	NoRepeat	0	793	0	349	1	551	84	430
chr3.167898798.C.T	na	na	NoRepeat	0	1264	0	743	0	1104	117	1065
chr5.143257379.G.A	na	na	NoRepeat	2	3076	1162	3182	463	1642	724	2707
chr4.62029798.C.T	na	na	NoRepeat	0	646	0	721	0	700	57	584
chr4.109283949.G.A	na	na	NoRepeat	0	762	1	729	64	637	0	638
chr21.10973015.C.T	na	na	NoRepeat	1	2493	513	2491	436	1777	891	2980
chr11.125018241.A.G	na	na	NoRepeat	0	1926	539	1673	249	892	456	2057
chr4.132295879.G.T	na	na	NoRepeat	0	1988	399	1739	191	687	361	1652
chr5.111304047.C.A	na	na	NoRepeat	0	843	0	739	0	753	79	739
chr14.74315103.C.T	na	na	NoRepeat	0	556	0	807	0	633	54	598
chr5.61732389.A.G	na	na	NoRepeat	0	712	0	788	0	744	86	843
chr1.154592071.C.A	na	na	NoRepeat	1	908	0	826	1	498	109	799
chr1.156429757.C.T	na	na	NoRepeat	1	1559	35	1368	317	1052	195	1145
chr11.74127159.G.A	na	na	NoRepeat	0	629	1	503	43	505	0	544
chr2.165586339.C.T	na	na	NoRepeat	0	1789	0	1699	0	583	396	1696
chr8.117541620.T.A	na	na	chr8_117541533_117541736	0	840	202	1135	216	1292	184	997
chr21.19777535.G.C	na	na	NoRepeat	0	708	0	473	54	568	60	534
chr13.90867899.G.A	na	na	chr13_90867808_90868139	0	625	1	439	0	494	59	474
chr8.65275630.G.C	na	na	NoRepeat	0	1689	4	2257	199	2380	180	1855
chr8.81085878.G.T	na	na	NoRepeat	1	559	0	808	0	755	72	685
chr17.66104698.A.T	na	na	NoRepeat	0	798	0	795	0	788	96	735
chr7.13078928.C.T	na	na	NoRepeat	2	895	3	920	1	1626	86	1732
chr7.80350959.T.C	na	na	NoRepeat	0	1262	221	946	221	1034	234	997
chr8.65580388.C.A	na	na	NoRepeat	0	1109	0	1434	0	1462	108	1265
chr3.141741382.A.C	na	na	NoRepeat	0	651	201	405	144	334	197	402
chr11.134455094.C.A	na	na	NoRepeat	0	797	1	616	0	585	161	760
chr3.59266028.T.A	na	na	NoRepeat	1	1097	0	823	0	786	121	852
chr18.6261019.G.T	na	na	NoRepeat	1	1893	10	1662	149	1551	213	1660
chr21.24643836.G.A	na	na	NoRepeat	0	735	0	553	0	678	65	573
chr4.81688965.T.C	na	na	NoRepeat	0	1470	5	942	111	1179	135	1037
chr7.97293865.A.G	na	na	chr7_97293791_97293966	0	2094	0	2201	0	1192	248	2036
chr3.180632421.C.T	na	na	NoRepeat	2	1778	631	1706	450	1583	406	1402
chr7.43786611.T.A	na	na	NoRepeat	0	1200	0	1098	1	980	117	1216
chr9.103402097.C.T	na	na	NoRepeat	0	1023	3	733	1	701	90	802
chr8.123760203.G.T	na	na	NoRepeat	0	1160	586	2455	360	1776	383	1428
chr2.154570362.C.A	na	na	NoRepeat	0	852	8	567	67	670	0	615
chr10.7178791.A.T	na	na	NoRepeat	0	1744	0	1337	1	1313	167	1329
chr2.18666967.G.T	na	na	NoRepeat	0	427	5	331	52	412	79	499
chr11.58453023.G.A	na	na	NoRepeat	2	1585	0	1200	2	1144	148	1132
chr8.3970181.C.A	na	na	NoRepeat	1	988	7	784	75	729	0	850
chr8.10778439.C.T	na	na	NoRepeat	0	1921	5	1904	45	447	224	2002
chr18.63637501.A.T	na	na	NoRepeat	0	1207	0	759	0	825	104	599
chr2.50200165.C.T	na	na	chr2_50199887_50200234	0	702	8	589	73	786	86	635
chr14.66385755.A.C	na	na	NoRepeat	0	1687	0	1921	0	1383	124	1398
chr10.9753985.C.T	na	na	NoRepeat	0	606	0	291	0	488	13	419
chr17.9336332.C.T	na	na	chr17_9336270_9336445	0	565	188	847	144	777	162	998
chr6.91784066.G.A	na	na	NoRepeat	0	872	3	587	83	592	87	648
chr16.61448026.G.A	na	na	NoRepeat	2	2110	742	1815	469	1511	349	1484
chr11.115910384.C.A	na	na	NoRepeat	0	1256	0	1008	2	1005	127	1011
chr20.12667058.T.G	na	na	NoRepeat	0	1379	0	1091	1	1124	124	870
chrX.23673390.C.T	na	na	NoRepeat	0	304	0	161	47	168	66	186
chr13.90270876.G.A	na	na	NoRepeat	0	730	0	461	1	626	69	566
chr3.191352075.A.G	na	na	NoRepeat	0	731	0	514	0	551	71	437
chr5.61122449.G.T	na	na	NoRepeat	0	768	0	737	1	746	101	880
chr16.61798638.C.A	na	na	NoRepeat	2	2256	0	1744	0	1689	164	1531
chr2.64525603.G.T	na	na	NoRepeat	0	770	0	761	0	782	121	635
chr15.62119458.T.A	na	na	NoRepeat	0	776	0	990	0	531	81	628
chrX.117419177.T.A	na	na	chrX_117419048_117419236	0	849	0	951	0	311	194	735
chr8.123911757.C.T	na	na	NoRepeat	0	1126	0	1794	0	1473	120	1301
chr2.195442251.C.A	na	na	NoRepeat	0	433	0	328	0	433	49	304
chr8.34535091.G.A	na	na	NoRepeat	0	1120	243	793	82	844	181	605
chrX.154445937.A.G	na	na	NoRepeat	1	569	0	395	0	437	80	396
chr9.594090.G.A	na	na	chr9_594078_594547	0	1426	1	1085	0	951	117	1095
chr4.23588600.T.A	na	na	NoRepeat	0	1102	0	1195	2	1256	94	972
chr12.72863154.A.G	na	na	NoRepeat	0	610	0	517	0	455	53	466
chr2.52553126.T.A	na	na	NoRepeat	0	800	1	533	59	792	76	701
chr4.82874872.G.T	na	na	NoRepeat	0	1387	346	1353	184	541	361	1277
chr16.11229418.G.A	na	na	NoRepeat	0	290	0	329	0	245	41	261
chr4.66974392.T.A	na	na	NoRepeat	0	1413	0	1307	0	1576	141	1153
chr3.173661244.C.A	na	na	NoRepeat	0	656	0	415	0	617	44	558
chr5.11999071.G.A	na	na	NoRepeat	2	1633	0	1683	2	1625	114	1597
chr16.54689963.C.A	na	na	NoRepeat	0	747	0	679	0	605	110	799
chr13.78779219.T.A	na	na	NoRepeat	0	172	38	78	46	114	58	124
chr7.110035431.G.A	na	na	NoRepeat	1	2078	696	1967	288	850	415	1808
chr3.158874660.A.T	na	na	NoRepeat	0	962	0	819	1	935	81	1084
chr17.26353650.A.C	na	na	NoRepeat	0	2482	0	2567	0	1026	338	2314
chr7.127176343.C.T	na	na	chr7_127175644_127176626	0	2633	0	2727	0	975	277	2040
chr13.42041315.A.T	na	na	NoRepeat	0	2058	1	1773	0	718	241	1918
chr18.41622267.G.T	na	na	chr18_41621956_41622310	0	677	0	419	0	440	66	392
chr18.33283199.T.A	na	na	NoRepeat	1	1379	1	852	0	859	137	753
chr2.196866071.C.T	na	na	NoRepeat	0	671	0	476	0	529	126	576
chr12.97666606.G.T	na	na	chr12_97666206_97666619	0	1334	0	998	0	535	131	1133
chr6.92157650.A.G	na	na	NoRepeat	0	1824	2	839	1	895	164	983
chr9.79814813.A.G	na	na	NoRepeat	0	1096	3	885	61	345	113	838
chr8.70280506.G.T	na	na	NoRepeat	0	912	0	983	1	1057	65	986
chr16.13256195.G.A	na	na	chr16_13256015_13256244	1	3179	0	2314	2	2021	328	2081
chr9.79967811.G.C	na	na	NoRepeat	0	1061	0	838	0	889	122	750
chr1.189736455.C.T	na	na	NoRepeat	0	977	0	611	0	1133	97	822
chr22.25783873.C.T	na	na	NoRepeat	0	286	0	440	0	403	38	481
chr9.137859532.C.T	na	na	NoRepeat	0	148	0	78	13	94	17	110
chr13.53898756.C.A	na	na	NoRepeat	1	2267	1	1508	0	731	229	2143
chr3.130135038.G.T	na	na	NoRepeat	1	1597	1	1191	0	1176	179	1145
chr8.131650975.G.T	na	na	NoRepeat	0	903	1	1305	0	1259	88	1178
chr4.72002029.A.T	na	na	NoRepeat	0	1269	345	1338	186	544	321	1310
chr3.148590271.C.A	na	na	NoRepeat	0	672	230	464	511	779	528	779
chr15.54613633.C.A	na	na	chr15_54613051_54613770	0	202	0	208	0	210	19	127
chr14.53399063.T.G	na	na	NoRepeat	0	1927	0	1976	0	1581	164	1861
chr10.55585176.C.G	na	na	NoRepeat	0	555	1	255	0	300	41	251
chr7.80522383.C.T	na	na	NoRepeat	0	927	0	657	63	761	0	664
chr18.4240278.A.T	na	na	NoRepeat	0	475	0	322	0	356	31	378
chrX.104049350.T.C	na	na	NoRepeat	0	450	10	483	123	495	101	368
chr13.107072285.A.G	na	na	NoRepeat	0	900	0	870	76	774	0	839
chr2.59778997.G.A	na	na	NoRepeat	1	799	10	613	228	878	191	736
chr3.157640581.G.A	na	na	NoRepeat	1	1367	2	1015	0	1356	91	1300
chr8.103313907.C.T	na	na	NoRepeat	0	737	0	640	0	934	62	739
chr17.74371768.G.C	na	na	NoRepeat	0	1336	1	1414	18	301	138	1493
chr1.216092939.G.C	na	na	NoRepeat	0	1334	143	738	103	648	129	663
chr3.154316003.T.A	na	na	NoRepeat	0	1998	0	1275	0	2223	205	2076
chr16.53797121.A.G	na	na	NoRepeat	0	1086	340	1203	135	607	288	1152
chr4.98145089.T.C	na	na	NoRepeat	0	1506	2	1067	96	1105	106	937
chr15.70761784.T.G	na	na	NoRepeat	1	768	2	731	0	592	68	734
chr12.44697498.C.G	na	na	NoRepeat	0	695	0	537	0	543	57	618
chr11.10570074.G.T	na	na	NoRepeat	1	681	0	421	0	433	61	508
chr1.216424476.G.A	na	na	V$MEF2_03	1	927	209	423	130	415	169	490
chr22.22727728.G.T	na	na	NoRepeat	1	1086	1	1093	2	1167	112	1524
chr9.9169367.C.A	na	na	NoRepeat	0	1971	0	1994	2	649	154	1562
chr4.24115000.A.C	na	na	NoRepeat	0	1440	9	1685	121	1407	154	1431
chr11.83332697.G.A	na	na	NoRepeat	0	1039	0	836	0	953	85	834
chr7.124502946.G.A	na	na	NoRepeat	1	1996	3	1900	1	974	219	1534
chr15.91993089.C.A	na	na	NoRepeat	0	1178	18	753	271	979	249	991
chr12.116302398.G.A	na	na	NoRepeat	0	917	1	818	0	769	118	852
chr4.138333905.T.C	na	na	NoRepeat	1	2313	10	2166	200	1086	221	2005
chr12.131072538.C.T	na	na	NoRepeat	0	503	0	414	0	382	42	420
chr8.115473455.A.T	na	na	NoRepeat	0	1040	0	1168	0	1680	80	1129
chr4.189734678.G.C	na	na	NoRepeat	0	864	0	836	0	720	58	511
chr9.125384919.G.T	na	na	NoRepeat	0	726	2	559	64	586	69	664
chr18.21087134.G.A	na	na	NoRepeat	0	759	8	442	61	447	85	489
chr1.98508091.T.C	na	na	NoRepeat	0	1069	0	811	0	1120	56	1046
chr7.6748079.G.A	na	na	NoRepeat	1	1021	0	1133	1	1993	156	2225
chr5.65451988.G.A	na	na	V$IRF2_01	0	729	1	612	0	761	80	781
chr18.68045781.G.C	na	na	NoRepeat	0	916	188	630	141	547	139	459
chr6.123031256.G.A	na	na	NoRepeat	0	876	5	773	77	588	82	585
chr6.125024335.C.T	na	na	chr6_125024242_125024355	0	2008	1	2224	0	785	188	1967
chr14.58359505.A.C	na	na	NoRepeat	1	925	0	972	0	832	72	781
chr10.52104244.G.A	na	na	NoRepeat	0	905	0	490	2	489	94	542
chr2.228589569.C.A	na	na	chr2_228589445_228589574	1	2083	0	2042	0	1012	413	1864
chr16.25122750.G.A	na	na	NoRepeat	0	369	0	421	0	299	46	341
chr2.32988806.T.G	na	na	NoRepeat	0	1957	0	2140	1	3802	381	3226
chr13.86480106.A.T	na	na	NoRepeat	1	868	0	457	0	579	66	622
chr17.8435091.C.A	na	na	NoRepeat	0	731	80	1211	96	1117	145	1482
chr4.65465594.T.A	na	na	NoRepeat	1	743	1	704	0	878	64	528
chr2.227644611.C.A	na	na	NoRepeat	0	1178	0	947	0	1021	129	942
chr14.51399576.G.A	na	na	NoRepeat	0	730	6	1018	57	735	111	897
chr13.67969812.A.T	na	na	NoRepeat	1	451	0	323	0	403	39	358
chr11.23611934.A.G	na	na	NoRepeat	2	1259	0	869	0	1104	88	811
chr1.222395806.A.T	na	na	NoRepeat	0	1488	0	1197	0	1131	160	1054
chr4.127810302.T.A	na	na	NoRepeat	0	847	0	651	0	754	74	632
chr3.102546373.T.C	na	na	NoRepeat	0	1569	5	949	139	1067	139	989
chr18.12486398.C.A	na	na	NoRepeat	0	762	0	485	0	572	58	598
chr13.115065511.G.A	na	na	NoRepeat	0	892	0	540	1	585	92	707
chr2.203948568.A.T	na	na	NoRepeat	0	862	0	671	0	804	137	777
chr17.61970131.A.G	na	na	NoRepeat	0	686	6	656	69	503	71	570
chr14.106664641.G.A	na	na	NoRepeat	0	1894	0	1548	0	1219	167	1619
chr2.13252110.A.G	na	na	NoRepeat	0	852	137	678	162	1051	106	934
chr8.112211755.A.G	na	na	NoRepeat	0	807	0	808	0	1098	59	776
chr6.4361670.C.A	na	na	NoRepeat	0	941	0	740	58	732	0	816
chr13.107840032.C.T	na	na	NoRepeat	0	639	2	386	62	441	64	463
chr6.62873521.C.T	na	na	NoRepeat	0	1021	1	829	1	777	73	615
chr2.215104619.T.A	na	na	NoRepeat	0	1033	483	868	235	414	569	1000
chr3.33957452.A.T	na	na	NoRepeat	0	810	0	683	0	500	104	627
chr5.144353307.A.G	na	na	NoRepeat	0	648	0	560	0	566	54	554
chr7.134345794.C.A	na	na	V$AP4_01	2	1849	1	1946	0	1148	219	1682
chr1.61452305.C.G	na	na	NoRepeat	0	838	0	968	1	667	104	867
chr6.64147245.C.T	na	na	NoRepeat	0	1837	0	1584	0	1065	149	1266
chr6.42379398.G.A	na	na	NoRepeat	0	202	50	421	40	389	55	582
chr3.36151651.A.T	na	na	NoRepeat	0	1124	0	761	2	903	89	858
chr3.34339878.G.T	na	na	NoRepeat	1	106	9	85	0	84	0	74
chr11.35313740.T.C	na	na	NoRepeat	0	1703	0	1603	1	1215	198	1629
chr17.14294387.A.G	na	na	NoRepeat	0	748	4	1299	79	1395	89	1552
chr4.174900642.C.T	na	na	NoRepeat	1	1171	1	963	118	1030	115	723
chr3.105540291.C.A	na	na	NoRepeat	0	1815	473	952	390	953	484	987
chr22.27006355.G.T	na	na	NoRepeat	0	1574	1	1689	0	1451	334	2126
chr11.55797198.C.A	na	na	NoRepeat	1	1215	4	751	102	743	103	659
chr12.46916381.G.A	na	na	NoRepeat	1	1003	1	773	1	810	93	828
chr8.12863648.C.T	na	na	NoRepeat	0	519	140	476	47	400	248	461
chr4.115785891.A.G	na	na	NoRepeat	0	1442	417	1723	146	494	405	1475
chr17.54604916.A.G	na	na	NoRepeat	0	985	412	920	103	717	132	764
chr13.94104273.G.A	na	na	NoRepeat	1	1631	4	986	145	1067	114	1010
chr4.36093296.G.T	na	na	NoRepeat	1	753	4	785	48	703	76	626
chr3.60546878.C.T	na	na	NoRepeat	0	356	4	299	31	358	51	313
chr10.113970689.G.C	na	na	NoRepeat	0	520	2	375	31	272	56	430
chr20.31379707.G.C	na	na	NoRepeat	0	1180	1	1380	0	892	87	997
chr8.18069378.G.T	na	na	NoRepeat	0	1224	0	1060	0	912	250	752
chr14.26921789.T.C	na	na	NoRepeat	1	588	11	604	231	865	220	853
chr18.49955031.C.T	na	na	chr18_49954861_49955065	0	1009	0	712	0	809	109	582
chr14.94776695.G.C	na	na	NoRepeat	0	423	164	466	109	354	130	401
chr9.37214247.A.T	na	na	chr9_37214093_37214309	0	614	0	682	0	550	63	490
chr11.7072228.G.A	na	na	NoRepeat	0	1321	0	838	0	948	97	900
chr14.33271474.T.C	na	na	NoRepeat	0	1134	434	1152	731	1511	729	1502
chr10.80897389.G.T	na	na	NoRepeat	0	432	0	362	0	270	67	293
chr9.85038239.G.T	na	na	NoRepeat	0	457	1	390	28	369	0	331
chr5.20902144.C.T	na	na	NoRepeat	0	1129	108	994	281	1037	287	1110
chr18.19859043.G.A	na	na	NoRepeat	0	750	0	496	0	530	80	550
chr2.13963729.T.A	na	na	NoRepeat	0	644	0	760	0	992	59	793
chr12.54249744.T.C	na	na	chr12_54249609_54249804	0	2358	2	2254	0	785	285	2120
chr4.28764376.G.T	na	na	chr4_28764192_28764488	2	2086	2	1992	0	943	170	1860
chr11.72031447.G.A	na	na	NoRepeat	0	1340	0	1315	1	1086	139	1106
chr4.178962152.T.A	na	na	NoRepeat	0	520	0	405	0	545	54	344
chr6.56630507.G.A	na	na	NoRepeat	0	782	409	1237	445	1428	463	1412
chr5.164009628.G.C	na	na	NoRepeat	0	909	0	449	0	511	74	426
chr17.53312389.A.G	na	na	NoRepeat	0	840	0	766	0	638	88	694
chrX.36212218.C.T	na	na	NoRepeat	0	302	4	185	26	203	37	198
chr4.136959918.C.T	na	na	NoRepeat	0	468	1	368	0	437	51	331
chr16.61191347.C.T	na	na	NoRepeat	0	1132	315	912	200	975	224	858
chr10.55861133.G.A	na	na	NoRepeat	0	1062	0	759	0	762	87	636
chr13.69423032.G.C	na	na	NoRepeat	0	1180	0	696	1	895	105	810
chr12.55458212.C.A	na	na	NoRepeat	0	940	0	869	76	796	0	851
chr3.66355493.T.C	na	na	NoRepeat	0	2498	1	1840	4	1140	345	2221
chrX.67465601.T.C	na	na	NoRepeat	1	454	414	560	409	620	602	762
chr18.3972143.A.G	na	na	NoRepeat	0	929	306	660	215	690	262	732
chr18.30841880.T.C	na	na	NoRepeat	0	988	1	542	89	605	24	417
chr15.27568250.G.A	na	na	NoRepeat	0	2120	1	2631	2	1015	296	1969
chr4.65194783.G.C	na	na	NoRepeat	0	725	0	562	0	750	53	543
chr12.81734635.T.C	na	na	NoRepeat	1	585	0	498	0	613	57	476
chr5.120725712.C.A	na	na	NoRepeat	0	680	0	552	2	614	63	520
chr8.115726350.T.A	na	na	NoRepeat	0	654	0	762	0	1012	59	753
chr18.41435133.T.C	na	na	NoRepeat	0	705	0	590	0	591	74	423
chr3.156017204.G.A	na	na	NoRepeat	0	537	0	401	0	644	61	668
chr5.91037120.C.A	na	na	chr5_91036835_91037190	0	1351	282	1164	351	1390	407	1437
chr1.61872748.C.A	na	na	NoRepeat	0	555	0	544	52	477	68	495
chr10.68071912.C.A	na	na	chr10_68071841_68071967	0	624	6	419	43	386	64	310
chr3.145495465.A.G	na	na	NoRepeat	1	1557	1	1099	0	1514	134	1118
chr1.97593846.T.C	na	na	V$MSX1_01	0	937	0	854	1	948	88	1001
chr13.69744682.G.T	na	na	NoRepeat	0	631	0	410	0	469	41	439
chr7.119350397.G.A	na	na	NoRepeat	0	1365	472	1403	195	795	381	1446
chr13.93455164.A.T	na	na	NoRepeat	0	770	1	378	0	516	54	502
chr13.93995512.G.A	na	na	chr13_93995381_93995778	0	2995	0	2111	1	1568	254	2468
chr1.106548414.C.T	na	na	NoRepeat	0	684	0	648	13	756	47	625
chr2.81521930.C.T	na	na	NoRepeat	0	1109	0	809	105	1251	70	984
chr6.70992274.G.A	na	na	CpG_COL9A1_0	0	284	0	305	0	259	27	259
chr10.131706367.T.A	na	na	chr10_131705778_131706785	0	1343	0	1084	0	467	145	1178
chr3.5122019.A.T	na	na	NoRepeat	1	549	0	374	0	419	67	463
chr8.143173122.G.A	na	na	NoRepeat	0	362	0	589	0	336	23	299
chr12.28503266.T.C	na	na	NoRepeat	1	1508	0	664	1	1043	113	1246
chr18.76308349.C.T	na	na	CpG_SALL3_431697	0	581	33	363	21	354	13	336
chr3.117288566.A.G	na	na	NoRepeat	1	2812	0	1481	0	1476	201	1454
chr4.24411736.T.C	na	na	NoRepeat	0	2626	611	3138	362	1109	931	2577
chr1.197525956.C.T	na	na	NoRepeat	0	2066	32	849	632	1438	556	1313
chr5.51680171.C.A	na	na	NoRepeat	0	984	185	914	263	1027	265	1014
chrX.128410901.A.C	na	na	chrX_128410360_128410896	0	1449	10	1114	134	749	329	1188
chr12.94031744.T.A	na	na	NoRepeat	0	1058	3	619	0	759	131	826
chr2.82643294.T.A	na	na	NoRepeat	1	859	149	557	321	785	318	702
chr10.87198132.G.T	na	na	NoRepeat	0	1078	0	788	0	631	81	567
chr1.111244187.G.A	na	na	NoRepeat	0	1433	13	1603	108	1594	163	1762
chr1.81232233.T.C	na	na	NoRepeat	0	1200	204	952	394	1247	298	1051
chr1.105211477.C.T	na	na	NoRepeat	1	914	5	913	98	1144	103	1101
chr3.2322427.T.A	na	na	NoRepeat	0	708	0	459	1	675	68	599
chr21.20351994.T.A	na	na	NoRepeat	0	1076	7	929	175	1032	189	999
chr8.65535284.G.A	na	na	NoRepeat	0	1060	5	1405	96	1382	98	1135
chr3.35456835.T.C	na	na	NoRepeat	0	1849	0	1224	0	887	152	1529
chr19.50791101.A.C	na	na	NoRepeat	1	765	0	654	0	459	70	540
chr12.22285024.C.A	na	na	NoRepeat	1	1207	1	720	1	659	128	697
chr1.96086969.G.A	na	na	NoRepeat	0	1308	561	1432	397	1227	477	1519
chr16.82531766.C.A	na	na	NoRepeat	0	443	0	202	0	192	12	202
chr10.36036583.G.A	na	na	NoRepeat	0	2312	0	1544	1	971	269	2578
chr1.26061214.G.A	na	na	NoRepeat	0	246	0	454	48	190	61	250
chrX.78342643.A.T	na	na	NoRepeat	0	635	0	508	0	538	114	553
chr17.35713281.C.T	na	na	NoRepeat	2	1066	6	964	113	783	137	862
chr9.4856774.G.T	na	na	NoRepeat	1	2147	0	1837	2	1547	169	2273
chr9.23353369.A.G	na	na	NoRepeat	0	1171	0	808	1	767	93	740
chr4.1564060.C.T	na	na	chr4_1563635_1564174	0	1063	302	1216	29	85	619	1277
chr13.86483013.A.G	na	na	NoRepeat	2	1267	0	610	87	862	116	857
chr4.130854666.T.A	na	na	NoRepeat	0	687	0	535	0	710	71	519
chr3.192452719.T.A	na	na	NoRepeat	0	1573	0	1044	0	1115	142	900
chr10.16042830.C.T	na	na	NoRepeat	1	787	138	413	209	593	209	460
chr2.77957520.G.T	na	na	NoRepeat	0	1026	1	709	0	1035	181	812
chr6.1167721.C.T	na	na	NoRepeat	0	684	5	560	54	510	0	495
chr12.52717084.G.C	na	na	NoRepeat	1	1687	838	1506	217	437	731	1347
chr1.98658768.C.T	na	na	NoRepeat	0	1348	392	1442	586	1507	594	1512
chr2.231147121.C.T	na	na	NoRepeat	0	569	0	449	1	482	65	410
chr2.66430713.C.A	na	na	NoRepeat	0	710	156	486	269	689	247	621
chr4.11352850.G.C	na	na	chr4_11352616_11352858	0	1346	0	1774	0	698	138	1402
chr21.18117716.T.G	na	na	NoRepeat	0	1192	0	1138	0	1269	121	1286
chr19.12293502.G.T	na	na	NoRepeat	2	1903	0	1673	0	861	249	2103
chr8.34587784.C.T	na	na	NoRepeat	0	847	129	666	162	750	70	555
chr8.111290177.T.A	na	na	NoRepeat	0	1076	0	1307	0	1561	101	1219
chr18.12127519.G.A	na	na	NoRepeat	1	748	0	415	2	481	62	498
chr2.49502982.G.T	na	na	NoRepeat	0	1071	1	963	4	1248	82	1062
chr1.18553719.C.T	na	na	NoRepeat	2	1494	4	2013	3	1157	132	1027
chr17.60386097.C.T	na	na	NoRepeat	0	813	0	780	1	685	87	656
chr15.53166546.C.T	na	na	NoRepeat	0	3056	1	2652	0	2110	112	1879
chr7.141797898.G.A	na	na	NoRepeat	0	1552	0	1709	0	644	232	1780
chr6.154900660.T.A	na	na	NoRepeat	0	1281	0	1199	1	1060	145	954
chr4.117725278.T.C	na	na	NoRepeat	0	436	0	270	0	401	32	263
chr1.239581913.C.T	na	na	NoRepeat	0	610	0	421	0	489	68	455
chr10.28395689.C.T	na	na	NoRepeat	0	2237	0	1658	0	952	243	2200
chr7.88285036.A.G	na	na	NoRepeat	1	1035	8	775	206	905	238	786
chr20.25667240.G.C	na	na	NoRepeat	0	500	0	271	17	276	17	296
chr11.69635629.A.T	na	na	NoRepeat	0	443	0	364	1	351	52	383
chr1.84208091.C.A	na	na	chr1_84208049_84208350	0	1411	1	1500	0	1128	158	1480
chr7.103990297.T.G	na	na	NoRepeat	0	940	0	895	0	1006	137	802
chr10.100648452.C.A	na	na	NoRepeat	0	1358	0	918	1	1038	126	775
chr4.32184614.C.T	na	na	NoRepeat	1	597	0	567	0	635	53	503
chr9.33193123.G.T	na	na	NoRepeat	3	1418	10	1624	130	975	189	1090
chr3.51392110.C.T	na	na	NoRepeat	0	1841	0	1659	0	436	234	1905
chr18.57186757.C.T	na	na	NoRepeat	0	393	39	322	34	324	18	292
chr13.20256551.T.C	na	na	NoRepeat	0	967	0	604	1	605	90	687
chr5.51794172.T.C	na	na	NoRepeat	0	496	6	514	51	605	53	659
chr12.79518892.C.T	na	na	NoRepeat	1	860	7	651	161	661	151	650
chr13.106158780.T.G	na	na	NoRepeat	1	774	1	535	1	544	93	613
chr7.117889693.C.A	na	na	NoRepeat	0	1186	0	1012	2	1090	139	849
chr13.65038842.C.T	na	na	NoRepeat	0	1303	1	1089	0	473	128	1147
chr6.48153949.C.T	na	na	NoRepeat	0	520	238	686	251	908	302	896
chr7.9080955.C.A	na	na	NoRepeat	0	1108	2	884	3	1960	147	1918
chr5.174096468.T.A	na	na	NoRepeat	1	1413	0	1431	1	997	113	1255
chr14.88632188.A.G	na	na	NoRepeat	0	165	62	170	38	140	39	151
chr8.85807102.G.C	na	na	NoRepeat	1	590	243	1098	186	916	167	794
chr14.45131199.G.A	na	na	NoRepeat	0	673	3	754	61	546	71	602
chr19.33305937.G.T	na	na	NoRepeat	1	917	0	915	0	621	90	647
chr4.124667420.G.T	na	na	NoRepeat	2	1770	0	1787	0	752	191	1694
chr17.26104044.C.A	na	na	NoRepeat	0	417	1	340	0	261	41	321
chr2.83009387.C.A	na	na	NoRepeat	0	618	0	465	0	646	84	566
chr4.101053301.G.T	na	na	NoRepeat	0	2270	437	2067	263	845	456	1952
chr19.7625672.G.T	na	na	chr19_7625502_7625699	0	1400	1	1662	0	673	184	1645
chr2.78308088.C.A	na	na	NoRepeat	1	1131	215	836	478	1077	385	835
chr16.933620.G.A	na	na	NoRepeat	2	674	0	753	0	544	97	484
chr21.24057635.T.A	na	na	NoRepeat	0	649	186	513	233	594	236	558
chr2.135536422.C.A	na	na	NoRepeat	0	1491	0	1338	0	1231	144	1333
chr10.1862638.C.A	na	na	NoRepeat	0	2790	1	2298	2	2111	321	1941
chr4.28337269.A.C	na	na	NoRepeat	0	694	0	681	0	688	73	617
chr2.119581828.T.A	na	na	NoRepeat	0	623	1	597	54	551	62	466
chr3.177534484.G.C	na	na	NoRepeat	1	687	0	624	0	573	67	540
chr10.85069707.A.T	na	na	NoRepeat	0	1495	1	1013	0	1067	162	880
chr6.78126830.G.A	na	na	NoRepeat	0	575	0	509	0	516	81	401
chr12.54718790.A.G	na	na	NoRepeat	0	695	449	799	289	630	366	635
chr4.181224251.G.A	na	na	NoRepeat	0	930	0	889	1	947	105	606
chr2.214025264.G.T	na	na	NoRepeat	0	1053	1	670	1	804	144	632
chr20.9721834.G.A	na	na	NoRepeat	0	1398	0	931	3	972	138	898
chr6.148173427.G.T	na	na	NoRepeat	0	383	0	371	0	305	55	234
chr11.42376029.C.A	na	na	NoRepeat	0	3109	0	2604	1	1631	376	2945
chr11.114817550.T.A	na	na	NoRepeat	0	1887	0	1530	2	1661	162	1471
chr1.201854620.G.A	na	na	NoRepeat	0	897	31	684	280	690	235	843
chr9.122163176.T.C	na	na	NoRepeat	1	1749	1	1448	139	1339	1	1337
chr1.105643608.A.G	na	na	NoRepeat	1	740	4	681	123	701	128	757
chr4.10140545.G.T	na	na	NoRepeat	0	589	10	611	42	518	51	593
chr20.25666393.C.T	na	na	NoRepeat	0	702	10	528	79	286	187	593
chr14.44045493.G.T	na	na	NoRepeat	0	718	0	730	0	676	45	642
chr14.83277785.C.G	na	na	chr14_83277606_83277964	0	493	0	487	1	491	51	472
chr9.122678370.T.A	na	na	NoRepeat	2	2540	0	1324	1	1407	405	1637
chr3.87626818.G.A	na	na	NoRepeat	2	642	0	429	0	478	50	474
chr13.68018315.A.G	na	na	chr13_68018070_68018428	0	2014	2	1681	107	756	231	1881
chr12.24323902.C.T	na	na	NoRepeat	0	923	1	545	0	555	84	601
chr17.76043003.A.T	na	na	NoRepeat	0	2568	0	2497	0	1039	281	2433
chr6.72312189.A.G	na	na	NoRepeat	1	2762	0	1706	0	1507	244	1725
chr18.55548020.T.C	na	na	NoRepeat	0	1587	0	1218	1	1019	157	871
chr3.85705234.C.G	na	na	NoRepeat	0	1881	0	1135	0	1382	131	1267
chr8.112783315.T.G	na	na	NoRepeat	0	936	301	927	255	1230	276	970
chr15.92334133.C.T	na	na	NoRepeat	0	605	0	706	0	666	72	639
chr11.23214209.T.C	na	na	NoRepeat	0	1829	0	1163	0	1242	149	1458
chr14.106745865.G.A	na	na	chr14_106745769_106745963	0	135	60	166	25	88	41	141
chr10.56743053.C.G	na	na	NoRepeat	0	722	0	445	0	504	68	409
chr15.43349250.T.A	na	na	NoRepeat	0	1071	0	833	0	812	89	651
chr15.37434000.A.G	na	na	NoRepeat	0	1059	0	1288	1	1121	99	783
chr18.41435132.C.A	na	na	NoRepeat	0	708	0	599	1	593	74	423
chr5.81551458.G.T	na	na	NoRepeat	0	1025	2	1002	79	1019	94	1123
chr8.127196858.G.T	na	na	NoRepeat	0	990	0	1607	2	1425	126	1235
chr6.45675977.C.T	na	na	NoRepeat	0	1569	342	3375	316	3107	536	4411
chr3.78198126.G.A	na	na	NoRepeat	2	798	0	647	1	761	71	659
chr4.8154711.A.T	na	na	NoRepeat	0	467	0	506	1	339	55	399
chrX.141159057.A.G	na	na	NoRepeat	0	554	246	473	297	504	211	444
chr13.62194187.A.T	na	na	NoRepeat	0	499	0	228	0	403	38	292
chr2.236801009.A.G	na	na	NoRepeat	0	1820	0	1872	1	687	425	1824
chr15.27758962.G.T	na	na	NoRepeat	2	721	1	684	76	697	71	587
chr11.50231767.G.T	na	na	NoRepeat	0	1202	0	1027	1	879	105	800
chr13.55205232.G.T	na	na	NoRepeat	0	1048	3	542	0	768	76	643
chr2.141972122.A.G	na	na	NoRepeat	0	871	4	575	74	681	49	421
chr13.111596471.C.T	na	na	NoRepeat	0	1766	0	1291	0	1287	176	1426
chr4.43723198.A.T	na	na	NoRepeat	0	762	0	607	0	760	50	661
chr10.84430375.G.A	na	na	NoRepeat	0	759	1	590	3	604	89	514
chr17.78495053.G.A	na	na	NoRepeat	0	470	0	497	1	384	55	393
chr1.186178566.A.T	na	na	NoRepeat	0	1885	0	1418	0	1586	194	1432
chr7.93124357.G.T	na	na	NoRepeat	0	1169	1	935	0	1163	117	868
chr8.62531493.T.C	na	na	NoRepeat	0	1727	5	3071	176	2362	194	2077
chr5.71319499.C.A	na	na	NoRepeat	1	1503	0	1461	0	1360	151	1518
chr21.18206471.C.T	na	na	NoRepeat	0	1206	44	1085	1	1242	1	1285
chr8.94576678.C.T	na	na	chr8_94576543_94576923	1	905	2	1293	0	1314	93	1227
chr6.54780878.C.T	na	na	NoRepeat	1	1261	261	2142	342	2757	315	2949
chr16.18904502.G.C	na	na	NoRepeat	0	433	0	292	0	281	45	271
chr3.103010287.A.T	na	na	NoRepeat	1	1356	422	919	419	970	398	881
chr15.26878468.T.A	na	na	NoRepeat	0	1801	495	1654	206	1223	329	1395
chr8.2061608.C.T	na	na	NoRepeat	1	618	2	554	50	477	77	517
chr14.88215616.G.T	na	na	chr14_88215111_88215699	2	1873	591	1970	460	1648	482	1713
chr12.25406422.A.T	na	na	chr12_25406300_25406418	2	1429	318	733	208	677	430	855
chr4.161998075.A.T	na	na	NoRepeat	0	946	0	824	0	1245	79	810
chr4.47032424.A.T	na	na	NoRepeat	0	922	0	879	0	962	85	766
chr18.10868192.C.A	na	na	NoRepeat	0	1234	0	922	2	792	105	844
chr5.66798436.T.A	na	na	NoRepeat	0	706	0	822	0	895	98	875
chr11.42067591.A.G	na	na	NoRepeat	1	1087	0	715	0	786	87	812
chr13.38349447.C.T	na	na	NoRepeat	0	1364	1	934	1	1089	117	975
chr11.114836098.C.T	na	na	chr11_114836053_114836389	1	2533	1	2066	0	1219	272	2113
chr8.81977047.C.A	na	na	NoRepeat	0	564	1	775	0	872	64	685
chr12.18253887.T.A	na	na	NoRepeat	0	1007	2	620	0	641	108	711
chr10.82251490.T.C	na	na	chr10_82251487_82251585	1	2183	0	1862	0	1410	263	1326
chr7.136893855.G.C	na	na	NoRepeat	0	798	0	747	0	746	69	624
chr1.178574052.A.T	na	na	NoRepeat	0	1066	1	974	0	1020	168	1023
chr14.45079452.C.A	na	na	NoRepeat	0	560	0	720	0	690	40	518
chr8.2309747.G.T	na	na	NoRepeat	1	1547	0	1397	2	1137	444	1069
chr8.28788771.A.T	na	na	NoRepeat	0	1090	0	921	1	921	81	725
chr6.39840287.C.A	na	na	NoRepeat	0	1579	23	3991	427	3436	508	4120
chr6.147550472.C.T	na	na	NoRepeat	1	885	5	658	140	724	179	540
chr7.106104372.C.G	na	na	NoRepeat	2	2051	0	1710	1	1562	152	1373
chr1.80326729.T.C	na	na	NoRepeat	0	775	0	689	1	773	99	734
chr6.166586336.G.T	na	na	NoRepeat	0	370	0	397	1	260	25	245
chr1.144928937.G.A	na	na	NoRepeat	0	1934	0	1433	0	1419	108	1500
chr3.84428765.G.A	na	na	V$EVI1_03	1	1079	217	686	77	320	225	910
chr18.35886898.T.G	na	na	NoRepeat	0	1354	0	1035	2	914	141	784
chr3.82069027.G.T	na	na	NoRepeat	0	881	0	582	82	697	1	622
chr14.83980602.G.C	na	na	NoRepeat	0	605	205	645	217	727	195	702
chr1.22954747.T.G	na	na	NoRepeat	1	818	0	1093	0	633	95	821
chr16.64100972.T.A	na	na	NoRepeat	0	1277	0	1222	0	910	84	924
chr3.82031999.A.T	na	na	chr3_82031683_82032040	0	1803	0	1335	1	701	198	1503
chr7.139514322.A.G	na	na	NoRepeat	0	1615	0	1729	1	1414	150	1199
chrX.117819373.A.T	na	na	chrX_117819364_117819608	0	555	0	391	0	519	83	379
chr1.4841550.T.G	na	na	NoRepeat	0	441	3	464	40	330	47	494
chr7.108820624.G.T	na	na	NoRepeat	0	1527	572	1570	207	554	326	1280
chr18.14455374.C.T	na	na	NoRepeat	0	353	1	235	27	271	51	297
chr4.147051697.T.C	na	na	NoRepeat	0	894	0	952	0	869	94	904
chr10.133152870.C.A	na	na	NoRepeat	0	549	0	462	0	383	75	512
chr5.50770777.A.G	na	na	NoRepeat	0	797	0	752	0	882	51	804
chr3.163390123.T.G	na	na	NoRepeat	0	1118	12	744	124	1335	98	1188
chr15.58208787.A.T	na	na	NoRepeat	1	2537	0	3515	0	1080	559	2172
chr4.104132749.G.C	na	na	NoRepeat	0	2082	664	1788	238	863	470	1874
chr12.79180296.A.G	na	na	NoRepeat	0	943	0	704	0	664	80	778
chr10.69182769.C.A	na	na	NoRepeat	0	1412	9	812	114	886	120	686
chr8.83085954.C.A	na	na	NoRepeat	0	1335	595	1561	871	1879	690	1589
chr8.20822104.G.T	na	na	NoRepeat	0	1291	1	1352	1	928	105	788
chr8.22971541.A.T	na	na	NoRepeat	2	1193	1	1268	0	1077	234	870
chr22.17299572.A.G	na	na	NoRepeat	3	1379	723	1428	184	560	706	2172
chr3.104780431.C.G	na	na	chr3_104780114_104780689	0	2137	2	1455	0	737	193	1560
chr20.57480614.G.A	na	na	NoRepeat	0	883	0	1113	0	771	112	992
chr1.5514778.C.A	na	na	NoRepeat	0	390	0	469	0	267	30	408
chrX.108836542.A.G	na	na	NoRepeat	1	846	0	608	1	625	140	635
chr17.67423063.C.T	na	na	NoRepeat	0	1017	130	922	278	727	349	847
chr5.33599950.G.T	na	na	NoRepeat	0	72	17	88	0	72	0	71
chr2.89473486.G.A	na	na	NoRepeat	0	843	1	962	0	892	81	1008
chr16.47896970.A.G	na	na	NoRepeat	0	781	4	780	62	683	72	771
chr20.40691913.A.G	na	na	chr20_40691819_40691976	0	603	0	834	0	553	60	777
chr4.14182221.A.T	na	na	NoRepeat	0	2028	0	1724	0	1619	209	1767
chr16.1142090.A.G	na	na	NoRepeat	0	219	0	225	0	46	34	223
chr6.69992240.G.A	na	na	NoRepeat	1	1297	5	1502	119	1272	127	1199
chr18.28249665.C.T	na	na	NoRepeat	0	752	112	395	48	374	77	328
chr3.54919501.A.G	na	na	chr3_54919469_54919634	0	600	0	479	0	424	69	508
chr7.129384933.A.T	na	na	NoRepeat	0	855	0	875	0	717	84	638
chr11.97215299.G.T	na	na	NoRepeat	0	1993	0	2067	0	758	184	2038
chr11.99967805.C.A	na	na	NoRepeat	1	895	2	689	72	796	98	657
chr3.41368988.G.A	na	na	NoRepeat	0	1314	1	1042	1	920	138	991
chr4.116193584.C.T	na	na	NoRepeat	1	2138	505	2185	297	1008	464	1835
chr12.17174242.T.C	na	na	chr12_17174242_17174413	0	513	0	374	0	355	52	413
chr4.143065201.T.C	na	na	NoRepeat	2	1877	0	1527	1	1755	170	1388
chr12.2876355.C.T	na	na	NoRepeat	0	1374	0	1371	2	570	203	1250
chr1.46530717.C.G	na	na	NoRepeat	0	811	0	809	0	752	86	754
chr19.30614987.G.T	na	na	NoRepeat	0	445	6	391	87	335	60	347
chr10.61672588.T.C	na	na	NoRepeat	1	650	200	477	193	454	155	412
chr2.64731782.T.C	na	na	NoRepeat	1	630	0	508	51	535	60	572
chr7.52783074.G.T	na	na	NoRepeat	0	836	0	836	1	793	91	852
chr4.141298626.G.A	na	na	NoRepeat	0	1224	1	1042	0	1290	100	950
chr12.105434032.A.G	na	na	NoRepeat	0	657	0	477	0	475	58	467
chr8.131634692.C.T	na	na	NoRepeat	1	1910	0	2310	3	2380	161	2341
chrX.83065461.G.A	na	na	NoRepeat	0	874	0	857	1	1064	47	625
chr7.147997577.A.G	na	na	NoRepeat	1	1517	356	1624	179	931	386	1765
chr1.26256359.C.T	na	na	NoRepeat	1	370	0	453	0	291	35	369
chr9.24008634.C.A	na	na	NoRepeat	0	1153	4	700	114	660	69	643
chr14.97009099.A.C	na	na	chr14_97009081_97009269	0	1142	0	1093	0	1156	111	1155
chr1.15368870.C.A	na	na	NoRepeat	1	259	67	363	47	238	63	335
chr3.87399119.T.A	na	na	NoRepeat	0	1196	4	897	0	611	141	1128
chr16.59996590.G.T	na	na	NoRepeat	1	1501	9	1371	99	1234	132	1223
chr15.61429545.C.T	na	na	NoRepeat	0	771	1	883	35	654	88	899
chr1.247206480.G.A	na	na	NoRepeat	0	779	252	523	230	525	257	526
chr7.129983841.A.G	na	na	NoRepeat	0	2175	5	2589	75	875	290	1911
chr7.88820701.G.T	na	na	NoRepeat	0	921	2	873	82	1012	0	807
chr8.29420360.G.T	na	na	NoRepeat	0	698	0	495	1	500	63	483
chr2.178711304.T.C	na	na	NoRepeat	2	1468	0	1116	101	1152	0	1121
chr1.199748622.G.T	na	na	NoRepeat	0	622	0	358	0	528	62	457
chr1.26555298.A.T	na	na	NoRepeat	1	386	190	502	108	387	149	430
chr5.72922678.C.A	na	na	NoRepeat	1	808	0	725	0	696	77	838
chr14.39342513.G.A	na	na	NoRepeat	0	893	0	1159	0	1304	102	1090
chr1.44809574.T.A	na	na	V$OCT1_07	0	2721	0	3155	1	1450	322	3021
chr2.163933847.A.T	na	na	NoRepeat	4	1303	1	1153	0	1120	246	1032
chr3.81200093.T.G	na	na	NoRepeat	0	932	274	554	358	721	325	629
chr7.142981619.C.A	na	na	NoRepeat	0	588	0	550	0	443	47	506
chr9.122507317.C.G	na	na	NoRepeat	0	1998	3	1862	77	768	220	1865
chr3.94027412.C.A	na	na	NoRepeat	0	596	0	384	0	380	34	345
chr5.89943179.G.A	na	na	NoRepeat	0	1262	0	939	0	1048	107	1253
chr17.75746101.C.A	na	na	NoRepeat	0	530	0	426	0	272	48	333
chr10.15131987.C.G	na	na	NoRepeat	0	419	0	287	27	267	25	342
chr3.35859074.T.A	na	na	chr3_35858932_35859261	0	824	0	607	0	306	95	729
chr3.3130609.A.G	na	na	NoRepeat	0	1386	9	1119	122	1180	156	1258
chr8.24350297.C.A	na	na	NoRepeat	0	545	0	464	47	559	0	369
chr16.53978833.G.T	na	na	NoRepeat	0	563	0	692	0	572	65	688
chr2.59563423.G.T	na	na	NoRepeat	1	1015	0	709	1	1165	55	836
chr7.54553952.C.T	na	na	NoRepeat	0	897	0	909	0	822	91	1036
chr22.49378527.A.G	na	na	NoRepeat	0	236	25	278	0	329	0	379
chr4.91957123.T.A	na	na	NoRepeat	1	1263	0	992	0	1160	107	931
chr12.104362842.C.T	na	na	NoRepeat	0	337	0	252	0	270	59	325
chr9.97573935.G.A	na	na	NoRepeat	0	148	0	131	0	116	20	134
chr12.29021193.G.A	na	na	NoRepeat	0	805	0	426	65	679	0	704
chr10.67206434.A.G	na	na	NoRepeat	0	802	0	458	0	530	74	422
chr5.126937231.C.A	na	na	chr5_126937046_126937291	0	1744	0	2058	0	1003	177	1886
chr4.19115824.C.T	na	na	NoRepeat	2	1416	0	1204	1	1318	111	1102
chr1.243928528.A.C	na	na	NoRepeat	0	517	0	286	0	348	52	305
chr8.70688496.T.A	na	na	NoRepeat	0	721	0	1123	0	1033	67	856
chr13.46577203.C.T	na	na	NoRepeat	0	1545	11	1230	82	750	172	1424
chr13.78081163.A.T	na	na	NoRepeat	0	1874	0	1490	0	572	294	1859
chr6.94782153.A.G	na	na	NoRepeat	0	1237	390	823	180	416	485	984
chr18.64222572.A.T	na	na	NoRepeat	0	1042	166	557	198	680	142	471
chr2.49869380.C.T	na	na	chr2_49869184_49869467	0	2397	2	1994	0	2762	211	2067
chr3.95294654.A.T	na	na	NoRepeat	0	375	0	290	0	268	29	235
chr13.85096927.A.G	na	na	NoRepeat	2	736	275	520	308	624	320	600
chr15.79361274.A.G	na	na	NoRepeat	0	510	0	681	0	492	35	607
chr4.56589817.A.T	na	na	NoRepeat	0	983	0	948	0	936	107	722
chr9.66744018.C.T	na	na	NoRepeat	0	1241	0	1048	0	1030	244	1107
chr6.98112030.G.A	na	na	NoRepeat	0	657	0	343	0	416	28	371
chr4.168640848.C.T	na	na	NoRepeat	1	2340	1048	2457	334	1346	526	2069
chr5.162637565.C.T	na	na	chr5_162637515_162637696	0	1359	0	1149	1	1041	109	1198
chr13.75238415.G.A	na	na	NoRepeat	0	1861	0	1520	0	928	225	1657
chr2.214735826.A.C	na	na	NoRepeat	0	609	7	411	77	605	113	570
chr14.30752419.A.G	na	na	NoRepeat	0	1092	0	1085	0	1420	76	1318
chr6.129678375.G.T	na	na	NoRepeat	1	1847	1032	1742	249	573	918	1671
chr5.163053827.C.A	na	na	NoRepeat	0	1189	0	1034	0	889	116	957
chr3.152594712.A.T	na	na	NoRepeat	0	1053	0	588	0	1000	77	993
chr3.69475356.T.C	na	na	NoRepeat	1	1215	0	1003	0	904	106	987
chr1.8380852.C.T	na	na	NoRepeat	0	94	1	127	11	129	15	135
chr3.95049783.A.T	na	na	NoRepeat	0	593	1	290	0	331	34	325
chr5.38043377.G.T	na	na	NoRepeat	0	1010	1	1002	0	873	89	896
chr9.122306166.G.A	na	na	chr9_122306138_122306415	0	3297	0	2975	0	1315	371	2883
chr16.71330110.G.A	na	na	NoRepeat	2	4844	2	4301	0	2870	325	3727
chr4.101736907.T.C	na	na	NoRepeat	0	969	0	1087	2	994	90	784
chr1.209973163.T.A	na	na	NoRepeat	0	952	1	839	0	886	112	705
chr11.130926127.C.T	na	na	NoRepeat	0	982	5	759	79	854	94	919
chr3.171609943.G.A	na	na	NoRepeat	0	691	0	602	0	736	79	730
chr20.21775325.C.A	na	na	NoRepeat	0	776	394	711	425	754	259	589
chr11.812935.G.T	na	na	NoRepeat	0	721	0	692	0	445	53	493
chrX.95133625.C.T	na	na	NoRepeat	0	475	208	363	230	411	185	364
chr10.109196125.G.A	na	na	NoRepeat	0	1824	0	1316	2	1187	134	1526
chr13.38441720.C.T	na	na	NoRepeat	0	1001	0	639	0	562	91	807
chr18.25120950.T.C	na	na	NoRepeat	0	1166	9	830	148	831	9	622
chr5.73272792.G.A	na	na	NoRepeat	0	789	0	816	0	732	62	806
chr7.120026817.T.C	na	na	NoRepeat	0	692	2	581	74	621	61	435
chr8.23737821.C.T	na	na	NoRepeat	1	1295	0	1041	1	1018	176	906
chr7.120154099.A.T	na	na	chr7_120153928_120154095	0	1946	0	1929	0	701	256	1623
chr18.8565338.C.G	na	na	NoRepeat	0	896	6	746	54	520	93	684
chr4.19594445.C.G	na	na	NoRepeat	0	817	0	692	0	765	93	692
chr10.52763197.C.A	na	na	NoRepeat	2	682	4	419	60	457	59	379
chr1.79917659.G.A	na	na	NoRepeat	0	1326	0	1188	0	1265	130	1373
chr4.181505600.G.T	na	na	NoRepeat	0	911	10	888	103	1120	73	650
chr20.959154.A.T	na	na	NoRepeat	0	966	0	837	0	664	91	667
chr18.11865260.G.A	na	na	NoRepeat	0	428	220	449	82	294	89	342
chrX.29896263.G.A	na	na	NoRepeat	0	92	19	62	0	81	0	45
chr1.194331641.G.A	na	na	NoRepeat	1	984	0	468	0	868	53	691
chr4.181904839.G.T	na	na	NoRepeat	0	755	232	581	153	626	51	410
chr6.56636077.G.A	na	na	NoRepeat	1	1331	1237	2768	1116	2727	1561	3330
chr17.17120353.G.A	na	na	chr17_17120353_17120518	0	116	60	348	54	341	67	497
chr6.56631684.G.A	na	na	NoRepeat	0	1038	685	1805	740	1992	806	2221
chr10.118554752.G.A	na	na	NoRepeat	0	1196	3	738	0	605	102	775
chr14.93230053.G.A	na	na	NoRepeat	0	352	183	527	117	430	184	469
chr18.13589742.G.A	na	na	NoRepeat	0	564	0	484	0	420	51	468
chr4.142008896.G.T	na	na	NoRepeat	0	947	3	917	0	895	89	725
chr13.78961009.A.T	na	na	NoRepeat	0	1128	426	788	204	400	470	926
chr8.97225937.G.T	na	na	chr8_97225766_97225977	1	1098	998	2149	749	1640	660	1517
chr13.70008656.G.T	na	na	NoRepeat	0	685	0	380	0	565	54	484
chr8.112335047.G.T	na	na	NoRepeat	0	674	0	791	0	1170	44	638
chr8.20023137.T.C	na	na	NoRepeat	0	923	1	772	1	622	200	644
chr4.136194723.G.A	na	na	NoRepeat	0	441	0	401	0	466	18	313
chr3.65510741.T.C	na	na	NoRepeat	0	1601	1	921	1	1080	121	1072
chr11.112926132.C.G	na	na	NoRepeat	0	985	0	843	0	912	118	882
chr13.103604404.G.T	na	na	NoRepeat	0	736	0	490	0	501	82	594
chr11.116031904.A.T	na	na	NoRepeat	0	1998	0	1211	0	1251	192	1349
chr18.18944105.A.C	na	na	NoRepeat	0	1887	535	1456	173	695	391	1348
chr10.105729981.T.G	na	na	NoRepeat	0	1403	0	724	2	894	156	1052
chr1.34054019.A.T	na	na	NoRepeat	0	1341	0	1289	0	1064	112	1133
chr5.154665069.G.T	na	na	NoRepeat	1	920	0	947	3	740	82	813
chr8.136717399.T.A	na	na	NoRepeat	0	796	0	1268	0	978	89	898
chr12.130283333.A.G	na	na	NoRepeat	1	1143	1	848	131	872	149	1103
chr3.166304102.T.G	na	na	NoRepeat	0	1911	14	1591	503	1216	822	2341
chr7.146233347.A.T	na	na	NoRepeat	0	916	1	719	0	755	67	759
chr10.71029875.C.T	na	na	NoRepeat	0	1668	0	1214	0	938	255	985
chr13.109270629.C.G	na	na	NoRepeat	0	714	0	509	0	540	80	594
chr3.42622428.C.T	na	na	NoRepeat	0	1286	0	704	0	837	110	962
chr13.83678259.C.A	na	na	NoRepeat	1	681	0	453	1	475	71	462
chr16.6778342.C.A	na	na	NoRepeat	0	1181	0	1059	0	939	130	842
chr16.63445773.C.A	na	na	NoRepeat	2	943	1	973	106	858	122	884
chr5.85555162.G.T	na	na	NoRepeat	0	1154	4	1075	100	1278	125	1253
chr13.43818190.C.A	na	na	NoRepeat	0	804	0	577	0	690	102	624
chr7.115280721.A.G	na	na	chr7_115280421_115281147	0	1879	799	1995	249	802	434	1781
chr1.159237999.G.C	na	na	NoRepeat	0	1245	0	1067	0	1245	125	1141
chr12.101977788.T.A	na	na	NoRepeat	3	1191	0	672	0	674	110	818
chr1.106548415.C.A	na	na	NoRepeat	0	686	0	658	13	756	47	625
chr11.92111659.G.T	na	na	NoRepeat	2	1039	0	891	3	933	114	829
chr2.57387437.A.G	na	na	NoRepeat	0	617	133	417	293	665	263	523
chr11.90169367.G.A	na	na	NoRepeat	0	1835	600	1435	227	827	320	1514
chr1.84986212.G.T	na	na	chr1_84986193_84986413	5	814	10	895	4	897	128	1039
chr4.179674688.G.T	na	na	chr4_179674591_179674801	0	775	109	629	215	774	148	495
chr4.60437549.C.A	na	na	NoRepeat	0	1596	1	2251	1	777	145	1383
chr4.103551296.C.T	na	na	NoRepeat	1	574	0	476	0	467	52	466
chrX.79367881.C.A	na	na	NoRepeat	0	222	0	238	0	252	54	205
chr11.120682581.A.T	na	na	NoRepeat	0	1784	1	1329	0	1188	383	1492
chr1.115998235.C.T	na	na	NoRepeat	0	1664	1	1788	0	1282	185	1583
chr10.15995788.C.A	na	na	NoRepeat	0	1367	0	791	0	967	124	965
chr5.129072383.T.A	na	na	NoRepeat	0	965	0	1115	0	1150	89	1031
chr5.89999020.G.A	na	na	chr5_89998936_89999124	0	579	2	501	44	617	51	637
chr9.73848371.G.A	na	na	NoRepeat	0	864	3	570	64	553	7	579
chr10.128583520.C.T	na	na	NoRepeat	0	474	0	330	0	380	48	420
chrX.135837936.T.G	na	na	NoRepeat	0	579	0	395	0	528	128	485
chr3.97064413.C.T	na	na	NoRepeat	1	1980	7	1304	185	1343	195	1309
chr6.97524870.G.C	na	na	NoRepeat	0	462	0	349	0	316	47	325
chr6.117053692.G.A	na	na	chr6_117053689_117053814	0	1439	0	807	0	940	107	929
chr15.87275472.A.T	na	na	NoRepeat	0	1262	0	952	102	1120	0	1105
chr2.214183788.G.A	na	na	NoRepeat	0	804	0	792	0	1034	146	726
chr2.211620541.A.T	na	na	NoRepeat	0	1084	0	882	2	1077	168	938
chr1.156854219.C.T	na	na	NoRepeat	0	625	0	875	1	482	66	541
chr10.3154329.A.T	na	na	NoRepeat	0	286	0	270	0	280	39	288
chr21.29201633.G.T	na	na	NoRepeat	0	622	0	693	0	686	53	522
chr1.76691453.G.T	na	na	NoRepeat	1	1334	0	1537	0	1376	134	1423
chr3.185476394.T.G	na	na	NoRepeat	0	1203	1	1239	0	1148	131	1078
chr6.13110680.C.A	na	na	NoRepeat	0	1628	1	1092	50	1430	0	1281
chr8.62151969.A.T	na	na	NoRepeat	0	1339	0	1591	0	1508	125	1378
chr2.13457772.C.T	na	na	NoRepeat	0	930	0	766	154	1049	101	1029
chr4.29331694.T.G	na	na	NoRepeat	0	1428	11	1391	134	1548	135	1153
chr5.23351038.G.T	na	na	NoRepeat	1	756	0	643	0	784	57	666
chr4.171857496.G.C	na	na	NoRepeat	0	1051	388	963	438	1125	275	872
chr20.22609010.C.A	na	na	NoRepeat	0	667	15	635	119	517	125	474
chr2.57791075.T.C	na	na	NoRepeat	1	1213	0	936	1	1279	46	1011
chr13.72265157.A.G	na	na	NoRepeat	0	1440	0	1243	0	494	169	1447
chr18.2134134.G.A	na	na	NoRepeat	0	1126	1	992	101	743	126	720
chr15.79532526.A.T	na	na	NoRepeat	0	1211	0	1484	0	1218	115	1281
chr6.48389232.G.T	na	na	NoRepeat	0	998	1	1002	3	1349	69	1232
chr2.22840886.G.A	na	na	chr2_22840678_22840969	0	767	9	720	204	1178	203	1120
chr6.62733046.A.T	na	na	NoRepeat	0	699	0	349	0	391	66	437
chrX.112571470.G.T	na	na	NoRepeat	0	880	429	779	235	429	401	814
chr2.37732493.T.G	na	na	NoRepeat	0	1387	749	1712	496	1174	1046	2501
chr2.29273796.G.A	na	na	NoRepeat	0	471	12	582	101	544	148	720
chr1.238249883.A.T	na	na	NoRepeat	0	915	282	618	188	579	180	540
chr1.104954979.T.C	na	na	NoRepeat	0	656	106	669	184	787	200	808
chrX.107651823.A.T	na	na	NoRepeat	0	527	0	557	0	626	125	472
chr13.66204815.C.A	na	na	NoRepeat	1	1473	0	898	1	1107	139	997
chr5.158613824.C.T	na	na	NoRepeat	0	480	0	457	0	404	34	387
chr21.19474735.T.C	na	na	NoRepeat	0	1166	8	1277	125	1331	128	1196
chr12.31080290.C.T	na	na	NoRepeat	0	483	0	273	38	308	50	423
chr12.39018591.G.T	na	na	NoRepeat	0	1856	0	1572	1	1046	170	1589
chr3.138700135.A.G	na	na	NoRepeat	0	840	0	595	0	489	75	557
chr16.10300060.C.T	na	na	NoRepeat	1	2425	19	2045	181	1442	273	1606
chr14.84035730.G.A	na	na	NoRepeat	0	477	5	642	56	601	47	486
chr6.26450075.A.G	na	na	NoRepeat	0	695	0	570	0	596	45	565
chr21.41742231.G.A	na	na	NoRepeat	0	539	2	485	0	634	37	478
chr6.94432757.T.G	na	na	NoRepeat	0	865	0	446	0	526	84	512
chr10.122461821.T.A	na	na	NoRepeat	1	1153	0	692	0	697	110	930
chr11.125016406.C.T	na	na	chr11_125016338_125017046	0	622	0	532	0	575	68	598
chr10.132844143.A.T	na	na	NoRepeat	0	553	0	565	0	408	41	500
chr11.24898864.G.C	na	na	NoRepeat	0	1281	0	1071	0	576	186	1336
chr15.82043500.G.C	na	na	NoRepeat	0	592	0	661	0	589	67	633
chr13.72319474.T.A	na	na	NoRepeat	0	623	0	373	1	389	56	437
chr5.20366622.C.A	na	na	NoRepeat	0	416	0	332	2	356	26	404
chr4.96996937.G.A	na	na	NoRepeat	1	1909	647	1758	269	936	397	1736
chr9.11790758.C.A	na	na	NoRepeat	1	595	0	467	59	502	87	452
chr16.10716344.G.A	na	na	NoRepeat	0	252	0	298	1	185	28	243
chr19.43159755.C.A	na	na	NoRepeat	1	959	3	829	54	500	87	677
chr3.78860594.C.A	na	na	chr3_78860341_78860599	0	2111	0	1376	1	1667	136	1563
chr6.17210641.C.T	na	na	NoRepeat	1	1189	0	900	0	973	122	972
chr1.242634753.T.C	na	na	NoRepeat	0	722	1	641	0	536	97	624
chr11.125026330.G.A	na	na	NoRepeat	0	291	1	300	0	291	36	321
chr2.125471655.T.C	na	na	NoRepeat	0	1631	8	1218	100	1161	0	1018
chr5.104389881.C.A	na	na	NoRepeat	0	663	0	534	0	630	44	553
chrX.145966310.T.A	na	na	NoRepeat	0	633	0	463	0	662	127	522
chr2.220360596.C.G	na	na	NoRepeat	0	628	0	642	0	98	196	698
chr16.60573985.A.C	na	na	NoRepeat	0	933	0	851	0	668	65	850
chr8.25352867.G.A	na	na	NoRepeat	0	1361	417	1049	301	821	106	761
chr9.133350372.C.T	na	na	NoRepeat	1	369	0	322	0	232	68	274
chr1.82184959.G.T	na	na	NoRepeat	2	1037	2	947	0	949	92	1010
chr19.10712243.A.T	na	na	NoRepeat	0	691	0	859	0	783	94	802
chr20.40413623.A.T	na	na	NoRepeat	0	983	0	1134	0	807	72	1100
chr8.79477095.A.G	na	na	NoRepeat	0	1109	3	1439	96	1578	106	1215
chr7.30834477.C.T	na	na	NoRepeat	0	592	0	728	257	1022	382	1242
chr1.142671011.G.T	na	na	NoRepeat	0	1171	241	1231	173	700	232	1141
chr4.126754892.G.A	na	na	NoRepeat	4	3957	1336	3568	578	2155	758	3164
chr20.25663562.C.T	na	na	NoRepeat	0	721	9	441	119	598	143	541
chr3.123716953.C.T	na	na	NoRepeat	0	1197	0	996	0	834	126	875
chr3.83576782.G.A	na	na	NoRepeat	0	652	0	438	0	524	42	445
chr13.82830886.G.T	na	na	NoRepeat	1	1336	0	670	1	880	99	914
chr8.139804984.G.C	na	na	NoRepeat	0	872	0	1885	0	1224	109	1036
chr2.154328488.A.T	na	na	NoRepeat	0	1016	0	788	1	945	101	775
chr4.61319421.T.C	na	na	NoRepeat	0	1703	0	2300	1	752	150	1482
chr6.70020351.A.G	na	na	NoRepeat	1	1125	1	1163	1	1335	115	876
chr6.98952729.C.T	na	na	NoRepeat	0	481	0	275	0	312	30	294
chr7.82470003.C.A	na	na	NoRepeat	0	989	0	898	0	916	122	852
chr2.157727224.G.A	na	na	NoRepeat	1	1053	1	812	1	1004	79	770
chr5.177384195.G.T	na	na	NoRepeat	0	444	0	460	0	293	35	392
chr5.116889000.G.A	na	na	NoRepeat	0	1853	720	1841	205	875	492	1872
chr5.143005226.T.C	na	na	NoRepeat	1	1006	256	1138	171	844	190	816
chr4.161801329.A.T	na	na	NoRepeat	0	456	0	500	2	650	57	515
chr15.39360618.C.T	na	na	NoRepeat	0	2264	0	3169	0	1094	281	1949
chr1.226361833.G.A	na	na	NoRepeat	1	647	0	608	1	391	68	405
chr5.39251362.G.T	na	na	NoRepeat	0	51	6	42	0	67	0	61
chr10.133817215.G.C	na	na	NoRepeat	0	60	0	41	0	36	7	53
chr4.75869142.G.T	na	na	NoRepeat	0	2372	792	2169	281	1087	509	2019
chr1.83220630.A.G	na	na	NoRepeat	0	1166	6	1057	106	1224	119	1102
chr7.62546326.G.T	na	na	NoRepeat	0	573	1	545	20	499	0	583
chr1.196081221.T.G	na	na	NoRepeat	0	2407	15	1663	292	2315	243	1909
chr6.78274552.A.T	na	na	NoRepeat	0	2194	0	1784	1	887	266	1748
chr1.88239403.G.A	na	na	NoRepeat	0	990	0	1101	0	497	89	993
chr8.100159948.T.C	na	na	NoRepeat	0	860	3	1191	79	1274	63	985
chr2.151164919.A.G	na	na	NoRepeat	0	367	1	261	36	338	44	295
chr2.3659068.T.A	na	na	NoRepeat	1	645	115	573	215	605	235	606
chr12.7890309.T.C	na	na	NoRepeat	0	1048	11	994	91	935	108	1090
chr7.96162218.T.A	na	na	NoRepeat	0	1760	0	1625	1	1589	134	1355
chr17.76720211.C.A	na	na	NoRepeat	0	1776	1	1656	0	664	188	1468
chr18.54590915.C.G	na	na	NoRepeat	0	706	81	546	78	578	14	434
chr2.205585042.G.T	na	na	NoRepeat	1	1074	1	736	0	926	110	855
chr9.31660867.G.A	na	na	NoRepeat	0	1660	0	1348	0	1185	175	1064
chr3.142258802.A.C	na	na	NoRepeat	0	819	285	568	231	550	235	522
chr1.209708318.G.C	na	na	NoRepeat	2	1693	625	1428	628	1195	540	1110
chr17.76651967.C.A	na	na	NoRepeat	0	534	0	467	0	340	42	433
chr4.85526169.A.G	na	na	NoRepeat	0	1032	0	798	0	757	94	705
chr3.175515933.G.T	na	na	NoRepeat	0	1165	1	840	0	1320	70	1117
chr15.96935125.T.G	na	na	NoRepeat	0	1408	16	1418	214	1438	272	1639
chr18.2410383.T.C	na	na	NoRepeat	0	877	9	719	166	551	187	606
chr10.83586746.C.G	na	na	NoRepeat	0	1000	6	708	127	837	123	664
chr15.24244743.A.T	na	na	NoRepeat	1	1016	4	802	0	602	116	656
chr7.132884005.T.A	na	na	NoRepeat	0	684	0	689	0	467	75	490
chr14.86079612.A.G	na	na	NoRepeat	1	1422	0	1259	0	1230	97	1238
chr13.53316913.G.A	na	na	NoRepeat	0	998	0	674	0	706	86	799
chr5.18256941.G.A	na	na	NoRepeat	0	1066	0	1131	0	1377	105	1219
chr4.149236844.G.A	na	na	NoRepeat	0	758	0	702	70	777	52	620
chr6.11595004.G.A	na	na	NoRepeat	2	842	1	633	72	727	62	699
chr12.117264329.G.A	na	na	V$CHX10_01	0	1701	0	1689	0	600	217	1681
chr1.38065741.G.T	na	na	V$GATA_C	0	539	0	741	0	464	38	551
chr13.22426837.T.C	na	na	NoRepeat	0	1524	339	749	430	841	519	962
chr9.118825310.A.T	na	na	NoRepeat	0	512	0	510	0	446	138	454
chr1.14021855.G.T	na	na	NoRepeat	0	635	0	525	0	502	79	495
chr5.136637499.G.T	na	na	NoRepeat	0	773	0	708	0	728	81	657
chr9.125506552.C.A	na	na	NoRepeat	1	1572	0	1054	0	989	130	1184
chr14.30498324.G.T	na	na	NoRepeat	1	1575	715	1898	1102	2195	995	2012
chr1.5451499.G.A	na	na	NoRepeat	2	778	1	926	0	777	105	938
chr12.115041036.C.T	na	na	NoRepeat	1	3067	17	2648	244	2225	332	2442
chr13.57926761.C.T	na	na	NoRepeat	0	1074	333	615	353	750	284	657
chr1.49448765.A.C	na	na	NoRepeat	0	1131	0	839	0	1025	92	996
chr6.96232870.C.A	na	na	NoRepeat	0	616	0	394	0	535	61	424
chr2.103003089.G.T	na	na	NoRepeat	1	747	0	832	3	803	136	827
chr10.47696048.T.A	na	na	NoRepeat	1	1275	0	707	0	865	102	942
chr16.26929655.C.A	na	na	NoRepeat	0	1575	1012	1630	292	619	868	1547
chr7.52902187.T.G	na	na	NoRepeat	0	1646	19	1613	589	1440	656	1706
chr16.82910979.C.T	na	na	NoRepeat	2	2099	0	1235	0	1117	242	1163
chr2.29275637.G.A	na	na	NoRepeat	0	201	1	321	74	329	88	365
chr6.65776016.C.A	na	na	NoRepeat	0	685	4	525	90	534	74	320
chr3.189110603.C.A	na	na	NoRepeat	1	766	0	683	0	881	68	695
chr6.49039791.T.C	na	na	NoRepeat	0	739	3	597	106	844	127	836
chr7.137154786.G.A	na	na	NoRepeat	0	754	1	715	82	685	78	618
chr11.59971458.A.T	na	na	NoRepeat	0	1075	406	772	191	485	400	844
chr12.81420976.G.C	na	na	NoRepeat	0	1141	0	747	0	1005	114	905
chr4.27116701.C.T	na	na	NoRepeat	0	1001	0	1047	0	737	107	834
chr3.47423383.C.T	na	na	NoRepeat	1	572	0	616	0	458	60	526
chr1.169396225.A.G	na	na	NoRepeat	1	716	126	623	363	821	279	712
chr2.102916563.A.G	na	na	NoRepeat	0	1687	1	1501	0	1868	338	1825
chr3.187101731.A.T	na	na	NoRepeat	1	1242	448	1273	715	1626	386	1169
chr13.22370481.G.T	na	na	NoRepeat	0	667	6	605	62	607	85	573
chr5.13987656.G.T	na	na	NoRepeat	0	582	1	755	0	543	54	624
chr16.6155071.G.T	na	na	NoRepeat	0	508	3	391	38	467	53	362
chr3.56158023.T.A	na	na	NoRepeat	0	934	0	682	0	699	107	731
chr5.115133254.T.C	na	na	NoRepeat	0	1102	0	971	0	976	97	1064
chr10.99795544.C.T	na	na	NoRepeat	0	638	0	414	0	317	66	335
chr5.20148610.C.T	na	na	NoRepeat	0	1004	0	797	136	842	166	836
chr19.30437551.T.G	na	na	chr19_30437495_30437609	1	1160	0	702	0	677	85	651
chr10.86686496.A.C	na	na	NoRepeat	1	1641	0	794	0	942	190	929
chr17.8449092.G.A	na	na	NoRepeat	0	410	93	666	98	793	129	922
chr10.68682850.A.T	na	na	NoRepeat	0	1552	2	1208	0	428	147	1020
chr11.111077333.G.T	na	na	NoRepeat	0	699	4	512	64	655	70	523
chr16.53448768.G.T	na	na	NoRepeat	0	1260	329	1091	154	676	229	1141
chr1.29399193.A.T	na	na	NoRepeat	0	477	0	512	2	431	47	471
chr12.11436564.G.A	na	na	NoRepeat	1	1229	0	879	0	726	136	822
chr7.41291481.C.A	na	na	NoRepeat	0	787	0	1029	0	838	146	1159
chr9.1546122.C.T	na	na	NoRepeat	0	866	0	760	0	878	77	823
chr14.20249871.G.A	na	na	NoRepeat	1	1989	5	2402	171	2325	107	2345
chr11.34560761.C.T	na	na	chr11_34560738_34560838	0	2436	1	3049	0	2090	281	2625
chr1.98459793.T.A	na	na	NoRepeat	0	779	1	888	0	1017	87	1001
chr2.235625357.T.C	na	na	NoRepeat	0	1404	692	1141	564	1033	580	1051
chr18.9748125.G.A	na	na	NoRepeat	0	910	0	790	0	669	107	714
chr18.7878487.G.A	na	na	NoRepeat	0	803	1	579	54	659	58	745
chr6.65155336.G.A	na	na	NoRepeat	1	836	0	580	0	646	54	490
chr5.97051930.A.G	na	na	NoRepeat	0	1079	1	810	67	991	93	1020
chr13.88969887.A.G	na	na	NoRepeat	1	594	2	375	0	536	44	453
chr10.116360963.T.G	na	na	NoRepeat	1	1222	1	828	1	684	154	904
chr1.248286227.C.A	na	na	NoRepeat	0	1074	8	602	91	730	98	763
chr6.36983796.A.T	na	na	NoRepeat	0	498	76	1094	68	950	124	1339
chr17.9348334.C.T	na	na	V$MEIS1AHOXA9_01	0	345	100	484	85	554	99	603
chr1.15338199.G.C	na	na	NoRepeat	1	563	0	710	0	505	128	560
chr12.16464850.G.A	na	na	NoRepeat	0	1057	295	675	167	589	280	632
chr3.60384489.C.A	na	na	NoRepeat	0	945	5	695	119	785	95	735
chr3.23027721.A.T	na	na	NoRepeat	0	901	0	636	0	725	59	583
chr9.32978730.C.A	na	na	NoRepeat	0	2175	0	2054	0	715	216	1493
chr6.99163319.A.T	na	na	NoRepeat	1	915	0	467	0	531	36	518
chr12.45542146.A.T	na	na	NoRepeat	0	1035	0	847	0	784	84	746
chr17.14720577.T.C	na	na	NoRepeat	0	1175	0	1588	1	1905	115	1997
chr8.139671847.C.A	na	na	NoRepeat	0	756	0	2157	0	1232	83	1001
chr2.29275582.G.A	na	na	NoRepeat	0	240	3	326	66	323	93	397
chr4.12634047.C.G	na	na	NoRepeat	0	1260	331	1396	229	768	456	1183
chr4.164723679.C.G	na	na	NoRepeat	0	1352	0	1262	0	1605	146	1401
chr6.162800775.T.G	na	na	NoRepeat	0	2303	1352	2299	106	801	263	1623
chr14.107000553.G.A	na	na	NoRepeat	0	820	0	921	0	752	94	848
chr17.32934396.G.A	na	na	NoRepeat	0	627	0	485	0	402	62	447
chr3.14343631.A.T	na	na	NoRepeat	0	852	0	782	0	546	110	757
chr8.72617240.G.A	na	na	chr8_72617137_72617400	0	1424	0	2116	1	1901	129	1775
chr12.90702406.A.G	na	na	NoRepeat	0	796	1	686	2	744	104	710
chr6.165750998.A.G	na	na	NoRepeat	0	405	5	395	49	364	40	316
chr4.129527185.C.G	na	na	V$OCT1_06	1	1604	0	1608	1	902	152	1444
chr1.245067155.T.A	na	na	NoRepeat	0	463	0	541	0	432	64	431
chr16.89934900.G.A	na	na	NoRepeat	0	474	3	410	58	361	76	420
chr3.82198286.C.T	na	na	NoRepeat	0	888	8	514	71	625	81	570
chr2.235134511.G.A	na	na	NoRepeat	0	918	0	768	0	694	77	724
chr2.19745105.G.A	na	na	NoRepeat	0	471	132	511	236	891	237	956
chr9.11872402.C.A	na	na	NoRepeat	1	1800	0	1849	0	410	248	1865
chr6.48557577.A.T	na	na	NoRepeat	1	1718	386	1675	650	2331	615	1919
chr2.200391947.A.T	na	na	NoRepeat	0	929	0	881	0	856	203	928
chr18.68871259.T.C	na	na	NoRepeat	0	1527	3	1109	162	1153	173	968
chr6.82848807.A.G	na	na	NoRepeat	0	648	2	433	51	456	85	477
chr9.128836694.C.T	na	na	NoRepeat	2	830	501	786	68	113	426	857
chr6.94305858.C.G	na	na	NoRepeat	0	966	0	521	2	602	74	569
chr6.56199433.C.T	na	na	NoRepeat	0	1031	269	2537	351	3130	357	3069
chr7.134192434.G.T	na	na	NoRepeat	1	554	0	649	0	574	77	529
chr14.44685147.C.T	na	na	NoRepeat	0	904	188	713	185	655	194	680
chr3.139728021.A.G	na	na	NoRepeat	0	1477	620	1208	193	455	644	1376
chr3.126803220.T.A	na	na	NoRepeat	0	140	0	144	0	115	19	122
chr13.111826839.T.C	na	na	NoRepeat	0	848	0	637	0	541	71	614
chr2.172583819.A.G	na	na	chr2_172583760_172583906	1	880	0	613	0	814	73	637
chr12.34371625.C.T	na	na	CpG_SYT10_778874	1	1650	0	1162	0	346	186	1334
chr11.24411380.G.A	na	na	NoRepeat	0	503	0	397	0	492	42	449
chr7.57372821.G.A	na	na	NoRepeat	1	680	4	586	67	538	1	673
chr3.123014272.T.A	na	na	NoRepeat	0	354	0	362	0	183	39	248
chr2.230314002.T.A	na	na	NoRepeat	0	1535	0	1521	0	417	367	1515
chr1.7409219.C.T	na	na	chr1_7409198_7409329	0	894	240	1053	159	666	172	928
chr3.68196677.C.G	na	na	NoRepeat	1	1497	0	1341	0	521	217	1435
chr11.40838839.A.T	na	na	NoRepeat	1	682	0	577	1	656	65	568
chr7.153320874.C.G	na	na	NoRepeat	0	1693	577	1641	261	641	520	1488
chr1.6172802.G.A	na	na	NoRepeat	0	89	0	88	0	86	32	107
chr4.137693264.T.A	na	na	NoRepeat	0	727	0	648	0	789	58	547
chr7.53292492.G.A	na	na	NoRepeat	0	1022	2	1017	51	978	208	1067
chr7.131593905.G.T	na	na	NoRepeat	0	842	0	664	0	553	68	585
chr10.11152783.C.A	na	na	NoRepeat	0	118	0	73	0	103	14	121
chr1.108143900.C.T	na	na	chr1_108143788_108143915	0	989	0	1076	0	1208	133	1312
chr6.101690500.C.T	na	na	NoRepeat	0	970	0	408	0	469	93	496
chr1.31791353.C.T	na	na	NoRepeat	0	977	0	956	0	758	112	902
chr10.130352196.T.A	na	na	NoRepeat	0	1479	1	1146	0	648	212	1379
chrX.75207265.T.G	na	na	NoRepeat	0	622	5	533	220	911	195	622
chr2.121551162.C.T	na	na	chr2_121551071_121551194	0	599	1	595	0	466	100	471
chr11.12541155.A.G	na	na	NoRepeat	0	794	0	731	0	579	129	635
chr5.158501233.G.T	na	na	NoRepeat	0	1319	0	1358	0	1102	87	1115
chr15.29518773.C.G	na	na	NoRepeat	0	735	1	750	57	652	0	712
chr22.25334385.G.C	na	na	NoRepeat	0	1004	0	1335	1	1215	93	1593
chr18.47678317.A.T	na	na	NoRepeat	0	591	0	398	0	345	82	381
chr10.125595304.T.A	na	na	NoRepeat	0	820	0	488	0	397	71	583
chr17.9335124.C.T	na	na	NoRepeat	0	550	171	895	122	790	206	1078
chr5.101658643.A.G	na	na	NoRepeat	0	2392	823	2019	481	1371	934	2578
chr17.19720736.G.T	na	na	NoRepeat	2	1453	2	2148	1	2753	340	3419
chr6.97355357.A.T	na	na	NoRepeat	0	1903	0	1313	0	1330	86	1296
chr5.150020578.G.A	na	na	NoRepeat	0	834	0	881	0	503	33	665
chr12.73599744.C.T	na	na	NoRepeat	0	513	4	400	0	452	56	438
chr2.221030310.A.T	na	na	NoRepeat	0	539	0	515	0	532	104	544
chr11.87381646.G.A	na	na	NoRepeat	0	1045	0	935	0	1050	89	826
chr18.19206408.A.T	na	na	NoRepeat	0	708	0	588	0	564	73	620
chr16.50801456.A.T	na	na	NoRepeat	0	1179	0	954	0	1167	79	1030
chr7.54512878.G.T	na	na	NoRepeat	1	949	1	890	0	855	91	1079
chr2.83218700.G.T	na	na	NoRepeat	1	473	0	388	0	567	32	513
chr17.47337197.C.G	na	na	NoRepeat	0	590	0	657	0	468	66	535
chr11.105186814.G.T	na	na	NoRepeat	1	662	0	468	0	516	62	484
chr11.115161922.G.A	na	na	chr11_115161898_115161997	0	2021	11	1465	146	1604	0	1441
chr7.104156222.G.C	na	na	NoRepeat	0	2822	832	3263	340	1583	809	2609
chr7.50362651.G.T	na	na	NoRepeat	0	734	0	523	0	519	36	558
chr4.67783852.G.T	na	na	NoRepeat	2	2155	3	2127	0	1074	226	2048
chr2.74791363.T.C	na	na	NoRepeat	0	1312	0	1255	1	1109	127	1053
chr5.14658078.T.A	na	na	NoRepeat	0	806	3	793	59	781	84	781
chrX.4040616.G.C	na	na	NoRepeat	0	544	80	294	64	239	117	300
chr9.105417941.A.G	na	na	NoRepeat	0	845	2	504	66	630	6	591
chr8.84715090.C.T	na	na	NoRepeat	0	717	265	779	173	886	204	793
chr1.177487421.A.C	na	na	NoRepeat	0	1600	0	1210	0	846	182	1642
chr7.88945456.T.A	na	na	NoRepeat	0	727	0	630	0	741	79	568
chr17.31841391.C.T	na	na	NoRepeat	0	791	0	769	0	658	94	655
chr8.4075559.T.A	na	na	NoRepeat	1	1370	9	1153	253	1110	99	1048
chr5.72685075.T.A	na	na	NoRepeat	0	452	1	473	0	532	68	565
chr14.83593947.G.T	na	na	NoRepeat	0	913	0	806	0	785	65	818
chr13.79780935.G.A	na	na	NoRepeat	0	1071	265	538	277	611	348	725
chrX.104812828.A.T	na	na	NoRepeat	0	1006	0	817	2	966	224	744
chr5.167770165.G.C	na	na	NoRepeat	0	1081	0	1530	0	1035	85	1264
chr4.67857686.T.G	na	na	NoRepeat	0	691	1	493	131	681	68	525
chr10.108901367.C.T	na	na	chr10_108901375_108901523	1	1838	4	1570	1	599	253	1603
chr2.59181493.G.A	na	na	chr2_59181024_59181609	0	999	1	771	0	1036	100	921
chr14.63070793.C.A	na	na	NoRepeat	0	979	0	848	0	779	82	793
chr5.81092183.C.A	na	na	NoRepeat	1	979	4	969	54	894	58	1010
chr5.117117440.T.G	na	na	NoRepeat	0	658	0	544	0	653	42	560
chr3.157682690.G.T	na	na	chr3_157682502_157682785	0	793	0	588	2	899	58	923
chr13.94065547.G.A	na	na	NoRepeat	0	1018	0	633	0	688	82	684
chr17.51998122.T.A	na	na	NoRepeat	0	2072	0	1689	0	781	226	1740
chr2.121365208.C.T	na	na	NoRepeat	0	305	189	318	117	212	121	250
chr14.86902968.A.G	na	na	NoRepeat	0	816	2	834	83	874	53	769
chrX.130179981.C.A	na	na	chrX_130179807_130180258	0	606	0	575	0	200	130	575
chr4.126879496.T.G	na	na	NoRepeat	1	1190	1	1259	0	692	177	1102
chr2.127085769.T.A	na	na	NoRepeat	0	1765	0	1412	2	761	354	1292
chr8.78420917.T.C	na	na	NoRepeat	0	676	0	826	0	1010	67	720
chr14.79272242.A.T	na	na	NoRepeat	0	1349	0	806	0	866	154	903
chr20.59715402.T.A	na	na	NoRepeat	0	815	1	1088	0	871	73	832
chr7.68608555.C.T	na	na	NoRepeat	1	1195	390	940	350	784	365	955
chr2.51261643.C.T	na	na	NoRepeat	1	997	2	559	86	511	76	401
chrX.36070565.T.A	na	na	NoRepeat	0	569	0	346	0	458	106	423
chr6.70000695.T.C	na	na	NoRepeat	0	863	3	1125	110	961	127	836
chrX.146421920.C.A	na	na	NoRepeat	1	649	0	371	0	550	88	399
chr1.31150893.G.T	na	na	NoRepeat	0	1205	0	1418	52	419	291	1232
chr8.26874143.C.A	na	na	NoRepeat	0	628	0	612	45	442	0	432
chr2.42192784.C.T	na	na	NoRepeat	0	471	0	640	0	693	117	626
chr13.101115317.G.T	na	na	NoRepeat	0	598	0	398	0	507	83	537
chr11.88604886.T.C	na	na	NoRepeat	0	1436	10	912	106	1300	134	938
chr6.105876976.C.T	na	na	NoRepeat	4	1621	9	1029	116	1004	210	1153
chr3.192301825.C.T	na	na	NoRepeat	0	813	190	714	225	713	107	524
chr1.173080161.C.T	na	na	NoRepeat	1	976	0	908	1	922	111	958
chr13.34948976.A.G	na	na	NoRepeat	1	1282	0	690	0	705	97	821
chr16.27230235.G.T	na	na	NoRepeat	0	452	0	323	0	273	56	333
chr16.52777039.G.C	na	na	NoRepeat	0	1395	3	1357	0	1261	157	1357
chr2.64882907.C.T	na	na	NoRepeat	0	1012	13	675	234	902	255	900
chr11.33385696.C.T	na	na	NoRepeat	0	1770	1	1396	132	1050	166	1321
chr1.248179364.A.C	na	na	NoRepeat	1	938	242	483	209	550	227	509
chr8.85294329.C.A	na	na	NoRepeat	1	1007	389	1365	325	1756	277	1169
chr6.102094225.G.A	na	na	NoRepeat	0	797	0	497	0	526	63	531
chr3.176770081.A.C	na	na	NoRepeat	0	1043	0	941	0	1252	87	1171
chr13.111859904.G.C	na	na	NoRepeat	0	892	0	682	0	855	92	748
chr12.75382365.C.A	na	na	NoRepeat	1	902	215	451	286	625	324	620
chr10.102857194.G.A	na	na	chr10_102857023_102857355	1	503	204	424	135	340	148	345
chr2.215637450.T.A	na	na	chr2_215637376_215637621	0	2072	2	1865	0	951	511	2223
chr3.63418018.T.C	na	na	NoRepeat	0	1223	0	944	0	913	93	749
chr2.209577479.G.A	na	na	NoRepeat	0	1053	2	814	116	1003	479	1140
chr5.12909250.G.T	na	na	NoRepeat	0	1029	1	1078	1	1239	125	1135
chr2.214381255.C.A	na	na	NoRepeat	0	626	0	404	0	490	56	507
chr13.72805265.C.A	na	na	NoRepeat	1	1234	0	617	0	885	105	814
chr15.62762551.C.T	na	na	NoRepeat	1	851	1	1053	1	661	83	634
chr5.50883467.C.T	na	na	NoRepeat	0	1167	155	763	295	1113	316	1165
chr5.20662263.T.C	na	na	NoRepeat	0	1009	0	873	0	1003	92	1051
chr4.30827771.C.T	na	na	NoRepeat	0	1034	4	1216	86	1091	87	949
chr2.160147568.G.A	na	na	NoRepeat	0	906	0	707	0	761	164	656
chr4.60872523.C.T	na	na	NoRepeat	0	1600	566	1755	167	563	338	1346
chr20.46280828.C.A	na	na	NoRepeat	1	961	0	1446	1	1039	126	1371
chr10.87198131.T.A	na	na	NoRepeat	1	1075	0	791	0	633	81	567
chr5.138604170.A.T	na	na	V$STAT3_01	1	1659	1	2161	0	1487	164	1582
chr11.812934.A.G	na	na	NoRepeat	1	723	0	693	0	446	53	493
chrX.55961364.A.C	na	na	NoRepeat	0	618	0	596	118	861	0	811
chr5.103083117.C.G	na	na	NoRepeat	0	638	116	566	190	619	215	609
chr4.166854948.T.G	na	na	NoRepeat	0	955	0	919	0	1090	48	911
chr8.32040381.C.G	na	na	NoRepeat	0	804	1	622	123	602	6	504
chr6.117682343.C.A	na	na	NoRepeat	0	756	61	503	129	534	168	507
chr5.89936353.C.G	na	na	NoRepeat	0	691	0	544	0	670	60	689
chr10.58232613.G.C	na	na	NoRepeat	0	1594	0	763	0	1064	144	813
chr7.38440758.T.C	na	na	NoRepeat	0	1078	0	988	0	1230	83	1559
chr12.61479683.A.T	na	na	NoRepeat	0	1542	4	1271	52	407	150	1476
chr13.88176280.G.A	na	na	NoRepeat	0	491	0	395	0	482	36	388
chr12.61217076.T.A	na	na	NoRepeat	0	1293	0	878	0	1068	111	866
chr13.57633172.G.A	na	na	NoRepeat	1	728	5	499	159	663	150	527
chr22.18587884.A.G	na	na	NoRepeat	0	676	0	674	0	666	127	710
chr7.4468658.C.A	na	na	NoRepeat	0	858	14	1012	269	1644	194	1859
chr10.31386129.C.T	na	na	NoRepeat	0	795	0	535	73	486	99	595
chr9.12350611.C.A	na	na	NoRepeat	0	1541	1	1278	0	1185	192	1294
chr4.63366780.G.C	na	na	NoRepeat	0	970	6	1026	95	1106	157	958
chr15.34802244.C.T	na	na	NoRepeat	1	597	1	710	40	573	44	386
chr2.4954569.C.A	na	na	NoRepeat	0	1158	0	1332	0	1580	116	1349
chr18.37170754.T.A	na	na	NoRepeat	0	1534	1	1135	0	1065	152	985
chr20.53686008.T.A	na	na	NoRepeat	0	1361	499	1418	561	1329	447	1360
chr9.106139820.T.C	na	na	NoRepeat	1	752	0	562	0	548	47	573
chr8.110724137.G.A	na	na	NoRepeat	0	415	6	715	99	642	82	471
chr4.134130192.C.T	na	na	NoRepeat	0	810	1	671	1	838	80	613
chr6.104200175.G.C	na	na	NoRepeat	0	625	0	363	0	432	59	410
chr5.82451996.G.C	na	na	NoRepeat	0	1116	1	1061	0	1177	86	1203
chr5.148693620.C.A	na	na	NoRepeat	0	1270	11	1467	44	450	199	1362
chr1.154592072.T.C	na	na	NoRepeat	1	901	1	806	1	497	109	797
chr4.126696457.G.C	na	na	NoRepeat	0	423	6	436	46	437	51	349
chr2.122758079.G.A	na	na	NoRepeat	0	943	0	852	0	808	199	694
chr7.146267623.T.G	na	na	NoRepeat	0	1150	421	1117	132	402	299	1151
chr9.81986100.T.C	na	na	NoRepeat	2	1801	3	1524	166	1543	226	1266
chr1.115837838.G.A	na	na	NoRepeat	0	611	2	678	70	557	63	592
chr11.23032279.G.A	na	na	NoRepeat	0	414	1	339	0	375	65	461
chr1.73095514.T.C	na	na	NoRepeat	0	1590	0	1801	0	665	179	1771
chr2.156619001.T.A	na	na	NoRepeat	1	784	0	480	61	601	78	489
chr8.82145695.G.A	na	na	NoRepeat	0	596	1	755	1	788	53	772
chr6.97115020.G.T	na	na	NoRepeat	1	848	0	535	70	607	72	498
chr11.69624224.C.T	na	na	NoRepeat	0	386	0	424	0	339	59	384
chr9.10567403.A.C	na	na	NoRepeat	0	830	0	684	0	558	38	530
chr17.12750117.C.T	na	na	NoRepeat	0	953	190	1999	234	1899	276	2191
chr4.20797435.C.G	na	na	NoRepeat	0	1321	0	1220	0	1200	138	1164
chr8.6779309.C.T	na	na	NoRepeat	5	2481	934	2863	115	1133	1058	2423
chrX.63070730.G.A	na	na	NoRepeat	0	510	11	599	69	431	95	472
chr5.117283990.A.T	na	na	NoRepeat	0	729	0	713	0	651	59	590
chr3.79357899.T.G	na	na	NoRepeat	0	759	0	403	0	555	72	504
chr11.106220780.T.G	na	na	NoRepeat	0	1314	138	711	257	1022	323	975
chr14.70052570.C.T	na	na	NoRepeat	0	952	0	1671	0	1099	74	1164
chr1.68611384.T.C	na	na	NoRepeat	1	623	0	741	0	607	91	716
chr8.85769677.A.T	na	na	NoRepeat	0	647	0	1089	0	976	62	813
chr4.29572450.T.A	na	na	NoRepeat	0	870	0	893	0	1075	75	791
chr10.115257894.T.C	na	na	NoRepeat	0	670	2	618	0	334	210	691
chr6.26988833.T.C	na	na	NoRepeat	0	1166	5	610	71	860	77	815
chr6.120627035.T.A	na	na	NoRepeat	0	1270	0	889	0	455	155	993
chr4.9814659.C.A	na	na	NoRepeat	0	992	0	1127	0	947	72	919
chr4.63565408.G.A	na	na	NoRepeat	1	1807	476	1658	270	976	406	1492
chr4.146124758.G.C	na	na	chr4_146124674_146124852	0	1715	0	2173	0	576	221	1783
chr6.8069190.A.T	na	na	NoRepeat	0	2317	1262	2131	516	867	1241	2132
chr7.142329284.A.T	na	na	NoRepeat	0	1249	1	1327	0	1203	142	1188
chr1.153327520.T.C	na	na	NoRepeat	0	1597	0	1617	0	579	252	1625
chr8.856790.T.G	na	na	NoRepeat	0	169	0	173	0	148	12	184
chr11.33511776.G.T	na	na	NoRepeat	3	1305	1	1227	1	944	160	1255
chr1.47677883.G.T	na	na	NoRepeat	1	437	0	462	0	328	41	394
chr4.183033918.G.A	na	na	V$OCT1_07	2	1253	226	1033	260	906	246	756
chr1.169199764.T.A	na	na	NoRepeat	0	920	0	713	0	933	68	835
chr12.5896430.G.A	na	na	NoRepeat	2	1206	23	1585	184	1306	224	1464
chr6.161028111.T.C	na	na	NoRepeat	1	1013	0	1418	0	863	154	868
chr4.84889228.T.A	na	na	NoRepeat	0	1050	221	982	123	497	256	921
chr11.59664916.C.T	na	na	NoRepeat	1	874	0	455	0	533	79	521
chr2.192318512.T.A	na	na	NoRepeat	0	1046	0	638	2	701	155	804
chr2.29970929.C.T	na	na	NoRepeat	0	738	8	770	89	851	132	1039
chr1.74537763.G.A	na	na	NoRepeat	0	1012	1	1063	1	1253	116	1047
chr9.14256950.C.A	na	na	NoRepeat	0	742	0	608	0	444	74	567
chr6.25755806.C.A	na	na	NoRepeat	0	3671	0	2571	251	2766	0	2758
chr12.30183681.A.T	na	na	NoRepeat	0	959	0	528	0	598	58	687
chr12.6579181.G.A	na	na	chr12_6579117_6579260	0	479	14	576	103	415	119	475
chr9.28736328.C.G	na	na	NoRepeat	0	1727	0	1702	0	661	244	1427
chr10.59496518.A.G	na	na	NoRepeat	0	878	0	559	0	600	67	456
chr2.18666873.G.C	na	na	NoRepeat	0	757	10	635	89	813	168	863
chr5.67354277.G.A	na	na	NoRepeat	0	1184	0	1197	0	1288	127	1284
chr9.122256503.A.G	na	na	NoRepeat	0	1889	0	1386	1	1431	180	1526
chr8.13554250.C.A	na	na	NoRepeat	0	1121	6	964	96	961	111	953
chr1.96136081.T.G	na	na	NoRepeat	0	753	0	822	0	783	62	731
chr11.121329762.G.A	na	na	NoRepeat	0	794	0	640	0	604	47	670
chr16.85869401.T.A	na	na	NoRepeat	0	134	1	79	25	109	20	118
chr14.42905590.T.G	na	na	NoRepeat	1	783	301	853	557	1197	285	783
chr3.102373989.A.G	na	na	NoRepeat	0	880	7	676	60	605	88	553
chr13.69690456.A.T	na	na	NoRepeat	0	658	1	423	71	559	60	446
chr4.61390421.C.A	na	na	NoRepeat	0	1599	611	1796	157	548	366	1362
chr7.142746301.G.T	na	na	NoRepeat	1	1055	0	1059	0	969	115	939
chr5.166914643.T.A	na	na	NoRepeat	0	3525	0	3165	0	2775	367	3059
chr1.103046204.A.G	na	na	NoRepeat	0	617	0	692	1	783	58	788
chr5.141210761.C.A	na	na	NoRepeat	0	985	1	1176	0	765	126	855
chr3.162898998.A.T	na	na	NoRepeat	0	821	265	541	653	983	551	811
chr15.55176997.G.A	na	na	NoRepeat	0	1196	0	1062	1	869	111	696
chr9.81000033.T.C	na	na	NoRepeat	0	793	0	598	0	498	65	449
chr7.126081492.A.C	na	na	NoRepeat	0	1884	475	1907	158	794	488	1588
chr2.142646476.C.A	na	na	NoRepeat	2	2531	1026	1770	536	1069	969	1805
chr12.120179512.G.A	na	na	NoRepeat	1	828	0	594	1	665	76	651
chr5.45044244.G.A	na	na	NoRepeat	1	1950	0	1501	0	1857	194	1877
chr7.153765177.C.A	na	na	NoRepeat	1	567	2	721	42	617	0	580
chr18.55907217.G.A	na	na	NoRepeat	0	819	0	633	0	446	98	466
chr15.27902786.G.T	na	na	NoRepeat	0	695	0	729	0	629	76	598
chr17.55314144.C.T	na	na	NoRepeat	0	1300	1	987	0	890	112	971
chr2.185397202.A.T	na	na	NoRepeat	0	544	0	392	0	506	79	377
chr8.55348292.G.T	na	na	NoRepeat	0	577	1	751	2	823	56	796
chr4.5798346.A.G	na	na	NoRepeat	0	451	0	499	0	362	29	396
chr16.51641701.T.C	na	na	NoRepeat	0	701	6	686	64	640	82	703
chr11.58000360.A.C	na	na	NoRepeat	1	959	1	529	81	599	90	570
chr3.176208791.C.A	na	na	NoRepeat	1	1106	10	839	329	1205	378	1242
chr3.160585360.G.A	na	na	NoRepeat	0	700	0	546	1	847	58	833
chr1.69261342.G.A	na	na	NoRepeat	0	1000	2	999	0	953	114	1036
chr9.30621802.T.A	na	na	NoRepeat	0	703	0	624	0	588	52	449
chr21.22655689.T.C	na	na	NoRepeat	0	653	2	615	59	688	50	586
chr2.83115719.T.A	na	na	NoRepeat	1	1556	3	811	103	1146	98	1063
chr9.132003760.A.T	na	na	NoRepeat	0	1558	0	1649	0	238	457	1615
chr7.111808222.C.A	na	na	NoRepeat	0	930	0	852	0	768	97	749
chr1.69066704.C.T	na	na	NoRepeat	0	1110	222	929	305	996	305	1036
chr5.59288815.T.A	na	na	NoRepeat	1	790	171	749	216	950	282	882
chr8.65986302.T.G	na	na	NoRepeat	0	702	3	957	120	1007	173	850
chr2.166839628.C.T	na	na	NoRepeat	3	1946	980	1749	332	591	920	1777
chr5.20540260.C.A	na	na	NoRepeat	0	741	0	674	0	820	97	800
chr14.21523949.C.T	na	na	NoRepeat	1	1190	0	1428	0	1009	97	1165
chr18.63957779.G.A	na	na	NoRepeat	0	1142	0	705	0	800	83	614
chr7.57227856.A.C	na	na	NoRepeat	0	1551	740	1274	357	594	1008	1696
chr10.55187599.T.C	na	na	NoRepeat	0	1114	0	488	0	753	89	591
chr8.4152424.G.A	na	na	NoRepeat	0	655	0	531	0	578	80	527
chr13.48558292.G.T	na	na	NoRepeat	0	1056	0	469	0	683	93	744
chr8.69983491.A.G	na	na	chr8_69983423_69983654	0	556	0	846	0	806	71	698
chr3.76170967.C.A	na	na	chr3_76170465_76170957	1	1766	6	1401	136	592	309	1420
chr8.35997394.T.A	na	na	NoRepeat	0	1008	0	801	0	910	94	751
chr8.133463685.C.T	na	na	NoRepeat	2	1142	488	2111	306	1540	421	1469
chr1.177782845.G.A	na	na	NoRepeat	0	776	4	687	68	725	0	701
chr6.120832467.A.T	na	na	NoRepeat	0	533	0	447	0	418	52	424
chr12.99422551.A.C	na	na	NoRepeat	2	2795	1140	2184	541	1133	1224	2462
chr12.101142753.G.A	na	na	NoRepeat	1	2797	10	2278	92	1084	299	2435
chr7.82108774.T.G	na	na	NoRepeat	0	706	136	559	108	539	153	513
chr1.208849609.A.C	na	na	NoRepeat	0	988	0	774	0	1089	102	765
chr19.28615072.T.A	na	na	NoRepeat	0	951	0	716	0	600	88	639
chr10.8789353.T.A	na	na	NoRepeat	1	574	0	329	0	422	41	402
chr11.25171359.T.C	na	na	NoRepeat	0	2022	4	973	140	1168	165	1338
chr6.130666055.G.T	na	na	NoRepeat	2	1171	0	820	0	705	151	879
chr20.25667235.C.G	na	na	NoRepeat	0	475	2	260	60	283	86	310
chr20.35548459.C.A	na	na	NoRepeat	0	648	0	1075	0	745	76	781
chr11.132928953.T.A	na	na	NoRepeat	0	1949	262	1569	176	665	796	2061
chrX.84914099.A.G	na	na	NoRepeat	0	1435	707	1315	558	1024	613	1309
chr13.60016070.G.T	na	na	NoRepeat	0	2030	13	1566	114	957	227	1898
chr6.17626465.C.A	na	na	NoRepeat	0	1055	0	717	0	732	74	725
chr2.146202538.G.A	na	na	NoRepeat	0	1555	0	954	1	1158	146	938
chr5.115997985.C.A	na	na	NoRepeat	1	650	3	685	57	580	66	650
chr2.22722014.G.T	na	na	NoRepeat	1	1166	0	1133	1	1328	204	1096
chr2.222369160.G.A	na	na	NoRepeat	0	1129	2	1053	128	1154	218	1045
chr6.153103697.G.C	na	na	NoRepeat	0	1229	0	895	0	879	125	738
chr17.32335548.G.T	na	na	NoRepeat	0	1468	0	1173	1	1149	62	1096
chr1.34210972.A.C	na	na	NoRepeat	0	232	29	276	0	189	0	259
chr2.193836484.G.T	na	na	NoRepeat	0	786	2	477	69	733	101	659
chr16.62648779.C.T	na	na	NoRepeat	0	1044	1	1171	0	1022	111	951
chr15.64383780.T.A	na	na	NoRepeat	0	1418	0	1927	0	1449	146	1253
chr13.34687583.C.A	na	na	NoRepeat	1	2255	0	1302	0	1473	75	1531
chr1.43789208.C.T	na	na	NoRepeat	1	869	1	909	0	626	106	875
chr1.115044781.T.C	na	na	NoRepeat	0	1782	1	1748	145	1803	183	1998
chr10.49860477.C.A	na	na	chr10_49860267_49860501	0	1228	11	718	68	542	109	684
chr1.73508909.A.T	na	na	NoRepeat	0	715	1	507	0	657	65	636
chr8.84520778.C.T	na	na	NoRepeat	0	1673	0	1540	0	1701	125	1551
chr15.68501418.C.T	na	na	NoRepeat	0	256	0	398	0	224	61	265
chr8.22841091.C.G	na	na	NoRepeat	0	1250	455	1607	312	727	194	1243
chr10.83244377.T.C	na	na	V$MEF2_04	0	66	6	34	0	38	0	28
chr2.108838017.G.T	na	na	NoRepeat	0	1925	844	1529	428	815	687	1513
chr18.54018766.T.A	na	na	NoRepeat	0	1799	9	1076	264	999	406	1032
chr21.38631665.C.T	na	na	NoRepeat	1	1115	0	1012	0	918	96	1096
chr15.27220675.T.A	na	na	NoRepeat	0	980	0	748	0	661	58	711
chr10.34964856.G.A	na	na	chr10_34964664_34964973	0	1146	1	662	0	334	101	785
chr11.38674838.G.A	na	na	NoRepeat	0	1019	0	683	0	772	77	725
chr2.104665539.G.C	na	na	NoRepeat	1	785	196	936	217	1069	224	1027
chr2.57557755.A.G	na	na	NoRepeat	1	1204	0	656	3	995	94	854
chr7.130043772.A.T	na	na	NoRepeat	0	2419	0	2374	120	1320	275	2022
chr2.44292719.G.T	na	na	chr2_44292557_44293325	0	736	6	692	60	832	72	789
chr21.10507302.T.G	na	na	NoRepeat	0	659	32	611	97	773	116	635
chr3.179623496.A.G	na	na	NoRepeat	0	645	5	538	106	536	136	471
chr8.136030382.C.A	na	na	NoRepeat	1	1418	0	2601	0	1994	150	1618
chr18.49899467.A.T	na	na	NoRepeat	4	843	9	593	89	603	97	474
chr13.45838085.A.G	na	na	chr13_45837891_45838111	0	999	0	550	0	638	41	666
chr14.107209459.T.A	na	na	NoRepeat	0	1212	19	1315	203	1228	261	1170
chr1.191609848.A.C	na	na	NoRepeat	1	871	0	403	0	849	58	624
chr3.140089390.C.A	na	na	NoRepeat	1	1804	510	1094	377	945	547	1180
chr3.80502767.A.G	na	na	NoRepeat	1	694	0	361	0	455	52	459
chr10.15081772.C.T	na	na	NoRepeat	0	2567	0	1412	0	1417	234	1683
chr1.84991016.A.T	na	na	NoRepeat	0	1094	0	1019	0	1032	84	1028
chr6.14704178.G.A	na	na	chr6_14703991_14704196	0	1253	0	1222	1	1190	105	1077
chr11.82070123.G.A	na	na	NoRepeat	0	821	2	666	77	803	83	644
chrX.34804353.A.C	na	na	NoRepeat	0	453	6	364	58	303	82	327
chr10.107872501.T.C	na	na	NoRepeat	0	1279	0	784	0	830	106	1054
chr14.90868414.G.A	na	na	NoRepeat	0	872	0	822	0	659	72	765
chr1.205353706.G.A	na	na	NoRepeat	2	481	23	418	269	512	245	525
chr7.120939176.G.A	na	na	NoRepeat	0	1887	494	2066	188	826	519	1744
chr2.147658361.C.T	na	na	V$BRN2_01	0	1023	3	1051	105	994	0	849
chr11.111504954.G.T	na	na	V$OCT1_06	1	3136	1	2432	0	1581	291	2844
chr4.2540314.C.T	na	na	NoRepeat	0	395	0	473	0	391	54	425
chr3.112845340.G.A	na	na	NoRepeat	0	921	0	578	0	533	103	642
chr12.123881067.G.A	na	na	NoRepeat	0	531	0	407	0	392	49	427
chr2.3750866.G.C	na	na	CpG_RNASEH1_144889	0	22	2	18	14	34	19	27
chr7.85358985.C.G	na	na	NoRepeat	0	1874	1	2015	0	744	182	1654
chr6.46264733.C.T	na	na	NoRepeat	0	1686	414	3673	384	4092	492	4485
chr5.139693422.C.T	na	na	chr5_139693396_139693497	2	1830	0	1920	1	1305	168	1515
chr1.58084856.C.A	na	na	NoRepeat	0	748	253	742	237	689	268	693
chr7.153591239.G.T	na	na	NoRepeat	0	890	0	676	1	683	91	640
chr7.40241295.G.A	na	na	NoRepeat	0	1491	4	1739	20	1985	25	2347
chr14.79347172.C.T	na	na	NoRepeat	0	687	0	394	1	450	48	346
chr20.25668091.C.G	na	na	NoRepeat	0	1074	10	661	243	862	266	739
chr6.143114620.A.G	na	na	NoRepeat	0	1698	6	1343	165	1240	188	1293
chr7.158328428.T.A	na	na	NoRepeat	0	626	0	644	0	528	66	343
chr22.39121891.A.C	na	na	NoRepeat	0	840	3	726	95	701	216	1074
chr18.38336753.T.A	na	na	NoRepeat	0	816	1	505	0	558	73	427
chr4.61319420.C.A	na	na	NoRepeat	1	1717	1	2320	0	763	149	1500
chr11.55242762.A.T	na	na	NoRepeat	0	788	0	663	2	612	71	520
chr18.55798800.T.G	na	na	NoRepeat	0	94	0	40	0	66	4	51
chr5.18945291.A.T	na	na	NoRepeat	0	1403	10	845	80	1190	77	1246
chr4.57131329.G.T	na	na	NoRepeat	0	637	230	802	134	594	109	489
chr3.157532.A.G	na	na	NoRepeat	0	879	0	752	0	817	91	631
chr2.41372177.G.T	na	na	NoRepeat	0	571	0	459	0	805	45	674
chr9.24767738.A.G	na	na	NoRepeat	1	1061	3	890	1	726	110	736
chr10.7429960.C.T	na	na	NoRepeat	0	1016	5	654	76	568	101	661
chr20.35548460.T.C	na	na	NoRepeat	0	648	0	1077	1	739	76	781
chr9.105124591.T.A	na	na	NoRepeat	0	432	0	355	0	388	88	380
chr3.178591298.G.A	na	na	NoRepeat	0	56	7	62	0	52	0	53
chr4.92503635.T.C	na	na	NoRepeat	2	919	4	687	108	1001	1	703
chr5.100067561.C.G	na	na	NoRepeat	0	639	0	574	0	685	66	753
chr10.11267450.C.A	na	na	NoRepeat	0	1460	0	885	0	1014	125	1025
chr9.33034067.G.A	na	na	NoRepeat	0	799	0	829	0	598	93	599
chr10.16194837.G.T	na	na	NoRepeat	0	1244	0	640	1	804	94	663
chr6.19963568.C.G	na	na	NoRepeat	0	1771	0	1656	0	770	155	1633
chr10.18963360.A.G	na	na	NoRepeat	0	657	0	331	1	412	42	356
chr12.8866122.G.A	na	na	NoRepeat	0	1462	3	973	0	714	46	907
chr13.110657815.C.A	na	na	NoRepeat	0	539	2	410	42	442	79	456
chr2.126660854.G.T	na	na	NoRepeat	1	1810	1	1694	0	720	384	1555
chr3.74351650.G.T	na	na	chr3_74351533_74351685	1	1296	543	1079	190	413	661	1280
chr6.79412039.T.C	na	na	NoRepeat	0	2243	0	1525	0	969	203	1629
chr18.43946464.C.T	na	na	NoRepeat	0	552	0	523	1	325	40	326
chr20.54993770.G.T	na	na	NoRepeat	1	1321	0	2114	0	1290	139	1643
chr4.67702636.A.C	na	na	NoRepeat	0	1515	346	1521	231	819	410	1498
chr7.94535363.A.T	na	na	chr7_94535257_94535626	0	1561	0	1761	0	313	306	1701
chr3.26491396.G.A	na	na	NoRepeat	0	660	0	527	1	638	55	456
chr12.51835038.C.A	na	na	NoRepeat	0	1559	0	1397	0	1148	162	1193
chr5.21370818.T.A	na	na	NoRepeat	0	397	0	292	0	440	30	350
chr4.116661491.G.T	na	na	NoRepeat	0	764	0	524	0	689	68	541
chrX.5286976.A.C	na	na	NoRepeat	0	643	0	379	0	451	165	446
chr5.23261017.A.T	na	na	NoRepeat	0	711	1	576	7	644	54	640
chr3.172124479.C.T	na	na	NoRepeat	0	933	0	717	0	948	116	983
chr10.107511916.T.A	na	na	NoRepeat	1	999	273	618	314	729	456	794
chr7.69010129.C.T	na	na	NoRepeat	0	1253	0	1682	0	767	154	1490
chr3.34390429.C.A	na	na	NoRepeat	0	1114	4	663	72	843	90	791
chr2.138607790.G.C	na	na	NoRepeat	0	1134	1	922	0	1163	194	823
chr2.83484207.A.G	na	na	NoRepeat	0	1563	10	1097	121	1658	128	1314
chr11.107614116.G.A	na	na	NoRepeat	2	2080	0	1535	1	839	216	1971
chr4.22907180.T.A	na	na	NoRepeat	0	1142	4	1070	163	879	107	931
chr10.55123080.T.G	na	na	NoRepeat	0	911	0	445	1	604	97	544
chr7.94789628.G.A	na	na	NoRepeat	0	1665	0	1428	0	1697	136	1300
chr1.204655053.C.A	na	na	NoRepeat	0	347	0	268	0	316	47	291
chr14.81890062.G.C	na	na	NoRepeat	0	923	229	1042	140	825	188	884
chr19.31784752.T.A	na	na	NoRepeat	0	1479	0	1432	0	1080	159	997
chr4.163431699.G.T	na	na	NoRepeat	0	1800	2	1801	1	2265	142	1786
chrX.49593787.C.T	na	na	NoRepeat	0	179	0	153	0	176	31	196
chr1.79987300.T.G	na	na	chr1_79987108_79987326	1	1483	0	961	0	1097	129	1241
chr7.107084426.C.T	na	na	NoRepeat	0	2225	502	1967	177	1017	509	1859
chr6.9899604.T.C	na	na	NoRepeat	0	1177	0	843	1	985	83	840
chrX.50895949.T.A	na	na	NoRepeat	0	377	0	325	0	484	74	486
chr18.4208575.A.G	na	na	NoRepeat	0	1915	2	1672	0	1551	207	1723
chr11.50137494.C.G	na	na	NoRepeat	0	502	1	456	45	332	48	345
chr20.59152263.G.C	na	na	NoRepeat	0	271	0	330	31	242	33	252
chr13.110813413.T.C	na	na	NoRepeat	0	1351	3	868	85	762	121	924
chr5.166310337.G.A	na	na	NoRepeat	1	936	8	979	91	848	97	877
chr8.92326191.A.G	na	na	chr8_92326175_92326343	0	1034	0	1517	0	1519	109	1235
chr13.43697294.T.G	na	na	NoRepeat	2	840	10	703	86	580	102	704
chr8.113953863.A.T	na	na	NoRepeat	2	1673	575	2354	499	2649	436	1728
chr14.81365519.T.G	na	na	NoRepeat	0	989	5	720	75	792	162	771
chr20.59653922.C.T	na	na	chr20_59653930_59654111	1	922	2	1365	3	855	67	898
chr19.13590527.G.A	na	na	NoRepeat	0	1100	0	1351	0	1123	135	1181
chr3.131481027.C.T	na	na	NoRepeat	0	1244	0	879	0	985	137	858
chr10.14783218.G.T	na	na	NoRepeat	0	956	203	429	177	426	237	506
chr10.37928341.C.T	na	na	NoRepeat	0	536	0	226	0	253	42	297
chr8.30762802.G.T	na	na	NoRepeat	1	302	12	223	0	237	0	224
chr4.172880906.C.A	na	na	NoRepeat	2	1780	9	1824	149	679	176	1301
chr14.40496906.C.T	na	na	NoRepeat	1	700	1	835	1	1013	78	830
chr22.43047151.C.T	na	na	NoRepeat	0	288	1	447	23	360	36	494
chr10.11204569.G.T	na	na	NoRepeat	3	965	11	621	160	688	210	738
chr6.19963567.T.A	na	na	NoRepeat	0	1761	0	1638	0	760	157	1622
chr13.57661525.C.A	na	na	NoRepeat	2	669	3	428	58	556	66	511
chr2.1563952.G.T	na	na	NoRepeat	0	96	0	146	0	155	17	150
chr1.118370172.C.T	na	na	NoRepeat	0	1509	684	1562	112	370	626	1683
chr7.31535899.C.G	na	na	NoRepeat	0	778	27	738	311	1255	376	1362
chr16.58945120.G.A	na	na	NoRepeat	0	1220	0	1304	0	1022	115	1056
chrX.125360246.C.G	na	na	NoRepeat	0	535	0	434	1	513	69	379
chr12.95341251.C.T	na	na	NoRepeat	1	874	0	820	0	677	121	857
chr12.46863232.G.A	na	na	NoRepeat	0	1431	0	1009	0	875	59	962
chr10.24612458.G.T	na	na	NoRepeat	0	1032	6	738	88	706	122	730
chrX.30998362.T.C	na	na	NoRepeat	0	499	0	466	0	415	105	389
chr7.102530343.G.A	na	na	NoRepeat	1	2098	759	2283	436	1198	496	1811
chr1.201515205.A.T	na	na	chr1_201515026_201515248	0	1504	0	1259	0	487	236	1527
chr1.102322526.G.A	na	na	NoRepeat	0	1616	1	1662	1	1751	141	1655
chr8.31701224.C.A	na	na	NoRepeat	0	923	231	712	90	791	194	599
chr4.130251029.C.T	na	na	NoRepeat	0	1454	333	1537	165	549	302	1448
chr5.118862461.A.G	na	na	NoRepeat	0	1550	221	1250	143	1495	144	1299
chr9.122677762.C.G	na	na	NoRepeat	0	2019	6	1147	129	1261	363	1400
chr16.17921587.A.T	na	na	NoRepeat	0	922	0	889	0	698	101	659
chr10.64929141.G.A	na	na	NoRepeat	1	1038	337	712	265	717	270	623
chr9.73967432.G.C	na	na	NoRepeat	0	1106	0	749	0	835	98	673
chr9.17217050.A.T	na	na	chr9_17217018_17217117	0	1314	1	719	0	805	123	862
chr8.4754681.C.T	na	na	NoRepeat	0	1094	1	925	0	880	104	847
chr18.32368845.G.C	na	na	NoRepeat	0	1098	176	686	186	677	203	632
chr3.89845630.T.A	na	na	NoRepeat	0	898	1	676	0	884	101	797
chr1.195229731.T.A	na	na	NoRepeat	0	710	0	511	0	725	54	506
chr19.22798236.G.A	na	na	NoRepeat	0	449	0	445	0	275	44	324
chr3.83855444.T.G	na	na	NoRepeat	0	657	7	519	87	726	80	561
chr6.120282874.T.A	na	na	NoRepeat	1	707	236	494	232	565	239	481
chr7.115681437.G.A	na	na	NoRepeat	0	1372	0	1714	1	665	148	1429
chr3.37497321.G.A	na	na	NoRepeat	0	693	1	522	61	504	68	490
chr3.168422278.T.G	na	na	NoRepeat	0	957	3	626	81	920	95	911
chr7.85358938.A.T	na	na	NoRepeat	0	1960	0	2136	0	811	222	1845
chr2.155644769.C.A	na	na	NoRepeat	0	1102	514	955	225	460	445	835
chr8.87828919.G.T	na	na	NoRepeat	0	677	1	1274	0	1096	69	904
chr19.41773288.A.G	na	na	NoRepeat	1	2074	0	1637	0	1282	184	1388
chr4.133251511.T.A	na	na	NoRepeat	0	1183	306	1300	127	382	284	1095
chr1.221872922.T.C	na	na	NoRepeat	1	726	0	622	0	484	71	502
chr17.45934905.A.C	na	na	chr17_45934557_45934899	0	807	0	944	0	576	106	710
chr1.233838607.A.T	na	na	NoRepeat	0	1350	2	825	109	666	170	742
chr3.12605889.G.T	na	na	NoRepeat	0	1158	0	584	1	715	109	815
chr8.140271875.C.T	na	na	NoRepeat	0	744	1	1457	1	1021	87	908
chr2.116919848.A.G	na	na	NoRepeat	0	827	0	660	0	724	73	624
chr2.182641348.A.T	na	na	NoRepeat	0	1560	0	1725	0	728	446	1568
chr7.131767223.G.T	na	na	NoRepeat	0	532	0	618	0	523	70	483
chr1.47233749.G.A	na	na	NoRepeat	0	805	3	824	64	631	86	674
chr3.65510740.C.A	na	na	NoRepeat	0	1600	1	921	0	1080	121	1072
chr4.14039730.A.T	na	na	NoRepeat	0	1342	0	1468	0	1261	119	1198
chr14.47404494.G.A	na	na	NoRepeat	1	1120	389	1127	333	1073	294	1038
chr4.131614076.T.A	na	na	NoRepeat	1	1803	0	1448	1	1880	125	1333
chr13.107948379.G.T	na	na	NoRepeat	0	626	0	425	1	505	66	432
chr1.247621052.G.T	na	na	NoRepeat	1	699	1	589	1	518	83	534
chr10.133584505.G.C	na	na	NoRepeat	0	183	0	210	0	130	30	184
chr6.147068144.T.A	na	na	NoRepeat	0	664	0	668	0	628	71	476
chr6.140077805.A.T	na	na	NoRepeat	0	1509	3	1485	0	1275	140	1205
chr2.175265970.C.T	na	na	NoRepeat	0	1130	0	711	0	903	119	819
chr10.22710414.A.T	na	na	NoRepeat	0	500	0	346	0	354	70	383
chr4.71057382.C.A	na	na	NoRepeat	1	870	0	750	0	869	46	651
chr7.125504396.G.T	na	na	NoRepeat	0	1224	0	1218	0	1398	166	1013
chr15.70540492.T.A	na	na	NoRepeat	1	738	0	922	0	655	89	876
chr19.22685407.C.A	na	na	NoRepeat	0	719	0	586	0	149	129	532
chr4.20481321.T.C	na	na	NoRepeat	0	585	0	578	0	606	44	543
chr1.14272968.C.T	na	na	NoRepeat	0	793	0	793	57	650	74	766
chr8.63806708.G.A	na	na	NoRepeat	1	1225	0	2006	1	1998	128	1520
chr4.84851972.G.T	na	na	chr4_84851868_84852009	0	1478	0	1474	1	871	163	1315
chr5.110974215.T.G	na	na	NoRepeat	0	968	5	964	156	868	182	925
chr2.172059463.G.T	na	na	NoRepeat	0	1108	3	1098	77	920	105	860
chr2.2051311.C.A	na	na	NoRepeat	2	558	4	562	92	618	116	557
chr4.181976790.A.G	na	na	NoRepeat	0	865	142	730	233	830	143	479
chrX.123501368.C.A	na	na	NoRepeat	1	618	0	510	90	573	0	511
chr3.190012030.C.T	na	na	NoRepeat	0	1053	0	885	3	1243	105	786
chr1.239161863.G.T	na	na	NoRepeat	0	871	0	569	1	677	46	551
chr13.89119651.T.C	na	na	NoRepeat	0	404	0	263	0	324	40	320
chr8.103742003.A.T	na	na	NoRepeat	0	1762	0	3045	0	2198	151	1917
chr2.63887801.C.T	na	na	NoRepeat	0	1164	0	998	0	1226	83	1068
chr11.123649230.T.G	na	na	NoRepeat	1	624	0	435	0	570	61	537
chr12.133126902.G.T	na	na	NoRepeat	0	392	155	307	17	36	193	322
chr18.41649528.T.A	na	na	NoRepeat	0	971	0	662	0	789	109	676
chrX.149262286.C.A	na	na	NoRepeat	0	899	1	868	0	553	188	734
chr5.165854794.A.T	na	na	NoRepeat	0	904	0	820	1	813	95	833
chr3.101136945.T.C	na	na	NoRepeat	1	885	0	476	0	497	62	548
chr4.11937444.T.A	na	na	NoRepeat	0	1672	890	1897	204	876	400	1690
chr4.85195930.T.C	na	na	NoRepeat	1	2857	486	2544	465	1774	608	2323
chr11.56125647.C.T	na	na	chr11_56124752_56125755	0	476	0	291	0	358	45	315
chr15.66375538.C.T	na	na	NoRepeat	0	1151	1	1161	1	905	115	787
chr9.10566463.G.T	na	na	NoRepeat	0	1220	1	956	0	727	117	726
chr7.103195763.G.T	na	na	NoRepeat	0	725	4	729	79	766	0	580
chr4.167553128.C.A	na	na	NoRepeat	0	1022	1	697	0	1031	83	869
chr3.55038148.C.T	na	na	NoRepeat	0	2488	3	2124	1	1907	235	2075
chr18.26455868.C.A	na	na	NoRepeat	0	1212	1	718	0	659	87	536
chr10.63453750.A.T	na	na	NoRepeat	0	1038	0	844	0	855	132	693
chr12.83842614.C.T	na	na	NoRepeat	0	1074	1	750	1	501	143	1040
chrX.25398557.G.A	na	na	NoRepeat	0	642	0	419	1	414	128	382
chr5.7394146.C.T	na	na	NoRepeat	0	316	0	243	0	314	23	312
chr7.68260610.G.T	na	na	NoRepeat	0	1792	782	2179	377	909	650	2031
chr13.93366715.G.A	na	na	NoRepeat	0	1093	288	630	414	879	443	807
chr5.8303518.A.G	na	na	NoRepeat	0	640	0	487	0	614	53	595
chr5.62970959.G.A	na	na	chr5_62970865_62971001	0	1230	1	892	1	1145	85	1075
chr12.39555479.G.A	na	na	NoRepeat	0	1303	0	1121	0	1068	145	1021
chr14.42023642.G.A	na	na	NoRepeat	0	638	204	650	162	830	171	622
chr21.24129656.T.A	na	na	NoRepeat	0	773	0	724	0	758	55	605
chr1.107334479.A.T	na	na	NoRepeat	0	1222	0	1206	0	1271	96	1319
chr12.67479180.C.G	na	na	NoRepeat	0	621	0	519	0	477	47	532
chr12.45110810.C.A	na	na	NoRepeat	1	913	0	664	0	766	93	707
chr20.2005408.C.T	na	na	NoRepeat	0	1175	0	708	0	698	123	799
chr3.197844199.A.G	na	na	NoRepeat	0	115	19	92	0	39	0	125
chr12.99046963.T.C	na	na	NoRepeat	1	910	0	553	0	594	75	624
chr3.180976559.G.T	na	na	NoRepeat	0	985	233	819	186	758	160	661
chr5.27022121.G.A	na	na	NoRepeat	1	987	0	882	0	956	60	776
chr15.97245778.C.G	na	na	NoRepeat	1	1445	10	1514	137	1648	197	1658
chr6.121124174.G.C	na	na	NoRepeat	0	811	6	529	148	571	236	626
chr6.73928314.A.G	na	na	NoRepeat	0	785	0	687	0	579	78	630
chr9.29447933.C.T	na	na	NoRepeat	0	1331	1	1058	0	853	149	949
chr3.73150483.C.A	na	na	NoRepeat	0	822	0	763	1	549	112	655
[truncated: 392 more rows]

## Sheet: SuppTable5
Supplementary Table S5. SJOS010 SNVs detected by capture validation and tumor purity
					Site:	D	D	M	M
					Tumor Purity:	0.65		0.29
					Anatomy:	Left tibia metastasis	Left tibia metastasis	Lung right upper lobe metastasis	Lung right upper lobe metastasis
Chrom.Site.Ref.Alt	Gene	AminoAcidChange	Class	Germline_MutantReads	Germline_TotalReads	D_MutantReads	D_TotalReads	M_MutantReads	M_TotalReads
chr7.48319144.A.C	ABCA13	I2785L	missense	0	71	17	88	0	79
chr3.183665184.C.A	ABCC5	G1114G	silent	0	155	39	182	0	203
chr22.51178219.A.G	ACR	K127E	missense	0	180	0	39	13	61
chr1.18153468.A.T	ACTL8	E3_UTR_3	UTR_3	0	676	3	195	30	314
chr10.72517831.C.G	ADAMTS14	S1020R	missense	0	157	25	112	0	159
chr14.33069893.C.G	AKAP6	I875M	missense	2	220	35	217	1	166
chr11.118095739.C.A	AMICA1	E1_UTR_5	UTR_5	0	972	1	352	79	334
chr18.24434942.A.G	AQP4	E5_UTR_3	UTR_3	0	223	60	203	0	285
chr1.27097632.G.A	ARID1A	R1074Q	missense	4	1468	162	765	313	1139
chr3.169485469.G.C	ARPM1	F290L	missense	0	74	11	51	0	52
chr1.116935596.A.G	ATP1A1	T485A	missense	0	456	120	466	0	578
chr4.83534322.C.T	C4orf11	E4_exon	exon	0	48	10	63	0	104
chr6.35715433.G.A	C6orf81	V258_E5splice_region	splice_region	0	641	0	194	59	297
chr7.6370390.T.C	C7orf70	G132G	silent	0	593	0	187	5	324
chr9.34832569.T.A	C9orf144	E4_exon	exon	0	324	0	150	45	240
chr9.71155498.C.G	C9orf71	R78P	missense	0	814	0	238	14	296
chr2.152689692.C.A	CACNB4	E13_UTR_3	UTR_3	0	45	9	34	0	57
chr7.128411512.A.T	CALU	E8_UTR_3	UTR_3	0	409	0	173	63	332
chr11.104874025.T.C	CASP5	R173R	silent	0	156	50	242	0	170
chr10.70520846.A.G	CCAR1	K668R	missense	1	207	42	127	24	160
chr12.7521535.A.G	CD163L1	S1356P	missense	2	850	107	886	0	807
chr19.51984679.G.A	CEACAM18	A206T	missense	1	524	88	374	0	489
chr2.122097662.C.T	CLASP1	E39_UTR_3	UTR_3	0	568	82	269	126	523
chrX.107936029.G.A	COL4A5	C1521Y	missense	0	100	52	126	20	103
chr5.79646537.G.A	CRSP8P	E1_exon	exon	0	185	43	174	0	310
chr8.113662569.A.T	CSMD3	V1005E	missense	0	83	53	200	0	270
chr1.86047915.A.T	CYR61	R194S	missense	2	932	189	458	203	822
chr1.57602222.C.T	DAB1	K100K	silent	0	800	116	575	1	1264
chr4.41986394.A.T	DCAF4L1	E1_UTR_3	UTR_3	0	322	22	176	43	250
chr18.51061449.A.T	DCC	E29_UTR_3	UTR_3	0	98	8	79	0	218
chr1.97543663.T.C	DPYD	E23_UTR_3	UTR_3	0	228	42	130	45	184
chr11.117298735.G.A	DSCAML1	E33_UTR_3	UTR_3	0	491	0	205	36	251
chr12.93210157.T.C	EEA1	K583R	missense	0	262	66	252	0	301
chr7.36278596.T.C	EEPD1	I294T	missense	1	359	0	185	40	260
chr22.40257949.C.A	ENTHD1	C138F	missense	0	483	0	145	45	329
chr6.82460021.A.G	FAM46A	L240L	silent	0	86	30	79	15	85
chr9.84606396.C.T	FAM75D1	S337S	silent	0	381	129	516	0	589
chr20.3129470.T.A	FASTKD5	T83S	missense	0	391	1	265	46	316
chr4.155488939.G.C	FGB	V229L	missense	0	349	0	159	30	195
chr11.49207409.T.C	FOLH1	K213R	missense	0	73	19	107	0	118
chr2.169765982.T.A	G6PC2	E5_UTR_3	UTR_3	0	89	36	129	0	117
chr5.161116678.A.T	GABRA6	K189I	missense	0	86	17	94	11	118
[truncated: 3,722 more rows]
